# Supplementary material for: Exploring the Mechanisms of Electroacupuncture-Induced Analgesia through RNA Sequencing of the Periaqueductal Gray
Source: MDPI journal article supplement (doi:10.3390/ijms19010002), 2017-12-25

## Supplementary figure 1: Fast QC (quality control) data

Goat ID

Error Rate Distribution

GC Content Distribution

CON001

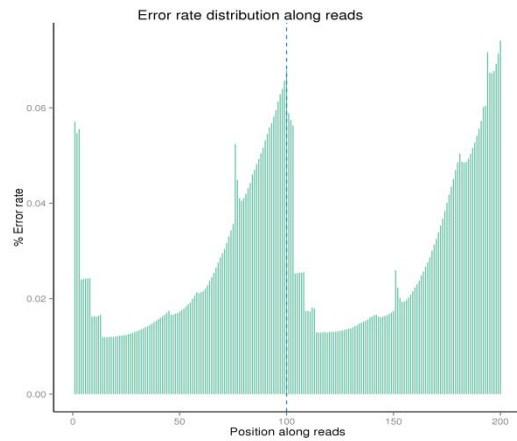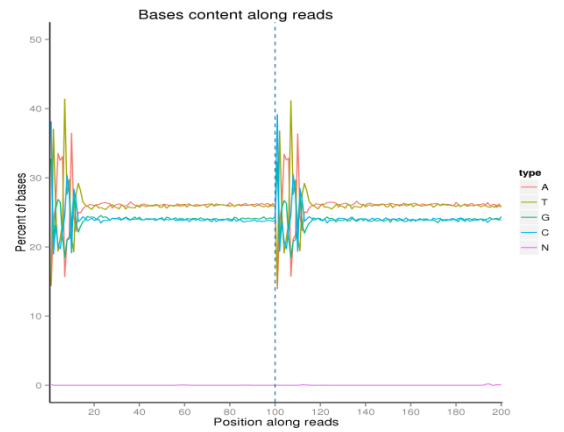

CON002

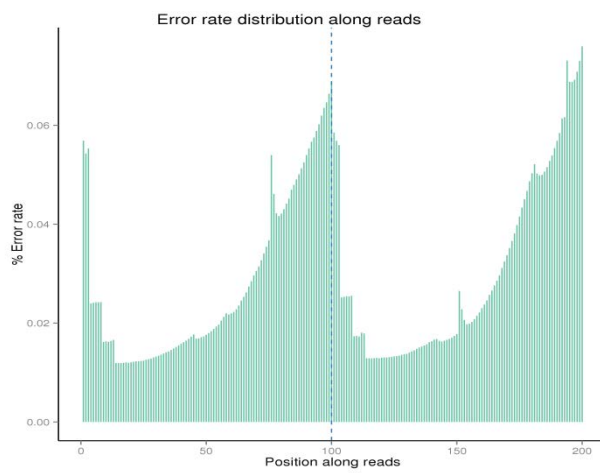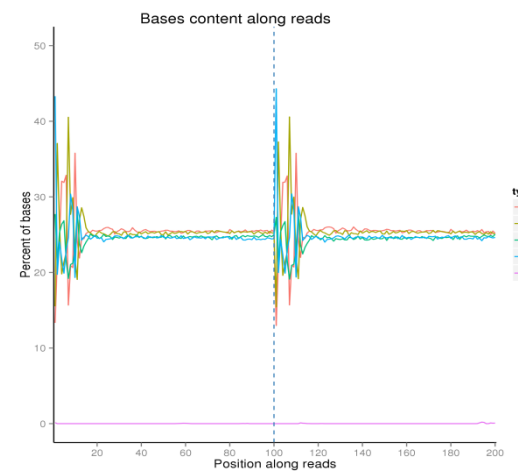

CON003

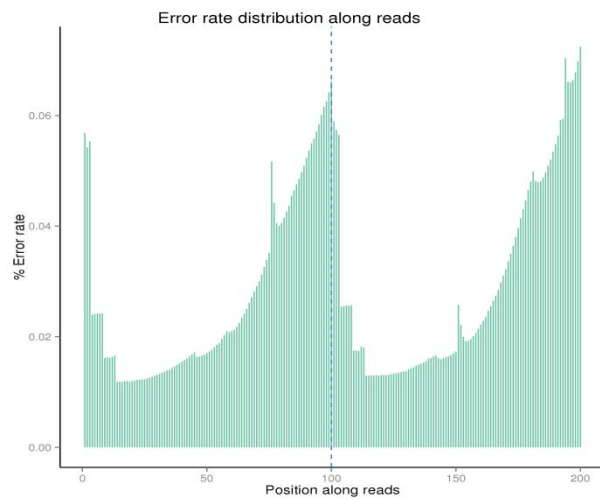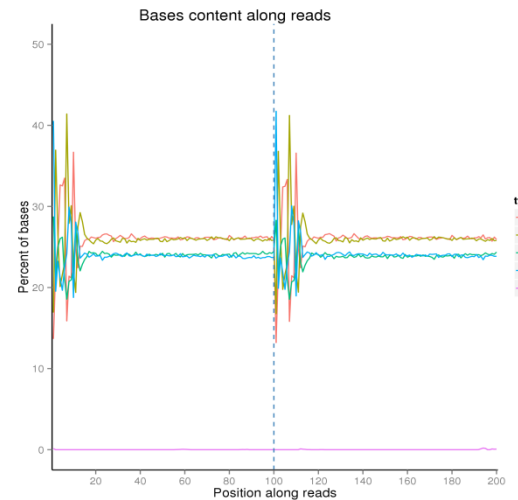

EA001

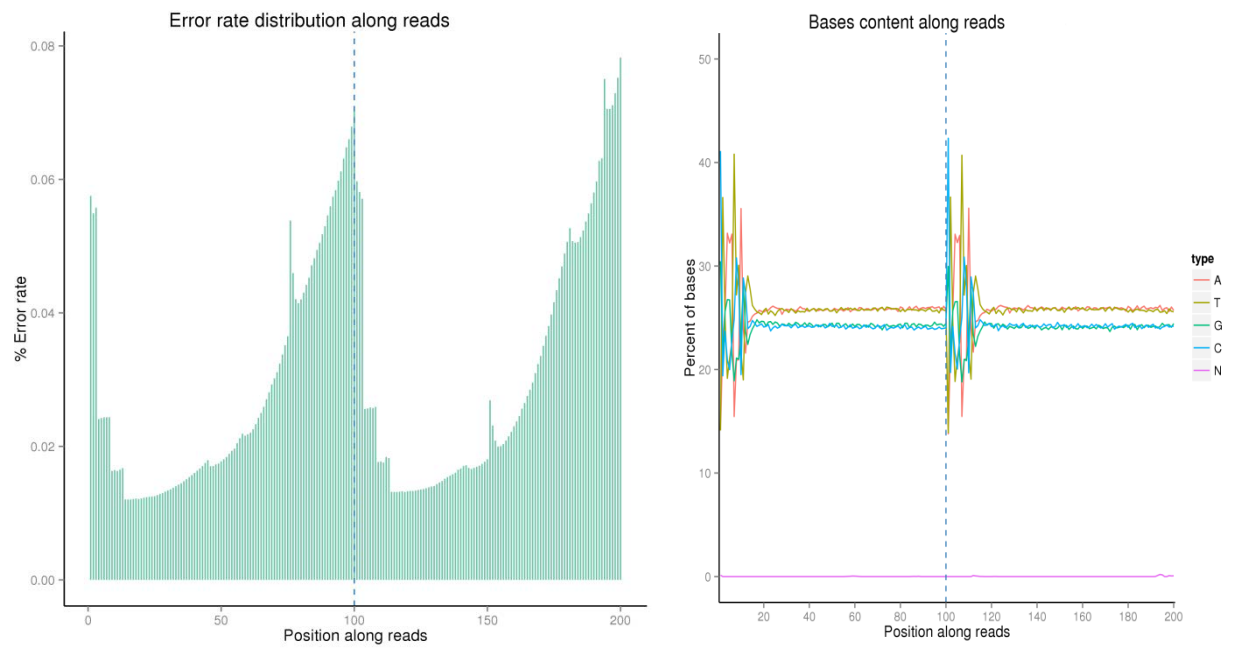

EA002

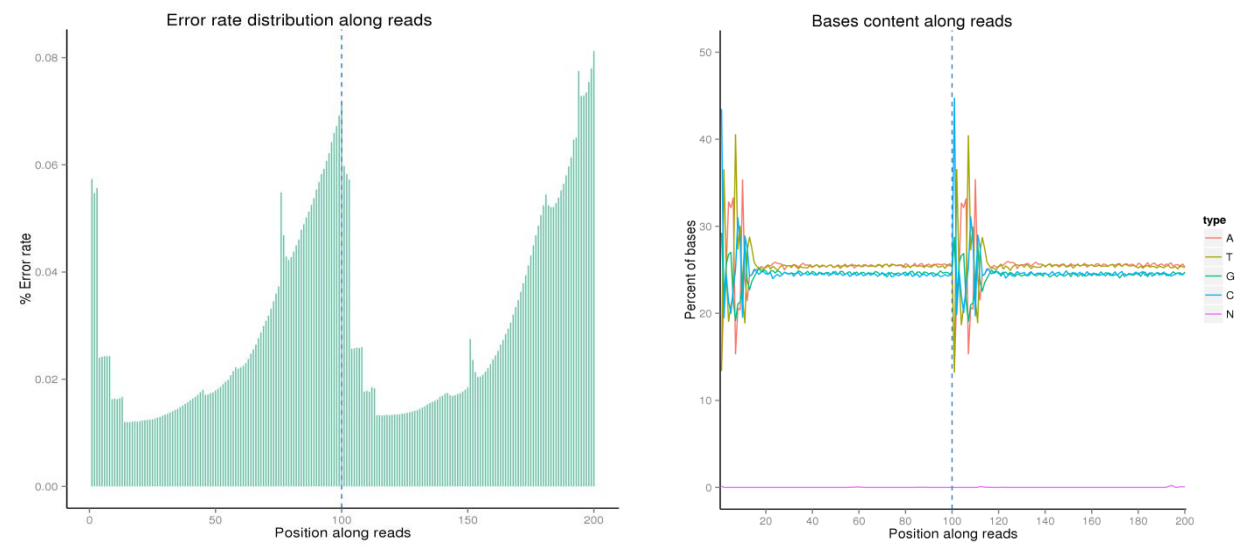

EA003

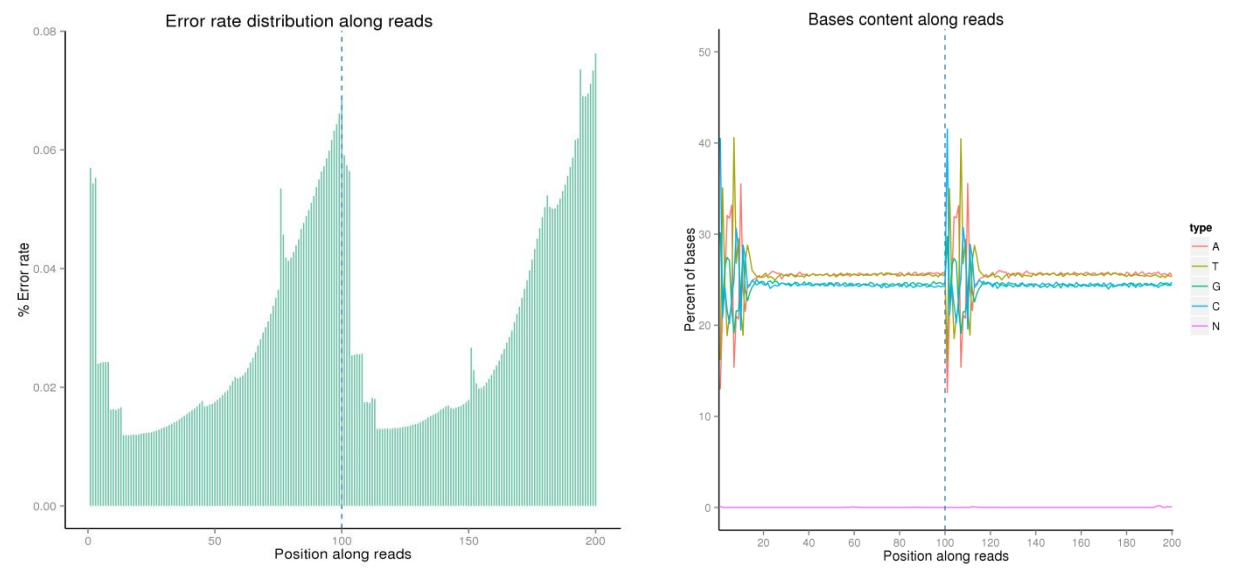

Supplement: s1 [file s1]
