# Supplementary material for: Exploring the Mechanisms of Electroacupuncture-Induced Analgesia through RNA Sequencing of the Periaqueductal Gray
Source: Int J Mol Sci. 2017 Dec 25;19(1):2. doi: 10.3390/ijms19010002 (PMC5795954; doi:10.3390/ijms19010002)
Supplement: Supplementary file 1 [file ijms-19-00002-s001.zip]

Archive with 5 entries (5 files):
- Table S1-DEGs Raw Data.xlsx
- Table S2-GO and KEGG analysis.xlsx
- Table S3-qPCR primer.xlsx
- figure S1.pdf
- Figure S2.jpg
