# Supplementary material for: Exploring the Mechanisms of Electroacupuncture-Induced Analgesia through RNA Sequencing of the Periaqueductal Gray
Source: Int J Mol Sci. 2017 Dec 25;19(1):2. doi: 10.3390/ijms19010002 (PMC5795954; doi:10.3390/ijms19010002)
Supplement: Supplementary file 1 [file ijms-19-00002-s001.zip › Table S1-DEGs Raw Data.xlsx]

## Sheet: CON vs. EA
Gene ID	CON001-readcount	CON002-readcount	CON003-readcount	EA001-readcount	EA002-readcount	EA003-readcount	CON001-rpkm	CON002-rpkm	CON003-rpkm	EA001-rpkm	EA002-rpkm	EA003-rpkm	CON_readcount	EA_readcount	CON_rpkm	EA_rpkm	log2.Fold_change.	pvalue	Corrected pvalue	Gene name	Blast swiss prot	cellular_component	molecular_function	biological_process
GOAT_ENSBTAP00000000027	15	17	15	502	547	544	2.63688	3.02787	3.00236	80.3355	86.9131	85.9599	15.6667	531	2.88904	84.4028	4.86863	1.45e-44	1.56e-41	RAB6A	sp|Q5RAV6|RAB6A_PONAB Ras-related protein Rab-6A OS=Pongo abelii GN=RAB6A PE=2 SV=3//9.98632e-27	GO:0005737//GO:0016020//GO:0005622//GO:0005634	GO:0000166//GO:0003924//GO:0005515//GO:0005525	GO:0006886//GO:0006913//GO:0007165//GO:0015031//GO:0006184//GO:0007264
GOAT_ENSBTAP00000000074	673	785	587	311	304	301	213.582	252.412	212.11	89.8495	87.2014	85.8648	681.667	305.333	226.035	87.6385	-1.36691	1.95e-17	6.05e-16	SDF2L1	sp|Q3T083|SDF2L_BOVIN Stromal cell-derived factor 2-like protein 1 OS=Bos taurus GN=SDF2L1 PE=2 SV=1//8.94867e-49	GO:0016020//GO:0005783//GO:0005788	--	--
GOAT_ENSBTAP00000000096	36	23	17	490	533	510	4.12465	2.66994	2.21772	51.1076	55.1964	52.5234	25.3333	511	3.0041	52.9425	4.13942	2.04e-34	6.76e-32	HSD17B12	sp|Q4R5G7|DHB12_MACFA Estradiol 17-beta-dehydrogenase 12 OS=Macaca fascicularis GN=HSD17B12 PE=2 SV=1//0	GO:0031012	GO:0005518//GO:0005515//GO:0000166//GO:0001968//GO:0008201//GO:0016491	GO:0010811//GO:0030198//GO:0008152//GO:0055114
GOAT_ENSBTAP00000000100	6090	6305	5327	4279	4378	4900	1373.56	1440.81	1368.01	878.575	892.497	993.404	5907.33	4519	1394.13	921.492	-0.597318	2.16e-10	1.87e-09	NDUFB8	sp|Q02372|NDUB8_BOVIN NADH dehydrogenase [ubiquinone] 1 beta subcomplex subunit 8, mitochondrial OS=Bos taurus GN=NDUFB8 PE=1 SV=1//6.66183e-28	GO:0016021//GO:0016020//GO:0005739//GO:0005743//GO:0005747//GO:0070469	GO:0008137//GO:0003954	GO:0006120//GO:0022900
GOAT_ENSBTAP00000000104	101	28	31	405	341	374	15.0291	4.22143	5.25227	54.862	45.8633	50.0244	53.3333	373.333	8.1676	50.2499	2.62114	5e-13	7.02e-12	ATPAF1	sp|Q5TC12|ATPF1_HUMAN ATP synthase mitochondrial F1 complex assembly factor 1 OS=Homo sapiens GN=ATPAF1 PE=1 SV=1//1.90364e-168	GO:0005739	GO:0005515	GO:0006461
GOAT_ENSBTAP00000000106	113	58	71	373	373	371	8.18658	4.25737	5.85673	24.6001	24.4248	24.1599	80.6667	372.333	6.10022	24.395	1.99965	2.02e-07	1.03e-06	EFCAB14	sp|O75071|EFC14_HUMAN EF-hand calcium-binding domain-containing protein 14 OS=Homo sapiens GN=EFCAB14 PE=1 SV=1//0	--	GO:0005509	--
GOAT_ENSBTAP00000000109	484	292	319	1640	1929	1656	45.4371	27.774	34.0981	140.157	163.681	139.741	365	1741.67	35.7697	147.859	2.04742	1.56e-10	1.38e-09	CERS2	sp|Q3ZBF8|CERS2_BOVIN Ceramide synthase 2 OS=Bos taurus GN=CERS2 PE=2 SV=1//0	GO:0016021//GO:0005783//GO:0005634//GO:0016020//GO:0031965//GO:0005789	GO:0043565//GO:0003700//GO:0005515//GO:0003677//GO:0050291	GO:0030148//GO:0006355//GO:0046513//GO:0008610
GOAT_ENSBTAP00000000111	31	26	28	901	751	700	2.05112	1.74298	2.10941	54.2699	44.9127	41.6319	28.3333	784	1.96784	46.9381	4.57608	3e-47	5.79e-44	GPR75	sp|O95800|GPR75_HUMAN Probable G-protein coupled receptor 75 OS=Homo sapiens GN=GPR75 PE=2 SV=1//0	GO:0016021	--	GO:0007186
GOAT_ENSBTAP00000000119	52	40	26	294	313	244	3.0322	2.36321	1.72624	15.6065	16.4967	12.7891	39.3333	283.667	2.37388	14.9641	2.65619	3.54e-12	4.26e-11	KIAA0907	sp|Q7Z7F0|K0907_HUMAN UPF0469 protein KIAA0907 OS=Homo sapiens GN=KIAA0907 PE=1 SV=1//0
GOAT_ENSBTAP00000000160	56	56	31	267	343	224	6.49918	6.58488	4.09643	28.2089	35.9802	23.3677	47.6667	278	5.72683	29.1856	2.34945	2.74e-07	1.37e-06	SETD8	sp|Q9NQR1|SETD8_HUMAN N-lysine methyltransferase SETD8 OS=Homo sapiens GN=SETD8 PE=1 SV=3//5.22654e-24	--	GO:0018024//GO:0003714//GO:0016279//GO:0005515//GO:0002039	GO:0018026//GO:0000122//GO:0034968//GO:0045892//GO:0043516
GOAT_ENSBTAP00000000169	38	47	37	388	274	354	1.87705	2.35223	2.08098	17.4473	12.2333	15.7179	40.6667	338.667	2.10342	15.1328	2.84687	2.99e-15	6.27e-14	RFX4	sp|Q33E94|RFX4_HUMAN Transcription factor RFX4 OS=Homo sapiens GN=RFX4 PE=1 SV=2//0	GO:0005634	GO:0005515//GO:0003682	GO:0021516//GO:0006357//GO:0030900//GO:0030901//GO:0021696//GO:0045944
GOAT_ENSBTAP00000000201	21	7	6	235	240	188	1.09144	0.36861	0.355062	11.1187	11.2743	8.78286	11.3333	221	0.605037	10.3919	4.1023	1.77e-22	1.26e-20	Sp3	sp|O70494|SP3_MOUSE Transcription factor Sp3 OS=Mus musculus GN=Sp3 PE=1 SV=2//0	GO:0005634//GO:0017053//GO:0005622	GO:0008270//GO:0003676//GO:0003677//GO:0001078//GO:0000987//GO:0003690//GO:0003682//GO:0005515//GO:0000979	GO:0030324//GO:0030224//GO:0001503//GO:0001889//GO:0060136//GO:0001701//GO:0001829//GO:0000122//GO:0030183//GO:0030851//GO:0048706//GO:0030217//GO:0030218//GO:0030219//GO:0048596//GO:0045892//GO:0045893//GO:0060216//GO:0001892//GO:0001779//GO:0043353//GO:0006355
GOAT_ENSBTAP00000000210	31	17	25	273	272	293	1.09744	0.609758	1.0077	8.79806	8.70337	9.32363	24.3333	279.333	0.904968	8.94169	3.30461	1.99e-18	7.16e-17	EIF2AK3	sp|Q9NZJ5|E2AK3_HUMAN Eukaryotic translation initiation factor 2-alpha kinase 3 OS=Homo sapiens GN=EIF2AK3 PE=1 SV=3//0	GO:0005789//GO:0005737//GO:0005783	GO:0004674//GO:0004713//GO:0004672//GO:0004694//GO:0005524//GO:0019903//GO:0016772//GO:0042802//GO:0005515	GO:0006926//GO:0031018//GO:0007595//GO:0031016//GO:0001501//GO:0001503//GO:0045444//GO:0030282//GO:0030073//GO:0032092//GO:0006983//GO:0007029//GO:0009967//GO:0019722//GO:0051260//GO:0046777//GO:0002063//GO:0006468//GO:0032933//GO:0019217//GO:0006919//GO:0006915//GO:0030968//GO:0031642//GO:0048009//GO:0017148//GO:0006412//GO:0034976
GOAT_ENSBTAP00000000289	259	121	95	1531	1634	1760	40.2084	19.0323	16.7924	216.37	229.281	245.6	158.333	1641.67	25.3444	230.417	3.18451	1.73e-28	2.74e-26	YWHAZ	sp|Q5R651|1433Z_PONAB 14-3-3 protein zeta/delta OS=Pongo abelii GN=YWHAZ PE=2 SV=1//2.61318e-164	GO:0005737//GO:0042470	GO:0019904//GO:0005515	--
GOAT_ENSBTAP00000000301	71	42	45	660	728	721	4.33022	2.59532	3.12491	36.6438	40.1312	39.5262	52.6667	703	3.35015	38.7671	3.53253	1.82e-29	3.25e-27	STAU1	sp|O95793|STAU1_HUMAN Double-stranded RNA-binding protein Staufen homolog 1 OS=Homo sapiens GN=STAU1 PE=1 SV=2//1.91845e-11	GO:0005737//GO:0005622//GO:0030529	GO:0003723//GO:0005515//GO:0003725	GO:0008298
GOAT_ENSBTAP00000000433	1048	817	1021	580	491	472	212.333	167.713	235.535	106.977	89.9159	85.9599	962	514.333	205.194	94.2841	-1.1219	2.59e-13	3.83e-12	TPPP2	sp|Q3T077|TPPP2_BOVIN Tubulin polymerization-promoting protein family member 2 OS=Bos taurus GN=TPPP2 PE=2 SV=1//8.06327e-28	GO:0005737	GO:0005509	--
GOAT_ENSBTAP00000000445	109	64	74	791	830	838	3.54389	2.10825	2.73942	23.4118	24.3911	24.4904	82.3333	819.667	2.79719	24.0977	3.10685	5.11e-24	4.65e-22	ADNP	sp|Q9H2P0|ADNP_HUMAN Activity-dependent neuroprotector homeobox protein OS=Homo sapiens GN=ADNP PE=1 SV=1//1.14583e-11	GO:0005615//GO:0005634//GO:0005622	GO:0043565//GO:0005515//GO:0003700//GO:0008270//GO:0003676//GO:0003677//GO:0003682	GO:0006355//GO:0043524
GOAT_ENSBTAP00000000448	3027	3864	3308	1193	1239	1346	733.466	948.623	912.654	263.156	271.355	293.164	3399.67	1259.33	864.914	275.891	-1.64846	5.29e-13	7.38e-12	ZNHIT1	sp|O43257|ZNHI1_HUMAN Zinc finger HIT domain-containing protein 1 OS=Homo sapiens GN=ZNHIT1 PE=1 SV=1//8.72452e-18	GO:0005634	GO:0003682//GO:0005515//GO:0046872//GO:0042826	GO:0000122//GO:0042129//GO:0070317//GO:0031063
GOAT_ENSBTAP00000000474	43	32	33	202	242	214	0.583004	0.439585	0.509437	2.49321	2.96564	2.60804	36	219.333	0.510675	2.68896	2.39657	5.02e-09	3.39e-08	BDP1	sp|A6H8Y1|BDP1_HUMAN Transcription factor TFIIIB component B&apos;&apos; homolog OS=Homo sapiens GN=BDP1 PE=1 SV=3//5.21716e-06	--	GO:0003677	--
GOAT_ENSBTAP00000000497	16	10	14	196	220	242	1.08671	0.688152	1.08267	12.1187	13.5057	14.7744	13.3333	219.333	0.952512	13.4662	3.82147	1.52e-20	7.7e-19	ZNF238	sp|A0JN76|ZN238_BOVIN Zinc finger protein 238 OS=Bos taurus GN=ZNF238 PE=2 SV=2//0	GO:0005634//GO:0005622	GO:0043565//GO:0005515//GO:0046872//GO:0003676//GO:0003677//GO:0008270	GO:0048666//GO:0001701//GO:0048872//GO:0000122//GO:0007519//GO:0021987//GO:0021766//GO:0006355//GO:0045892//GO:0006351//GO:0051302//GO:0021549//GO:0007275
GOAT_ENSBTAP00000000504	59	32	36	280	250	243	5.91014	3.24777	4.10603	25.5334	22.6352	21.8801	42.3333	257.667	4.42131	23.3496	2.40085	1.25e-09	9.45e-09	Ascc1	sp|Q9D8Z1|ASCC1_MOUSE Activating signal cointegrator 1 complex subunit 1 OS=Mus musculus GN=Ascc1 PE=2 SV=1//2.48081e-19	GO:0005737//GO:0005622//GO:0005667	GO:0003824//GO:0003723	GO:0016070//GO:0006355
GOAT_ENSBTAP00000000519	1205	952	1072	442	547	626	261.898	209.639	265.285	87.4525	107.456	122.297	1076.33	538.333	245.607	105.735	-1.2159	7.89e-19	3.05e-17	VKORC1	sp|Q6B4J2|VKOR1_BOVIN Vitamin K epoxide reductase complex subunit 1 OS=Bos taurus GN=VKORC1 PE=2 SV=1//2.73466e-13	GO:0005783//GO:0016021//GO:0016020//GO:0005789	GO:0047057//GO:0016491	GO:0042373//GO:0050820//GO:0017144//GO:0055114
GOAT_ENSBTAP00000000570	883	1158	788	569	488	539	100.208	133.15	101.822	58.784	50.0565	54.983	943	532	111.727	54.6078	-1.03279	6.79e-08	3.74e-07	FRA10AC1	sp|Q70Z53|F10C1_HUMAN Protein FRA10AC1 OS=Homo sapiens GN=FRA10AC1 PE=1 SV=3//1.51306e-21	--	GO:0005515	--
GOAT_ENSBTAP00000000576	1660	1908	1550	868	798	939	300.657	350.132	319.646	143.116	130.637	152.872	1706	868.333	323.478	142.208	-1.18566	2.03e-17	6.28e-16	TMEM126A	sp|Q9H061|T126A_HUMAN Transmembrane protein 126A OS=Homo sapiens GN=TMEM126A PE=1 SV=1//2.84444e-50	GO:0016021//GO:0016020//GO:0005739	--	--
GOAT_ENSBTAP00000000630	1670	1920	1567	1205	1216	1238	183.708	213.994	196.27	120.671	120.905	122.414	1719	1219.67	197.991	121.33	-0.706497	1.85e-11	1.96e-10	AKR1A1	sp|Q3ZCJ2|AK1A1_BOVIN Alcohol dehydrogenase [NADP(+)] OS=Bos taurus GN=AKR1A1 PE=2 SV=1//2.31336e-17	GO:0005829//GO:0016324	GO:0004032//GO:0008106//GO:0047939//GO:0016491	GO:0019853//GO:0046185//GO:0042840//GO:0055114
GOAT_ENSBTAP00000000734	49	22	22	295	281	262	3.35988	1.52841	1.7176	18.4143	17.4154	16.1483	31	279.333	2.20196	17.326	2.97607	4.84e-15	9.71e-14	OCLN	sp|Q16625|OCLN_HUMAN Occludin OS=Homo sapiens GN=OCLN PE=1 SV=1//7.02025e-24	GO:0016327//GO:0016324//GO:0016021//GO:0016020//GO:0005911//GO:0005886//GO:0005923//GO:0030054	GO:0005198//GO:0005515	GO:0045216
GOAT_ENSBTAP00000000791	391	251	243	2258	2261	1980	36.8996	23.9998	26.1111	193.988	192.861	167.961	295	2166.33	29.0035	184.937	2.67273	2.71e-20	1.32e-18	CCNI	sp|Q14094|CCNI_HUMAN Cyclin-I OS=Homo sapiens GN=CCNI PE=1 SV=1//2.1714e-48
GOAT_ENSBTAP00000000814	24213	27980	27564	10954	10281	10368	6384.67	7475.27	8275.72	2629.47	2450.33	2457.44	26585.7	10534.3	7378.55	2512.41	-1.55426	1.13e-13	1.81e-12	RPS17	sp|A5PK63|RS17_BOVIN 40S ribosomal protein S17 OS=Bos taurus GN=RPS17 PE=2 SV=1//4.23313e-07	GO:0005622//GO:0005840//GO:0030529//GO:0022627	GO:0003735	GO:0000028//GO:0006414//GO:0006412
GOAT_ENSBTAP00000000819	40	23	25	218	249	271	2.84615	1.65812	2.0254	14.1208	16.0139	17.3327	29.3333	246	2.17656	15.8225	2.86185	2.53e-13	3.75e-12	CPEB1	sp|Q9BZB8|CPEB1_HUMAN Cytoplasmic polyadenylation element-binding protein 1 OS=Homo sapiens GN=CPEB1 PE=1 SV=1//1.36463e-20	GO:0072687//GO:0005624//GO:0016020	GO:0005515//GO:0000166//GO:0003723//GO:0003676//GO:0003729	GO:0006417//GO:0007130//GO:0048168
GOAT_ENSBTAP00000000831	172	106	121	653	635	619	14.8274	9.25829	11.8767	51.2453	49.4776	47.965	133	635.667	11.9874	49.5626	2.04773	4.67e-09	3.18e-08	LSM14A	sp|Q3MHF8|LS14A_BOVIN Protein LSM14 homolog A OS=Bos taurus GN=LSM14A PE=2 SV=1//3.94389e-179	GO:0005737//GO:0010494//GO:0000932//GO:0043231	GO:0003727//GO:0003725//GO:0003690	GO:0051607//GO:0060340//GO:0033962
GOAT_ENSBTAP00000000906	31	25	22	409	420	397	2.24135	1.83137	1.8111	26.92	27.4471	25.801	26	408.667	1.96127	26.7227	3.7682	3.86e-27	5.18e-25	Wdr37	sp|Q8CBE3|WDR37_MOUSE WD repeat-containing protein 37 OS=Mus musculus GN=Wdr37 PE=2 SV=1//1.31784e-16	--	GO:0005515	--
GOAT_ENSBTAP00000000926	2279	2723	2364	1242	1077	1167	609.914	738.348	720.352	302.587	260.519	280.733	2455.33	1162	689.538	281.28	-1.29363	3.92e-14	6.76e-13	Taf10	sp|Q8K0H5|TAF10_MOUSE Transcription initiation factor TFIID subunit 10 OS=Mus musculus GN=Taf10 PE=1 SV=1//1.2748e-82	GO:0005737//GO:0000125//GO:0033276//GO:0005634//GO:0030914//GO:0005669//GO:0048471	GO:0070063//GO:0030331//GO:0003700//GO:0004402//GO:0019899//GO:0005515//GO:0003713	GO:0043966//GO:0051260//GO:0006355//GO:0006352//GO:0016578
GOAT_ENSBTAP00000000950	170	79	122	1371	1679	1235	19.5399	9.20006	15.9664	143.455	174.431	127.597	123.667	1428.33	14.9021	148.494	3.31682	1.47e-22	1.05e-20	NDRG1	sp|Q3SYX0|NDRG1_BOVIN Protein NDRG1 OS=Bos taurus GN=NDRG1 PE=2 SV=1//0	GO:0005737//GO:0015630//GO:0055038//GO:0005813//GO:0005634//GO:0005886//GO:0005913//GO:0048471//GO:0005874	GO:0045296//GO:0017137//GO:0005515//GO:0043015//GO:0008017	GO:0032287//GO:0030330//GO:0090232//GO:0071456//GO:0045576
GOAT_ENSBTAP00000000981	74	42	43	329	360	303	2.81118	1.61657	1.85994	11.3778	12.3611	10.3466	53	330.667	2.0959	11.3618	2.43856	5.95e-11	5.7e-10	LRP8	sp|Q14114|LRP8_HUMAN Low-density lipoprotein receptor-related protein 8 OS=Homo sapiens GN=LRP8 PE=1 SV=4//0
GOAT_ENSBTAP00000000994	95	59	53	1526	1210	1018	4.62259	2.90873	2.93637	67.596	53.2165	44.5253	69	1251.33	3.48923	55.1126	3.9814	1.27e-22	9.28e-21	KAT2B	sp|Q92831|KAT2B_HUMAN Histone acetyltransferase KAT2B OS=Homo sapiens GN=KAT2B PE=1 SV=3//0	GO:0042641//GO:0000123//GO:0005634//GO:0031672//GO:0031674//GO:0005671//GO:0000776//GO:0016585	GO:0003713//GO:0003712//GO:0004402//GO:0042826//GO:0008134//GO:0019901//GO:0004861//GO:0008080//GO:0004468//GO:0016407//GO:0005515	GO:0032869//GO:0016573//GO:0018393//GO:0008285//GO:0043966//GO:0018394//GO:0018076//GO:0010835//GO:0045893//GO:0006355//GO:0045944//GO:0045736
GOAT_ENSBTAP00000001045	3949	5168	3940	2559	2557	2366	410.485	544.279	466.315	242.15	240.237	221.066	4352.33	2494	473.693	234.485	-1.01446	1.13e-08	7.21e-08	PPP1R7	sp|Q3T0W4|PP1R7_BOVIN Protein phosphatase 1 regulatory subunit 7 OS=Bos taurus GN=PPP1R7 PE=1 SV=1//0	GO:0005634	GO:0005515	--
GOAT_ENSBTAP00000001066	45	38	23	411	396	414	4.39719	3.76215	2.55896	36.5603	34.975	36.3631	35.3333	407	3.57277	35.9661	3.33152	9.5e-22	5.98e-20	Atad1	sp|Q9D5T0|ATAD1_MOUSE ATPase family AAA domain-containing protein 1 OS=Mus musculus GN=Atad1 PE=1 SV=1//6.0322e-16	GO:0005739//GO:0030054//GO:0005778//GO:0016020//GO:0005777//GO:0045211//GO:0005886//GO:0045202	GO:0009378//GO:0016887//GO:0000166//GO:0005524//GO:0016787//GO:0017111//GO:0005515	GO:0007612//GO:0007613//GO:0006200//GO:0006281//GO:0002092//GO:0006310//GO:0051967
GOAT_ENSBTAP00000001069	1305	1396	1182	768	746	724	806.885	874.532	832.131	432.282	416.907	402.381	1294.33	746	837.849	417.19	-1.00599	1.05e-15	2.36e-14	COX14	sp|Q1RMH3|COX14_BOVIN Cytochrome c oxidase assembly protein COX14 OS=Bos taurus GN=COX14 PE=3 SV=1//1.85222e-34	GO:0016020//GO:0016021//GO:0005739//GO:0031966	--	GO:0033617
GOAT_ENSBTAP00000001071	2654	2771	2230	1803	2026	2074	377.685	399.534	361.332	233.576	260.596	265.299	2551.67	1967.67	379.517	253.157	-0.584133	4.75e-10	3.87e-09	COPE	sp|Q28104|COPE_BOVIN Coatomer subunit epsilon OS=Bos taurus GN=COPE PE=1 SV=3//6.78835e-168	GO:0005737//GO:0016020//GO:0030663//GO:0005794//GO:0031410//GO:0000139//GO:0030126//GO:0030137	GO:0005515//GO:0005198	GO:0006891//GO:0006890//GO:0016192//GO:0006810//GO:0015031
GOAT_ENSBTAP00000001098	82	68	49	377	298	345	23.5252	19.7659	16.0062	98.4612	77.2742	88.9685	66.3333	340	19.7658	88.2346	2.15834	1.72e-08	1.06e-07	Tax1bp3	sp|Q4QQV1|TX1B3_RAT Tax1-binding protein 3 OS=Rattus norvegicus GN=Tax1bp3 PE=1 SV=1//1.36222e-55	GO:0005737//GO:0005634	GO:0008022//GO:0008013//GO:0005515	GO:0008285//GO:0030178//GO:0030111//GO:0032864//GO:0007266//GO:2000009
GOAT_ENSBTAP00000001128	26	21	17	175	168	167	4.48269	3.66838	3.33724	27.4668	26.1803	25.8809	21.3333	170	3.82944	26.5093	2.7913	1.47e-10	1.31e-09	PPP1R2	sp|Q3SZX2|IPP2_BOVIN Protein phosphatase inhibitor 2 OS=Bos taurus GN=PPP1R2 PE=2 SV=1//4.42943e-132	--	GO:0004864//GO:0005515	GO:0009966//GO:0043666
GOAT_ENSBTAP00000001140	37	28	27	215	247	247	4.22572	3.24001	3.51105	22.3534	25.4974	25.3568	30.6667	236.333	3.65893	24.4025	2.73754	4.56e-12	5.36e-11	NXN	sp|A6QLU8|NXN_BOVIN Nucleoredoxin OS=Bos taurus GN=NXN PE=2 SV=1//1.05783e-16	GO:0005737//GO:0005829//GO:0005634	GO:0047134//GO:0016209//GO:0005515//GO:0004791//GO:0016491	GO:0016055//GO:0030154//GO:0030178//GO:0072358//GO:0031397//GO:0007275//GO:0055114
GOAT_ENSBTAP00000001209	8	21	20	234	218	197	1.10737	2.21757	2.2445	20.4436	20.2321	19.0302	16.3333	216.333	1.85648	19.902	3.4221	1.1106e-05	0.00035987	OPRK1	sp|Q2KIP6|OPRK_BOVIN Kappa-type opioid receptor OS=Bos taurus GN=OPRK1 PE=2 SV=1//1.65329e-14	GO:0051607//GO:0007200//GO:0038003//GO:0007165//GO:0006955//GO:0007186	GO:0016020//GO:0016021//GO:0005886	GO:0004930//GO:0005515//GO:0004871//GO:0004985//GO:0004872
GOAT_ENSBTAP00000001246	13	18	11	505	627	695	2.09058	2.93282	2.01414	73.9299	91.1362	100.463	14	609	2.34585	88.5098	5.23765	6.26e-38	3.32e-35	PLEKHB2	sp|Q5R4K6|PKHB2_PONAB Pleckstrin homology domain-containing family B member 2 OS=Pongo abelii GN=PLEKHB2 PE=2 SV=1//2.27179e-105	--	GO:0005543//GO:0005515	--
GOAT_ENSBTAP00000001248	86	69	59	539	604	670	1.78684	1.45253	1.39577	10.1949	11.3429	12.513	71.3333	604.333	1.54505	11.3503	2.877	6.45e-19	2.54e-17	SIPA1L2	sp|Q9P2F8|SI1L2_HUMAN Signal-induced proliferation-associated 1-like protein 2 OS=Homo sapiens GN=SIPA1L2 PE=1 SV=2//6.23952e-09	GO:0005622	GO:0005096//GO:0005515	GO:0051056//GO:0043547
GOAT_ENSBTAP00000001255	1061	1202	1019	556	592	553	290.451	333.389	317.618	138.56	146.48	136.076	1094	567	313.819	140.372	-1.16068	6.13e-18	2.05e-16	MRPS16	sp|P82915|RT16_BOVIN 28S ribosomal protein S16, mitochondrial OS=Bos taurus GN=MRPS16 PE=1 SV=2//1.03012e-21	GO:0005840//GO:0005739//GO:0030529//GO:0005763//GO:0005622	GO:0003735//GO:0005515	GO:0006412
GOAT_ENSBTAP00000001294	120	95	81	411	381	402	7.60315	6.09853	5.84347	23.7061	21.8191	22.8948	98.6667	398	6.51505	22.8066	1.80761	5.54e-06	2.17e-05	ASH2L	sp|Q9UBL3|ASH2L_HUMAN Set1/Ash2 histone methyltransferase complex subunit ASH2 OS=Homo sapiens GN=ASH2L PE=1 SV=1//0	GO:0005634//GO:0035097//GO:0048188//GO:0071339	GO:0044212//GO:0005515//GO:0042800	GO:0008284//GO:0006974//GO:0045944//GO:0051568//GO:0043627
GOAT_ENSBTAP00000001374	168	90	106	673	622	667	19.4975	10.5828	14.0071	71.1034	65.2469	69.5816	121.333	654	14.6958	68.644	2.22372	5.33e-11	5.17e-10	HIBADH	sp|Q2HJD7|3HIDH_BOVIN 3-hydroxyisobutyrate dehydrogenase, mitochondrial OS=Bos taurus GN=HIBADH PE=2 SV=1//0	GO:0005739	GO:0050662//GO:0008442//GO:0016616//GO:0051287//GO:0000166//GO:0048037//GO:0004616//GO:0016491	GO:0006098//GO:0055114
GOAT_ENSBTAP00000001463	13	8	16	137	128	138	1.45688	0.90836	2.04161	13.9767	12.9655	13.9013	12.3333	134.333	1.46895	13.6145	3.21229	6.38e-12	7.33e-11	ANXA4	sp|P13214|ANXA4_BOVIN Annexin A4 OS=Bos taurus GN=ANXA4 PE=1 SV=2//0	GO:0005737	GO:0005544//GO:0005509	--
GOAT_ENSBTAP00000001465	917	971	925	484	402	458	254.923	273.494	292.789	122.487	101.01	114.447	937.667	448	273.735	112.648	-1.28096	1.27e-19	5.58e-18	MRPS14	sp|Q6B860|RT14_BOVIN 28S ribosomal protein S14, mitochondrial OS=Bos taurus GN=MRPS14 PE=1 SV=1//2.00353e-28	GO:0005840//GO:0005739//GO:0030529//GO:0005622	GO:0003735	GO:0006412
GOAT_ENSBTAP00000001495	18	18	16	241	260	319	1.03947	1.05317	1.05204	12.6695	13.5709	16.5587	17.3333	273.333	1.04822	14.2664	3.7666	1.45e-22	1.04e-20	GALC	sp|P54804|GALC_CANFA Galactocerebrosidase OS=Canis familiaris GN=GALC PE=1 SV=1//4.8459e-16	GO:0005739	GO:0043169//GO:0003824//GO:0004336	GO:0005975//GO:0006683
GOAT_ENSBTAP00000001518	3594	3173	2687	2553	2437	2596	720.036	644.073	612.939	465.62	441.297	467.497	3151.33	2528.67	659.016	458.138	-0.524532	2.04e-09	1.48e-08	CLTA	sp|P04973|CLCA_BOVIN Clathrin light chain A OS=Bos taurus GN=CLTA PE=1 SV=1//7.61141e-127	GO:0031410//GO:0016020//GO:0030659//GO:0005905//GO:0030130//GO:0030132	GO:0005198	GO:0016192//GO:0006886
GOAT_ENSBTAP00000001526	36	46	27	245	232	239	0.528671	0.684432	0.451461	3.27532	3.07943	3.15485	36.3333	238.667	0.554855	3.16987	2.51424	3.1e-10	2.6e-09	HIVEP2	sp|P31629|ZEP2_HUMAN Transcription factor HIVEP2 OS=Homo sapiens GN=HIVEP2 PE=1 SV=2//3.79464e-08	GO:0005622	GO:0008270//GO:0003676	--
GOAT_ENSBTAP00000001642	469	202	230	1835	1266	1151	29.7157	12.9674	16.5926	105.841	72.5012	65.552	300.333	1417.33	19.7585	81.298	2.04074	0.000202599	0.000605398	PLAT	sp|Q28198|TPA_BOVIN Tissue-type plasminogen activator OS=Bos taurus GN=PLAT PE=2 SV=1//5.00062e-06	GO:0005737//GO:0045177//GO:0005615//GO:0030141//GO:0009986//GO:0005576	GO:0016787//GO:0004252//GO:0003824//GO:0005515//GO:0008233//GO:0008236	GO:0014909//GO:0031639//GO:0048008//GO:0006508//GO:0045861//GO:0001666
GOAT_ENSBTAP00000001658	24	7	8	245	251	281	3.75842	1.11066	1.42645	34.9273	35.5276	39.5547	13	259	2.09851	36.6699	4.12716	7.73e-25	7.95e-23	ANKRD46	sp|Q3SX00|ANR46_BOVIN Ankyrin repeat domain-containing protein 46 OS=Bos taurus GN=ANKRD46 PE=2 SV=1//8.05019e-158	GO:0016021//GO:0016020	GO:0005515	--
GOAT_ENSBTAP00000001660	66	28	36	302	360	432	14.8859	6.39851	9.24502	62.0074	73.3894	87.5817	43.3333	364.667	10.1765	74.3262	2.86863	3.18e-12	3.86e-11	TMEM50B	sp|Q5R4C3|TM50B_PONAB Transmembrane protein 50B OS=Pongo abelii GN=TMEM50B PE=2 SV=1//1.52714e-112	GO:0016021//GO:0016020//GO:0005783//GO:0005886	--	--
GOAT_ENSBTAP00000001785	41	24	31	219	256	251	1.41106	0.836877	1.21478	6.86136	7.96343	7.76485	32	242	1.15424	7.52988	2.70569	5.72e-12	6.61e-11	USP38	sp|Q8NB14|UBP38_HUMAN Ubiquitin carboxyl-terminal hydrolase 38 OS=Homo sapiens GN=USP38 PE=2 SV=2//2.18935e-10	--	GO:0016787//GO:0004221//GO:0008233//GO:0008234	GO:0006511//GO:0006508
GOAT_ENSBTAP00000001791-D2	19895	24642	23853	12159	11018	10805	5573.95	6994.94	7609.14	3101.14	2790.11	2721.08	22796.7	11327.3	6726.01	2870.78	-1.22831	4.84e-09	3.27e-08	RPS12	sp|P46405|RS12_PIG 40S ribosomal protein S12 OS=Sus scrofa GN=RPS12 PE=2 SV=2//6.77344e-87	GO:0005737//GO:0005840//GO:0030529//GO:0005622	GO:0003735	GO:0006412
GOAT_ENSBTAP00000001838	172	126	111	1527	1624	1624	5.90822	4.38519	4.34135	47.7499	50.4212	50.1433	136.333	1591.67	4.87825	49.4381	3.34119	1.08e-31	2.36e-29	ATP2A2	sp|P11607|AT2A2_PIG Sarcoplasmic/endoplasmic reticulum calcium ATPase 2 OS=Sus scrofa GN=ATP2A2 PE=2 SV=1//0	GO:0005789//GO:0016021//GO:0016020//GO:0005792//GO:0005624//GO:0016529	GO:0008022//GO:0016820//GO:0000166//GO:0046872//GO:0005524//GO:0016787//GO:0003824//GO:0005388//GO:0005515//GO:0015662	GO:0006984//GO:0002026//GO:0006874//GO:0006812//GO:0006816//GO:0008152//GO:0045822//GO:0006754
GOAT_ENSBTAP00000001839	52	51	44	269	308	276	3.9425	3.91766	3.79834	18.5663	21.1066	18.8094	49	284.333	3.88617	19.4941	2.32662	1.75e-09	1.29e-08	AKT2	sp|P31751|AKT2_HUMAN RAC-beta serine/threonine-protein kinase OS=Homo sapiens GN=AKT2 PE=1 SV=2//6.15681e-16	GO:0005829//GO:0005938//GO:0016020//GO:0000922//GO:0005737//GO:0005634//GO:0005739//GO:0032587//GO:0005623//GO:0030027//GO:0005886	GO:0005543//GO:0000166//GO:0016740//GO:0004713//GO:0004707//GO:0004709//GO:0005524//GO:0016301//GO:0016773//GO:0016772//GO:0051525//GO:0000287//GO:0005515//GO:0034236//GO:0004674//GO:0004672	GO:0010800//GO:0090314//GO:0031340//GO:0000165//GO:0002062//GO:0044027//GO:0072659//GO:0007519//GO:0003214//GO:0071285//GO:0031663//GO:0045823//GO:0035924//GO:0010907//GO:0046325//GO:0046326//GO:0046328//GO:0032496//GO:0003073//GO:0000902//GO:0045648//GO:0051348//GO:0065002//GO:0045725//GO:0016477//GO:2000379//GO:2000467//GO:0071479//GO:0006950//GO:0042307//GO:0048010//GO:0090400//GO:0071879//GO:…
GOAT_ENSBTAP00000001891	83	31	48	339	363	319	4.04967	1.53247	2.66659	15.0573	16.0084	13.9904	54	340.333	2.74958	15.0187	2.44948	3.38e-11	3.4e-10	SLC15A2	sp|Q16348|S15A2_HUMAN Solute carrier family 15 member 2 OS=Homo sapiens GN=SLC15A2 PE=2 SV=2//0	GO:0016021//GO:0016020	GO:0005215//GO:0015198	GO:0006857//GO:0006810
GOAT_ENSBTAP00000001949	32	15	17	224	189	188	1.17941	0.56014	0.713409	7.51569	6.29618	6.22834	21.3333	200.333	0.817654	6.68007	3.0303	2.86e-13	4.19e-12	ZNF280D	sp|Q6N043|Z280D_HUMAN Zinc finger protein 280D OS=Homo sapiens GN=ZNF280D PE=1 SV=3//0	GO:0005622	GO:0008270	--
GOAT_ENSBTAP00000001977	10	5	8	209	227	228	0.690974	0.350043	0.629397	13.1466	14.1771	14.161	7.66667	221.333	0.556805	13.8282	4.6343	9.32e-27	1.17e-24	CDK17	sp|Q00537|CDK17_HUMAN Cyclin-dependent kinase 17 OS=Homo sapiens GN=CDK17 PE=1 SV=2//2.55961e-26	GO:0031594//GO:0005737//GO:0005813//GO:0005634//GO:0016020//GO:0005739//GO:0005886//GO:0005624	GO:0004691//GO:0016740//GO:0000166//GO:0004674//GO:0004713//GO:0005524//GO:0016301//GO:0004672//GO:0019901//GO:0031625//GO:0016772//GO:0005515	GO:0018105//GO:0016310//GO:0050804//GO:2000810//GO:0048240//GO:0046777//GO:0071374//GO:0001707//GO:0071158//GO:0045667//GO:0071333//GO:0006468//GO:0061136//GO:0046827
GOAT_ENSBTAP00000001978	86	74	72	670	588	583	4.36222	3.80304	4.1583	30.9378	26.9579	26.5813	77.3333	613.667	4.10785	28.159	2.77714	9.67e-18	3.13e-16	BCL6	sp|P41182|BCL6_HUMAN B-cell lymphoma 6 protein OS=Homo sapiens GN=BCL6 PE=1 SV=1//0	GO:0005657//GO:0005634//GO:0005622	GO:0031490//GO:0008270//GO:0003676//GO:0003677//GO:0043565//GO:0046872//GO:0003700//GO:0005515//GO:0003682	GO:0008104//GO:0030308//GO:0032764//GO:0043380//GO:0030036//GO:0035024//GO:0043065//GO:0032319//GO:0000902//GO:0000122//GO:0048294//GO:0002829//GO:0000060//GO:0050727//GO:0045629//GO:0043066//GO:0048821//GO:0002467//GO:0042127//GO:0008285//GO:0030890//GO:0030183//GO:0006974//GO:0045596//GO:0007283//GO:0045892//GO:0007266//GO:0051272//GO:0001953//GO:0042092
GOAT_ENSBTAP00000001991	3136	3682	3287	1372	1401	1530	515.88	613.685	615.666	205.462	208.31	226.236	3368.33	1434.33	581.744	213.336	-1.44726	5.7e-16	1.35e-14	MRPL24	sp|Q3SYS0|RM24_BOVIN 39S ribosomal protein L24, mitochondrial OS=Bos taurus GN=MRPL24 PE=1 SV=1//6.39107e-155	GO:0005840//GO:0005739//GO:0030529//GO:0005622	GO:0003735	GO:0006412
GOAT_ENSBTAP00000001993	3873	4991	4242	2310	2147	2379	1240.11	1619.15	1546.52	673.33	621.358	684.705	4368.67	2278.67	1468.59	659.798	-1.15434	1.47e-09	1.09e-08	UQCRB	sp|P00129|QCR7_BOVIN Cytochrome b-c1 complex subunit 7 OS=Bos taurus GN=UQCRB PE=1 SV=3//4.11481e-66	GO:0016020//GO:0005739//GO:0005743//GO:0070469	GO:0008121	GO:0006122//GO:0022900
GOAT_ENSBTAP00000002010	79	43	41	332	326	304	3.2012	1.7654	1.89166	12.247	11.9399	11.0728	54.3333	320.667	2.28609	11.7532	2.36211	4.43e-10	3.63e-09	HACE1	sp|F1N6G5|HACE1_BOVIN E3 ubiquitin-protein ligase HACE1 OS=Bos taurus GN=HACE1 PE=3 SV=3//0	GO:0005622//GO:0000139	GO:0017137//GO:0016881//GO:0048365//GO:0005515//GO:0004842	GO:0007030//GO:0030334//GO:0006464//GO:0016567//GO:0042787//GO:0006944//GO:0070936
GOAT_ENSBTAP00000002028	127	123	94	530	558	520	8.34142	8.18523	7.02971	31.6896	33.126	30.6999	114.667	536	7.85212	31.8385	2.01962	2.08e-08	1.26e-07	UBQLN4	sp|Q9NRR5|UBQL4_HUMAN Ubiquilin-4 OS=Homo sapiens GN=UBQLN4 PE=1 SV=2//9.09122e-27	GO:0005737//GO:0005634//GO:0031595//GO:0031597//GO:0005789//GO:0005829	GO:0003684//GO:0005488//GO:0005515//GO:0031593	GO:0032434//GO:0043161//GO:0006289
GOAT_ENSBTAP00000002111	13	7	7	176	161	138	1.54371	0.842189	0.946441	19.0257	17.2801	14.7299	9	158.333	1.11078	17.0119	3.9369	1.64e-17	5.14e-16	Tmem41b	sp|Q5FVN2|TM41B_RAT Transmembrane protein 41B OS=Rattus norvegicus GN=Tmem41b PE=2 SV=1//0
GOAT_ENSBTAP00000002162	4	7	6	129	158	124	0.0702135	0.124494	0.119918	2.06137	2.50678	1.9565	5.66667	137	0.104875	2.17488	4.37419	1.9e-18	6.87e-17	UNC13C	sp|Q8NB66|UN13C_HUMAN Protein unc-13 homolog C OS=Homo sapiens GN=UNC13C PE=1 SV=3//9.76499e-09	GO:0005622	GO:0046872//GO:0005515	GO:0035556//GO:0007268
GOAT_ENSBTAP00000002176	425	505	346	181	168	198	171.249	206.167	158.741	66.393	61.1853	71.7137	425.333	182.333	178.719	66.4307	-1.42777	6.44e-14	1.07e-12	PDF	sp|Q9HBH1|DEFM_HUMAN Peptide deformylase, mitochondrial OS=Homo sapiens GN=PDF PE=1 SV=1//7.21088e-10	GO:0005739	GO:0042586//GO:0005506	GO:0008284//GO:0018206//GO:0031365
GOAT_ENSBTAP00000002230	40	34	24	301	394	332	3.90862	3.36613	2.67022	26.7753	34.7983	29.1608	32.6667	342.333	3.31499	30.2448	3.18961	8.61e-19	3.3e-17	SYT13	sp|Q7L8C5|SYT13_HUMAN Synaptotagmin-13 OS=Homo sapiens GN=SYT13 PE=1 SV=1//8.12463e-15	GO:0030133//GO:0005887	GO:0005515	GO:0016192
GOAT_ENSBTAP00000002277	29	26	22	197	185	185	0.70412	0.639604	0.608197	4.35431	4.05994	4.03755	25.6667	189	0.65064	4.1506	2.67339	2.4e-10	2.05e-09	ZCCHC6	sp|Q5VYS8|TUT7_HUMAN Terminal uridylyltransferase 7 OS=Homo sapiens GN=ZCCHC6 PE=1 SV=1//1.88541e-10	--	GO:0050265//GO:0046872//GO:0003676//GO:0008270	GO:0031123
GOAT_ENSBTAP00000002279	48	10	21	215	160	202	5.01853	1.05931	2.49993	20.4634	15.1201	18.9838	26.3333	192.333	2.85926	18.1891	2.66936	4.61e-10	3.77e-09	LUM	sp|Q05443|LUM_BOVIN Lumican OS=Bos taurus GN=LUM PE=1 SV=1//2.51441e-25	GO:0005783//GO:0016021//GO:0016020//GO:0046658//GO:0005622//GO:0035748//GO:0042383//GO:0031252//GO:0044424//GO:0042734//GO:0032009//GO:0031012//GO:0034750//GO:0005737//GO:0005583//GO:0005634//GO:0009986//GO:0016323//GO:0045211//GO:0005911//GO:0032281//GO:0030133//GO:0005614//GO:0005615//GO:0005886//GO:0005764//GO:0005576//GO:0005913//GO:0005768//GO:0005578	GO:0008201//GO:0005154//GO:0004930//GO:0005543//GO:0003824//GO:0070052//GO:0005539//GO:0005509//GO:0050840//GO:0042562//GO:0003727//GO:0003725//GO:0005515//GO:0005102//GO:0005518//GO:0004872//GO:0016500//GO:0035197	GO:0008105//GO:0061303//GO:0008584//GO:0007160//GO:0060658//GO:0007165//GO:0007409//GO:0072224//GO:0009615//GO:0007188//GO:0032728//GO:0032722//GO:0034154//GO:0030512//GO:0045416//GO:0030198//GO:0032735//GO:0060561//GO:0032733//GO:0048715//GO:0045930//GO:0071260//GO:0010628//GO:0031175//GO:0030282//GO:0051770//GO:0035089//GO:0010544//GO:0007189//GO:0001843//GO:0016477//GO:0007186//GO:0032760//GO:…
GOAT_ENSBTAP00000002285	54	22	34	505	539	480	3.05928	1.26281	2.1932	26.0448	27.6003	24.4436	36.6667	508	2.17176	26.0295	3.58321	3.65e-27	4.97e-25	CDH20	sp|Q9HBT6|CAD20_HUMAN Cadherin-20 OS=Homo sapiens GN=CDH20 PE=2 SV=2//0	GO:0016021//GO:0016020//GO:0005886	GO:0005509	GO:0007155//GO:0007156
GOAT_ENSBTAP00000002326	13282	15930	15986	5741	5196	5583	4106.15	4989.72	5627.09	1615.71	1451.91	1551.45	15066	5506.67	4907.65	1539.69	-1.6724	1e-11	1.11e-10	RPLP2	sp|P19943|RLA2_RABIT 60S acidic ribosomal protein P2 (Fragment) OS=Oryctolagus cuniculus GN=RPLP2 PE=1 SV=1//4.65951e-21	GO:0005840//GO:0030529//GO:0005622	GO:0003735	GO:0006414
GOAT_ENSBTAP00000002345	2611	3093	2682	1133	1176	1299	786.845	944.39	920.268	310.826	320.323	351.876	2795.33	1202.67	883.834	327.675	-1.43151	5.31e-16	1.27e-14	QIL1	sp|A1XQR7|QIL1_PIG Protein QIL1 OS=Sus scrofa GN=QIL1 PE=3 SV=1//9.54014e-73	GO:0005739	--	--
GOAT_ENSBTAP00000002349	8364	11464	10842	3143	2921	2912	3999.28	5553.84	5902.7	1368.1	1262.4	1251.58	10223.3	2992	5151.94	1294.03	-1.99325	4.98e-10	4.04e-09	RPL36	sp|Q5RAZ9|RL36_PONAB 60S ribosomal protein L36 OS=Pongo abelii GN=RPL36 PE=3 SV=3//6.10292e-24	GO:0005840//GO:0030529//GO:0005622	GO:0003735	GO:0006412
GOAT_ENSBTAP00000002357	16	15	5	274	312	300	1.34062	1.2734	0.477011	20.8997	23.6286	22.5946	12	295.333	1.03034	22.3743	4.44065	1.82e-29	3.25e-27	SYT4	sp|Q9H2B2|SYT4_HUMAN Synaptotagmin-4 OS=Homo sapiens GN=SYT4 PE=1 SV=1//0	GO:0008021//GO:0016020//GO:0043005//GO:0048471	GO:0005515//GO:0005215//GO:0005509	GO:0006810//GO:0007269
GOAT_ENSBTAP00000002363	162	143	129	608	604	542	8.49352	7.59623	7.7008	29.0189	28.6226	25.5429	144.667	584.667	7.93019	27.7281	1.80592	1.34e-06	5.89e-06	AKAP8	sp|O43823|AKAP8_HUMAN A-kinase anchor protein 8 OS=Homo sapiens GN=AKAP8 PE=1 SV=1//0	GO:0005634//GO:0005622//GO:0001939//GO:0000793//GO:0016363	GO:0008270//GO:0005515//GO:0003677	GO:0007076
GOAT_ENSBTAP00000002383	71	77	63	357	465	435	13.1246	14.4214	13.2599	60.0759	77.6925	72.2794	70.3333	419	13.602	70.0159	2.36387	2.85e-11	2.9e-10	Snx10	sp|Q9CWT3|SNX10_MOUSE Sorting nexin-10 OS=Mus musculus GN=Snx10 PE=2 SV=1//1.461e-11	GO:0005737//GO:0016020//GO:0031313//GO:0005768//GO:0010008	GO:0035091//GO:0008289//GO:0005545//GO:0005515	GO:0007032//GO:0006810//GO:0015031//GO:0007154
GOAT_ENSBTAP00000002406	6540	7897	5595	4984	3459	4348	1033.19	1264.02	1006.41	716.78	493.916	617.434	6677.33	4263.67	1101.21	609.377	-0.853682	4.54e-09	3.1e-08	Gstm5	sp|Q9Z1B2|GSTM5_RAT Glutathione S-transferase Mu 5 OS=Rattus norvegicus GN=Gstm5 PE=1 SV=3//9.87111e-132
GOAT_ENSBTAP00000002433	49	49	25	322	404	443	0.403309	0.408627	0.234291	2.41269	3.00554	3.2775	41	389.667	0.348742	2.89858	3.05511	9.25e-17	2.49e-15	SACS	sp|Q9NZJ4|SACS_HUMAN Sacsin OS=Homo sapiens GN=SACS PE=1 SV=2//3.84188e-33	GO:0005737//GO:0005634//GO:0005739	GO:0070628//GO:0030544//GO:0031072//GO:0051087//GO:0005515//GO:0005524	GO:0090084
GOAT_ENSBTAP00000002506	153	117	91	838	857	821	13.8907	10.7623	9.4069	69.2597	70.3253	66.9997	120.333	838.667	11.3533	68.8616	2.60059	1.81e-16	4.62e-15	RAD23B	sp|Q29RK4|RD23B_BOVIN UV excision repair protein RAD23 homolog B OS=Bos taurus GN=RAD23B PE=2 SV=1//1.39034e-24	GO:0005737//GO:0005634//GO:0071942//GO:0000502	GO:0005515//GO:0031593//GO:0003684	GO:0032434//GO:0006281//GO:0043161//GO:0006289//GO:0006974//GO:0007283//GO:0000715
GOAT_ENSBTAP00000002582	142	65	82	849	1141	1073	11.4178	5.29537	7.50726	62.1451	82.9237	77.5518	96.3333	1021	8.07348	74.2069	3.20029	6.81e-21	3.63e-19	CYP51A1	sp|Q4PJW3|CP51A_BOVIN Lanosterol 14-alpha demethylase OS=Bos taurus GN=CYP51A1 PE=2 SV=1//1.78241e-11	GO:0005783//GO:0005792//GO:0016021//GO:0016020//GO:0005789	GO:0008398//GO:0004497//GO:0016705//GO:0020037//GO:0016491//GO:0009055//GO:0005506//GO:0046872	GO:0016126//GO:0006695//GO:0006694//GO:0055114//GO:0008610
GOAT_ENSBTAP00000002642	25287	31180	27301	13452	11766	12289	4257.42	5318.81	5233.61	2061.77	1790.51	1859.79	27922.7	12502.3	4936.61	1904.03	-1.37447	1.34e-12	1.75e-11	RPL14	sp|Q3T0U2|RL14_BOVIN 60S ribosomal protein L14 OS=Bos taurus GN=RPL14 PE=2 SV=3//1.83789e-77	GO:0005737//GO:0005840//GO:0022625//GO:0005622//GO:0030529	GO:0003735//GO:0005515	GO:0042273//GO:0006364//GO:0006412
GOAT_ENSBTAP00000002661	142	36	56	595	573	537	10.3925	2.66947	4.66653	39.6419	37.9041	35.3269	78	568.333	5.90951	37.6243	2.67055	1.13e-15	2.53e-14	ZNF470	sp|Q6ECI4|ZN470_HUMAN Zinc finger protein 470 OS=Homo sapiens GN=ZNF470 PE=1 SV=3//4.69228e-91	GO:0005737//GO:0005730//GO:0005634//GO:0005622	GO:0003676//GO:0008270//GO:0005515//GO:0003677//GO:0046872	GO:0006355//GO:0006351
GOAT_ENSBTAP00000002684	194	80	71	1091	1345	1310	14.494	6.05574	6.03976	74.2023	90.8258	87.9745	115	1248.67	8.86318	84.3342	3.25022	2.01e-28	3.11e-26	STAU2	sp|Q9NUL3|STAU2_HUMAN Double-stranded RNA-binding protein Staufen homolog 2 OS=Homo sapiens GN=STAU2 PE=1 SV=1//2.37789e-06	GO:0005622	GO:0003725//GO:0003723	--
GOAT_ENSBTAP00000002748	13	8	9	130	159	125	0.871402	0.543318	0.686896	7.93274	9.63322	7.53153	10	138	0.700539	8.36583	3.57797	4.4e-14	7.53e-13	TCP11L2	sp|A7Z033|T11L2_BOVIN T-complex protein 11-like protein 2 OS=Bos taurus GN=TCP11L2 PE=2 SV=1//0
GOAT_ENSBTAP00000002843	1530	1394	1523	1017	955	1109	485.559	448.232	550.331	293.817	273.938	316.359	1482.33	1027	494.707	294.705	-0.747305	7.8e-12	8.81e-11	Tceb1	sp|P83941|ELOC_RAT Transcription elongation factor B polypeptide 1 OS=Rattus norvegicus GN=Tceb1 PE=1 SV=1//1.006e-27	GO:0005634	GO:0005515	GO:0006355//GO:0006511//GO:0006351
GOAT_ENSBTAP00000002867	69	33	54	526	356	384	3.61233	1.75042	3.21889	25.0685	16.8456	18.0704	52	422	2.86054	19.9949	2.80527	4.14e-11	4.09e-10	GFPT2	sp|Q08DQ2|GFPT2_BOVIN Glutamine--fructose-6-phosphate aminotransferase [isomerizing] 2 OS=Bos taurus GN=GFPT2 PE=1 SV=1//0	GO:0005737	GO:0004360//GO:0030246//GO:0008483//GO:0016740	GO:0006048//GO:0005975//GO:0006541//GO:0016051//GO:0008152
GOAT_ENSBTAP00000002872	65	16	21	578	586	595	4.91772	1.22648	1.80902	39.8092	40.0726	40.4637	34	586.333	2.65107	40.1152	3.9195	5.16e-33	1.38e-30	SPTLC1	sp|Q3MHG1|SPTC1_BOVIN Serine palmitoyltransferase 1 OS=Bos taurus GN=SPTLC1 PE=2 SV=1//0	GO:0005783//GO:0016021//GO:0016020//GO:0017059//GO:0035339//GO:0005789	GO:0030170//GO:0004758//GO:0016740//GO:0003824//GO:0005515//GO:0016746	GO:0046513//GO:0009058//GO:0006686//GO:0046512//GO:0006665//GO:0046511
GOAT_ENSBTAP00000002878	43	28	28	265	345	326	3.89406	2.5691	2.88712	21.8466	28.2392	26.5369	33	312	3.11676	25.5409	3.03469	1.51e-16	3.91e-15	Fbxo31	sp|Q3TQF0|FBX31_MOUSE F-box only protein 31 OS=Mus musculus GN=Fbxo31 PE=1 SV=1//4.18273e-07	--	GO:0005515	GO:0006974//GO:0008054
GOAT_ENSBTAP00000002922	40	51	41	278	328	304	4.44106	5.73701	5.18303	28.098	32.9154	30.3388	44	303.333	5.12037	30.4507	2.57216	5.45e-12	6.33e-11	ANKRD40	sp|Q6AI12|ANR40_HUMAN Ankyrin repeat domain-containing protein 40 OS=Homo sapiens GN=ANKRD40 PE=1 SV=2//6.7295e-175	--	GO:0005515	--
GOAT_ENSBTAP00000002933	32	7	10	383	372	405	6.59523	1.46173	2.34668	71.8594	69.2982	75.0296	16.3333	386.667	3.46788	72.0624	4.37712	4.59e-33	1.26e-30	Ptp4a1	sp|Q78EG7|TP4A1_RAT Protein tyrosine phosphatase type IVA 1 OS=Rattus norvegicus GN=Ptp4a1 PE=1 SV=1//1.50387e-19	GO:0005737//GO:0009898	GO:0016791//GO:0008138//GO:0004725	GO:0030335//GO:0016311//GO:0006470//GO:0035335
GOAT_ENSBTAP00000002967	178	38	48	771	845	991	52.755	11.4108	16.1979	208.019	226.36	264.007	88	869	26.7879	232.795	3.11941	3.55e-15	7.32e-14	CD59	sp|O62680|CD59_PIG CD59 glycoprotein OS=Sus scrofa GN=CD59 PE=1 SV=1//6.47693e-07	GO:0031362//GO:0009986	GO:0005515	--
GOAT_ENSBTAP00000002986	115	47	55	414	363	387	10.9683	4.5418	5.97279	35.9456	31.293	33.178	72.3333	388	7.16096	33.4722	2.22474	1.98e-09	1.44e-08	RNF34	sp|Q5E9J6|RNF34_BOVIN E3 ubiquitin-protein ligase RNF34 OS=Bos taurus GN=RNF34 PE=2 SV=1//7.10464e-33	GO:0016607//GO:0005634//GO:0016020//GO:0012505	GO:0005515//GO:0046872//GO:0016874//GO:0008270	GO:0006915//GO:0016567
GOAT_ENSBTAP00000003033	48	40	32	285	269	295	2.44511	2.06446	1.85601	13.2162	12.3853	13.5075	40	283	2.12186	13.0364	2.61914	6.06e-12	6.98e-11	PIK3R2	sp|P23726|P85B_BOVIN Phosphatidylinositol 3-kinase regulatory subunit beta OS=Bos taurus GN=PIK3R2 PE=1 SV=1//1.44049e-06	GO:0005942//GO:0005622	GO:0005515//GO:0016303//GO:0030971//GO:0035014	GO:0043551//GO:0019987//GO:0007165
GOAT_ENSBTAP00000003052	190	179	102	620	656	688	10.4505	9.97525	6.38785	31.044	32.6125	34.0148	157	654.667	8.93785	32.5571	1.86497	3.85e-07	1.87e-06	Tmcc2	sp|Q80W04|TMCC2_MOUSE Transmembrane and coiled-coil domains protein 2 OS=Mus musculus GN=Tmcc2 PE=1 SV=1//0	GO:0016021	GO:0005515	--
GOAT_ENSBTAP00000003071	60	57	51	325	296	290	14.9191	13.8997	13.9761	71.2083	64.3922	62.7392	56	303.667	14.265	66.1132	2.21226	1.58e-11	1.4e-10	PPIL1	sp|Q9Y3C6|PPIL1_HUMAN Peptidyl-prolyl cis-trans isomerase-like 1 OS=Homo sapiens GN=PPIL1 PE=1 SV=1//1.39539e-08	GO:0071013//GO:0005681	GO:0016853//GO:0005515//GO:0003755	GO:0000413//GO:0006457//GO:0008380//GO:0006397
GOAT_ENSBTAP00000003131	659	260	299	2265	2419	2696	101.428	40.5448	52.3983	317.356	336.518	372.985	406	2460	64.7904	342.286	2.40135	4.49e-15	9.05e-14	TSPAN3	sp|Q3SZR9|TSN3_BOVIN Tetraspanin-3 OS=Bos taurus GN=TSPAN3 PE=2 SV=1//5.83414e-46	GO:0016021//GO:0016020	--	--
GOAT_ENSBTAP00000003132	34	62	41	203	251	239	3.20866	5.92825	4.40557	17.44	21.4101	20.2741	45.6667	231	4.51416	19.7081	2.12625	2.75e-07	1.37e-06	KCNJ10	sp|P78508|IRK10_HUMAN ATP-sensitive inward rectifier potassium channel 10 OS=Homo sapiens GN=KCNJ10 PE=1 SV=1//0	GO:0030016//GO:0031224//GO:0016021//GO:0016020//GO:0030315//GO:0008282//GO:0005886//GO:0016323//GO:0008076	GO:0005267//GO:0015467//GO:0044325//GO:0015272//GO:0030506//GO:0042802//GO:0005249//GO:0005216//GO:0005524//GO:0005515//GO:0005244//GO:0005242	GO:0042391//GO:0051289//GO:0001822//GO:0009791//GO:0022010//GO:0072358//GO:0055075//GO:0046676//GO:0010107//GO:0034765//GO:0048169//GO:0032496//GO:0071805//GO:0051935//GO:0015693//GO:0006811//GO:0043330//GO:0006813//GO:0050877//GO:0006810//GO:0007601//GO:0050796//GO:0007628//GO:0060075//GO:0014003//GO:0001894//GO:0033198//GO:0007507//GO:0051607//GO:0070294//GO:0006006
GOAT_ENSBTAP00000003190	959	923	1012	602	597	631	347.386	338.754	417.395	198.516	195.464	205.457	964.667	610	367.845	199.812	-0.880453	2.02e-12	2.54e-11	SEC61B	sp|Q5RB31|SC61B_PONAB Protein transport protein Sec61 subunit beta OS=Pongo abelii GN=SEC61B PE=3 SV=3//5.35636e-28	GO:0031205	GO:0005515//GO:0048408//GO:0043022	GO:0000060//GO:0030970//GO:0030433
GOAT_ENSBTAP00000003200	7843	10198	9798	3796	3345	3012	1598.08	2105.33	2273.14	704.121	616.044	551.657	9279.67	3384.33	1992.19	623.941	-1.67487	7.23e-10	5.69e-09	FAM173A	sp|Q9BQD7|F173A_HUMAN Protein FAM173A OS=Homo sapiens GN=FAM173A PE=2 SV=1//4.50938e-90
GOAT_ENSBTAP00000003201	22621	23135	21823	10817	8813	8592	11588.9	12008.5	12729.7	5044.78	4080.88	3956.61	22526.3	9407.33	12109.1	4360.76	-1.47344	8.59e-26	9.63e-24	Rps28	sp|P62859|RS28_RAT 40S ribosomal protein S28 OS=Rattus norvegicus GN=Rps28 PE=1 SV=1//4.30129e-32	GO:0005840//GO:0030529//GO:0015935//GO:0005622//GO:0022627	GO:0003735	GO:0042274//GO:0006364//GO:0006412//GO:0006407
GOAT_ENSBTAP00000003220	1395	1248	1143	866	879	784	176.151	159.667	164.335	99.5482	100.323	88.9866	1262	843	166.718	96.2858	-0.792011	1.6e-12	2.05e-11	Haghl	sp|Q9DB32|HAGHL_MOUSE Hydroxyacylglutathione hydrolase-like protein OS=Mus musculus GN=Haghl PE=2 SV=1//3.12392e-150	--	GO:0016787//GO:0004416//GO:0008270	GO:0006750
GOAT_ENSBTAP00000003333	113	51	93	500	517	481	6.81068	3.11438	6.38217	27.4339	28.1645	26.0588	85.6667	499.333	5.43574	27.2191	2.32407	1.65e-11	1.76e-10	UBA2	sp|Q9UBT2|SAE2_HUMAN SUMO-activating enzyme subunit 2 OS=Homo sapiens GN=UBA2 PE=1 SV=2//0	--	GO:0046982//GO:0019948//GO:0008134//GO:0008641//GO:0000166//GO:0003824//GO:0005515//GO:0016874//GO:0005524	GO:0006464//GO:0016925
GOAT_ENSBTAP00000003338	97	79	68	822	869	859	5.76877	4.76023	4.60462	44.5029	46.7122	45.9201	81.3333	850	5.04454	45.7117	3.17977	2.36e-25	2.55e-23	ZMYND11	sp|Q15326|ZMY11_HUMAN Zinc finger MYND domain-containing protein 11 OS=Homo sapiens GN=ZMYND11 PE=1 SV=2//7.8585e-15	GO:0005737//GO:0005634	GO:0008270//GO:0005515//GO:0046872	GO:0046329//GO:0043124
GOAT_ENSBTAP00000003340	1629	1776	1397	953	824	953	222.971	246.297	217.72	118.748	101.942	117.252	1600.67	910	228.996	112.647	-1.02351	2.88e-16	7.11e-15	fbl	sp|P22232|FBRL_XENLA rRNA 2&apos;-O-methyltransferase fibrillarin OS=Xenopus laevis GN=fbl PE=2 SV=1//7.81194e-12	GO:0005730//GO:0001652//GO:0015030	GO:0005515//GO:0008168//GO:0003723	GO:0016074//GO:0006364//GO:0008033//GO:0032259
GOAT_ENSBTAP00000003354	1544	1692	1526	1158	1021	982	61.8662	68.6903	69.62	42.2396	36.9769	35.3684	1587.33	1053.67	66.7255	38.195	-0.804856	9.26e-13	1.24e-11	EXOSC10	sp|Q01780|EXOSX_HUMAN Exosome component 10 OS=Homo sapiens GN=EXOSC10 PE=1 SV=2//0	GO:0005737//GO:0005730//GO:0005634//GO:0035327//GO:0000178//GO:0000176//GO:0005622	GO:0004532//GO:0003676//GO:0008408//GO:0000166//GO:0003824//GO:0005515	GO:0071044//GO:0000184//GO:0071028//GO:0071048//GO:0009048//GO:0006139//GO:0071035//GO:0071034//GO:0000460//GO:0044237//GO:0000956//GO:0006396
GOAT_ENSBTAP00000003398	31	7	20	225	217	145	3.29884	0.754721	2.42327	21.7965	20.8717	13.8696	19.3333	195.667	2.15894	18.8459	3.12586	2.98e-10	2.51e-09	Pstpip2	sp|Q99M15|PPIP2_MOUSE Proline-serine-threonine phosphatase-interacting protein 2 OS=Mus musculus GN=Pstpip2 PE=1 SV=4//7.50656e-07
GOAT_ENSBTAP00000003441	39	17	17	243	220	227	2.67931	1.1833	1.32978	15.1974	13.6609	14.0179	24.3333	230	1.7308	14.2921	3.0457	2.65e-14	4.69e-13	STAM	sp|Q92783|STAM1_HUMAN Signal transducing adapter molecule 1 OS=Homo sapiens GN=STAM PE=1 SV=3//0	GO:0005622	GO:0005515	GO:0006886
GOAT_ENSBTAP00000003492	8	6	3	182	211	194	0.959506	0.729119	0.409687	19.8717	22.8739	20.915	5.66667	195.667	0.699437	21.2202	4.9231	2.15e-26	2.58e-24	KCTD10	sp|Q9H3F6|BACD3_HUMAN BTB/POZ domain-containing adapter for CUL3-mediated RhoA degradation protein 3 OS=Homo sapiens GN=KCTD10 PE=1 SV=1//0	GO:0005737//GO:0005634	GO:0005515	GO:0051260
GOAT_ENSBTAP00000003501	68	70	53	873	985	1065	3.93956	4.1089	3.49613	46.0423	51.5791	55.4608	63.6667	974.333	3.8482	51.0274	3.72902	1.24e-35	4.87e-33	ATP6V1A	sp|P31404|VATA_BOVIN V-type proton ATPase catalytic subunit A OS=Bos taurus GN=ATP6V1A PE=2 SV=2//0
GOAT_ENSBTAP00000003514	4912	4640	3567	2821	2800	3110	2258.36	2161.43	1867.29	1180.71	1163.57	1285.27	4373	2910.33	2095.69	1209.85	-0.792602	2.64e-13	3.9e-12	Nedd8	sp|Q71UE8|NEDD8_RAT NEDD8 OS=Rattus norvegicus GN=Nedd8 PE=1 SV=1//2.85602e-24	--	GO:0005515	--
GOAT_ENSBTAP00000003517	59	49	26	808	988	630	7.32122	6.16051	3.67348	91.2741	110.812	70.27	44.6667	808.667	5.7184	90.7854	3.98878	3.81e-17	1.11e-15	INA	sp|Q16352|AINX_HUMAN Alpha-internexin OS=Homo sapiens GN=INA PE=1 SV=2//3.07776e-153	GO:0005883//GO:0005882	GO:0005198//GO:0005515	GO:0007399//GO:0045104//GO:0060052//GO:0030154//GO:0007275
GOAT_ENSBTAP00000003544	877	1235	824	421	410	479	148.352	211.665	158.706	64.8306	62.6868	72.8327	978.667	436.667	172.908	66.7834	-1.37244	1e-07	5.36e-07		sp|Q32KX8|CP013_BOVIN UPF0585 protein C16orf13 homolog OS=Bos taurus PE=2 SV=1//5.78708e-16
GOAT_ENSBTAP00000003545	2984	2948	2753	2135	2148	2274	337.574	337.899	354.609	219.873	219.636	231.237	2895	2185.67	343.36	223.582	-0.618918	1.79e-10	1.57e-09	EIF3G	sp|Q3ZC12|EIF3G_BOVIN Eukaryotic translation initiation factor 3 subunit G OS=Bos taurus GN=EIF3G PE=2 SV=1//1.41474e-14	GO:0005737//GO:0005852	GO:0005515//GO:0000166//GO:0017091//GO:0003723//GO:0003676//GO:0003743	GO:0006413//GO:0006412
GOAT_ENSBTAP00000003585	1075	1410	1268	692	605	562	107.986	143.506	145.028	63.2808	54.9307	50.7452	1251	619.667	132.174	56.3189	-1.23074	1.39e-08	8.73e-08	IGFLR1	sp|A5PJC7|IGFR1_BOVIN IGF-like family receptor 1 OS=Bos taurus GN=IGFLR1 PE=2 SV=1//7.91578e-33	GO:0016021//GO:0016020//GO:0005886	GO:0004872//GO:0005515	--
GOAT_ENSBTAP00000003609-D2	3144	3115	2859	2177	2159	2093	333.576	334.857	345.382	210.269	207.045	199.609	3039.33	2143	337.938	205.641	-0.716634	7.2e-12	8.19e-11	cops5	sp|Q6P635|CSN5_XENTR COP9 signalosome complex subunit 5 OS=Xenopus tropicalis GN=cops5 PE=2 SV=1//2.82134e-07	GO:0005737//GO:0005634//GO:0008180	GO:0005515//GO:0008237	GO:0051726//GO:0000338//GO:0045944//GO:0046328//GO:0010388
GOAT_ENSBTAP00000003619	99	52	31	394	431	479	6.1212	3.25757	2.18241	22.177	24.0867	26.6216	60.6667	434.667	3.85372	24.2951	2.65634	3.65e-14	6.33e-13	SEMA6B	sp|Q9H3T3|SEM6B_HUMAN Semaphorin-6B OS=Homo sapiens GN=SEMA6B PE=1 SV=4//0	GO:0016021//GO:0016020	GO:0030215//GO:0004872//GO:0005515	GO:0007275
GOAT_ENSBTAP00000003636	3150	3301	3360	2099	1914	1972	453.67	481.686	550.988	275.199	249.156	255.29	3270.33	1995	495.448	259.882	-0.930879	7.55e-13	1.03e-11	PSMA3	sp|Q58DU5|PSA3_BOVIN Proteasome subunit alpha type-3 OS=Bos taurus GN=PSMA3 PE=1 SV=3//2.50231e-172	GO:0005737//GO:0005839//GO:0019773//GO:0005634//GO:0000502	GO:0004175//GO:0016787//GO:0004298//GO:0005515//GO:0008233	GO:0051603//GO:0006511//GO:0006508
GOAT_ENSBTAP00000003725	7870	8881	6978	5264	5053	5291	931.453	1064.97	940.352	567.162	540.549	562.888	7909.67	5202.67	978.925	556.866	-0.813868	1.31e-13	2.07e-12	COPS6	sp|A7TX81|CSN6_PIG COP9 signalosome complex subunit 6 OS=Sus scrofa GN=COPS6 PE=2 SV=1//3.46003e-52	GO:0005634//GO:0008180	GO:0005515	GO:0010388
GOAT_ENSBTAP00000003797	13	15	10	233	220	161	1.29861	1.51815	1.13739	21.1883	19.8635	14.4563	12.6667	204.667	1.31805	18.5027	3.81126	1.55e-19	6.68e-18	CX3CR1	sp|A6QNL7|CX3C1_BOVIN CX3C chemokine receptor 1 OS=Bos taurus GN=CX3CR1 PE=2 SV=1//0	GO:0016021//GO:0016020//GO:0005886	GO:0005515//GO:0004930//GO:0004950//GO:0004871//GO:0004872//GO:0004896	GO:0002282//GO:0070098//GO:0019221//GO:0043066//GO:0007165//GO:0048246//GO:0007186//GO:0021795//GO:0016525
GOAT_ENSBTAP00000003832	6553	6465	5611	4509	4440	5118	1654.93	1654.24	1613.45	1036.63	1013.5	1161.82	6209.67	4689	1640.87	1070.65	-0.615976	1.15e-10	1.04e-09	ATP5G3	sp|Q3ZC75|AT5G3_BOVIN ATP synthase lipid-binding protein, mitochondrial OS=Bos taurus GN=ATP5G3 PE=2 SV=1//2.42924e-76	GO:0045263//GO:0016020//GO:0005739//GO:0031966//GO:0016021//GO:0033177	GO:0008289//GO:0015078	GO:0015986//GO:0015992//GO:0015991//GO:0006811//GO:0006810
GOAT_ENSBTAP00000003902	3759	4062	4105	2245	2007	2074	1104.95	1209.76	1373.9	600.745	533.231	547.994	3975.33	2108.67	1229.54	560.657	-1.13292	4.09e-13	5.86e-12	Anapc15	sp|D3ZQX4|APC15_RAT Anaphase-promoting complex subunit 15 OS=Rattus norvegicus GN=Anapc15 PE=3 SV=1//2.02919e-07	GO:0005622//GO:0005680	--	GO:0090266//GO:0007049//GO:0007067//GO:0051301
GOAT_ENSBTAP00000003991	570	285	285	1913	2128	1999	69.5275	35.2221	39.5822	212.423	234.613	219.176	380	2013.33	48.1106	222.071	2.20659	1.09e-12	1.45e-11	MSMO1	sp|Q5R574|MSMO1_PONAB Methylsterol monooxygenase 1 OS=Pongo abelii GN=MSMO1 PE=2 SV=1//0	GO:0016021//GO:0016020	GO:0008395//GO:0005506//GO:0016491	GO:0006633//GO:0008203//GO:0055114
GOAT_ENSBTAP00000004047	135	70	58	462	377	372	9.64404	5.06655	4.71766	30.045	24.3425	23.8873	87.6667	403.667	6.47608	26.0916	2.01039	1.58e-07	8.17e-07	THUMPD3	sp|Q2T9W2|THUM3_BOVIN THUMP domain-containing protein 3 OS=Bos taurus GN=THUMPD3 PE=2 SV=1//5.37886e-08	--	GO:0003723	--
GOAT_ENSBTAP00000004062	16	4	4	161	200	166	2.55015	0.645945	0.725905	23.3602	28.8121	23.7822	8	175.667	1.30733	25.3182	4.27547	9.96e-21	5.26e-19	HIATL1	sp|A4IF94|HIAL1_BOVIN Hippocampus abundant transcript-like protein 1 OS=Bos taurus GN=HIATL1 PE=2 SV=1//2.30371e-137	GO:0016021//GO:0016020//GO:0005886	GO:0005215	GO:0006810//GO:0055085
GOAT_ENSBTAP00000004109	199	110	135	941	1164	1132	21.6913	12.1483	16.7548	93.3743	114.679	110.912	148	1079	16.8648	106.322	2.65635	2.7e-18	9.58e-17	CRYZ	sp|O97764|QOR_BOVIN Zeta-crystallin OS=Bos taurus GN=CRYZ PE=2 SV=2//0
GOAT_ENSBTAP00000004114	197	159	146	908	986	962	9.29569	7.60154	7.84407	39.0037	42.0525	40.8027	167.333	952	8.2471	40.6196	2.30022	6.76e-13	9.29e-12	HNRNPUL1	sp|Q9BUJ2|HNRL1_HUMAN Heterogeneous nuclear ribonucleoprotein U-like protein 1 OS=Homo sapiens GN=HNRNPUL1 PE=1 SV=2//3.45882e-14	GO:0005634	GO:0019899//GO:0003676//GO:0005515	--
GOAT_ENSBTAP00000004161	18738	20894	19951	10359	8847	9304	5419.14	6122.35	6569.7	2727.28	2312.61	2418.66	19861	9503.33	6037.06	2486.18	-1.27991	1.85e-15	4.01e-14	RPL35	sp|Q3MHM7|RL35_BOVIN 60S ribosomal protein L35 OS=Bos taurus GN=RPL35 PE=2 SV=3//5.63825e-10	GO:0005840//GO:0030529//GO:0005622	GO:0003735	GO:0006412
GOAT_ENSBTAP00000004167	90	60	43	355	425	473	36.6766	24.7735	19.9521	131.698	156.543	173.263	64.3333	417.667	27.134	153.835	2.50321	1.75e-12	2.22e-11	Blcap	sp|P62950|BLCAP_RAT Bladder cancer-associated protein OS=Rattus norvegicus GN=Blcap PE=2 SV=1//6.69289e-57	GO:0016021//GO:0016020	GO:0005515//GO:0003674	GO:0006915//GO:0008150//GO:0007049
GOAT_ENSBTAP00000004187	75	42	29	335	346	330	14.8598	8.43119	6.54217	60.4227	61.962	58.7709	48.6667	337	9.94437	60.3852	2.60224	1.9e-12	2.4e-11	CCDC115	sp|Q3SZB5|CC115_BOVIN Coiled-coil domain-containing protein 115 OS=Bos taurus GN=CCDC115 PE=2 SV=1//6.00408e-16	GO:0005764//GO:0005768	--	--
GOAT_ENSBTAP00000004190	12561	12518	12950	7190	6160	6244	3288.01	3319.96	3859.68	1713.33	1457.43	1469.16	12676.3	6531.33	3489.22	1546.64	-1.17376	3.1e-18	1.09e-16	RPL23	sp|Q5REU2|RL23_PONAB 60S ribosomal protein L23 OS=Pongo abelii GN=RPL23 PE=2 SV=1//1.24391e-31	GO:0005737//GO:0005840//GO:0022625//GO:0005730//GO:0030529	GO:0003735//GO:0005515	GO:0006412
GOAT_ENSBTAP00000004227	1876	1871	1719	1204	1034	1310	622.928	629.46	649.912	363.946	310.331	390.998	1822	1182.67	634.1	355.091	-0.83652	2.31e-13	3.45e-12	TBCA	sp|P48427|TBCA_BOVIN Tubulin-specific chaperone A OS=Bos taurus GN=TBCA PE=1 SV=3//4.09157e-09	GO:0005737//GO:0015630//GO:0005730//GO:0005829//GO:0005856//GO:0005874	GO:0051082	GO:0007021//GO:0007023
GOAT_ENSBTAP00000004231	35	31	28	763	814	763	1.77532	1.59316	1.61712	35.2321	37.3193	34.7882	31.3333	780	1.66187	35.7799	4.42827	8.31e-45	9.78e-42	ADD3	sp|Q9UEY8|ADDG_HUMAN Gamma-adducin OS=Homo sapiens GN=ADD3 PE=1 SV=1//0
GOAT_ENSBTAP00000004373	67	22	42	417	409	436	7.7258	2.57028	5.51431	43.7733	42.6276	45.1911	43.6667	420.667	5.27013	43.864	3.05713	5.98e-19	2.38e-17	Jkamp	sp|Q8BI36|JKAMP_MOUSE JNK1/MAPK8-associated membrane protein OS=Mus musculus GN=Jkamp PE=1 SV=2//0	--	GO:0031625	GO:0030433
GOAT_ENSBTAP00000004389	88	46	29	295	309	383	26.0811	13.8131	9.78622	79.5922	82.7754	102.033	54.3333	329	16.5601	88.1335	2.41198	1.47e-09	1.09e-08	SUPT4H1	sp|Q4R941|SPT4H_MACFA Transcription elongation factor SPT4 OS=Macaca fascicularis GN=SUPT4H1 PE=3 SV=1//7.09642e-08	GO:0005634//GO:0032044	GO:0005515//GO:0046872//GO:0046982//GO:0008270	GO:0034244//GO:0000122//GO:0032785//GO:0032786//GO:0006355//GO:0045944//GO:0006351//GO:0006368
GOAT_ENSBTAP00000004397	21	4	6	217	147	173	1.62655	0.313904	0.529142	15.3007	10.2912	12.0446	10.3333	179	0.823199	12.5455	3.92979	2.08e-17	6.41e-16	GABRA5	sp|Q08E50|GBRA5_BOVIN Gamma-aminobutyric acid receptor subunit alpha-5 OS=Bos taurus GN=GABRA5 PE=2 SV=1//0	GO:0030425//GO:0034707//GO:0030054//GO:0016021//GO:0016020//GO:0044297//GO:0045211//GO:0005886//GO:0045202	GO:0004872//GO:0005230//GO:0004890//GO:0005254//GO:0005216	GO:0006821//GO:0043526//GO:0001662//GO:0090102//GO:0060384//GO:0007214//GO:0048666//GO:0007605//GO:0006811//GO:0006810//GO:0008306//GO:0060119
GOAT_ENSBTAP00000004411	43	110	60	449	519	491	3.13424	8.12355	4.97953	29.7931	34.1925	32.1694	71	486.333	5.41244	32.0516	2.56605	4.2e-14	7.21e-13	Padi2	sp|P20717|PADI2_RAT Protein-arginine deiminase type-2 OS=Rattus norvegicus GN=Padi2 PE=1 SV=1//0	GO:0005737	GO:0004668//GO:0005509	GO:0006464//GO:0018101
GOAT_ENSBTAP00000004431	2262	1988	2021	1638	1397	1493	284.627	253.449	289.55	187.63	158.884	168.866	2090.33	1509.33	275.875	171.793	-0.683343	3.02e-11	3.06e-10	ESD	sp|Q08E20|ESTD_BOVIN S-formylglutathione hydrolase OS=Bos taurus GN=ESD PE=2 SV=1//1.38574e-06	GO:0005737//GO:0005794//GO:0016023//GO:0031410//GO:0005634	GO:0016787//GO:0016788//GO:0004091//GO:0018738//GO:0008236	GO:0046294//GO:0006508
GOAT_ENSBTAP00000004510	1303	1579	1798	813	1090	959	69.2261	84.9956	108.765	39.3206	52.3421	45.7975	1560	954	87.6622	45.8201	-0.935974	5.22e-05	0.000173277	SLC5A11	sp|Q3ZC26|SC5AB_BOVIN Sodium/myo-inositol cotransporter 2 OS=Bos taurus GN=SLC5A11 PE=2 SV=1//0	GO:0016020//GO:0016021	GO:0015293//GO:0005215	GO:0006915//GO:0006811//GO:0006810//GO:0008643//GO:0006814//GO:0055085
GOAT_ENSBTAP00000004526	2912	3000	2819	1692	1461	1544	656.785	685.555	723.936	347.406	297.839	313.024	2910.33	1565.67	688.759	319.423	-1.10853	4.77e-18	1.63e-16		sp|Q32P66|CA123_BOVIN UPF0587 protein C1orf123 homolog OS=Bos taurus PE=2 SV=1//4.08013e-113
GOAT_ENSBTAP00000004549	52	33	39	331	324	308	3.19315	2.05314	2.7268	18.5033	17.9829	17.0006	41.3333	321	2.6577	17.8289	2.74597	6.9e-14	1.14e-12	SACM1L	sp|A6QL88|SAC1_BOVIN Phosphatidylinositide phosphatase SAC1 OS=Bos taurus GN=SACM1L PE=2 SV=1//2.39854e-28	GO:0005794//GO:0032281//GO:0005783//GO:0016021//GO:0016020//GO:0005789	GO:0016787//GO:0042578//GO:0016791	GO:0016311//GO:0008150
GOAT_ENSBTAP00000004617	91	31	40	468	462	435	10.2623	3.54203	5.13612	48.0455	47.0915	44.095	54	455	6.31347	46.4107	2.87795	4.06e-17	1.17e-15		sp|Q2HJH3|CK054_BOVIN Ester hydrolase C11orf54 homolog OS=Bos taurus PE=2 SV=1//4.71482e-11	GO:0005634	GO:0016787//GO:0016788//GO:0008270//GO:0005515//GO:0046872	--
GOAT_ENSBTAP00000004736	34	11	22	266	254	239	2.59424	0.85038	1.91129	18.4764	17.5172	16.3918	22.3333	253	1.7853	17.4618	3.28996	2.36e-17	7.18e-16	CYP39A1	sp|Q9NYL5|CP39A_HUMAN 24-hydroxycholesterol 7-alpha-hydroxylase OS=Homo sapiens GN=CYP39A1 PE=2 SV=2//3.7386e-09	--	GO:0004497//GO:0020037//GO:0016705//GO:0008396//GO:0005506//GO:0046872//GO:0008387//GO:0009055	GO:0006707//GO:0006699//GO:0055114
GOAT_ENSBTAP00000004751	6756	6550	7895	5142	5468	5413	1193.5	1172.37	1588.03	826.932	873.093	859.546	7067	5341	1317.97	853.19	-0.627373	5.44e-06	2.14e-05	PRDX1	sp|Q5E947|PRDX1_BOVIN Peroxiredoxin-1 OS=Bos taurus GN=PRDX1 PE=2 SV=1//4.16939e-146	GO:0005737//GO:0042470//GO:0005634//GO:0005739	GO:0016209//GO:0005515//GO:0042802//GO:0008379//GO:0004601//GO:0051920//GO:0016491	GO:0034101//GO:0042345//GO:0008283//GO:0042267//GO:0000302//GO:0032872//GO:0019430//GO:0042744//GO:0006979//GO:0055114
GOAT_ENSBTAP00000004768	55	14	21	309	340	298	0.599327	0.154568	0.260552	3.06524	3.34872	2.91887	30	315.667	0.338149	3.11095	3.20162	3.98e-18	1.38e-16	Reln	sp|Q60841|RELN_MOUSE Reelin OS=Mus musculus GN=Reln PE=1 SV=3//8.98854e-06	GO:0030425//GO:0005737//GO:0005615//GO:0005576//GO:0005578	GO:0008236//GO:0046872//GO:0016787//GO:0070325//GO:0070326//GO:0005515//GO:0008233	GO:0038026//GO:0021517//GO:0021511//GO:0016358//GO:0018108//GO:0001764//GO:0010001//GO:0007411//GO:0007275//GO:0048265//GO:0000904//GO:0021987//GO:0006508//GO:0007417//GO:0051057//GO:0014068//GO:0007155//GO:0045860//GO:0007420//GO:0050731//GO:0032008//GO:0021800
GOAT_ENSBTAP00000004805	43	29	24	237	256	246	2.95978	2.02245	1.88094	14.8506	15.9269	15.2203	32	246.333	2.28773	15.3326	2.74462	2.93e-12	3.58e-11	FOXK2	sp|Q01167|FOXK2_HUMAN Forkhead box protein K2 OS=Homo sapiens GN=FOXK2 PE=1 SV=3//3.58164e-18	GO:0043231//GO:0005634	GO:0043565//GO:0003700//GO:0000287//GO:0005515//GO:0003677	GO:0006355//GO:0006351
GOAT_ENSBTAP00000004831	14	12	12	249	241	277	0.654578	0.568465	0.638834	10.5983	10.1847	11.6416	12.6667	255.667	0.620626	10.8082	4.12226	6.87e-25	7.13e-23	sec23a	sp|Q05AS9|SC23A_XENTR Protein transport protein Sec23A OS=Xenopus tropicalis GN=sec23a PE=2 SV=1//1.12128e-15	GO:0005794//GO:0016020//GO:0000139//GO:0030868//GO:0048471//GO:0030127//GO:0005783	GO:0008270//GO:0005515	GO:0006810//GO:0006888//GO:0016192//GO:0006886//GO:0015031
GOAT_ENSBTAP00000004836	63	74	59	713	685	620	2.65173	3.15581	2.82758	27.3202	26.0603	23.4574	65.3333	672.667	2.87837	25.6126	3.15353	1.54e-23	1.28e-21	EPAS1	sp|Q99814|EPAS1_HUMAN Endothelial PAS domain-containing protein 1 OS=Homo sapiens GN=EPAS1 PE=1 SV=3//0	GO:0005737//GO:0005634//GO:0005667	GO:0001077//GO:0004871//GO:0003677//GO:0043565//GO:0005515//GO:0008134//GO:0035035//GO:0003700//GO:0046983//GO:0046982	GO:0030324//GO:0030154//GO:0048469//GO:0007165//GO:0001666//GO:0007005//GO:0001525//GO:0006355//GO:0043619//GO:0002027//GO:0043129//GO:0030218//GO:0007601//GO:0048625//GO:0042415//GO:0001892//GO:0006979//GO:0001974//GO:0045944//GO:0006351//GO:0030097
GOAT_ENSBTAP00000004844	153	61	90	499	397	426	38.1029	15.3917	25.5201	113.128	89.3627	95.3617	101.333	440.667	26.3382	99.2843	1.91441	5.15e-07	2.44e-06	CHST1	sp|O43916|CHST1_HUMAN Carbohydrate sulfotransferase 1 OS=Homo sapiens GN=CHST1 PE=1 SV=1//3.5693e-98	GO:0000139	GO:0045130//GO:0008146	GO:0005975//GO:0006012//GO:0006790//GO:0042339
GOAT_ENSBTAP00000004876	43	31	13	290	343	379	2.32586	1.69889	0.80063	14.2797	16.7691	18.4269	29	337.333	1.60846	16.4919	3.358	3.08e-20	1.49e-18	WDR48	sp|Q8TAF3|WDR48_HUMAN WD repeat-containing protein 48 OS=Homo sapiens GN=WDR48 PE=1 SV=1//0	GO:0005634//GO:0043231	GO:0005515	GO:0016579
GOAT_ENSBTAP00000004880	68	31	21	315	288	260	4.50755	2.08201	1.58498	19.0085	17.2553	15.4918	40	287.667	2.72485	17.2519	2.66251	3.72e-12	4.46e-11	CNOT2	sp|Q9NZN8|CNOT2_HUMAN CCR4-NOT transcription complex subunit 2 OS=Homo sapiens GN=CNOT2 PE=1 SV=1//3.0391e-10	GO:0005737//GO:0005634//GO:0030014	GO:0004535//GO:0005515	GO:0033147//GO:0001829//GO:0000122//GO:0010606//GO:0006355//GO:2000036
GOAT_ENSBTAP00000004937-D2	57	68	44	433	550	526	6.76857	8.18126	5.94906	46.8074	59.0315	56.1443	56.3333	503	6.9663	53.9944	2.95435	7.39e-19	2.88e-17	GNAO1	sp|P08239|GNAO_BOVIN Guanine nucleotide-binding protein G(o) subunit alpha OS=Bos taurus GN=GNAO1 PE=1 SV=4//1.40162e-23
GOAT_ENSBTAP00000004984	2925	3442	2826	1382	1428	1583	509.199	607.102	560.154	219.015	224.693	247.708	3064.33	1464.33	558.818	230.472	-1.27779	3.57e-16	8.71e-15	PSMB3	sp|P33672|PSB3_BOVIN Proteasome subunit beta type-3 OS=Bos taurus GN=PSMB3 PE=1 SV=3//4.05827e-152	GO:0005737//GO:0005839//GO:0005634//GO:0000502	GO:0004175//GO:0016787//GO:0004298//GO:0008233	GO:0051603//GO:0006508
GOAT_ENSBTAP00000005015	14346	16508	15029	6699	5666	6709	5592.06	6519.66	6670.29	2377.15	1996.26	2350.7	15294.3	6358	6260.67	2241.37	-1.48194	3.72e-17	1.08e-15	Rpl37a-ps1	sp|P61515|RL37P_RAT Putative 60S ribosomal protein L37a OS=Rattus norvegicus GN=Rpl37a-ps1 PE=5 SV=2//3.8778e-59	GO:0005622//GO:0005840//GO:0022625//GO:0030529	GO:0003735//GO:0046872	GO:0006412
GOAT_ENSBTAP00000005065	26	21	19	217	225	193	1.02125	0.835731	0.849738	7.7593	7.98803	6.81418	22	211.667	0.902239	7.5205	3.05925	5.69e-14	9.54e-13	FAM120B	sp|A6QNT4|F120B_BOVIN Constitutive coactivator of peroxisome proliferator-activated receptor gamma OS=Bos taurus GN=FAM120B PE=2 SV=1//8.81465e-155
GOAT_ENSBTAP00000005146	40	21	16	243	281	285	3.6687	1.95146	1.67088	20.2891	23.2947	23.4961	25.6667	269.667	2.43035	22.36	3.20168	7.15e-17	1.95e-15	PIP4K2C	sp|Q0P5F7|PI42C_BOVIN Phosphatidylinositol 5-phosphate 4-kinase type-2 gamma OS=Bos taurus GN=PIP4K2C PE=2 SV=1//1.29305e-13	GO:0005737//GO:0005634//GO:0016020	GO:0016301//GO:0016307//GO:0000166//GO:0016740//GO:0016309//GO:0042802//GO:0005524	GO:0016310//GO:0046488//GO:0046854
GOAT_ENSBTAP00000005166	27	16	19	403	474	416	0.961531	0.57731	0.770418	13.065	15.2573	13.3165	20.6667	431	0.769753	13.8796	4.17243	1.14e-32	2.88e-30	CCP110	sp|O43303|CP110_HUMAN Centriolar coiled-coil protein of 110 kDa OS=Homo sapiens GN=CCP110 PE=1 SV=3//0	GO:0005813//GO:0005814	GO:0005515	GO:0051298//GO:0007099//GO:0032465
GOAT_ENSBTAP00000005265	10	2	5	149	136	108	0.408912	0.0828607	0.232794	5.54652	5.02652	3.96964	5.66667	131	0.241522	4.84756	4.32703	1.63e-17	5.09e-16	POLK	sp|Q9UBT6|POLK_HUMAN DNA polymerase kappa OS=Homo sapiens GN=POLK PE=1 SV=1//0	GO:0005634	GO:0003887//GO:0003677//GO:0003684	GO:0006297//GO:0006281
GOAT_ENSBTAP00000005280	91	143	88	982	884	881	6.85588	10.9156	7.5488	67.3501	60.1968	59.6617	107.333	915.667	8.44009	62.4029	2.88628	3.46e-21	1.93e-19	ABAT	sp|P80147|GABT_PIG 4-aminobutyrate aminotransferase, mitochondrial OS=Sus scrofa GN=ABAT PE=1 SV=2//0	GO:0032144//GO:0005739	GO:0003824//GO:0008483//GO:0042803//GO:0003867//GO:0030170	GO:0009448//GO:0048148
GOAT_ENSBTAP00000005281	36	26	14	218	253	179	1.86833	1.36714	0.82728	10.2994	11.8678	8.3503	25.3333	216.667	1.35425	10.1725	2.90911	1e-12	1.34e-11	DHX35	sp|Q9H5Z1|DHX35_HUMAN Probable ATP-dependent RNA helicase DHX35 OS=Homo sapiens GN=DHX35 PE=1 SV=2//0	GO:0071013	GO:0016787//GO:0008026//GO:0004386//GO:0003676//GO:0000166//GO:0005524	--
GOAT_ENSBTAP00000005327	88	73	35	1334	1658	1694	14.4101	12.1115	6.52569	198.859	245.397	249.342	65.3333	1562	11.0158	231.199	4.3915	7.04e-46	9.95e-43	Ywhag	sp|P61983|1433G_RAT 14-3-3 protein gamma OS=Rattus norvegicus GN=Ywhag PE=1 SV=2//1.03915e-152	--	GO:0005080//GO:0005159//GO:0019904//GO:0005515	GO:0006605//GO:0045664//GO:0048167
GOAT_ENSBTAP00000005354	56	25	25	254	174	294	4.54354	2.05511	2.30951	18.7605	12.7601	21.4413	35.3333	240.667	2.96939	17.654	2.57176	2.63e-06	1.1e-05		sp|A3KMX8|CF211_BOVIN UPF0364 protein C6orf211 homolog OS=Bos taurus PE=2 SV=1//0
GOAT_ENSBTAP00000005375	1093	1169	1146	717	596	555	221.45	239.971	264.371	132.245	109.144	101.076	1136	622.667	241.931	114.155	-1.0836	7.73e-15	1.49e-13	GAMT	sp|Q2TBQ3|GAMT_BOVIN Guanidinoacetate N-methyltransferase OS=Bos taurus GN=GAMT PE=2 SV=1//2.97974e-06	--	GO:0030731//GO:0016740//GO:0008168	GO:0009887//GO:0040014//GO:0006601//GO:0007283//GO:0032259
GOAT_ENSBTAP00000005488	110	90	82	470	388	399	3.10612	2.57488	2.63641	12.0817	9.90276	10.1274	94	419	2.77247	10.7039	1.9489	2.88e-07	1.43e-06	ARHGAP29	sp|A7YY57|RHG29_BOVIN Rho GTPase-activating protein 29 OS=Bos taurus GN=ARHGAP29 PE=2 SV=1//0	GO:0005622	GO:0005096//GO:0005515//GO:0046872	GO:0043547//GO:0007165//GO:0035556
GOAT_ENSBTAP00000005489	40	46	57	280	319	289	2.8182	3.28366	4.57256	17.9587	20.3143	18.3024	47.6667	296	3.55814	18.8584	2.40601	1.55e-10	1.37e-09	VEZF1	sp|Q14119|VEZF1_HUMAN Vascular endothelial zinc finger 1 OS=Homo sapiens GN=VEZF1 PE=1 SV=2//1.23384e-156	GO:0005634//GO:0005622	GO:0046872//GO:0008270//GO:0003676	GO:0006355//GO:0001885//GO:0001525
GOAT_ENSBTAP00000005523	2425	2389	2564	1169	767	1086	533.523	532.533	642.292	234.132	152.523	214.768	2459.33	1007.33	569.45	200.474	-1.50615	5.51e-18	1.86e-16	RARRES2	sp|Q29RS5|RARR2_BOVIN Retinoic acid receptor responder protein 2 OS=Bos taurus GN=RARRES2 PE=2 SV=1//2.92004e-36	GO:0031012//GO:0005576	GO:0005102//GO:0005515	GO:0001701//GO:0048566//GO:0050873//GO:0010759//GO:0001523
GOAT_ENSBTAP00000005590	1312	1358	1135	860	770	850	248.944	261.07	245.209	148.549	132.056	144.972	1268.33	826.667	251.741	141.859	-0.827481	5.24e-13	7.33e-12	TRAPPC5	sp|Q8IUR0|TPPC5_HUMAN Trafficking protein particle complex subunit 5 OS=Homo sapiens GN=TRAPPC5 PE=1 SV=1//1.44678e-120	GO:0030008	GO:0005515	--
GOAT_ENSBTAP00000005603	120	62	55	635	668	644	11.2067	5.86649	5.84836	53.9854	56.3863	54.0607	79	649	7.64053	54.8108	2.84272	1.26e-18	4.73e-17	APMAP	sp|Q3T0E5|APMAP_BOVIN Adipocyte plasma membrane-associated protein OS=Bos taurus GN=APMAP PE=2 SV=1//1.12717e-17	GO:0016021//GO:0016020//GO:0009986	GO:0016844//GO:0004064	GO:0009058
GOAT_ENSBTAP00000005615	12	21	8	286	279	221	0.434247	0.769952	0.329624	9.42163	9.12554	7.18862	13.6667	262	0.511274	8.5786	4.06857	1.48e-24	1.48e-22	PPFIBP1	sp|Q86W92|LIPB1_HUMAN Liprin-beta-1 OS=Homo sapiens GN=PPFIBP1 PE=1 SV=2//2.41424e-10	--	GO:0005515	--
GOAT_ENSBTAP00000005628	3242	3257	2579	2037	2112	2261	740.53	753.766	670.74	423.57	436.036	464.224	3026	2136.67	721.678	441.277	-0.709672	7.01e-12	8.01e-11	NDUFA8	sp|P42029|NDUA8_BOVIN NADH dehydrogenase [ubiquinone] 1 alpha subcomplex subunit 8 OS=Bos taurus GN=NDUFA8 PE=1 SV=2//8.23263e-25	GO:0005739//GO:0005743//GO:0005747//GO:0005758//GO:0070469	--	GO:0022900
GOAT_ENSBTAP00000005683	1712	2029	1534	1049	1019	1312	223.254	268.082	227.769	124.531	120.107	153.79	1758.33	1126.67	239.702	132.809	-0.851884	1.03e-10	9.41e-10	CCS	sp|O14618|CCS_HUMAN Copper chaperone for superoxide dismutase OS=Homo sapiens GN=CCS PE=1 SV=1//0	GO:0005737//GO:0005634	GO:0005515//GO:0004784//GO:0046872	GO:0051353//GO:0030001//GO:0006801//GO:0055114
GOAT_ENSBTAP00000005688	1274	1719	1236	563	518	483	256.672	350.892	283.531	103.258	94.3274	87.469	1409.67	521.333	297.032	95.018	-1.64434	7.34e-11	6.88e-10	MRPL21	sp|Q2TBS2|RM21_BOVIN 39S ribosomal protein L21, mitochondrial OS=Bos taurus GN=MRPL21 PE=1 SV=1//2.46331e-08	GO:0005840//GO:0005739//GO:0005622	GO:0003735//GO:0003723	GO:0006412
GOAT_ENSBTAP00000005730	100	65	42	763	890	895	7.79599	5.13421	3.72815	54.1503	62.7134	62.718	69	849.333	5.55278	59.8605	3.43032	4.05e-29	6.97e-27	CS	sp|Q29RK1|CISY_BOVIN Citrate synthase, mitochondrial OS=Bos taurus GN=CS PE=1 SV=1//0	GO:0005739//GO:0005759	GO:0046912//GO:0004108//GO:0016740	GO:0044262//GO:0006099//GO:0005975
GOAT_ENSBTAP00000005733	2153	2238	1800	1076	949	1124	412.887	434.847	393.037	187.847	164.495	193.754	2063.67	1049.67	413.59	182.032	-1.18401	2.88e-19	1.19e-17	CNPY2	sp|Q9Y2B0|CNPY2_HUMAN Protein canopy homolog 2 OS=Homo sapiens GN=CNPY2 PE=1 SV=1//4.39532e-116	--	--	GO:0010629//GO:0010988//GO:0045716
GOAT_ENSBTAP00000005749	64	44	48	549	565	573	2.69383	1.87643	2.3004	21.0362	21.495	21.6791	52	562.333	2.29022	21.4034	3.22428	3.07e-23	2.44e-21	STAT2	sp|O02799|STAT2_PIG Signal transducer and activator of transcription 2 OS=Sus scrofa GN=STAT2 PE=2 SV=1//0	GO:0005737//GO:0005634//GO:0005886	GO:0005515//GO:0003700//GO:0004871//GO:0005509	GO:0006355//GO:0007165
GOAT_ENSBTAP00000005789	16013	16804	12118	11158	11013	11406	1704.01	1811.76	1468.26	1080.91	1059.26	1091.01	14978.3	11192.3	1661.34	1077.06	-0.625248	5.26e-11	5.11e-10	NUDC	sp|Q17QG2|NUDC_BOVIN Nuclear migration protein nudC OS=Bos taurus GN=NUDC PE=2 SV=1//1.97211e-08	GO:0005737//GO:0005856//GO:0005634//GO:0005874	GO:0005515	GO:0007049//GO:0007067//GO:0051301
GOAT_ENSBTAP00000005982	122	125	92	600	552	451	15.3513	15.9361	13.1809	68.729	62.7801	51.0104	113	534.333	14.8228	60.8399	2.0372	1.46e-08	9.13e-08	TPM4	sp|P02561|TPM4_HORSE Tropomyosin alpha-4 chain OS=Equus caballus GN=TPM4 PE=1 SV=2//4.63172e-08	GO:0005737//GO:0001725//GO:0031941//GO:0002102//GO:0030863//GO:0005856	GO:0003779	GO:0006979
GOAT_ENSBTAP00000006007	162	121	153	614	896	737	10.7188	8.11156	11.5264	36.9831	53.5842	43.8324	145.333	749	10.1189	44.7999	2.14644	6.24e-08	3.46e-07	UGT8	sp|Q16880|CGT_HUMAN 2-hydroxyacylsphingosine 1-beta-galactosyltransferase OS=Homo sapiens GN=UGT8 PE=2 SV=2//7.68075e-07	--	GO:0016757//GO:0030246//GO:0016740//GO:0016758	GO:0007010//GO:0030913//GO:0008088//GO:0048812//GO:0002175//GO:0008152//GO:0005975//GO:0030259
GOAT_ENSBTAP00000006011	191	209	157	661	831	867	12.6609	14.0368	11.8496	39.8876	49.7888	51.6593	185.667	786.333	12.8491	47.1119	1.87442	1.16e-07	6.15e-07	LGI3	sp|Q4R4H3|LGI3_MACFA Leucine-rich repeat LGI family member 3 OS=Macaca fascicularis GN=LGI3 PE=2 SV=1//1.02614e-13	GO:0008021	GO:0005515	GO:0017157
GOAT_ENSBTAP00000006040	2987	2617	2219	2064	2009	2074	478.207	424.496	404.494	300.812	290.71	298.461	2607.67	2049	435.732	296.661	-0.554627	9.37e-10	7.24e-09	CCDC124	sp|Q2TBV6|CC124_BOVIN Coiled-coil domain-containing protein 124 OS=Bos taurus GN=CCDC124 PE=2 SV=1//6.1419e-18	--	GO:0005515	--
GOAT_ENSBTAP00000006057	1218	2009	1600	581	640	768	52.1233	87.1072	77.9612	22.6342	24.7551	29.5423	1609	663	72.3972	25.6439	-1.49732	7.31e-06	2.81e-05	Kif19	sp|Q99PT9|KIF19_MOUSE Kinesin-like protein KIF19 OS=Mus musculus GN=Kif19 PE=1 SV=2//4.73286e-07	GO:0005929//GO:0005874	GO:0008574//GO:0000166//GO:0003777//GO:0005524	GO:0060404//GO:0007018//GO:0070462
GOAT_ENSBTAP00000006115	39	13	17	212	219	212	5.70857	1.92795	2.83325	28.249	28.9738	27.8931	23	214.333	3.48992	28.372	3.0232	1.23e-13	1.95e-12	COQ10B	sp|Q9H8M1|CQ10B_HUMAN Coenzyme Q-binding protein COQ10 homolog B, mitochondrial OS=Homo sapiens GN=COQ10B PE=2 SV=1//9.10951e-152	GO:0005739	--	--
GOAT_ENSBTAP00000006139	300	141	112	1217	1360	1542	22.5544	10.7404	9.58742	83.2925	92.4163	104.206	184.333	1373	14.2941	93.305	2.70654	6.48e-17	1.79e-15	WARS	sp|P17248|SYWC_BOVIN Tryptophan--tRNA ligase, cytoplasmic OS=Bos taurus GN=WARS PE=1 SV=3//1.22256e-14	GO:0005737	GO:0000166//GO:0004812//GO:0005515//GO:0004830//GO:0016874//GO:0005524	GO:0006436//GO:0045765//GO:0006418//GO:0006412
GOAT_ENSBTAP00000006190	318	281	181	1078	1185	1207	126.711	113.444	82.118	391.03	426.78	432.306	260	1156.67	107.424	416.705	1.95571	7.4e-09	4.88e-08	Dynll2	sp|Q78P75|DYL2_RAT Dynein light chain 2, cytoplasmic OS=Rattus norvegicus GN=Dynll2 PE=1 SV=1//9.80965e-62	GO:0005737//GO:0005856//GO:0005813//GO:0016459//GO:0030286//GO:0005874//GO:0005875	GO:0003774//GO:0005515	GO:0007017//GO:0006810
GOAT_ENSBTAP00000006275	2409	987	1482	14762	13142	13266	928.93	385.614	650.68	5181.98	4580.43	4598.16	1626	13723.3	655.075	4786.86	2.86935	2.79e-26	3.27e-24	S100B	sp|P02638|S100B_BOVIN Protein S100-B OS=Bos taurus GN=S100B PE=1 SV=2//3.70655e-11	GO:0005737//GO:0001726//GO:0005634//GO:0048471//GO:0043025	GO:0048306//GO:0050786//GO:0008270//GO:0005509//GO:0046872//GO:0042802//GO:0042803//GO:0019210//GO:0048156//GO:0005515	GO:0016310//GO:0048143//GO:0007613//GO:0007611//GO:0048168//GO:0007409//GO:0042326//GO:0045917//GO:0006417//GO:0043123
GOAT_ENSBTAP00000006308	16	9	12	188	169	169	0.880038	0.501549	0.751512	9.41335	8.4017	8.35538	12.3333	175.333	0.711033	8.72347	3.61691	1.4e-16	3.64e-15	RRN3	sp|Q9NYV6|RRN3_HUMAN RNA polymerase I-specific transcription initiation factor RRN3 OS=Homo sapiens GN=RRN3 PE=1 SV=1//0	GO:0005730	GO:0070063//GO:0005488	GO:0001701//GO:0048872//GO:0008283//GO:0007028//GO:0042254//GO:0006361//GO:0043066//GO:0045893//GO:0006352//GO:2000142//GO:0007000
GOAT_ENSBTAP00000006381	1312	1349	1109	764	612	671	117.333	122.232	112.925	62.1989	49.4692	53.9393	1256.67	682.333	117.497	55.2025	-1.08981	4.33e-17	1.24e-15	PLEKHO1	sp|A4IFK0|PKHO1_BOVIN Pleckstrin homology domain-containing family O member 1 OS=Bos taurus GN=PLEKHO1 PE=2 SV=1//1.00761e-30	--	GO:0005543//GO:0005515	--
GOAT_ENSBTAP00000006413	212	131	58	1251	1092	1029	21.2364	13.2956	6.61527	114.08	98.8707	92.653	133.667	1124	13.7158	101.868	2.89279	1.4e-21	8.34e-20	Camkv	sp|Q3UHL1|CAMKV_MOUSE CaM kinase-like vesicle-associated protein OS=Mus musculus GN=Camkv PE=1 SV=2//0	GO:0005783//GO:0005886//GO:0005737//GO:0005634//GO:0016363//GO:0005911//GO:0043231//GO:0005829	GO:0008022//GO:0019899//GO:0004697//GO:0043560//GO:0000166//GO:0004674//GO:0016740//GO:0004713//GO:0004672//GO:0005524//GO:0004703//GO:0016301//GO:0046872//GO:0016772//GO:0004704//GO:0005515//GO:0008047	GO:0018107//GO:0050732//GO:0042119//GO:0016310//GO:0071260//GO:0034351//GO:0038032//GO:0043407//GO:0042742//GO:0035556//GO:0051490//GO:0043085//GO:0016064//GO:0046627//GO:0030837//GO:0043123//GO:0006468//GO:0006915//GO:0007165//GO:0032930//GO:0032613//GO:0042100//GO:0032615//GO:0090331//GO:0023021//GO:0006955//GO:2001022//GO:0035307//GO:0090398//GO:0007249//GO:2000753//GO:2000755//GO:2000304
GOAT_ENSBTAP00000006418	147	108	83	541	587	567	10.3366	7.69435	6.64523	34.6307	37.3075	35.8377	112.667	565	8.22538	35.9253	2.12684	1.64e-09	1.21e-08	Foxo4	sp|Q9WVH3|FOXO4_MOUSE Forkhead box protein O4 OS=Mus musculus GN=Foxo4 PE=1 SV=1//1.23933e-63	GO:0005737//GO:0005634//GO:0005829//GO:0005667	GO:0019899//GO:0001071//GO:0003677//GO:0003690//GO:0005515//GO:0043565//GO:0008134//GO:0008301//GO:0019901//GO:0003700//GO:0003705	GO:0000080//GO:0009790//GO:0007389//GO:0048863//GO:0048513//GO:0008285//GO:0008286//GO:0009888//GO:0007050//GO:0051151//GO:0045893//GO:0051090//GO:0006355//GO:0045944//GO:0006351//GO:0007095//GO:0016525
GOAT_ENSBTAP00000006478	1014	1397	1758	3234	3900	3982	185.667	227.62	255.364	467.479	566.876	582.548	1389.67	3705.33	222.884	538.968	1.27381	9.1883e-05	0.00080404	PENK	sp|P01211|PENK_BOVIN proenkephalin OS=Bos taurus GN=PENK PE=1 SV=1//2.3312e-151	GO:0007218//GO:0007610//GO:0042742//GO:0019233//GO:0001662	GO:0005576	GO:0001515
GOAT_ENSBTAP00000006575	63	18	22	256	226	238	11.8287	3.42419	4.70318	43.7563	38.3533	40.1671	34.3333	240	6.65201	40.7589	2.61525	6.86e-11	6.48e-10	FAM206A	sp|Q29S16|F206A_BOVIN Protein FAM206A OS=Bos taurus GN=FAM206A PE=2 SV=1//4.30831e-121	GO:0005960	--	GO:0006546
GOAT_ENSBTAP00000006593	593	243	384	2061	1833	1685	51.868	21.5348	38.2428	164.107	144.913	132.478	406.667	1859.67	37.2152	147.166	1.98348	8.48e-10	6.6e-09	WSB1	sp|Q9Y6I7|WSB1_HUMAN WD repeat and SOCS box-containing protein 1 OS=Homo sapiens GN=WSB1 PE=1 SV=1//0	GO:0016020//GO:0005886//GO:0030425//GO:0005634//GO:0005737//GO:0048471//GO:0043025//GO:0005856//GO:0042995//GO:0043204//GO:0001891//GO:0030496//GO:0005622	GO:0042169//GO:0030971//GO:0005080//GO:0019903//GO:0030292//GO:0008200//GO:0008656//GO:0005515	GO:0032436//GO:0030308//GO:0001934//GO:0032464//GO:0051898//GO:0035556//GO:0030178//GO:0007049//GO:0032880//GO:0050765//GO:0043547//GO:0040008//GO:0007369//GO:0007275//GO:0043065//GO:0048511//GO:0030335//GO:0006919//GO:0006915//GO:0051302//GO:0061099//GO:0051726//GO:2000543//GO:0006417//GO:2000114
GOAT_ENSBTAP00000006615	2	4	4	133	116	143	0.0880038	0.178328	0.200403	5.32755	4.61348	5.65595	3.33333	130.667	0.155578	5.19899	5.06252	5.79e-21	3.12e-19	FAM91A1	sp|Q658Y4|F91A1_HUMAN Protein FAM91A1 OS=Homo sapiens GN=FAM91A1 PE=1 SV=3//2.15284e-08
GOAT_ENSBTAP00000006628	72	52	51	265	271	303	7.44101	5.44493	6.00127	24.9316	25.3144	28.1475	58.3333	279.667	6.29574	26.1312	2.05333	3.45e-07	1.69e-06	DOC2A	sp|Q14183|DOC2A_HUMAN Double C2-like domain-containing protein alpha OS=Homo sapiens GN=DOC2A PE=1 SV=5//0	GO:0008021//GO:0016020//GO:0005622//GO:0043005//GO:0031045//GO:0048471//GO:0043025	GO:0005515//GO:0005215//GO:0005096//GO:0005543//GO:0046982	GO:0006810//GO:0051056//GO:0017158//GO:0007165//GO:0035556//GO:0043547
GOAT_ENSBTAP00000006653	690	823	803	298	353	409	118.964	143.766	157.636	46.7721	55.0097	63.3851	772	353.333	140.122	55.0556	-1.34772	1.23e-10	1.1e-09	TIMP1	sp|P50122|TIMP1_SHEEP Metalloproteinase inhibitor 1 OS=Ovis aries GN=TIMP1 PE=2 SV=1//7.2373e-152	GO:0005604//GO:0031012//GO:0005576//GO:0009986//GO:0005578	GO:0005178//GO:0008047//GO:0005515//GO:0008191//GO:0004857//GO:0046872	GO:0008285//GO:0051045//GO:0030814//GO:0043086//GO:0045664//GO:0071310//GO:0043249//GO:0043085//GO:0043408
GOAT_ENSBTAP00000006736	21	14	12	260	311	343	0.542965	0.36675	0.35327	6.11971	7.26795	7.97158	15.6667	304.667	0.420995	7.11975	4.07995	9.24e-27	1.17e-24	SLIT2	sp|O94813|SLIT2_HUMAN Slit homolog 2 protein OS=Homo sapiens GN=SLIT2 PE=1 SV=1//8.1773e-66
GOAT_ENSBTAP00000006777	36	19	20	310	278	285	2.69523	1.44124	1.70489	21.1281	18.8121	19.1795	25	291	1.94712	19.7065	3.33926	6.06e-19	2.41e-17	ABI1	sp|Q8IZP0|ABI1_HUMAN Abl interactor 1 OS=Homo sapiens GN=ABI1 PE=1 SV=4//0
GOAT_ENSBTAP00000006789	188	85	111	813	824	826	15.6064	7.14913	10.4916	61.4385	61.8261	61.6344	128	821	11.0824	61.633	2.47543	9.71e-15	1.85e-13	Apcdd1	sp|Q3U128|APCD1_MOUSE Protein APCDD1 OS=Mus musculus GN=Apcdd1 PE=2 SV=1//0	GO:0005887	GO:0017147	GO:0001942//GO:0043615//GO:0030178
GOAT_ENSBTAP00000006848	102	129	77	550	654	627	2.50711	3.21257	2.15495	12.3067	14.5295	13.8529	102.667	610.333	2.62488	13.563	2.36936	1.69e-12	2.16e-11	BAZ1B	sp|Q9UIG0|BAZ1B_HUMAN Tyrosine-protein kinase BAZ1B OS=Homo sapiens GN=BAZ1B PE=1 SV=2//0	GO:0005721//GO:0005634//GO:0000793//GO:0016585//GO:0043596//GO:0071778	GO:0005488//GO:0042393//GO:0008270//GO:0070577//GO:0004713//GO:0046872//GO:0071884//GO:0042809//GO:0035173//GO:0005515//GO:0003682//GO:0032947	GO:0034725//GO:0006302//GO:0043044//GO:0016572//GO:0048096//GO:0003007//GO:0006338//GO:0006337//GO:0006333//GO:0006974//GO:0006355
GOAT_ENSBTAP00000006928	111	42	53	561	560	564	6.74683	2.58652	3.66797	31.0416	30.7655	30.8144	68.6667	561.667	4.33377	30.8739	2.83269	8.81e-18	2.88e-16	KLHL2	sp|O95198|KLHL2_HUMAN Kelch-like protein 2 OS=Homo sapiens GN=KLHL2 PE=1 SV=2//0
GOAT_ENSBTAP00000006963	19	20	12	156	191	179	1.92477	2.05279	1.38414	14.3865	17.4887	16.2996	17	175.333	1.78724	16.0583	3.16752	2.37e-13	3.54e-12	SLC35E1	sp|Q96K37|S35E1_HUMAN Solute carrier family 35 member E1 OS=Homo sapiens GN=SLC35E1 PE=1 SV=2//0	GO:0016021//GO:0016020	--	GO:0055085
GOAT_ENSBTAP00000006995	47	10	6	313	352	290	2.78134	0.599578	0.404279	16.8619	18.8277	15.426	21	318.333	1.26173	17.0385	3.75532	1.39e-23	1.15e-21	RNF6	sp|Q9Y252|RNF6_HUMAN E3 ubiquitin-protein ligase RNF6 OS=Homo sapiens GN=RNF6 PE=1 SV=1//0
GOAT_ENSBTAP00000007028	3824	3631	3591	2957	2651	2697	766.115	737.041	819.152	539.302	480.048	485.685	3682	2768.33	774.103	501.678	-0.625762	1.27e-10	1.14e-09	ARPC3	sp|O15145|ARPC3_HUMAN Actin-related protein 2/3 complex subunit 3 OS=Homo sapiens GN=ARPC3 PE=1 SV=3//2.84476e-06	GO:0005737//GO:0005856//GO:0030027//GO:0042995	GO:0003779//GO:0005515	GO:0030833
GOAT_ENSBTAP00000007036	15690	17209	18881	9190	8696	8939	3473.26	3859.75	4758.96	1851.97	1739.93	1778.69	17260	8941.67	4030.66	1790.2	-1.17089	6.03e-09	4.03e-08	RPL27A	sp|Q56K03|RL27A_BOVIN 60S ribosomal protein L27a OS=Bos taurus GN=RPL27A PE=2 SV=3//3.00301e-07	GO:0005840//GO:0030529//GO:0005622	GO:0003735	GO:0006412
GOAT_ENSBTAP00000007132	125	95	58	544	561	607	8.22513	6.33352	4.34544	32.5864	33.3653	35.902	92.6667	570.667	6.30136	33.9512	2.42973	8.27e-13	1.12e-11	Kcnc1	sp|P15388|KCNC1_MOUSE Potassium voltage-gated channel subfamily C member 1 OS=Mus musculus GN=Kcnc1 PE=2 SV=1//6.48449e-74	GO:0016020//GO:0016021//GO:0030673//GO:0008076//GO:0032809//GO:0032590	GO:0005267//GO:0005515//GO:0005249//GO:0005216//GO:0005244	GO:0071805//GO:0006813//GO:0006811//GO:0006810//GO:0051260//GO:0034765//GO:0055085
GOAT_ENSBTAP00000007135	9643	11665	9185	6419	6254	6576	847.581	1038.83	919.224	513.619	496.851	519.551	10164.3	6416.33	935.21	510.007	-0.874774	6.73e-11	6.35e-10	Psmc1	sp|P62193|PRS4_RAT 26S protease regulatory subunit 4 OS=Rattus norvegicus GN=Psmc1 PE=2 SV=1//0	GO:0005737//GO:0022624//GO:0005634//GO:0000502	GO:0009378//GO:0016787//GO:0017111//GO:0000166//GO:0005515//GO:0005524	GO:0006310//GO:0006281//GO:0030163
GOAT_ENSBTAP00000007189	2865	3119	2528	1888	1883	2040	282.262	311.338	283.582	169.33	167.678	180.657	2837.33	1937	292.394	172.555	-0.760854	1.6e-12	2.05e-11	NDUFA9	sp|P34943|NDUA9_BOVIN NADH dehydrogenase [ubiquinone] 1 alpha subcomplex subunit 9, mitochondrial OS=Bos taurus GN=NDUFA9 PE=1 SV=1//6.51427e-14	GO:0005739//GO:0005743//GO:0005759//GO:0070469	GO:0050662//GO:0016616//GO:0003824//GO:0003854//GO:0000166	GO:0022900//GO:0044237//GO:0055114//GO:0006694
GOAT_ENSBTAP00000007204	142	70	65	957	854	866	19.2164	9.59777	10.0154	117.896	104.458	105.341	92.3333	892.333	12.9432	109.232	3.07713	9.06e-24	7.75e-22	LAPTM5	sp|Q2KJA5|LAPM5_BOVIN Lysosomal-associated transmembrane protein 5 OS=Bos taurus GN=LAPTM5 PE=2 SV=1//0	GO:0016021//GO:0016020//GO:0005764//GO:0005765//GO:0005887	--	GO:0006810
GOAT_ENSBTAP00000007289	28	21	23	548	620	622	1.11569	0.847803	1.04349	19.878	22.3294	22.2779	24	596.667	1.00233	21.4951	4.42258	9.06e-41	7.12e-38	EPS15	sp|P42566|EPS15_HUMAN Epidermal growth factor receptor substrate 15 OS=Homo sapiens GN=EPS15 PE=1 SV=2//0
GOAT_ENSBTAP00000007299	32	18	24	236	234	203	0.879364	0.501164	0.750936	5.90385	5.8121	5.01433	24.6667	224.333	0.710488	5.57676	2.97254	1.03e-13	1.66e-12	SOS2	sp|Q07890|SOS2_HUMAN Son of sevenless homolog 2 OS=Homo sapiens GN=SOS2 PE=1 SV=2//6.0678e-11	GO:0005622	GO:0005088//GO:0005543//GO:0005085//GO:0005515//GO:0003677//GO:0005089	GO:0035023//GO:0051056//GO:0007264
GOAT_ENSBTAP00000007327	742	755	638	406	290	298	172.787	178.133	169.162	86.0675	61.0387	62.3767	711.667	331.333	173.361	69.8276	-1.31191	1.12e-19	5e-18	RNASEH2C	sp|Q2M2U4|RNH2C_BOVIN Ribonuclease H2 subunit C OS=Bos taurus GN=RNASEH2C PE=2 SV=1//1.06901e-12	GO:0005634//GO:0032299	--	GO:0006401
GOAT_ENSBTAP00000007391	14	13	15	225	248	262	3.09915	2.91572	3.78076	45.3421	49.6209	52.1331	14	245	3.26521	49.032	3.90848	1.32e-22	9.55e-21	Litaf	sp|P0C0T0|LITAF_RAT Lipopolysaccharide-induced tumor necrosis factor-alpha factor homolog OS=Rattus norvegicus GN=Litaf PE=2 SV=1//2.37679e-16	GO:0005794//GO:0005765//GO:0005886	GO:0005515//GO:0050699//GO:0004871	GO:0071222//GO:0001817//GO:0007165//GO:0042347//GO:0032496//GO:0043123
GOAT_ENSBTAP00000007448	7	5	8	109	109	126	0.643669	0.465826	0.837583	9.12422	9.0592	10.4144	6.66667	114.667	0.649026	9.5326	3.87652	4.38e-14	7.51e-13	Slc39a8	sp|Q91W10|S39A8_MOUSE Zinc transporter ZIP8 OS=Mus musculus GN=Slc39a8 PE=2 SV=1//0	GO:0031090//GO:0016020	GO:0046873	GO:0030001//GO:0006829//GO:0055085
GOAT_ENSBTAP00000007466	65	47	34	254	316	287	6.95821	5.09766	4.14416	24.7527	30.5753	27.6162	48.6667	285.667	5.40001	27.6481	2.35614	1.35e-09	1.01e-08	UBAC2	sp|Q4R910|UBAC2_MACFA Ubiquitin-associated domain-containing protein 2 OS=Macaca fascicularis GN=UBAC2 PE=2 SV=1//0	GO:0016021//GO:0016020//GO:0005886	GO:0004930//GO:0004871//GO:0008142//GO:0005515//GO:0045028//GO:0004872	GO:0006959//GO:0030890//GO:0002313//GO:0007165//GO:0070374//GO:0007186//GO:0035589
GOAT_ENSBTAP00000007481	172	91	109	602	692	676	27.7846	14.8938	20.0482	88.5273	101.037	98.1569	124	656.667	20.9089	95.9071	2.19752	1e-10	9.18e-10	TMED10	sp|Q5E971|TMEDA_BOVIN Transmembrane emp24 domain-containing protein 10 OS=Bos taurus GN=TMED10 PE=2 SV=1//2.27631e-26	GO:0005794//GO:0016020//GO:0005783//GO:0005793//GO:0070765//GO:0030667//GO:0016021	GO:0019905//GO:0005515	GO:0007030//GO:0006886//GO:0006810//GO:0048199//GO:0034205//GO:0045055//GO:0035964
GOAT_ENSBTAP00000007563	16	14	8	193	188	170	1.5383	1.36376	0.875757	16.892	16.3372	14.6915	12.6667	183.667	1.25927	15.9736	3.66503	3.17e-17	9.42e-16	PPM1K	sp|Q2PC20|PPM1K_BOVIN Protein phosphatase 1K, mitochondrial OS=Bos taurus GN=PPM1K PE=2 SV=1//0	GO:0008287//GO:0005739//GO:0005759	GO:0016787//GO:0004722//GO:0003824//GO:0004721//GO:0046872	GO:0006470
GOAT_ENSBTAP00000007628	143	173	116	1272	1184	1426	6.14892	7.537	5.67929	49.7915	46.0165	55.1163	144	1294	6.45507	50.3081	2.96229	6.81e-24	6.04e-22	GRIA1	sp|Q38PU8|GRIA1_MACFA Glutamate receptor 1 OS=Macaca fascicularis GN=GRIA1 PE=2 SV=1//0	GO:0008021//GO:0032281//GO:0030425//GO:0045202//GO:0030288//GO:0032590//GO:0030054//GO:0016021//GO:0016020//GO:0044309//GO:0043005//GO:0043025//GO:0009986//GO:0008328//GO:0045211//GO:0014069//GO:0005886//GO:0043197//GO:0005624	GO:0004971//GO:0004970//GO:0005215//GO:0005216//GO:0005234//GO:0005515//GO:0004872	GO:0007616//GO:0007268//GO:0035235//GO:0006811//GO:0006810//GO:0031623
GOAT_ENSBTAP00000007636	200	120	85	723	785	694	14.9735	9.10257	7.24579	49.2761	53.1205	46.7037	135	734	10.4406	49.7001	2.25104	2.16e-11	2.26e-10	MICU1	sp|Q9BPX6|MICU1_HUMAN Calcium uptake protein 1, mitochondrial OS=Homo sapiens GN=MICU1 PE=1 SV=1//2.81482e-08	GO:0016020//GO:0005739//GO:0005743//GO:0032592//GO:0016021	GO:0005509//GO:0005515	GO:0006851//GO:0006811//GO:0006810//GO:0006816//GO:0070509//GO:0051561//GO:0051560
GOAT_ENSBTAP00000007678	81	53	46	285	289	263	6.24685	4.14134	4.03931	20.009	20.1453	18.2318	60	279	4.80917	19.462	2.0168	7.98e-07	3.66e-06	ULK3	sp|Q6PHR2|ULK3_HUMAN Serine/threonine-protein kinase ULK3 OS=Homo sapiens GN=ULK3 PE=1 SV=2//0	GO:0005737//GO:0016020	GO:0004713//GO:0016772//GO:0000166//GO:0004674//GO:0005515//GO:0004672//GO:0016773//GO:0005524	GO:0006468//GO:0045879//GO:0045880//GO:0046777//GO:0009103
GOAT_ENSBTAP00000007681	24	13	20	165	169	160	2.76745	1.5188	2.62586	17.3204	17.6139	16.5839	19	164.667	2.30404	17.1727	2.89788	3.36e-11	3.38e-10	SCAMP2	sp|O15127|SCAM2_HUMAN Secretory carrier-associated membrane protein 2 OS=Homo sapiens GN=SCAMP2 PE=1 SV=2//2.11381e-154	GO:0005794//GO:0055038//GO:0005634//GO:0032588//GO:0016021//GO:0043231	GO:0005515	GO:0015031
GOAT_ENSBTAP00000007691	14	20	16	171	191	160	0.371073	0.537094	0.482864	4.12603	4.57576	3.81197	16.6667	174	0.463677	4.17125	3.16929	1.9e-13	2.9e-12	ROCK2	sp|Q28021|ROCK2_BOVIN Rho-associated protein kinase 2 OS=Bos taurus GN=ROCK2 PE=1 SV=1//0	GO:0031616//GO:0005813//GO:0005622	GO:0005543//GO:0000166//GO:0004674//GO:0016740//GO:0004713//GO:0004672//GO:0046872//GO:0005524//GO:0016301//GO:0016772//GO:0005515	GO:0016310//GO:0030036//GO:0010825//GO:0007165//GO:0035556//GO:0001843//GO:0006468//GO:0051298//GO:0000910//GO:0045616//GO:0016525
GOAT_ENSBTAP00000007693	116	43	36	435	502	486	13.5063	5.07266	4.77259	46.1076	52.8301	50.8642	65	474.333	7.78385	49.934	2.68147	7.29e-15	1.42e-13	VTA1	sp|Q32L63|VTA1_BOVIN Vacuolar protein sorting-associated protein VTA1 homolog OS=Bos taurus GN=VTA1 PE=2 SV=1//0	GO:0005737	GO:0005515	--
GOAT_ENSBTAP00000007762	9	2	5	156	144	144	2.54137	0.572196	1.60757	40.101	36.7525	36.5499	5.33333	148	1.57371	37.8011	4.58619	2.08e-20	1.03e-18	LEPROT	sp|Q3SYT0|OBRG_BOVIN Leptin receptor gene-related protein OS=Bos taurus GN=LEPROT PE=2 SV=1//3.08985e-08	GO:0005794//GO:0016021//GO:0016020//GO:0000139//GO:0005768//GO:0010008	GO:0005515//GO:0005102	GO:0060400//GO:0046426//GO:2000009
GOAT_ENSBTAP00000007781	44	27	26	221	298	214	2.17343	1.35128	1.46231	9.93778	13.3048	9.50176	32.3333	244.333	1.66234	10.9148	2.715	1.96e-11	2.06e-10	ABTB2	sp|Q8N961|ABTB2_HUMAN Ankyrin repeat and BTB/POZ domain-containing protein 2 OS=Homo sapiens GN=ABTB2 PE=2 SV=1//7.5677e-22	--	GO:0005515//GO:0003677	--
GOAT_ENSBTAP00000007833	18	15	15	222	238	248	0.372265	0.314312	0.353219	4.17963	4.44893	4.6103	16	236	0.346599	4.41296	3.67041	4.62e-20	2.19e-18	UBR2	sp|Q8IWV8|UBR2_HUMAN E3 ubiquitin-protein ligase UBR2 OS=Homo sapiens GN=UBR2 PE=1 SV=1//0	GO:0005634//GO:0000151//GO:0000785//GO:0005886	GO:0070728//GO:0008270//GO:0005515//GO:0004842	GO:0033522//GO:0071233//GO:0006342//GO:0016567//GO:0007283//GO:0006511//GO:0030163//GO:0032007//GO:0007141
GOAT_ENSBTAP00000007861	91	45	41	954	922	846	8.52063	4.26906	4.37107	81.3174	78.0298	71.203	59	907.333	5.72025	76.8501	3.7479	5.01e-35	1.86e-32	S1PR1	sp|Q5E9P3|S1PR1_BOVIN Sphingosine 1-phosphate receptor 1 OS=Bos taurus GN=S1PR1 PE=2 SV=1//0	GO:0009897//GO:0016020//GO:0005886//GO:0016021	GO:0004930//GO:0038036//GO:0004871//GO:0004872	GO:0008284//GO:0003376//GO:0007420//GO:0030155//GO:0007165//GO:0007193//GO:0001525//GO:0007186
GOAT_ENSBTAP00000007900	40	25	26	200	194	197	2.02322	1.28119	1.49737	9.20911	8.86918	8.95668	30.3333	197	1.60059	9.01166	2.49319	3.15e-09	2.21e-08	POLH	sp|Q9Y253|POLH_HUMAN DNA polymerase eta OS=Homo sapiens GN=POLH PE=1 SV=1//0	GO:0005737//GO:0005634	GO:0003887//GO:0003684	GO:0006290//GO:0006301//GO:0006281//GO:0000731//GO:0010225
GOAT_ENSBTAP00000007937	92	63	70	655	615	584	4.47055	3.10172	3.87297	28.9747	27.0114	25.5084	75	618	3.81508	27.1648	2.83196	1.73e-18	6.28e-17	KLHL5	sp|Q96PQ7|KLHL5_HUMAN Kelch-like protein 5 OS=Homo sapiens GN=KLHL5 PE=2 SV=3//2.07618e-15	--	GO:0005515	--
GOAT_ENSBTAP00000007976	447	313	219	1584	1821	1743	29.7957	21.1388	16.6213	96.1184	109.712	104.434	326.333	1716	22.5186	103.422	2.19935	2.35e-12	2.91e-11	Cttn	sp|Q60598|SRC8_MOUSE Src substrate cortactin OS=Mus musculus GN=Cttn PE=1 SV=2//0	GO:0005737//GO:0030027//GO:0001726//GO:0005938	GO:0005515	--
GOAT_ENSBTAP00000007991	196	225	127	809	963	1021	6.60607	7.6835	4.87376	24.8222	29.3368	30.9322	182.667	931	6.38778	28.3637	2.15066	7.34e-11	6.88e-10	MAST1	sp|Q9Y2H9|MAST1_HUMAN Microtubule-associated serine/threonine-protein kinase 1 OS=Homo sapiens GN=MAST1 PE=1 SV=2//3.40768e-10	GO:0005737//GO:0016020//GO:0005886	GO:0000287//GO:0000166//GO:0004674//GO:0016740//GO:0004713//GO:0004672//GO:0005524//GO:0016301//GO:0016773//GO:0016772//GO:0005515	GO:0006927//GO:0016310//GO:0071243//GO:0007165//GO:0009103//GO:0031572//GO:0006468//GO:0006915//GO:0010976//GO:0071363//GO:0007010//GO:2000045//GO:0007243//GO:0002357//GO:0030097
GOAT_ENSBTAP00000008015	13	14	9	213	181	183	0.849181	0.926561	0.66938	12.666	10.6865	10.745	12	192.333	0.81504	11.3658	3.80169	9.18e-19	3.5e-17	PIP5K1A	sp|Q99755|PI51A_HUMAN Phosphatidylinositol 4-phosphate 5-kinase type-1 alpha OS=Homo sapiens GN=PIP5K1A PE=1 SV=1//1.54764e-18	GO:0005737//GO:0016607//GO:0005847//GO:0032587//GO:0030027//GO:0005886//GO:0005634	GO:0005515//GO:0016307//GO:0016308//GO:0019900	GO:0097178//GO:0008654//GO:0031532//GO:0072661//GO:0046854//GO:0032863//GO:0046488//GO:0048041//GO:0060326//GO:0010761
GOAT_ENSBTAP00000008039	96	97	38	338	384	386	12.3838	12.6778	5.58137	39.6923	44.7728	44.7579	77	369.333	10.2144	43.0743	2.07623	7.24e-08	3.97e-07	FLYWCH1	sp|Q4VC44|FWCH1_HUMAN FLYWCH-type zinc finger-containing protein 1 OS=Homo sapiens GN=FLYWCH1 PE=1 SV=2//1.58997e-15
GOAT_ENSBTAP00000008068	4817	4965	3915	3551	3517	3665	1780.88	1859.8	1648.02	1195.12	1175.25	1217.95	4565.67	3577.67	1762.9	1196.11	-0.559604	6.6e-10	5.25e-09	Dynlrb1	sp|P62628|DLRB1_RAT Dynein light chain roadblock-type 1 OS=Rattus norvegicus GN=Dynlrb1 PE=1 SV=3//3.90624e-64	GO:0005737//GO:0005856//GO:0005813//GO:0005868//GO:0030286//GO:0005874	GO:0005515//GO:0003774//GO:0042802	GO:0006810
GOAT_ENSBTAP00000008106	57	64	51	282	293	310	4.12951	4.69778	4.20695	18.5985	19.1863	20.1875	57.3333	295	4.34475	19.3241	2.15306	3.6e-08	2.09e-07	RAB11FIP5	sp|Q9BXF6|RFIP5_HUMAN Rab11 family-interacting protein 5 OS=Homo sapiens GN=RAB11FIP5 PE=1 SV=1//0	GO:0043231//GO:0005813//GO:0005739//GO:0005741	GO:0005515//GO:0043015	--
GOAT_ENSBTAP00000008142	4036	4635	4016	2297	2279	2485	720.086	837.861	815.831	373.077	367.516	398.527	4229	2353.67	791.259	379.707	-1.05926	4.77e-15	9.6e-14	DRAP1	sp|Q2YDP3|NC2A_BOVIN Dr1-associated corepressor OS=Bos taurus GN=DRAP1 PE=2 SV=1//5.44974e-89	GO:0005634//GO:0005622	GO:0043565//GO:0003714//GO:0005515//GO:0003677//GO:0008134	GO:0000122//GO:0006355//GO:0006351
GOAT_ENSBTAP00000008153	42	46	39	416	388	467	1.36306	1.51256	1.44113	12.2904	11.3814	13.6233	42.3333	423.667	1.43892	12.4317	3.11096	1.02e-19	4.6e-18	ADCY7	sp|Q29450|ADCY7_BOVIN Adenylate cyclase type 7 OS=Bos taurus GN=ADCY7 PE=2 SV=1//0	GO:0016021//GO:0016020//GO:0005622//GO:0005886	GO:0046872//GO:0000166//GO:0016849//GO:0016829//GO:0004016//GO:0005524	GO:0071361//GO:0030819//GO:0035556//GO:0009190//GO:0006171
GOAT_ENSBTAP00000008196	2116	2758	2207	1081	1275	1337	269.089	355.356	319.562	125.144	146.551	152.83	2360.33	1231	314.669	141.508	-1.15295	2.01e-09	1.46e-08	Wdr83	sp|Q9DAJ4|WDR83_MOUSE WD repeat domain-containing protein 83 OS=Mus musculus GN=Wdr83 PE=1 SV=1//1.83025e-13	GO:0071013//GO:0005622//GO:0005681	GO:0016301//GO:0008270//GO:0005515	GO:0016310//GO:0000398//GO:0000375
GOAT_ENSBTAP00000008200	2081	2597	1930	1285	1417	1479	209.629	265.058	221.365	117.838	129.017	133.92	2202.67	1393.67	232.017	126.925	-0.870253	4.12e-09	2.85e-08	DHPS	sp|Q6EWQ6|DHYS_BOVIN Deoxyhypusine synthase OS=Bos taurus GN=DHPS PE=2 SV=2//0	--	GO:0016740//GO:0034038//GO:0005515	GO:0050983//GO:0008612
GOAT_ENSBTAP00000008272	23	5	14	167	185	156	2.60194	0.573098	1.80331	17.1985	18.9165	15.8633	14	169.333	1.65945	17.3261	3.38417	1.22e-14	2.29e-13	HSD17B11	sp|Q5NVG2|DHB11_PONAB Estradiol 17-beta-dehydrogenase 11 OS=Pongo abelii GN=HSD17B11 PE=2 SV=1//6.84358e-46	GO:0005737//GO:0005811	GO:0016229//GO:0000166//GO:0016491	GO:0006710//GO:0008152//GO:0055114
GOAT_ENSBTAP00000008279	14	8	5	164	179	127	1.93846	1.26122	0.701437	20.6714	22.2783	15.894	9	156.333	1.30037	19.6145	3.91492	2.82e-07	2.11e-06	PDYN	sp|Q95104|PDYN_BOVIN Preprodynorphin OS=Bos taurus GN=PDYN PE=2 SV=1//6.45179e-159
GOAT_ENSBTAP00000008292	18	13	9	238	216	225	1.33646	0.977945	0.760848	16.0866	14.4956	15.0163	13.3333	226.333	1.02508	15.1995	3.89021	3.13e-21	1.75e-19	DBT	sp|P11181|ODB2_BOVIN Lipoamide acyltransferase component of branched-chain alpha-keto acid dehydrogenase complex, mitochondrial OS=Bos taurus GN=DBT PE=1 SV=2//0	GO:0005737//GO:0045254//GO:0015630//GO:0005739//GO:0005759//GO:0042645	GO:0048037//GO:0004742//GO:0016740//GO:0016746//GO:0043754	GO:0006090//GO:0046949//GO:0008152
GOAT_ENSBTAP00000008319	5323	6187	5290	2355	2220	2504	3742.96	4407.86	4235.34	1507.49	1410.95	1582.67	5600	2359.67	4128.72	1500.37	-1.46038	1.41e-18	5.2e-17	ATPIF1	sp|P01096|ATIF1_BOVIN ATPase inhibitor, mitochondrial OS=Bos taurus GN=ATPIF1 PE=1 SV=2//5.50707e-26	GO:0009986//GO:0005739	GO:0051117//GO:0042030//GO:0043532//GO:0005516//GO:0005515//GO:0004857//GO:0042803	GO:0051346//GO:0051289//GO:0051260//GO:0045980//GO:0043086//GO:0001937
GOAT_ENSBTAP00000008352	3247	3508	3147	1924	1806	1837	546.678	598.409	603.281	294.889	274.831	278.007	3300.67	1855.67	582.789	282.576	-1.04433	5.13e-17	1.45e-15	CHMP4A	sp|A2VDY3|CHM4A_BOVIN Charged multivesicular body protein 4a OS=Bos taurus GN=CHMP4A PE=2 SV=1//5.44166e-81	GO:0031410//GO:0016020//GO:0030496//GO:0030659//GO:0005768//GO:0031902	GO:0008289	GO:0006810//GO:0015031
GOAT_ENSBTAP00000008363	1585	1654	1249	942	838	883	355.253	375.607	318.746	192.205	169.767	177.897	1496	887.667	349.869	179.956	-0.959169	3.01e-15	6.29e-14	NHP2	sp|Q5E950|NHP2_BOVIN H/ACA ribonucleoprotein complex subunit 2 OS=Bos taurus GN=NHP2 PE=2 SV=1//4.84795e-26	GO:0005730//GO:0005634//GO:0030529//GO:0015030	GO:0003723	GO:0042254//GO:0006364
GOAT_ENSBTAP00000008385	64	34	26	322	324	344	3.2055	1.72538	1.48273	14.6817	14.6676	15.4872	41.3333	330	2.13787	14.9455	2.80547	2.17e-14	3.91e-13	TTC7B	sp|Q86TV6|TTC7B_HUMAN Tetratricopeptide repeat protein 7B OS=Homo sapiens GN=TTC7B PE=1 SV=3//5.84634e-07	--	GO:0005515	--
GOAT_ENSBTAP00000008479	90	35	54	344	249	233	14.6706	5.78048	10.0224	51.0469	36.6864	34.1397	59.6667	275.333	10.1578	40.6243	1.99975	4.98e-05	0.00016581	CD53	sp|Q58DM3|CD53_BOVIN Leukocyte surface antigen CD53 OS=Bos taurus GN=CD53 PE=2 SV=1//1.80531e-18	GO:0016021//GO:0016020//GO:0001772	GO:0005515	--
GOAT_ENSBTAP00000008517	7	33	10	195	200	216	0.689645	3.29405	1.12176	17.4891	17.8097	19.1284	16.6667	203.667	1.70182	18.1424	3.41421	1.92e-16	4.89e-15	Pip4k2b	sp|Q80XI4|PI42B_MOUSE Phosphatidylinositol 5-phosphate 4-kinase type-2 beta OS=Mus musculus GN=Pip4k2b PE=1 SV=1//2.17676e-64	--	GO:0016308//GO:0016307//GO:0005515	GO:0046488//GO:0046854
GOAT_ENSBTAP00000008609	212	170	141	733	719	707	36.2031	29.4136	27.4159	113.951	110.978	108.524	174.333	719.667	31.0108	111.151	1.84168	3.83e-07	1.86e-06	HDGF	sp|Q9XSK7|HDGF_BOVIN Hepatoma-derived growth factor OS=Bos taurus GN=HDGF PE=2 SV=1//6.34601e-107	GO:0005737//GO:0005634	--	--
GOAT_ENSBTAP00000008669	51	20	14	442	332	349	6.19979	2.46335	1.9378	48.9141	36.4791	38.1356	28.3333	374.333	3.53365	41.1763	3.54258	3.47e-23	2.72e-21	CCNG1	sp|Q5E9I1|CCNG1_BOVIN Cyclin-G1 OS=Bos taurus GN=CCNG1 PE=2 SV=1//0	GO:0005634	GO:0005515	GO:0051726//GO:0007049//GO:0007067//GO:0051301
GOAT_ENSBTAP00000008733	59	19	32	453	412	412	3.89656	1.27137	2.40631	27.2353	24.5938	24.4582	36.6667	425.667	2.52475	25.4291	3.33227	3.03e-22	2.1e-20	Rcbtb2	sp|Q99LJ7|RCBT2_MOUSE RCC1 and BTB domain-containing protein 2 OS=Mus musculus GN=Rcbtb2 PE=2 SV=1//2.15179e-16	--	GO:0005515	--
GOAT_ENSBTAP00000008751	84	58	44	400	401	460	7.53092	5.26849	4.49154	32.6463	32.4947	37.0702	62	420.333	5.76365	34.0704	2.56346	3.48e-13	5.05e-12	CYTH1	sp|Q15438|CYH1_HUMAN Cytohesin-1 OS=Homo sapiens GN=CYTH1 PE=1 SV=1//0	GO:0005737//GO:0005622//GO:0005886//GO:0005923	GO:0005543//GO:0005515//GO:0005086	GO:0030155//GO:0090162//GO:0032012
GOAT_ENSBTAP00000008785	138	49	82	561	1007	689	5.67534	2.04173	3.83972	21.0029	37.4318	25.47	89.6667	752.333	3.85226	27.9683	2.86001	7.97e-06	3.04e-05	PCSK6	sp|P29122|PCSK6_HUMAN Proprotein convertase subtilisin/kexin type 6 OS=Homo sapiens GN=PCSK6 PE=1 SV=1//0	GO:0005615//GO:0005625//GO:0031012//GO:0009986	GO:0016787//GO:0004175//GO:0043499//GO:0008201//GO:0004252//GO:0008236//GO:0048406//GO:0005515//GO:0008233	GO:0007368//GO:0032902//GO:0032940//GO:0016485//GO:0006508//GO:0016486//GO:0009100//GO:0007354
GOAT_ENSBTAP00000008883	1792	1777	1572	1240	985	1102	203.367	204.324	203.127	128.106	101.036	112.414	1713.67	1109	203.606	113.852	-0.838618	2.1e-13	3.17e-12	DBP	sp|Q10586|DBP_HUMAN D site-binding protein OS=Homo sapiens GN=DBP PE=2 SV=1//4.67592e-39	GO:0005634	GO:0043565//GO:0003700//GO:0001077//GO:0003677//GO:0046983//GO:0000977	GO:0048511//GO:0006355//GO:0045944//GO:0006351
GOAT_ENSBTAP00000008919	749	931	798	388	388	425	235.617	296.731	285.825	111.112	110.32	120.174	826	400.333	272.724	113.869	-1.26007	1.04e-11	1.15e-10		sp|Q3SZA2|CG055_BOVIN UPF0562 protein C7orf55 homolog OS=Bos taurus PE=3 SV=1//2.29327e-77
GOAT_ENSBTAP00000008936	1508	1572	1604	1048	954	1065	432.634	456.942	523.958	273.706	247.381	274.642	1561.33	1022.33	471.178	265.243	-0.828957	6.16e-12	7.08e-11	GCSH	sp|P20821|GCSH_BOVIN Glycine cleavage system H protein, mitochondrial OS=Bos taurus GN=GCSH PE=1 SV=1//1.56327e-21	GO:0005960//GO:0005739	--	GO:0019464//GO:0006546
GOAT_ENSBTAP00000008985	83	34	45	365	352	430	2.93541	1.21831	1.81208	11.7514	11.2521	13.6697	54	382.333	1.9886	12.2244	2.61993	2.11e-13	3.17e-12	UBA6	sp|A0AVT1|UBA6_HUMAN Ubiquitin-like modifier-activating enzyme 6 OS=Homo sapiens GN=UBA6 PE=1 SV=1//3.09343e-18	GO:0005737	GO:0003824//GO:0019780//GO:0008641//GO:0000166//GO:0005515//GO:0005524	GO:0006464//GO:0016567//GO:0006511
GOAT_ENSBTAP00000008991	75	44	38	374	195	251	6.72404	3.99679	3.87905	30.5243	15.8017	20.2274	52.3333	273.333	4.86663	22.1845	2.18856	0.000859827	0.00226981	LEF1	sp|Q9UJU2|LEF1_HUMAN Lymphoid enhancer-binding factor 1 OS=Homo sapiens GN=LEF1 PE=1 SV=1//0	GO:0005667//GO:0005737//GO:0005634//GO:0032993	GO:0044212//GO:0042393//GO:0003677//GO:0030284//GO:0070742//GO:0043027//GO:0008013//GO:0008301//GO:0000977//GO:0043565//GO:0008134//GO:0035326//GO:0045295//GO:0005515//GO:0003682//GO:0030331//GO:0003700//GO:0003705//GO:0070016	GO:0033153//GO:0060710//GO:0048468//GO:0046632//GO:0030223//GO:0030509//GO:0030111//GO:0060325//GO:0060326//GO:0030854//GO:0043966//GO:0043967//GO:0061153//GO:0001756//GO:0016055//GO:0048341//GO:0045843//GO:0010628//GO:0071864//GO:0071866//GO:0090068//GO:0006357//GO:0001569//GO:0071353//GO:0006366//GO:0002040//GO:0030879//GO:0021542//GO:0060070//GO:0043392//GO:0010718//GO:0071345//GO:0043154//GO:…
GOAT_ENSBTAP00000009081	42	19	29	221	205	213	2.71875	1.24613	2.13742	13.0232	11.9942	12.3936	30	213	2.0341	12.4703	2.61604	1.51e-10	1.34e-09	SMAD4	sp|Q1HE26|SMAD4_BOVIN Mothers against decapentaplegic homolog 4 OS=Bos taurus GN=SMAD4 PE=2 SV=1//0	GO:0005813//GO:0005634//GO:0032444//GO:0005622//GO:0071141//GO:0005667//GO:0005737	GO:0070411//GO:0005518//GO:0001076//GO:0003677//GO:0044212//GO:0000987//GO:0042802//GO:0000988//GO:0042803//GO:0001085//GO:0003682//GO:0005515//GO:0003700//GO:0030616//GO:0043565//GO:0070412	GO:0007492//GO:0003251//GO:0030308//GO:0032909//GO:0007498//GO:0060021//GO:0030509//GO:0042177//GO:0072133//GO:0007411//GO:0001666//GO:0072134//GO:0001702//GO:0014033//GO:0001701//GO:0048589//GO:0042118//GO:0007369//GO:0001822//GO:0032525//GO:0010862//GO:0030511//GO:0048729//GO:0006366//GO:0007183//GO:0051797//GO:0071559//GO:0060956//GO:0003190//GO:0042127//GO:0008285//GO:0048663//GO:0008283//GO:…
GOAT_ENSBTAP00000009083	29	14	17	291	310	268	0.971041	0.47496	0.648129	8.87028	9.38211	8.06626	20	289.667	0.698043	8.77288	3.65166	5.44e-22	3.57e-20	PIK3CB	sp|P42338|PK3CB_HUMAN Phosphatidylinositol 4,5-bisphosphate 3-kinase catalytic subunit beta isoform OS=Homo sapiens GN=PIK3CB PE=1 SV=1//0	--	GO:0043560//GO:0005515//GO:0016773//GO:0016301//GO:0016772//GO:0016740//GO:0016303//GO:0005488	GO:0040016//GO:0016310//GO:0001952//GO:0030168//GO:0046854//GO:0007156//GO:0048015//GO:0006874
GOAT_ENSBTAP00000009152	9404	11106	10535	6401	4930	4661	2056.35	2460.55	2622.97	1274.2	974.386	916.141	10348.3	5330.67	2379.96	1054.91	-1.17382	8.88e-11	8.24e-10	Rpl12	sp|P35979|RL12_MOUSE 60S ribosomal protein L12 OS=Mus musculus GN=Rpl12 PE=1 SV=2//4.76763e-11	GO:0005840//GO:0022625//GO:0030529	GO:0003735//GO:0003723	GO:0006412
GOAT_ENSBTAP00000009208	919	831	530	5520	6353	6961	13.7492	12.5965	9.02839	75.1804	85.909	93.6118	760	6278	11.7914	84.9004	2.84804	4.1e-25	4.37e-23	SPTBN1	sp|Q01082|SPTB2_HUMAN Spectrin beta chain, non-erythrocytic 1 OS=Homo sapiens GN=SPTBN1 PE=1 SV=2//0	GO:0005737//GO:0031430//GO:0008091//GO:0032437//GO:0005730//GO:0030863//GO:0016020//GO:0005886//GO:0005634//GO:0030673	GO:0005543//GO:0003779//GO:0005200//GO:0005515	GO:0072661//GO:0007009//GO:0000281//GO:0043001//GO:0007182//GO:0071709//GO:0007184
GOAT_ENSBTAP00000009325	945	1221	1173	550	517	471	141.796	185.625	200.402	75.1274	70.1166	63.5258	1113	512.667	175.941	69.5899	-1.33814	1.83e-08	1.12e-07	FRG1	sp|Q14331|FRG1_HUMAN Protein FRG1 OS=Homo sapiens GN=FRG1 PE=1 SV=1//2.34793e-161	GO:0071013	GO:0030674//GO:0051015	--
GOAT_ENSBTAP00000009395	526	324	276	1822	1760	1931	46.3469	28.9247	27.6896	146.146	140.167	152.938	375.333	1837.67	34.3204	146.417	2.09295	4.82e-11	4.71e-10	WSB2	sp|Q0V8J1|WSB2_BOVIN WD repeat and SOCS box-containing protein 2 OS=Bos taurus GN=WSB2 PE=2 SV=1//0	GO:0005622	GO:0005515	GO:0016567//GO:0035556
GOAT_ENSBTAP00000009418	69	77	57	505	421	455	2.88061	3.25699	2.70947	19.1925	15.8861	17.0744	67.6667	460.333	2.94902	17.3843	2.55948	1.1e-13	1.77e-12	AGAP2	sp|Q99490|AGAP2_HUMAN Arf-GAP with GTPase, ANK repeat and PH domain-containing protein 2 OS=Homo sapiens GN=AGAP2 PE=1 SV=2//0	GO:0005925//GO:0005737//GO:0005730//GO:0005634//GO:0016020//GO:0005739//GO:0005622	GO:0005543//GO:0008060//GO:0008270//GO:0005525//GO:0003924//GO:0005515	GO:0032312//GO:0043066//GO:0046427//GO:0033601//GO:0006184//GO:0060749//GO:0007264//GO:0045944//GO:0015031//GO:0007165
GOAT_ENSBTAP00000009440	153	63	59	944	1085	1266	13.6488	5.6942	5.99278	76.6619	87.4846	101.516	91.6667	1098.33	8.44526	88.5542	3.39035	7.88e-22	5.03e-20	GOT2	sp|P12344|AATM_BOVIN Aspartate aminotransferase, mitochondrial OS=Bos taurus GN=GOT2 PE=1 SV=2//5.0049e-16	GO:0016020//GO:0005739//GO:0005759//GO:0009986//GO:0005886//GO:0005743	GO:0008483//GO:0030170//GO:0004069//GO:0016740//GO:0003824//GO:0080130	GO:0006520//GO:0006869//GO:0006103//GO:0019550//GO:0015908//GO:0006810//GO:0045471//GO:0009058//GO:0006536//GO:0019551//GO:0006531//GO:0006532//GO:0006533//GO:0006107
GOAT_ENSBTAP00000009441	7	10	7	244	284	207	0.230304	0.333343	0.262225	7.30798	8.44539	6.12168	8	245	0.275291	7.29168	4.72723	4.81e-29	8.16e-27	PDGFRA	sp|P16234|PGFRA_HUMAN Platelet-derived growth factor receptor alpha OS=Homo sapiens GN=PDGFRA PE=1 SV=1//0	GO:0009897//GO:0031226//GO:0016021//GO:0016020//GO:0009986//GO:0005634//GO:0005887	GO:0005021//GO:0004872//GO:0004714//GO:0000166//GO:0016740//GO:0004713//GO:0004672//GO:0005018//GO:0005524//GO:0042803//GO:0005515//GO:0016301//GO:0048407//GO:0016772//GO:0005161//GO:0043548	GO:0048705//GO:0030324//GO:0030325//GO:0033327//GO:0016310//GO:2000739//GO:0030335//GO:0018108//GO:0060021//GO:0001553//GO:0048008//GO:0023019//GO:0060325//GO:0035790//GO:0060326//GO:0007169//GO:0010863//GO:0009653//GO:0048146//GO:0046777//GO:0071230//GO:0001701//GO:0002572//GO:0002328//GO:0045740//GO:0002320//GO:0016477//GO:0008284//GO:0008285//GO:0006468//GO:0048557//GO:0048701//GO:0008210//GO:…
GOAT_ENSBTAP00000009476	96	42	46	430	411	452	9.56308	4.23902	5.21744	38.9942	37.0056	40.4728	61.3333	431	6.33985	38.8242	2.61444	7.77e-14	1.28e-12	EI24	sp|Q08DE5|EI24_BOVIN Etoposide-induced protein 2.4 homolog OS=Bos taurus GN=EI24 PE=2 SV=1//0	--	--	GO:0006917//GO:0042493//GO:0030308
GOAT_ENSBTAP00000009497	59	67	59	317	396	417	3.30083	3.79783	3.75834	16.1449	20.0247	20.9703	61.6667	376.667	3.619	19.0466	2.39587	2.98e-11	3.03e-10	CASKIN2	sp|Q8WXE0|CSKI2_HUMAN Caskin-2 OS=Homo sapiens GN=CASKIN2 PE=1 SV=2//0	--	GO:0005515	--
GOAT_ENSBTAP00000009542	178	91	85	601	742	754	22.7977	11.8087	12.3955	70.0729	85.8962	86.8041	118	699	15.6673	80.9244	2.36882	9.05e-13	1.22e-11	TSPAN33	sp|Q3SYV5|TSN33_BOVIN Tetraspanin-33 OS=Bos taurus GN=TSPAN33 PE=2 SV=1//0	GO:0016021//GO:0016020	--	--
GOAT_ENSBTAP00000009547	148	65	52	956	1144	935	8.92018	3.96931	3.56852	52.4535	62.3214	50.6549	88.3333	1011.67	5.486	55.1433	3.32936	1.53e-28	2.43e-26	GAD1	sp|Q0VCA1|DCE1_BOVIN Glutamate decarboxylase 1 OS=Bos taurus GN=GAD1 PE=2 SV=1//4.81819e-17	GO:0005622	GO:0005515//GO:0016829//GO:0016831//GO:0003824//GO:0030170//GO:0004351	GO:0042136//GO:0006520//GO:0019752//GO:0008152
GOAT_ENSBTAP00000009607	87	73	52	1457	1465	1375	4.91331	4.17703	3.34374	74.9065	74.7811	69.8001	70.6667	1432.33	4.14469	73.1626	4.14177	9.44e-47	1.67e-43	RAD21	sp|Q3SWX9|RAD21_BOVIN Double-strand-break repair protein rad21 homolog OS=Bos taurus GN=RAD21 PE=2 SV=1//0	GO:0000228//GO:0005634//GO:0008278//GO:0034991//GO:0005694//GO:0000775	GO:0005515	GO:0006281//GO:0006915//GO:0071168//GO:0006974//GO:0006357//GO:0051301//GO:0007059//GO:0007067//GO:0007049
GOAT_ENSBTAP00000009615	534	296	201	1960	2047	2048	22.5826	12.6828	9.67838	75.456	78.2438	77.8504	343.667	2018.33	14.9813	77.1834	2.36513	7.58e-15	1.47e-13	VPS41	sp|P49754|VPS41_HUMAN Vacuolar protein sorting-associated protein 41 homolog OS=Homo sapiens GN=VPS41 PE=1 SV=3//0	GO:0030897//GO:0016020//GO:0005624//GO:0005770//GO:0005798//GO:0005769//GO:0005874//GO:0005829	GO:0008017//GO:0008270//GO:0005515//GO:0046872//GO:0005488	GO:0016192//GO:0048193//GO:0006886
GOAT_ENSBTAP00000009665	1386	1744	1577	805	777	736	242.459	309.108	314.109	128.196	122.856	115.731	1569	772.667	288.559	122.261	-1.2389	4.7e-10	3.83e-09	COMMD4	sp|Q5E9V6|COMD4_BOVIN COMM domain-containing protein 4 OS=Bos taurus GN=COMMD4 PE=2 SV=2//2.12931e-27	GO:0005737	GO:0005515	--
GOAT_ENSBTAP00000009684	1361	1550	1399	705	712	727	503.171	580.602	588.909	237.275	237.923	241.596	1436.67	714.667	557.56	238.931	-1.22253	4.17e-16	1e-14	Lsm3	sp|P62311|LSM3_MOUSE U6 snRNA-associated Sm-like protein LSm3 OS=Mus musculus GN=Lsm3 PE=2 SV=2//2.84547e-32	GO:0005634//GO:0030529//GO:0071013//GO:0005681	GO:0003723//GO:0005515	GO:0008380//GO:0006397
GOAT_ENSBTAP00000009687	949	1022	933	569	613	639	105.691	115.322	118.312	57.6886	61.7068	63.9694	968	607	113.108	61.1216	-0.887953	1.76e-13	2.71e-12	AIMP2	sp|Q0II26|AIMP2_BOVIN Aminoacyl tRNA synthase complex-interacting multifunctional protein 2 OS=Bos taurus GN=AIMP2 PE=2 SV=1//3.1266e-163	GO:0005737//GO:0005829//GO:0005634	GO:0005515	GO:0008285//GO:0030154//GO:0006915//GO:0006412//GO:0031398//GO:0007275//GO:0060510
GOAT_ENSBTAP00000009693	25	15	11	181	172	164	2.67623	1.62691	1.34076	17.6387	16.6422	15.7807	17	172.333	1.8813	16.6872	3.14894	5.24e-13	7.33e-12	SCAMP1	sp|O77735|SCAM1_PIG Secretory carrier-associated membrane protein 1 OS=Sus scrofa GN=SCAMP1 PE=2 SV=1//0	GO:0030672//GO:0016021//GO:0042589//GO:0045202	GO:0005515	GO:0006887//GO:0015031
GOAT_ENSBTAP00000009702	54	39	30	300	261	286	2.71602	1.98744	1.71804	13.7362	11.8653	12.9301	41	282.333	2.1405	12.8439	2.58506	1.47e-11	1.59e-10	CLIP4	sp|Q8N3C7|CLIP4_HUMAN CAP-Gly domain-containing linker protein 4 OS=Homo sapiens GN=CLIP4 PE=1 SV=1//1.29735e-06	--	GO:0005515	--
GOAT_ENSBTAP00000009769	107	52	46	393	460	459	3.38376	1.66613	1.65633	11.3139	13.1484	13.0475	68.3333	437.333	2.23541	12.5033	2.4837	2e-12	2.52e-11	TRAPPC11	sp|A6QLC7|TPC11_BOVIN Trafficking protein particle complex subunit 11 OS=Bos taurus GN=TRAPPC11 PE=2 SV=1//0
GOAT_ENSBTAP00000009785	33	33	23	218	264	267	1.17288	1.18834	0.930763	7.05341	8.48088	8.52996	29.6667	249.667	1.09733	8.02142	2.86986	1.76e-13	2.71e-12	SEC23IP	sp|Q9Y6Y8|S23IP_HUMAN SEC23-interacting protein OS=Homo sapiens GN=SEC23IP PE=1 SV=1//0	GO:0005737//GO:0005813//GO:0043231	GO:0046872//GO:0005515	--
GOAT_ENSBTAP00000009821	71	46	45	385	359	493	7.66919	5.03429	5.53448	37.8579	35.0497	47.867	54	412.333	6.07932	40.2582	2.7273	1.05e-13	1.7e-12	B3GALNT1	sp|Q864U6|B3GL1_PIG UDP-GalNAc:beta-1,3-N-acetylgalactosaminyltransferase 1 OS=Sus scrofa GN=B3GALNT1 PE=2 SV=1//0
GOAT_ENSBTAP00000009864	19	9	13	183	205	199	1.51415	0.726688	1.1796	13.2762	14.7662	14.255	13.6667	195.667	1.14015	14.0991	3.62832	9.58e-18	3.1e-16	Hnrnph2	sp|Q6AY09|HNRH2_RAT Heterogeneous nuclear ribonucleoprotein H2 OS=Rattus norvegicus GN=Hnrnph2 PE=1 SV=1//0	GO:0005737//GO:0015629//GO:0005634//GO:0030529	GO:0000166//GO:0003676	--
GOAT_ENSBTAP00000009878	93	86	50	388	402	431	17.1914	16.107	10.5238	65.2926	67.1665	71.6148	76.3333	407	14.6074	68.0246	2.21936	1.55e-09	1.15e-08	Cacng7	sp|P62957|CCG7_RAT Voltage-dependent calcium channel gamma-7 subunit OS=Rattus norvegicus GN=Cacng7 PE=1 SV=1//1.28423e-121	GO:0016020	--	GO:2000311//GO:0006816
GOAT_ENSBTAP00000009880	1211	1282	1160	851	882	797	74.4911	79.8983	81.2441	47.6535	49.0375	44.0673	1217.67	843.333	78.5445	46.9194	-0.743325	1.07e-11	1.18e-10	FAAH	sp|O00519|FAAH1_HUMAN Fatty-acid amide hydrolase 1 OS=Homo sapiens GN=FAAH PE=1 SV=2//2.85523e-14	GO:0005737	GO:0016811//GO:0016884//GO:0017064//GO:0047372	GO:0009062
GOAT_ENSBTAP00000009897	129	96	73	637	745	751	13.9763	10.5381	9.00528	62.8268	72.9552	73.1373	99.3333	711	11.1732	69.6398	2.63987	2.23e-16	5.59e-15	mapre2	sp|Q7ZXP1|MARE2_XENLA Microtubule-associated protein RP/EB family member 2 OS=Xenopus laevis GN=mapre2 PE=2 SV=1//2.27151e-41	GO:0005737//GO:0005856//GO:0015630//GO:0005874	GO:0008017//GO:0005515	GO:0007049//GO:0007067//GO:0051301
GOAT_ENSBTAP00000009939	8852	5442	4017	2277	2638	2205	2283.79	1422.53	1180.02	534.788	615.16	511.353	6103.67	2373.33	1628.78	553.767	-1.55644	1.49e-08	9.29e-08	IFI6	sp|Q6IED8|IFI6_BOVIN Interferon alpha-inducible protein 6 OS=Bos taurus GN=IFI6 PE=2 SV=1//1.59912e-37	GO:0016021//GO:0016020//GO:0005739	GO:0005515	GO:0001836//GO:0043154//GO:0043066//GO:0051902
GOAT_ENSBTAP00000009950	102	66	65	344	348	340	7.02088	4.60282	5.09422	21.5553	21.6506	21.0362	77.6667	344	5.57264	21.414	1.94212	9.08e-07	4.12e-06	URI1	sp|Q3B7M7|RMP_BOVIN Unconventional prefoldin RPB5 interactor OS=Bos taurus GN=URI1 PE=2 SV=1//0	GO:0005737//GO:0016272//GO:0005665//GO:0005634	GO:0003682//GO:0051082//GO:0001106//GO:0005515	GO:0071363//GO:0000122//GO:0009615//GO:0001558//GO:0010923//GO:0006357//GO:0006457//GO:0042981//GO:0071383
GOAT_ENSBTAP00000009957	1	2	3	108	124	103	0.0843801	0.170985	0.288227	8.296	9.45716	7.81223	2	111.667	0.181198	8.5218	5.55552	2.21e-20	1.1e-18	TMX3	sp|Q5R875|TMX3_PONAB Protein disulfide-isomerase TMX3 OS=Pongo abelii GN=TMX3 PE=2 SV=1//0	GO:0009986	GO:0005509//GO:0015035//GO:0009055	GO:0006662//GO:0045454
GOAT_ENSBTAP00000009971	131	102	105	978	1322	996	7.70141	6.07559	7.02849	52.3411	70.2473	52.6328	112.667	1098.67	6.93516	58.4071	3.07414	2.48e-17	7.51e-16	KIAA1598	sp|A0MZ66|SHOT1_HUMAN Shootin-1 OS=Homo sapiens GN=KIAA1598 PE=1 SV=4//1.01438e-11	--	GO:0019900	GO:0048812
GOAT_ENSBTAP00000010067	55	20	46	368	342	330	4.28779	1.57976	4.08322	26.117	24.0989	23.1251	40.3333	346.667	3.31692	24.447	2.88174	7.67e-16	1.76e-14	RFTN2	sp|Q5R458|RFTN2_PONAB Raftlin-2 OS=Pongo abelii GN=RFTN2 PE=2 SV=3//1.04455e-11
GOAT_ENSBTAP00000010107	16	9	3	162	146	155	0.71101	0.405217	0.151792	6.55353	5.86418	6.19135	9.33333	154.333	0.422673	6.20302	3.87536	1.17e-16	3.08e-15	MSH3	sp|P20585|MSH3_HUMAN DNA mismatch repair protein Msh3 OS=Homo sapiens GN=MSH3 PE=1 SV=4//0	GO:0000228//GO:0005634//GO:0032302	GO:0032142//GO:0019899//GO:0030983//GO:0003677//GO:0032357//GO:0000403//GO:0032139//GO:0019237//GO:0003697//GO:0005524//GO:0005515//GO:0008094//GO:0000406//GO:0000404//GO:0032181//GO:0003684	GO:0006298//GO:0045910//GO:0006281//GO:0007131//GO:0043570//GO:0051096//GO:0000710//GO:0016447
GOAT_ENSBTAP00000010138	16	19	12	211	199	208	0.984193	1.18414	0.840456	11.8154	11.064	11.5006	15.6667	206	1.00293	11.46	3.51432	2.52e-17	7.62e-16	SHOC2	sp|A6QLV3|SHOC2_BOVIN Leucine-rich repeat protein SHOC-2 OS=Bos taurus GN=SHOC2 PE=2 SV=1//0	GO:0005737//GO:0005634//GO:0000164	GO:0019903//GO:0005515	GO:0046579
GOAT_ENSBTAP00000010176	13730	17826	15516	8210	7083	7379	3730.14	4906.8	4799.63	2030.5	1739.29	1801.98	15690.7	7557.33	4478.86	1857.26	-1.26996	1.18e-09	8.95e-09	UBA52	sp|P0C276|RL40_SHEEP Ubiquitin-60S ribosomal protein L40 OS=Ovis aries GN=UBA52 PE=2 SV=2//3.09195e-23	GO:0005737//GO:0005840//GO:0022625//GO:0005634//GO:0030529	GO:0003735//GO:0005515	GO:0006412
GOAT_ENSBTAP00000010206	35	21	14	208	257	292	2.91219	1.77035	1.32633	15.7551	19.3279	21.839	23.3333	252.333	2.00296	18.974	3.24382	3.22e-16	7.93e-15	SLC1A4	sp|A2VDL4|SATT_BOVIN Neutral amino acid transporter A OS=Bos taurus GN=SLC1A4 PE=2 SV=1//0	GO:0016021//GO:0016020//GO:0005882//GO:0042470	GO:0015184//GO:0015180//GO:0017153//GO:0005254//GO:0015293//GO:0015194//GO:0015195//GO:0015193//GO:0034590//GO:0015175	GO:0015811//GO:0006821//GO:0034589//GO:0006810//GO:0015804//GO:0035524//GO:0006835//GO:0015824//GO:0015825//GO:0015808//GO:0050890//GO:0015826
GOAT_ENSBTAP00000010233	117	84	132	458	578	670	2.57727	1.87475	3.31072	9.18428	11.508	13.2662	111	568.667	2.58758	11.3195	2.12914	8.12e-07	3.72e-06	TRPM1	sp|Q7Z4N2|TRPM1_HUMAN Transient receptor potential cation channel subfamily M member 1 OS=Homo sapiens GN=TRPM1 PE=1 SV=2//4.8075e-08	GO:0016021//GO:0016020//GO:0035841	GO:0005216//GO:0005261	GO:0071482//GO:0046548//GO:0006811//GO:0006810//GO:0007601//GO:0007165//GO:0055085
GOAT_ENSBTAP00000010351	220	101	84	915	949	846	10.3402	4.80967	4.49528	39.1499	40.3153	35.7415	135	903.333	6.54837	38.4022	2.55198	8.02e-16	1.83e-14	STAT1	sp|P42224|STAT1_HUMAN Signal transducer and activator of transcription 1-alpha/beta OS=Homo sapiens GN=STAT1 PE=1 SV=2//5.38366e-07	GO:0005737//GO:0005730//GO:0005634	GO:0004871//GO:0005509//GO:0000983//GO:0003700//GO:0005515	GO:0033209//GO:0007165//GO:0032869//GO:0072136//GO:0006919//GO:0007259//GO:0043124//GO:0008284//GO:0034097//GO:0048661//GO:0008015//GO:0006917//GO:0007584//GO:0060333//GO:0072162//GO:0051591//GO:0045893//GO:0072308//GO:0043434//GO:0006355//GO:0001937//GO:0016525
GOAT_ENSBTAP00000010355	18	17	6	167	179	171	3.96017	3.78948	1.50302	33.4474	35.5954	33.817	13.6667	172.333	3.08422	34.2866	3.47467	3.34e-15	6.9e-14	SNX12	sp|Q9UMY4|SNX12_HUMAN Sorting nexin-12 OS=Homo sapiens GN=SNX12 PE=1 SV=3//4.63673e-115	--	GO:0035091//GO:0005515	GO:0007154
GOAT_ENSBTAP00000010384	194	98	97	908	1082	1028	10.1861	5.21343	5.799	43.4009	51.3493	48.5176	129.667	1006	7.06619	47.7559	2.75668	2.23e-19	9.44e-18	Slc20a1	sp|O97596|S20A1_FELCA Sodium-dependent phosphate transporter 1 OS=Felis catus GN=Slc20a1 PE=2 SV=2//0	GO:0016020//GO:0005886	GO:0005315//GO:0004871	GO:0006817//GO:0007165//GO:0043123
GOAT_ENSBTAP00000010386	79	76	85	271	221	307	12.8311	12.1883	13.7073	48.3507	44.8951	55.4959	80	266.333	12.9089	49.5805	1.94141	1.24e-05	4.58e-05	POMC	sp|P01191|COLI_SHEEP Pro-opiomelanocortin OS=Ovis aries GN=POMC PE=1 SV=1//9.71725e-74	GO:0007218//GO:0032098//GO:0033059//GO:0045944//GO:0007165//GO:0007267//GO:0008217//GO:0006091//GO:0032720	GO:0005737//GO:0005782//GO:0005615//GO:0030141//GO:0005576	GO:0005179//GO:0031782//GO:0070996//GO:0031781//GO:0001664//GO:0005102
GOAT_ENSBTAP00000010389	13607	16113	14691	8141	8270	8681	3189.33	3826.51	3920.69	1737.08	1752.03	1828.96	14803.7	8364	3645.51	1772.69	-1.04018	2.78e-11	2.84e-10	FIS1	sp|Q3T0I5|FIS1_BOVIN Mitochondrial fission 1 protein OS=Bos taurus GN=FIS1 PE=2 SV=1//7.7983e-83	GO:0005777//GO:0031307//GO:0005779//GO:0016021//GO:0016020//GO:0005739//GO:0043234//GO:0005741	GO:0005515//GO:0005102	GO:0000266//GO:0010821//GO:0051561//GO:0016559//GO:0043653//GO:0051260//GO:0035584//GO:0006626//GO:0006915//GO:0043280//GO:0070584//GO:0000422//GO:0007204//GO:0001836//GO:0032471
GOAT_ENSBTAP00000010432	497	370	380	2382	2261	2036	39.0004	29.4174	33.9523	170.161	160.366	143.611	415.667	2226.33	34.1234	158.046	2.21151	4.32e-13	6.16e-12	CALCOCO2	sp|O18737|CACO2_BOVIN Calcium-binding and coiled-coil domain-containing protein 2 OS=Bos taurus GN=CALCOCO2 PE=2 SV=1//5.31364e-14	GO:0005737//GO:0005634//GO:0048471//GO:0005794//GO:0000790//GO:0043231//GO:0005625//GO:0005856	GO:0008022//GO:0043565//GO:0003713//GO:0003712//GO:0070016//GO:0042803//GO:0008013//GO:0030374//GO:0044212//GO:0005515//GO:0003682	GO:0007165//GO:0045893//GO:0030518//GO:0034341//GO:0045944//GO:0006351
GOAT_ENSBTAP00000010436	23	19	20	230	278	232	4.06313	3.40076	4.02287	36.9884	44.3892	36.8399	20.6667	246.667	3.82892	39.4058	3.3634	7.55e-18	2.5e-16	CHMP2B	sp|Q3SX42|CHM2B_BOVIN Charged multivesicular body protein 2b OS=Bos taurus GN=CHMP2B PE=2 SV=1//5.82857e-105	GO:0005737//GO:0016020//GO:0005634//GO:0031902//GO:0005739//GO:0005622//GO:0005768//GO:0005829	GO:0019904	GO:0006810//GO:0015031
GOAT_ENSBTAP00000010466	84	70	50	640	660	575	3.98462	3.3643	2.70054	27.6371	28.2976	24.5173	68	625	3.34982	26.8173	3.00101	1.09e-20	5.71e-19	Top1	sp|Q9WUL0|TOP1_RAT DNA topoisomerase 1 OS=Rattus norvegicus GN=Top1 PE=2 SV=1//0	GO:0005737//GO:0043204//GO:0000932//GO:0005634//GO:0005730//GO:0005654//GO:0000228//GO:0005694	GO:0003917//GO:0005515//GO:0003677//GO:0003682//GO:0003918//GO:0016853	GO:0040016//GO:0042493//GO:0006265//GO:0006260
GOAT_ENSBTAP00000010530	37	14	24	196	193	200	1.69029	0.648002	1.24837	8.15118	7.96922	8.21273	25	196.333	1.19555	8.11104	2.76221	3.3e-11	3.32e-10	TLR2	sp|B2LT62|TLR2_CAPIB Toll-like receptor 2 OS=Capra ibex GN=TLR2 PE=3 SV=1//0	GO:0009897//GO:0016020//GO:0005886//GO:0035355//GO:0005737//GO:0009986//GO:0016021//GO:0031224//GO:0035354//GO:0005622	GO:0051637//GO:0008329//GO:0070891//GO:0046982//GO:0042498//GO:0042497//GO:0004888//GO:0005515//GO:0042834//GO:0004872	GO:0071224//GO:0071223//GO:0071221//GO:0030177//GO:0007165//GO:0032494//GO:0044130//GO:0002752//GO:0007252//GO:0071727//GO:0042535//GO:0009617//GO:0060907//GO:0032700//GO:0002687//GO:0032695//GO:0032722//GO:0002221//GO:0032760//GO:0002755//GO:0045087//GO:0034123//GO:0050830//GO:0006954//GO:0006955//GO:0042892//GO:0052063//GO:0051092//GO:0042346//GO:0050715//GO:0042496//GO:0042495//GO:0045429//GO:…
GOAT_ENSBTAP00000010532	75	22	32	439	413	353	4.86368	1.44549	2.3628	25.9163	24.2077	20.5767	43	401.667	2.89066	23.5669	3.02729	4.68e-18	1.6e-16	FLCN	sp|Q3B7L5|FLCN_BOVIN Folliculin OS=Bos taurus GN=FLCN PE=2 SV=1//0	GO:0005886//GO:0005737//GO:0005634	--	GO:0035065//GO:2001170//GO:0010629//GO:0010628//GO:0007043//GO:0010823//GO:2000973//GO:0001701//GO:0000122//GO:0043065//GO:0045892//GO:0032006//GO:2000506//GO:0030511//GO:0051898//GO:0032008//GO:0032007//GO:0030097//GO:0001932//GO:0070373//GO:0001934
GOAT_ENSBTAP00000010553	124	78	69	738	831	853	4.17935	2.66361	2.64795	22.6438	25.3156	25.8425	90.3333	807.333	3.16364	24.6006	2.95904	1.57e-21	9.31e-20	UBE3C	sp|Q15386|UBE3C_HUMAN Ubiquitin-protein ligase E3C OS=Homo sapiens GN=UBE3C PE=1 SV=3//0	GO:0005622	GO:0016881//GO:0005515//GO:0004842	GO:0006464//GO:0000209
GOAT_ENSBTAP00000010646	2872	3704	3713	1561	1885	1735	241.205	315.182	355.058	119.346	143.091	130.978	3429.67	1727	303.815	131.138	-1.2121	3.97e-07	1.92e-06	NACAD	sp|O15069|NACAD_HUMAN NAC-alpha domain-containing protein 1 OS=Homo sapiens GN=NACAD PE=2 SV=3//1.75512e-125
GOAT_ENSBTAP00000010696	1321	1613	1181	818	721	919	422.974	523.281	430.56	238.435	208.663	264.499	1371.67	819.333	458.938	237.199	-0.952203	3.42e-10	2.85e-09	SLIRP	sp|Q32P59|SLIRP_BOVIN SRA stem-loop-interacting RNA-binding protein, mitochondrial OS=Bos taurus GN=SLIRP PE=3 SV=1//1.09588e-69
GOAT_ENSBTAP00000010706	607	632	648	322	282	309	52.0765	54.9362	63.2996	25.1486	21.8676	23.8292	629	304.333	56.7708	23.6151	-1.26544	4.77e-16	1.14e-14	SMPD2	sp|O60906|NSMA_HUMAN Sphingomyelin phosphodiesterase 2 OS=Homo sapiens GN=SMPD2 PE=1 SV=2//2.22077e-10	--	GO:0004767	--
GOAT_ENSBTAP00000010723	69	73	64	456	498	413	2.38157	2.55285	2.51517	14.3279	15.5361	12.8133	68.6667	455.667	2.48319	14.2258	2.51824	2.96e-13	4.33e-12	CAMSAP2	sp|Q08AD1|CAMP2_HUMAN Calmodulin-regulated spectrin-associated protein 2 OS=Homo sapiens GN=CAMSAP2 PE=1 SV=3//2.69832e-174	GO:0005737//GO:0005915	GO:0008017//GO:0005515//GO:0051011	GO:0022604//GO:0034453//GO:0007010//GO:0010923//GO:0045218//GO:0090136//GO:0070507
GOAT_ENSBTAP00000010797	39	33	37	215	201	213	1.95608	1.67697	2.11299	9.81672	9.11209	9.60286	36.3333	209.667	1.91535	9.51056	2.31192	2.71e-08	1.6e-07	ATMIN	sp|O43313|ATMIN_HUMAN ATM interactor OS=Homo sapiens GN=ATMIN PE=1 SV=2//0	GO:0005622	GO:0044212//GO:0045502//GO:0008270	GO:0045893
GOAT_ENSBTAP00000010805	332	121	111	1767	1752	1885	32.2657	11.9145	12.2828	156.331	153.899	164.669	188	1801.33	18.821	158.3	3.07224	1.14e-26	1.41e-24	Nptn	sp|P97546|NPTN_RAT Neuroplastin OS=Rattus norvegicus GN=Nptn PE=1 SV=2//6.54154e-42
GOAT_ENSBTAP00000010825	58	22	26	571	633	597	7.42846	2.85485	3.79156	66.5751	73.278	68.7295	35.3333	600.333	4.69162	69.5275	3.88943	5.1e-33	1.38e-30	BEND6	sp|Q5SZJ8|BEND6_HUMAN BEN domain-containing protein 6 OS=Homo sapiens GN=BEND6 PE=2 SV=2//1.17815e-10
GOAT_ENSBTAP00000010843	1466	1914	1351	969	1030	1120	125.773	166.373	131.972	75.68	79.871	86.3711	1577	1039.67	141.373	80.6407	-0.809923	4.31e-07	2.08e-06	MRPS5	sp|Q2KID9|RT05_BOVIN 28S ribosomal protein S5, mitochondrial OS=Bos taurus GN=MRPS5 PE=1 SV=1//1.66841e-11	GO:0005794//GO:0005840//GO:0016021//GO:0016020//GO:0005739//GO:0030529//GO:0005622	GO:0003735//GO:0016740//GO:0008378//GO:0003723//GO:0016757	GO:0006486//GO:0006412
GOAT_ENSBTAP00000010912	1864	2064	1755	1100	1072	1123	566.491	635.544	607.292	304.33	294.47	306.778	1894.33	1098.33	603.109	301.859	-0.998542	6.42e-16	1.5e-14	Snrpd1	sp|P62315|SMD1_MOUSE Small nuclear ribonucleoprotein Sm D1 OS=Mus musculus GN=Snrpd1 PE=2 SV=1//2.6757e-10	GO:0005634//GO:0030529//GO:0005681	--	GO:0008380//GO:0006397
GOAT_ENSBTAP00000010928	111	61	42	440	395	458	49.1436	27.363	21.1722	177.338	158.067	182.267	71.3333	431	32.5596	172.557	2.40592	1.78e-11	1.89e-10	FKBP1A	sp|P18203|FKB1A_BOVIN Peptidyl-prolyl cis-trans isomerase FKBP1A OS=Bos taurus GN=FKBP1A PE=1 SV=2//7.07265e-53	GO:0005737//GO:0033017//GO:0005829//GO:0030424	GO:0005528//GO:0003755//GO:0016853	GO:0000413//GO:0006457//GO:0018208//GO:0032513//GO:0042110//GO:0060314
GOAT_ENSBTAP00000010961	854	348	263	5912	7032	6589	147.951	61.0839	51.8785	932.391	1101.12	1026.07	488.333	6511	86.971	1019.86	3.55169	1.82e-40	1.33e-37	Snap25	sp|P60881|SNP25_RAT Synaptosomal-associated protein 25 OS=Rattus norvegicus GN=Snap25 PE=1 SV=1//1.15861e-147	GO:0005737//GO:0005802//GO:0031083//GO:0016020//GO:0030426//GO:0070032//GO:0045202//GO:0005886//GO:0048471//GO:0031201//GO:0030054//GO:0019717	GO:0005515//GO:0000149	GO:0016192//GO:0007269
GOAT_ENSBTAP00000010982	3185	3268	2897	1538	1608	1775	1704.76	1772.25	1765.53	749.403	777.928	853.986	3116.67	1640.33	1747.52	793.772	-1.13851	1.13e-18	4.27e-17	ATOX1	sp|Q9XT28|ATOX1_SHEEP Copper transport protein ATOX1 OS=Ovis aries GN=ATOX1 PE=3 SV=1//1.58123e-10	--	GO:0005507//GO:0016531//GO:0046872//GO:0032767	GO:0006878//GO:0006811//GO:0006810//GO:0030001//GO:0006825
GOAT_ENSBTAP00000011016	1522	1783	2060	931	1056	1219	306.636	363.957	472.552	170.751	192.297	220.755	1788.33	1068.67	381.048	194.601	-0.969455	2.46e-05	8.63e-05	Rbm8a	sp|Q27W01|RBM8A_RAT RNA-binding protein 8A OS=Rattus norvegicus GN=Rbm8a PE=2 SV=1//3.93179e-94	GO:0005737//GO:0016607//GO:0035145//GO:0005634//GO:0005681//GO:0071013	GO:0005515//GO:0000166//GO:0017091//GO:0003676//GO:0003723	GO:0000184//GO:0006810//GO:0006417//GO:0051028//GO:0008380//GO:0006396//GO:0006397
GOAT_ENSBTAP00000011022	61	33	24	292	319	328	8.44616	4.62948	3.78367	36.8059	39.9226	40.8226	39.3333	313	5.61977	39.1837	2.80167	4.9e-14	8.32e-13	PEX11B	sp|Q148K5|PX11B_BOVIN Peroxisomal membrane protein 11B OS=Bos taurus GN=PEX11B PE=2 SV=1//2.47504e-139	GO:0043234//GO:0005779//GO:0016021//GO:0016020//GO:0005739//GO:0005777//GO:0005778	GO:0005515//GO:0042803	GO:0007031//GO:0016559//GO:0051260
GOAT_ENSBTAP00000011070	1104	1714	1415	394	374	445	244.39	384.427	356.651	79.399	74.8315	88.5466	1411	404.333	328.489	80.9257	-2.02118	1.95e-08	1.18e-07	Bcl7c	sp|O08664|BCL7C_MOUSE B-cell CLL/lymphoma 7 protein family member C OS=Mus musculus GN=Bcl7c PE=1 SV=1//7.56261e-08
GOAT_ENSBTAP00000011107	336	216	132	2885	3273	3284	16.2392	10.5771	7.26394	126.933	142.978	142.668	228	3147.33	11.3601	137.527	3.59766	1.08e-39	6.53e-37	NSF	sp|P46459|NSF_HUMAN Vesicle-fusing ATPase OS=Homo sapiens GN=NSF PE=1 SV=3//1.02095e-07	GO:0005737//GO:0005886	GO:0042623//GO:0017111//GO:0000166//GO:0030165//GO:0019905//GO:0005515//GO:0032403//GO:0005524	GO:0006813//GO:0001921
GOAT_ENSBTAP00000011175	616	473	451	2332	2343	2251	10.3907	8.08381	8.66195	35.8096	35.7221	34.1302	513.333	2308.67	9.0455	35.2206	1.96115	1.03e-09	7.92e-09	SON	sp|P18583|SON_HUMAN Protein SON OS=Homo sapiens GN=SON PE=1 SV=4//2.89539e-18	GO:0005634//GO:0005622//GO:0016607	GO:0005515//GO:0003723//GO:0003676//GO:0003725//GO:0050733	GO:0000910//GO:0000073//GO:0051726//GO:0043484//GO:0043066//GO:0000226//GO:0006397
GOAT_ENSBTAP00000011253	16	25	25	139	150	182	3.45653	5.47205	6.14942	27.3364	29.2895	35.3419	22	157	5.026	30.6559	2.60868	3.59e-09	2.5e-08	FAM219A	sp|Q8IW50|F219A_HUMAN Protein FAM219A OS=Homo sapiens GN=FAM219A PE=1 SV=3//6.65896e-12
GOAT_ENSBTAP00000011305	19805	22046	19023	11665	11074	11065	4642.08	5235.48	5076.8	2489.01	2346.07	2331.24	20291.3	11268	4984.79	2388.77	-1.06126	8.82e-18	2.88e-16	Rps14	sp|P62264|RS14_MOUSE 40S ribosomal protein S14 OS=Mus musculus GN=Rps14 PE=2 SV=3//4.90009e-31
GOAT_ENSBTAP00000011320	78	63	44	417	347	446	3.27925	2.68355	2.10623	15.9596	13.1859	16.8544	61.6667	403.333	2.68968	15.3333	2.51116	1.84e-12	2.33e-11	PALD1	sp|Q9ULE6|PALD_HUMAN Paladin OS=Homo sapiens GN=PALD1 PE=1 SV=3//0	--	GO:0005515	--
GOAT_ENSBTAP00000011377	3771	3974	3068	2695	2819	2961	357.762	381.992	331.41	232.756	241.73	252.507	3604.33	2825	357.055	242.331	-0.559165	7.54e-10	5.91e-09	MAP2K2	sp|Q1HG70|MP2K2_CANFA Dual specificity mitogen-activated protein kinase kinase 2 OS=Canis familiaris GN=MAP2K2 PE=2 SV=1//0	GO:0005783//GO:0005874//GO:0016605//GO:0005778//GO:0005964//GO:0005813//GO:0005634//GO:0016020//GO:0048471//GO:0005737//GO:0009898//GO:0005911//GO:0005829	GO:0051019//GO:0032947//GO:0000287//GO:0000166//GO:0004674//GO:0016740//GO:0004713//GO:0004672//GO:0097110//GO:0005524//GO:0005515//GO:0030165//GO:0043539//GO:0016772//GO:0004689//GO:0004707//GO:0005516//GO:0016301//GO:0004715//GO:0016773	GO:0034115//GO:0018105//GO:0016310//GO:0030154//GO:0060631//GO:0045765//GO:0035038//GO:0071902//GO:0032496//GO:0007067//GO:0007049//GO:0009103//GO:0036003//GO:0000165//GO:0051247//GO:0043066//GO:2000147//GO:0002224//GO:0045736//GO:0006468//GO:0070301//GO:0060548//GO:0006915//GO:0006950//GO:0060761//GO:0071363//GO:0051534//GO:0044351//GO:0007143//GO:0071560//GO:0045944//GO:0005978
GOAT_ENSBTAP00000011388	1710	1582	1503	741	808	826	207.173	194.193	207.334	81.726	88.4805	89.9529	1598.33	791.667	202.9	86.7198	-1.22633	1.18e-19	5.27e-18	SULT1A1	sp|P50227|ST1A1_BOVIN Sulfotransferase 1A1 OS=Bos taurus GN=SULT1A1 PE=1 SV=2//1.15973e-16	GO:0005737	GO:0000166//GO:0016740//GO:0008146//GO:0004062	GO:0006629//GO:0006584//GO:0008202
GOAT_ENSBTAP00000011390	21	5	8	370	376	379	1.17122	0.282538	0.508021	18.7856	18.9542	19.0001	11.3333	375	0.653925	18.9133	4.85413	1.5e-37	7.55e-35	Pde4b	sp|P14646|PDE4B_RAT cAMP-specific 3&apos;,5&apos;-cyclic phosphodiesterase 4B OS=Rattus norvegicus GN=Pde4b PE=1 SV=4//4.72541e-10	GO:0071944	GO:0016787//GO:0008081//GO:0004114//GO:0003824//GO:0046872	GO:0030593//GO:0050900//GO:0035690//GO:0007165//GO:0008152//GO:0071222//GO:0001780
GOAT_ENSBTAP00000011402	44	23	17	239	196	209	2.7019	1.43098	1.18861	13.3604	10.8786	11.5361	28	214.667	1.77383	11.925	2.74905	2.11e-11	2.2e-10	KLHL1	sp|Q9NR64|KLHL1_HUMAN Kelch-like protein 1 OS=Homo sapiens GN=KLHL1 PE=2 SV=1//2.63587e-07	GO:0005737//GO:0030425//GO:0043025	GO:0005515	GO:0007626//GO:0016358//GO:0007628//GO:0021680
GOAT_ENSBTAP00000011403	7984	9086	5941	4094	3966	4278	1301.45	1500.61	1102.65	607.518	584.33	626.823	7670.33	4112.67	1301.57	606.224	-1.10233	1.21e-11	1.33e-10	PRDX5	sp|Q9BGI1|PRDX5_BOVIN Peroxiredoxin-5, mitochondrial OS=Bos taurus GN=PRDX5 PE=2 SV=2//3.64034e-139	GO:0005782//GO:0005737//GO:0031410//GO:0005777//GO:0005739//GO:0048471//GO:0043231//GO:0005829//GO:0044445//GO:0005634	GO:0001016//GO:0046983//GO:0051920//GO:0016491//GO:0072541//GO:0043027//GO:0016209//GO:0004601//GO:0005102	GO:2001057//GO:0042744//GO:0032967//GO:0070995//GO:0006979//GO:0060785//GO:0043066//GO:0034614//GO:2001141//GO:0016480//GO:0055114//GO:0051354//GO:0043154
GOAT_ENSBTAP00000011458-D2	2993	3816	3395	1195	1053	1382	1883.05	2432.49	2432.02	684.427	598.8	781.556	3401.33	1210	2249.19	688.261	-1.70838	1.48e-12	1.92e-11	UQCR11	sp|P07552|QCR10_BOVIN Cytochrome b-c1 complex subunit 10 OS=Bos taurus GN=UQCR11 PE=1 SV=2//6.34415e-20	GO:0016021//GO:0016020//GO:0005739//GO:0005743//GO:0070469	GO:0008121//GO:0009055	GO:0022900
GOAT_ENSBTAP00000011475	94	75	88	412	366	380	7.05227	5.70101	7.51722	28.1386	24.8188	25.6261	85.6667	386	6.75683	26.1945	1.95485	2.96e-07	1.47e-06	GPC5	sp|P78333|GPC5_HUMAN Glypican-5 OS=Homo sapiens GN=GPC5 PE=1 SV=1//0	GO:0031225//GO:0016020//GO:0005578//GO:0005886	GO:0043395	--
GOAT_ENSBTAP00000011533	73	39	49	368	325	349	3.72919	2.01858	2.85011	17.1137	15.0063	16.0256	53.6667	347.333	2.86596	16.0486	2.48535	1.13e-11	1.24e-10	2017-03-07	sp|Q9H992|MARH7_HUMAN E3 ubiquitin-protein ligase MARCH7 OS=Homo sapiens GN=MARCH7 PE=1 SV=1//2.60564e-16	--	GO:0008270	--
GOAT_ENSBTAP00000011540	107	47	39	359	311	346	6.4167	2.85572	2.66297	19.5987	16.8573	18.651	64.3333	338.667	3.97846	18.369	2.20699	9.41e-09	6.09e-08	CDC23	sp|A1A4R8|CDC23_BOVIN Cell division cycle protein 23 homolog OS=Bos taurus GN=CDC23 PE=2 SV=1//2.60976e-31	GO:0005622//GO:0005680	GO:0005515	GO:0070979//GO:0000080//GO:0016567//GO:0007080//GO:0051301//GO:0007067//GO:0030071//GO:0007049
GOAT_ENSBTAP00000011549	48	48	36	212	262	277	2.09156	2.11914	1.7861	8.40949	10.3188	10.8494	44	250.333	1.99893	9.85924	2.30225	8.83e-09	5.74e-08	SLC9A1	sp|Q28036|SL9A1_BOVIN Sodium/hydrogen exchanger 1 OS=Bos taurus GN=SLC9A1 PE=2 SV=1//0
GOAT_ENSBTAP00000011603	299	159	154	955	879	908	22.5739	12.1625	13.2382	65.6362	59.9823	61.6196	204	914	15.9915	62.4127	1.96453	1.25e-08	7.89e-08	GPBP1L1	sp|Q5R9C3|GPBL1_PONAB Vasculin-like protein 1 OS=Pongo abelii GN=GPBP1L1 PE=2 SV=1//0
GOAT_ENSBTAP00000011617	140	119	104	1209	1191	1193	5.07646	4.37189	4.29378	39.9084	39.034	38.884	121	1197.67	4.58071	39.2755	3.09999	6.16e-26	7.06e-24	NBR1	sp|Q14596|NBR1_HUMAN Next to BRCA1 gene 1 protein OS=Homo sapiens GN=NBR1 PE=1 SV=3//0	GO:0000407//GO:0005829//GO:0005770//GO:0005776	GO:0051019//GO:0043130//GO:0008270//GO:0005515	GO:0051259//GO:0016236//GO:0032872//GO:0030500//GO:0045668
GOAT_ENSBTAP00000011671	143	63	66	934	886	842	9.06043	4.04429	4.76135	53.8721	50.7394	47.9538	90.6667	887.333	5.95535	50.8551	3.09413	5.02e-24	4.59e-22	TMEM87A	sp|Q8NBN3|TM87A_HUMAN Transmembrane protein 87A OS=Homo sapiens GN=TMEM87A PE=1 SV=3//1.64735e-06	GO:0016021	--	--
GOAT_ENSBTAP00000011688	27	37	22	179	215	243	2.4891	3.45597	2.30927	15.0223	17.915	20.1365	28.6667	212.333	2.75145	17.6913	2.68477	4.79e-11	4.68e-10	APBA1	sp|Q02410|APBA1_HUMAN Amyloid beta A4 precursor protein-binding family A member 1 OS=Homo sapiens GN=APBA1 PE=1 SV=3//2.45535e-09	GO:0016020//GO:0005622	GO:0005515	GO:0007626//GO:0001701//GO:0035264//GO:0006886//GO:0014047//GO:0014051//GO:0007268//GO:0010468
GOAT_ENSBTAP00000011762	7145	8296	7475	3681	3415	3630	1601.44	1883.94	1907.63	751.069	691.829	731.33	7638.67	3575.33	1797.67	724.743	-1.31059	2.33e-15	4.98e-14	PFDN5	sp|Q8HYI9|PFD5_BOVIN Prefoldin subunit 5 OS=Bos taurus GN=PFDN5 PE=2 SV=1//4.84359e-07	GO:0005829//GO:0016272//GO:0005634	GO:0051082//GO:0005515	GO:0090090//GO:0006457//GO:0051086//GO:0045892//GO:0060041
GOAT_ENSBTAP00000011776	1794	1740	1431	1056	1051	1180	194.956	191.581	177.063	104.468	103.233	115.264	1655	1095.67	187.867	107.655	-0.803296	6.34e-13	8.74e-12	Sdsl	sp|Q8R238|SDSL_MOUSE Serine dehydratase-like OS=Mus musculus GN=Sdsl PE=2 SV=1//6.2471e-11	GO:0005739	GO:0003824//GO:0030170	GO:0008152
GOAT_ENSBTAP00000011783	98	43	43	356	276	222	6.81091	3.02787	3.40268	22.5234	17.3375	13.8685	61.3333	284.667	4.41382	17.9098	2.02065	0.000153761	0.000470462	ALPL	sp|P09487|PPBT_BOVIN Alkaline phosphatase, tissue-nonspecific isozyme OS=Bos taurus GN=ALPL PE=1 SV=2//1.57668e-15	GO:0016020//GO:0005886//GO:0044420//GO:0031225	GO:0016787//GO:0016791//GO:0016462//GO:0004035//GO:0003824//GO:0046872	GO:0001958//GO:0016311//GO:0071407//GO:0003006//GO:0046677//GO:0008152//GO:0033280
GOAT_ENSBTAP00000011802	973	398	413	4952	4544	5100	155.081	64.2715	74.9497	718.509	654.612	730.659	594.667	4865.33	98.1008	701.26	2.83761	1.84e-24	1.81e-22	Tspan7	sp|Q62283|TSN7_MOUSE Tetraspanin-7 OS=Mus musculus GN=Tspan7 PE=2 SV=2//3.3374e-51	GO:0016021//GO:0016020	--	--
GOAT_ENSBTAP00000011803	42	12	19	328	330	301	8.05447	2.33162	4.14872	57.2619	57.2006	51.8862	24.3333	319.667	4.84494	55.4496	3.51663	1.45e-21	8.62e-20	RAP1B	sp|Q5RDM6|RAP1B_PONAB Ras-related protein Rap-1b OS=Pongo abelii GN=RAP1B PE=2 SV=1//6.88266e-32	GO:0005737//GO:0005811//GO:0005829//GO:0016020//GO:0005622//GO:0005911//GO:0005886//GO:0030054	GO:0005515//GO:0000166//GO:0003924//GO:0019003//GO:0005525	GO:0008283//GO:0006886//GO:0006913//GO:0007165//GO:0015031//GO:0006184//GO:0007264//GO:2000114
GOAT_ENSBTAP00000011818	164	149	79	1019	1133	1124	12.5401	11.5433	6.87791	70.9308	78.3042	77.2539	130.667	1092	10.3204	75.4963	2.8709	2.09e-21	1.21e-19	USP22	sp|P0C8Z3|UBP22_BOVIN Ubiquitin carboxyl-terminal hydrolase 22 OS=Bos taurus GN=USP22 PE=2 SV=1//2.48216e-07	GO:0000124//GO:0005634//GO:0070461	GO:0008270//GO:0008233//GO:0008234//GO:0004221//GO:0003713//GO:0010485//GO:0046872//GO:0016787//GO:0030374//GO:0004843//GO:0005515	GO:0007049//GO:0016574//GO:0006508//GO:0016579//GO:0016578//GO:0045931//GO:0043967//GO:0045893//GO:0006355//GO:0006511//GO:0006351//GO:0016568
GOAT_ENSBTAP00000011940	52	28	29	232	292	208	3.60696	1.96782	2.29039	14.6498	18.3071	12.9688	36.3333	244	2.62173	15.3086	2.54575	1.49e-10	1.32e-09	FAR1	sp|Q5R834|FACR1_PONAB Fatty acyl-CoA reductase 1 OS=Pongo abelii GN=FAR1 PE=2 SV=1//4.19213e-15	GO:0005778//GO:0005777	GO:0050662//GO:0016620//GO:0000166//GO:0003824//GO:0050062	GO:0044237//GO:0055114//GO:0010025//GO:0046474//GO:0035336//GO:0008611
GOAT_ENSBTAP00000011949	106	31	57	490	378	466	3.04593	0.902538	1.86493	12.8179	9.8176	12.0364	64.6667	444.667	1.9378	11.5573	2.57631	4.83e-13	6.8e-12	Map3k5	sp|O35099|M3K5_MOUSE Mitogen-activated protein kinase kinase kinase 5 OS=Mus musculus GN=Map3k5 PE=1 SV=3//1.18959e-12	--	GO:0000287//GO:0000166//GO:0004674//GO:0016740//GO:0004713//GO:0004672//GO:0005524//GO:0042803//GO:0016301//GO:0019901//GO:0019903//GO:0008656//GO:0016772//GO:0042802//GO:0005515//GO:0004709	GO:0000187//GO:0000186//GO:0016310//GO:0010941//GO:0007254//GO:0000165//GO:0043065//GO:0010421//GO:0043280//GO:0006468//GO:0070301//GO:0006919//GO:0008631
GOAT_ENSBTAP00000011952	13	23	15	176	148	150	0.963223	1.72664	1.26546	11.8714	9.91162	9.99017	17	158	1.31844	10.5911	3.00594	1.25e-11	1.36e-10	DDX6	sp|P26196|DDX6_HUMAN Probable ATP-dependent RNA helicase DDX6 OS=Homo sapiens GN=DDX6 PE=1 SV=2//1.23031e-15	GO:0005737//GO:0010494//GO:0000932//GO:0016442	GO:0008026//GO:0016787//GO:0000166//GO:0005515//GO:0003676//GO:0004386//GO:0005524	GO:0033962
GOAT_ENSBTAP00000011977	56	35	37	436	462	410	4.71419	2.98522	3.54645	33.4126	35.1528	31.0242	42.6667	436	3.74862	33.1966	3.1466	3.03e-20	1.47e-18	SLC35A5	sp|A6QPI1|S35A5_BOVIN Probable UDP-sugar transporter protein SLC35A5 OS=Bos taurus GN=SLC35A5 PE=2 SV=1//0	GO:0016021//GO:0016020//GO:0000139	GO:0005351//GO:0005338	GO:0015780//GO:0008643//GO:0006810//GO:0055085
GOAT_ENSBTAP00000012005	49	22	26	335	302	317	2.33052	1.06016	1.40801	14.5047	12.9827	13.5524	32.3333	318	1.59956	13.6799	3.09631	3.19e-17	9.48e-16	CASD1	sp|Q96PB1|CASD1_HUMAN CAS1 domain-containing protein 1 OS=Homo sapiens GN=CASD1 PE=2 SV=1//0	--	GO:0005515	--
GOAT_ENSBTAP00000012028	86	169	75	1067	1221	1265	8.15898	16.2448	8.10162	92.1524	104.701	107.876	110	1184.33	10.8351	101.577	3.22878	4.7e-28	6.73e-26	TSPYL4	sp|Q9UJ04|TSYL4_HUMAN Testis-specific Y-encoded-like protein 4 OS=Homo sapiens GN=TSPYL4 PE=2 SV=2//0	GO:0005737//GO:0005730//GO:0005813//GO:0005886//GO:0005634	--	GO:0030308//GO:0006334//GO:0045859//GO:0008156
GOAT_ENSBTAP00000012059	38	30	12	319	298	314	1.86933	1.49524	0.672134	14.2856	13.25	13.8845	26.6667	310.333	1.34557	13.8067	3.35908	1.71e-19	7.33e-18	Spon1	sp|P35446|SPON1_RAT Spondin-1 OS=Rattus norvegicus GN=Spon1 PE=1 SV=1//3.63654e-14	GO:0005576//GO:0005578	--	GO:0007155
GOAT_ENSBTAP00000012095	178	100	76	1126	1449	1469	32.5681	18.538	15.8329	187.55	239.63	241.598	118	1348	22.313	222.926	3.32061	1.15e-23	9.63e-22	Nrsn1	sp|P97799|NRSN1_MOUSE Neurensin-1 OS=Mus musculus GN=Nrsn1 PE=2 SV=1//7.58507e-34	GO:0016023//GO:0043025//GO:0043005//GO:0030426	--	GO:0007399
GOAT_ENSBTAP00000012098	68	31	40	258	320	297	6.4856	2.99566	4.34385	22.4009	27.5861	25.4622	46.3333	291.667	4.60837	25.1497	2.44822	1.49e-10	1.33e-09	INPP5A	sp|Q14642|I5P1_HUMAN Type I inositol 1,4,5-trisphosphate 5-phosphatase OS=Homo sapiens GN=INPP5A PE=2 SV=1//0	--	GO:0042731	GO:0046854
GOAT_ENSBTAP00000012108	37	40	28	281	308	329	1.29578	1.41931	1.1165	8.9586	9.74942	10.3567	35	306	1.2772	9.68825	2.92325	2.63e-15	5.57e-14	GART	sp|Q59A32|PUR2_BOVIN Trifunctional purine biosynthetic protein adenosine-3 OS=Bos taurus GN=GART PE=2 SV=1//0	GO:0005737	GO:0016742//GO:0046872//GO:0004641//GO:0004644//GO:0016740//GO:0000166//GO:0003824//GO:0004637//GO:0008168//GO:0016874//GO:0005524	GO:0009113//GO:0009058//GO:0006189//GO:0008152//GO:0006164//GO:0032259
GOAT_ENSBTAP00000012137	66	31	23	313	266	247	6.32851	3.01168	2.51107	27.3216	23.0536	21.2889	40	275.333	3.95042	23.888	2.59621	2.23e-11	2.32e-10	TCTN1	sp|Q2MV58|TECT1_HUMAN Tectonic-1 OS=Homo sapiens GN=TCTN1 PE=2 SV=2//0
GOAT_ENSBTAP00000012301	3060	2909	2562	1954	1735	1863	303.979	292.789	289.784	176.706	155.783	166.354	2843.67	1850.67	295.517	166.281	-0.829619	1.36e-13	2.15e-12	AMZ2	sp|Q4R684|AMZ2_MACFA Archaemetzincin-2 OS=Macaca fascicularis GN=AMZ2 PE=2 SV=2//2.4824e-18	--	GO:0008270//GO:0008237	GO:0006508
GOAT_ENSBTAP00000012308	521	227	257	2114	2466	2511	42.7548	18.8739	24.0134	157.927	182.911	185.222	335	2363.67	28.5474	175.353	2.61883	1.98e-19	8.42e-18	ATXN10	sp|Q2TBW0|ATX10_BOVIN Ataxin-10 OS=Bos taurus GN=ATXN10 PE=2 SV=1//6.35629e-13	GO:0005737//GO:0030425//GO:0048471//GO:0043025	GO:0005488//GO:0005515	GO:0007399//GO:0031175
GOAT_ENSBTAP00000012316	80	126	90	603	575	546	11.2067	17.8833	14.3551	76.8973	72.8041	68.7511	98.6667	574.667	14.4817	72.8175	2.33005	5.34e-12	6.21e-11	Mtss1l	sp|Q6P9S0|MTSSL_MOUSE MTSS1-like protein OS=Mus musculus GN=Mtss1l PE=1 SV=1//5.49719e-132	--	GO:0008093//GO:0017124	GO:0046847//GO:0007165
GOAT_ENSBTAP00000012331	48	25	22	266	294	265	4.91816	2.59532	2.56659	24.8112	27.2275	24.4065	31.6667	275	3.36002	25.4817	2.92292	1.88e-14	3.43e-13	Rragc	sp|Q99K70|RRAGC_MOUSE Ras-related GTP-binding protein C OS=Mus musculus GN=Rragc PE=2 SV=1//0	GO:0005737//GO:0005634//GO:0005764	GO:0003924//GO:0019003//GO:0005515//GO:0046982//GO:0005525	GO:0006184
GOAT_ENSBTAP00000012415	272	211	162	914	1042	1032	10.0353	7.88741	6.80536	30.6983	34.748	34.2248	215	996	8.2427	33.2237	2.01102	2.51e-09	1.79e-08	SMG5	sp|Q9UPR3|SMG5_HUMAN Protein SMG5 OS=Homo sapiens GN=SMG5 PE=1 SV=3//0	GO:0005737//GO:0005634	GO:0051721//GO:0005515	GO:0035303
GOAT_ENSBTAP00000012432	75	26	45	417	451	469	3.40027	1.1943	2.32294	17.2105	18.4811	19.1128	48.6667	445.667	2.30584	18.2681	2.98596	1.79e-18	6.5e-17	USP10	sp|A5PJS6|UBP10_BOVIN Ubiquitin carboxyl-terminal hydrolase 10 OS=Bos taurus GN=USP10 PE=2 SV=1//0	GO:0005737//GO:0045111//GO:0005634//GO:0005768//GO:0005769	GO:0044325//GO:0008234//GO:0042980//GO:0004197//GO:0016787//GO:0004221//GO:0004843//GO:0002039//GO:0005515//GO:0008233	GO:0006281//GO:0006508//GO:0010506//GO:0030330//GO:0006914//GO:0006974//GO:0016579//GO:0006511
GOAT_ENSBTAP00000012481	1178	1189	1049	811	744	785	256.03	261.828	259.594	160.461	146.156	153.36	1138.67	780	259.15	153.326	-0.757188	6.96e-12	7.96e-11	Polr2g	sp|P62489|RPB7_RAT DNA-directed RNA polymerase II subunit RPB7 OS=Rattus norvegicus GN=Polr2g PE=2 SV=1//3.24338e-107	GO:0005634//GO:0005665	GO:0004672//GO:0003899//GO:0003723	GO:0006468//GO:0006351//GO:0006366
GOAT_ENSBTAP00000012485	1309	1566	1523	686	642	748	265.213	321.467	351.341	126.527	117.568	136.225	1466	692	312.674	126.773	-1.30241	1.35e-10	1.21e-09	TMEM223	sp|A5PJW2|TM223_BOVIN Transmembrane protein 223 OS=Bos taurus GN=TMEM223 PE=2 SV=1//1.19589e-43	GO:0005739	--	--
GOAT_ENSBTAP00000012489	1225	1373	1159	845	885	900	113.809	129.241	122.602	71.4666	74.3163	75.1592	1252.33	876.667	121.884	73.6474	-0.726806	1.66e-11	1.77e-10	WDR74	sp|Q58D06|WDR74_BOVIN WD repeat-containing protein 74 OS=Bos taurus GN=WDR74 PE=2 SV=1//2.56766e-41	GO:0005634//GO:0005730	GO:0005515	GO:0016070//GO:0001825
GOAT_ENSBTAP00000012497	67	64	44	258	294	272	3.0261	2.92872	2.26274	10.608	12.002	11.0427	58.3333	274.667	2.73919	11.2176	2.03394	6.03e-07	2.82e-06	STAT5A	sp|Q95115|STA5A_BOVIN Signal transducer and activator of transcription 5A OS=Bos taurus GN=STAT5A PE=2 SV=2//5.51173e-08	GO:0005737//GO:0005634	GO:0003677//GO:0004871//GO:0035259//GO:0005509//GO:0005515//GO:0003700//GO:0000979	GO:0045931//GO:0006631//GO:0019218//GO:0019221//GO:0007595//GO:0030155//GO:0046543//GO:0018108//GO:0045885//GO:0007165//GO:0019915//GO:0045588//GO:0045579//GO:0032355//GO:0050729//GO:0006549//GO:0045647//GO:0042448//GO:0006107//GO:0007259//GO:0043029//GO:0032825//GO:0070669//GO:0043066//GO:0030856//GO:0006101//GO:0032819//GO:0045621//GO:0046449//GO:0030879//GO:0008284//GO:0000255//GO:0046544//GO:…
GOAT_ENSBTAP00000012523	7729	7464	7080	4534	3858	4303	4817.07	4190.59	3401.08	1341.39	1271.2	1631.85	6757.67	4231.67	4136.25	1414.81	-1.54793	2.17e-06	9.21e-06	DBI	sp|P07107|ACBP_BOVIN Diazepam-binding inhibitor OS=Bos taurus GN=DBI PE=1 SV=2//8.08074e-53	GO:0005739	GO:0008289//GO:0000062	GO:0006641//GO:0001942//GO:0006810//GO:0043588
GOAT_ENSBTAP00000012544	15739	15269	14562	10514	11530	10209	2213.43	2175.65	2331.76	1346.05	1465.61	1290.54	15190	10751	2240.28	1367.4	-0.712245	4.49e-12	5.29e-11	RPS2	sp|O18789|RS2_BOVIN 40S ribosomal protein S2 OS=Bos taurus GN=RPS2 PE=2 SV=2//4.86803e-12	GO:0005840//GO:0030529//GO:0005654//GO:0005622//GO:0022627//GO:0015935	GO:0003735//GO:0017134//GO:0003723//GO:0005515	GO:0006412
GOAT_ENSBTAP00000012551	196	97	123	725	615	615	17.3552	8.70232	12.4009	58.4409	49.2207	48.9494	138.667	651.667	12.8195	52.2037	2.02581	7.91e-09	5.19e-08	SUCLG2	sp|Q3MHX5|SUCB2_BOVIN Succinyl-CoA ligase [GDP-forming] subunit beta, mitochondrial OS=Bos taurus GN=SUCLG2 PE=2 SV=1//0	GO:0005739	GO:0000166//GO:0003824//GO:0004776//GO:0016874//GO:0005524//GO:0005525	GO:0006099//GO:0008152
GOAT_ENSBTAP00000012605	216	114	125	1045	1139	1042	7.23934	3.87114	4.77011	31.8835	34.5039	31.3914	151.667	1075.33	5.29353	32.5929	2.62226	1.21e-17	3.86e-16	PTK2	sp|Q05397|FAK1_HUMAN Focal adhesion kinase 1 OS=Homo sapiens GN=PTK2 PE=1 SV=2//0	GO:0005829//GO:0005925//GO:0030027//GO:0005737//GO:0016324//GO:0005634//GO:0005856	GO:0042169//GO:0004871//GO:0016740//GO:0000166//GO:0004713//GO:0004672//GO:0005524//GO:0008432//GO:0016301//GO:0019901//GO:0016772//GO:0004715	GO:0008284//GO:0016310//GO:0030335//GO:0018108//GO:0000226//GO:0007165//GO:0060396//GO:0001525//GO:0051897//GO:0046777//GO:0043542//GO:0040023//GO:0001568//GO:0033628//GO:0045667//GO:0043066//GO:0021955//GO:0042127//GO:0006468//GO:0046621//GO:0008360//GO:0014068//GO:0048013//GO:0001570//GO:0050771//GO:0007229//GO:2000060//GO:0030198//GO:0051964//GO:0001764//GO:0045860//GO:0001934//GO:0007172
GOAT_ENSBTAP00000012612	78	67	60	414	403	393	3.21517	2.79817	2.81601	15.5351	15.0146	14.5613	68.3333	403.333	2.94312	15.037	2.3531	5.69e-11	5.48e-10	PPP6R3	sp|Q5H9R7|PP6R3_HUMAN Serine/threonine-protein phosphatase 6 regulatory subunit 3 OS=Homo sapiens GN=PPP6R3 PE=1 SV=2//0	--	GO:0019903//GO:0005515//GO:0005488	GO:0043666
GOAT_ENSBTAP00000012721	76	28	39	289	375	343	7.46706	2.7873	4.36289	25.8487	33.3017	30.292	47.6667	335.667	4.87242	29.8141	2.61329	1.1e-12	1.45e-11	LPAR1	sp|Q92633|LPAR1_HUMAN Lysophosphatidic acid receptor 1 OS=Homo sapiens GN=LPAR1 PE=1 SV=3//1.60005e-62	GO:0030139//GO:0009986//GO:0016021	GO:0004930//GO:0005515//GO:0070915//GO:0030165//GO:0004871//GO:0004872	GO:0000187//GO:0032060//GO:0043410//GO:0035025//GO:0007165//GO:0007186//GO:0043123
GOAT_ENSBTAP00000012722	33	45	39	397	406	368	0.82297	1.13703	1.10741	9.01292	9.15156	8.24928	39	390.333	1.02247	8.80459	3.1062	3.99e-19	1.62e-17	TNS3	sp|Q68CZ2|TENS3_HUMAN Tensin-3 OS=Homo sapiens GN=TNS3 PE=1 SV=2//0	--	GO:0016791//GO:0005515	GO:0008284//GO:0048286//GO:0016311//GO:0016477
GOAT_ENSBTAP00000012742	40	36	15	246	249	246	3.41539	3.11438	1.45829	19.1214	19.2167	18.8805	30.3333	247	2.66269	19.0728	2.84057	5.93e-13	8.2e-12	Tmem184b	sp|Q8BG09|T184B_MOUSE Transmembrane protein 184B OS=Mus musculus GN=Tmem184b PE=2 SV=1//8.57128e-10	GO:0016021//GO:0016020	--	--
GOAT_ENSBTAP00000012773	3700	3897	3268	2788	2450	2320	589.723	629.312	593.064	404.524	352.949	332.378	3621.67	2519.33	604.033	363.284	-0.733532	3.22e-12	3.91e-11	Psma6	sp|P60901|PSA6_RAT Proteasome subunit alpha type-6 OS=Rattus norvegicus GN=Psma6 PE=1 SV=1//1.33611e-163	GO:0005737//GO:0005839//GO:0019773//GO:0005634//GO:0000932//GO:0005739//GO:0005844//GO:0000502//GO:0016363	GO:0004175//GO:0016787//GO:0004298//GO:0003723//GO:0005515//GO:0008233//GO:0051059	GO:0051603//GO:0051092//GO:0006511//GO:0006508
GOAT_ENSBTAP00000012810	2189	2261	2211	1071	905	1111	1330.52	1392.41	1530.17	592.613	497.193	607	2220.33	1029	1417.7	565.602	-1.32569	1.04e-21	6.48e-20	USMG5	sp|Q3ZBI7|USMG5_BOVIN Up-regulated during skeletal muscle growth protein 5 OS=Bos taurus GN=USMG5 PE=1 SV=1//9.58511e-12	GO:0016021//GO:0016020//GO:0005753//GO:0005739//GO:0031966	--	--
GOAT_ENSBTAP00000012812	159	53	72	712	790	816	9.40922	3.17776	4.85135	38.3567	42.2554	43.4055	94.6667	772.667	5.81278	41.3392	2.83021	2.48e-19	1.04e-17	RPA1	sp|P27694|RFA1_HUMAN Replication protein A 70 kDa DNA-binding subunit OS=Homo sapiens GN=RPA1 PE=1 SV=2//0	GO:0005737//GO:0005634//GO:0016605//GO:0000800//GO:0000793//GO:0005662//GO:0000794//GO:0001673//GO:0015629	GO:0005515//GO:0003677//GO:0003682//GO:0003676	GO:0008284//GO:0007126//GO:0001701//GO:0048873//GO:0051276//GO:0000724//GO:0006260//GO:0030097
GOAT_ENSBTAP00000012872	150	106	75	1642	1774	1613	13.864	9.92641	7.89281	138.158	148.201	134.008	110.333	1676.33	10.5611	140.122	3.72985	1.54e-39	9.08e-37	Actr2	sp|P61161|ARP2_MOUSE Actin-related protein 2 OS=Mus musculus GN=Actr2 PE=1 SV=1//0	GO:0030478//GO:0005938	--	GO:0051321//GO:0030036//GO:0007163//GO:0033206//GO:0008356//GO:0051653//GO:0016482
GOAT_ENSBTAP00000012891	105	180	174	692	956	689	53.7923	93.4314	101.497	322.732	442.678	317.284	153	779	82.9069	360.898	2.12203	4.62e-06	1.84e-05	MOBP	sp|Q13875|MOBP_HUMAN Myelin-associated oligodendrocyte basic protein OS=Homo sapiens GN=MOBP PE=2 SV=2//2.43171e-44	GO:0005737//GO:0043231//GO:0005730//GO:0005634//GO:0005739	GO:0019911	--
GOAT_ENSBTAP00000012920	3692	3785	3685	1766	1611	1816	1521.85	1580.76	1729.5	662.682	600.212	672.858	3720.67	1731	1610.7	645.251	-1.31976	4.91e-22	3.25e-20	SF3B5	sp|Q9BWJ5|SF3B5_HUMAN Splicing factor 3B subunit 5 OS=Homo sapiens GN=SF3B5 PE=1 SV=1//3.03925e-61	GO:0005689//GO:0005634//GO:0005681	--	GO:0008380//GO:0006397
GOAT_ENSBTAP00000013008	68	45	44	331	415	467	5.90456	3.95896	4.35016	26.1645	32.5706	36.4497	52.3333	404.333	4.73789	31.7283	2.74345	9.76e-14	1.58e-12	BHLHE40	sp|B3F209|BHE40_SHEEP Class E basic helix-loop-helix protein 40 OS=Ovis aries GN=BHLHE40 PE=2 SV=1//3.22982e-08	GO:0005634//GO:0005794//GO:0005730	GO:0003677//GO:0043425//GO:0070888//GO:0043426//GO:0001078//GO:0001191//GO:0000981//GO:0042803//GO:0005515//GO:0019904//GO:0001102//GO:0003705//GO:0046983//GO:0046982	GO:0032922//GO:0009416//GO:0000122//GO:0006366//GO:0007623//GO:0045892//GO:0043433//GO:0006355//GO:0006351//GO:0043153
GOAT_ENSBTAP00000013018	75	52	39	676	761	781	12.9308	9.0836	7.65603	106.1	118.59	121.036	55.3333	739.333	9.89016	115.242	3.54253	6.44e-30	1.2e-27	RAB18	sp|Q0IIG8|RAB18_BOVIN Ras-related protein Rab-18 OS=Bos taurus GN=RAB18 PE=2 SV=1//1.92592e-15	GO:0005737//GO:0016020//GO:0005634//GO:0005622//GO:0005886	GO:0000166//GO:0003924//GO:0019003//GO:0005525	GO:0007420//GO:0006886//GO:0006810//GO:0006913//GO:0001654//GO:0007165//GO:0015031//GO:0006184//GO:0007264//GO:0007275
GOAT_ENSBTAP00000013079	39387	52367	48238	24150	20372	20781	5330.11	7180.09	7432.68	2975.12	2491.82	2527.83	46664	21767.7	6647.63	2664.92	-1.31875	2.69e-08	1.6e-07	RPS3A	sp|P61246|RS3A_FELCA 40S ribosomal protein S3a (Fragment) OS=Felis catus GN=RPS3A PE=2 SV=1//5.45169e-15	GO:0005737//GO:0005840//GO:0005730//GO:0005634//GO:0005622//GO:0030529//GO:0022627	GO:0003735//GO:0005515	GO:0006917//GO:0030154//GO:0006412
GOAT_ENSBTAP00000013093	22	43	30	190	231	191	1.96747	3.89621	3.05477	15.4683	18.6722	15.3538	31.6667	204	2.97282	16.4981	2.4724	2.28e-09	1.64e-08		sp|Q5R8C5|K1737_PONAB Uncharacterized protein KIAA1737 homolog OS=Pongo abelii PE=2 SV=1//0
GOAT_ENSBTAP00000013167	107	83	73	389	448	462	3.01192	2.36716	2.33968	9.96814	11.3982	11.6896	87.6667	433	2.57292	11.0186	2.09847	1.13e-08	7.18e-08	Sin3a	sp|Q60520|SIN3A_MOUSE Paired amphipathic helix protein Sin3a OS=Mus musculus GN=Sin3a PE=1 SV=3//0	GO:0005634//GO:0017053//GO:0000776//GO:0016580//GO:0005667	GO:0001103//GO:0003677//GO:0003714//GO:0005515//GO:0008134//GO:0001102//GO:0001106//GO:0003700//GO:0033558//GO:0003682	GO:0031937//GO:0006476//GO:0001701//GO:0000122//GO:0051329//GO:0043066//GO:0006260//GO:0071333//GO:0002218//GO:0034613//GO:0010971//GO:0045892//GO:0051595//GO:0006355//GO:0002230//GO:0045944//GO:2000678
GOAT_ENSBTAP00000013208	1689	1877	1612	951	1133	1027	201.901	227.332	219.405	103.489	122.416	110.351	1726	1037	216.213	112.085	-0.947856	5.17e-15	1.03e-13	NMRAL1	sp|Q0VCN1|NMRL1_BOVIN NmrA-like family domain-containing protein 1 OS=Bos taurus GN=NMRAL1 PE=2 SV=1//7.97733e-29	GO:0005737//GO:0005730//GO:0005634//GO:0048471	GO:0000166//GO:0016491	GO:0006813//GO:0008152
GOAT_ENSBTAP00000013242	83	52	52	319	321	252	5.72405	3.63344	4.08322	20.0272	20.0092	15.6216	62.3333	297.333	4.48024	18.5527	2.04998	2.87e-07	1.43e-06	RIOK3	sp|Q1RMT7|RIOK3_BOVIN Serine/threonine-protein kinase RIO3 OS=Bos taurus GN=RIOK3 PE=2 SV=1//2.14663e-27	--	GO:0004674//GO:0016301//GO:0000166//GO:0003824//GO:0016740//GO:0005515//GO:0016772//GO:0005524	GO:0006468//GO:0016310
GOAT_ENSBTAP00000013363	245	133	98	1365	1416	1478	53.5737	29.4663	24.3997	271.721	279.864	290.508	158.667	1419.67	35.8132	280.698	2.97045	4.81e-24	4.42e-22	NAP1L5	sp|Q1RMM5|NP1L5_BOVIN Nucleosome assembly protein 1-like 5 OS=Bos taurus GN=NAP1L5 PE=2 SV=1//6.64301e-60	GO:0005634	--	GO:0006334
GOAT_ENSBTAP00000013468	180	148	107	580	762	721	8.38322	6.98376	5.67408	24.5907	32.0769	30.1836	145	687.667	7.01369	28.9504	2.04534	4.31e-09	2.96e-08	ZER1	sp|Q7Z7L7|ZER1_HUMAN Protein zer-1 homolog OS=Homo sapiens GN=ZER1 PE=1 SV=1//7.77195e-13	GO:0000221//GO:0031462	GO:0046961//GO:0005515//GO:0004842//GO:0005488	GO:0015991//GO:0016567//GO:0051438
GOAT_ENSBTAP00000013630	2474	2690	1998	1357	1297	1297	474.446	522.672	436.271	236.904	224.816	223.576	2387.33	1317	477.796	228.432	-1.06463	2.34e-17	7.14e-16	FDX1L	sp|Q05B51|ADXL_BOVIN Adrenodoxin-like protein, mitochondrial OS=Bos taurus GN=FDX1L PE=2 SV=1//3.94649e-11	GO:0005739//GO:0005759	GO:0051536//GO:0051537//GO:0046872//GO:0009055	GO:0022900
GOAT_ENSBTAP00000013636	284	268	160	1361	1517	1507	10.1542	9.7085	6.5136	44.2987	49.0244	48.4328	237.333	1461.67	8.79211	47.252	2.42609	2.12e-15	4.56e-14	HYOU1	sp|Q9Y4L1|HYOU1_HUMAN Hypoxia up-regulated protein 1 OS=Homo sapiens GN=HYOU1 PE=1 SV=1//1.01608e-10	--	GO:0005524//GO:0000166	GO:0000902
GOAT_ENSBTAP00000013659	46	41	47	209	270	237	3.29268	2.97348	3.83056	13.6189	17.4684	15.2489	44.6667	238.667	3.36557	15.4454	2.19825	6.05e-08	3.36e-07	ALG11	sp|Q2TAA5|ALG11_HUMAN GDP-Man:Man(3)GlcNAc(2)-PP-Dol alpha-1,2-mannosyltransferase OS=Homo sapiens GN=ALG11 PE=1 SV=2//0	--	--	GO:0009058
GOAT_ENSBTAP00000013671	166	61	68	865	809	840	31.8343	11.8524	14.8481	151.011	140.228	144.799	98.3333	838	19.5116	145.346	2.89709	1.29e-20	6.61e-19	Rab12	sp|P35283|RAB12_MOUSE Ras-related protein Rab-12 OS=Mus musculus GN=Rab12 PE=1 SV=3//1.69175e-106	GO:0016020//GO:0055038//GO:0005622//GO:0005764	GO:0000166//GO:0003924//GO:0019003//GO:0005525	GO:0008333//GO:0044257//GO:0007165//GO:0015031//GO:0006184//GO:0007264
GOAT_ENSBTAP00000013694	103	87	76	390	389	353	5.65657	4.84088	4.75229	19.4978	19.3092	17.4256	88.6667	377.333	5.08325	18.7442	1.88262	1.64e-06	7.13e-06	MTMR7	sp|Q9Y216|MTMR7_HUMAN Myotubularin-related protein 7 OS=Homo sapiens GN=MTMR7 PE=1 SV=3//0
GOAT_ENSBTAP00000013696	451	226	274	1489	1253	1381	34.5589	17.5461	23.906	103.868	86.7827	95.1206	317	1374.33	25.337	95.2572	1.91058	1.34e-08	8.44e-08	TMEM184C	sp|Q17QL9|T184C_BOVIN Transmembrane protein 184C OS=Bos taurus GN=TMEM184C PE=2 SV=1//5.44873e-19	GO:0016021//GO:0016020	--	--
GOAT_ENSBTAP00000013701	182	105	136	639	671	556	7.70579	4.50427	6.55628	24.6293	25.6784	21.1601	141	622	6.25545	23.8226	1.92914	7.44e-08	4.07e-07	PRMT10	sp|Q6P2P2|ANM10_HUMAN Putative protein arginine N-methyltransferase 10 OS=Homo sapiens GN=PRMT10 PE=1 SV=1//0	GO:0005737	GO:0008276//GO:0005515	GO:0006479
GOAT_ENSBTAP00000013737	285	282	198	1449	1589	1388	5.20925	5.22238	4.12068	24.1103	26.2514	22.8043	255	1475.33	4.85077	24.3887	2.32993	4.06e-14	6.98e-13	MYH9	sp|P35579|MYH9_HUMAN Myosin-9 OS=Homo sapiens GN=MYH9 PE=1 SV=4//1.60311e-09	GO:0015629//GO:0031594//GO:0001931//GO:0016460//GO:0008180//GO:0005737//GO:0001725//GO:0001726//GO:0070062//GO:0005634//GO:0016459//GO:0043234//GO:0032154//GO:0031252//GO:0008305//GO:0005913//GO:0005938//GO:0005886//GO:0005826//GO:0030863//GO:0005829//GO:0005819//GO:0001772	GO:0016887//GO:0000166//GO:0003779//GO:0003774//GO:0005524//GO:0042803//GO:0051015//GO:0043531//GO:0000146//GO:0043495//GO:0005515//GO:0030898	GO:0016337//GO:0030224//GO:0030220//GO:0006928//GO:0007520//GO:0001768//GO:0001525//GO:0001701//GO:0031532//GO:0006200//GO:0032796//GO:0006509//GO:0038032//GO:0051295//GO:0000212//GO:0030048//GO:0000904//GO:0007155//GO:0007132//GO:0000910//GO:0043534//GO:0008360//GO:0015031
GOAT_ENSBTAP00000013790	104	109	93	632	815	629	2.79162	2.96441	2.84236	15.4435	19.7733	15.1765	102	692	2.86613	16.7977	2.55109	2.64e-15	5.59e-14	Erbb3	sp|Q62799|ERBB3_RAT Receptor tyrosine-protein kinase erbB-3 OS=Rattus norvegicus GN=Erbb3 PE=2 SV=3//2.87863e-08	GO:0005783//GO:0016021//GO:0016020//GO:0005792//GO:0043235//GO:0005856//GO:0005737//GO:0005901//GO:0005739//GO:0005634//GO:0016328//GO:0016324//GO:0009986//GO:0016323//GO:0005911//GO:0005899//GO:0005615//GO:0005887//GO:0005886	GO:0000166//GO:0004716//GO:0004714//GO:0004715//GO:0004712//GO:0004713//GO:0046872//GO:0005159//GO:0042169//GO:0030296//GO:0004702//GO:0048185//GO:0043548//GO:0019838//GO:0005524//GO:0005525//GO:0005131//GO:0016301//GO:0043559//GO:0016772//GO:0005007//GO:0005009//GO:0046982//GO:0043560//GO:0016740//GO:0017002//GO:0017134//GO:0031994//GO:0051425//GO:0008201//GO:0005024//GO:0005515//GO:0005518//GO:…	GO:0032148//GO:0032924//GO:0061302//GO:0032927//GO:0051048//GO:0032147//GO:0030509//GO:0007162//GO:0043524//GO:0007165//GO:0035265//GO:0030501//GO:0051897//GO:0023014//GO:0014037//GO:0009968//GO:0009966//GO:0001822//GO:0045669//GO:0042127//GO:0010923//GO:0051290//GO:0003007//GO:0001759//GO:0045995//GO:0007178//GO:0001501//GO:0045821//GO:0048554//GO:0060267//GO:0030335//GO:0019087//GO:0007169//GO:…
GOAT_ENSBTAP00000013805	17	18	13	166	173	155	0.955558	1.02511	0.832003	8.49418	8.78928	7.83137	16	164.667	0.937557	8.37161	3.15853	7.19e-13	9.81e-12	NUAK1	sp|O60285|NUAK1_HUMAN NUAK family SNF1-like kinase 1 OS=Homo sapiens GN=NUAK1 PE=1 SV=1//4.11685e-14	GO:0005737//GO:0016020//GO:0005634	GO:0042802//GO:0016772//GO:0000166//GO:0004674//GO:0004713//GO:0005515//GO:0004672//GO:0016773//GO:0002039//GO:0005524	GO:0006468//GO:0050772//GO:0035507//GO:0030155//GO:0007163//GO:0051645//GO:2000772//GO:0009103
GOAT_ENSBTAP00000013845	3246	3858	3349	1758	1891	1870	390.626	470.397	458.882	192.591	205.685	202.28	3484.33	1839.67	439.968	200.185	-1.13606	3.76e-13	5.42e-12	UBXN1	sp|Q04323|UBXN1_HUMAN UBX domain-containing protein 1 OS=Homo sapiens GN=UBXN1 PE=1 SV=2//2.77479e-29	GO:0005737//GO:0034098//GO:0000502	GO:0031625//GO:0051117//GO:0031593//GO:0043130//GO:0005515//GO:0071796	GO:0032435//GO:0031397
GOAT_ENSBTAP00000013862	40	13	31	346	407	394	3.21628	1.05907	2.83811	25.3265	29.5793	28.4766	28	382.333	2.37116	27.7941	3.55112	4.76e-24	4.38e-22	VPS4B	sp|Q0VD48|VPS4B_BOVIN Vacuolar protein sorting-associated protein 4B OS=Bos taurus GN=VPS4B PE=2 SV=1//8.25444e-11	GO:0005770//GO:0010008//GO:0005737//GO:0005634//GO:0016020//GO:0005774//GO:0031902//GO:0005829//GO:0005622//GO:0005764//GO:0005768//GO:0005769	GO:0008022//GO:0009378//GO:0016887//GO:0000166//GO:0005524//GO:0017111//GO:0005515	GO:0032510//GO:0030301//GO:0051301//GO:0033993//GO:0006200//GO:0007049//GO:0007032//GO:0006281//GO:0006813//GO:0006810//GO:0006310//GO:0016197//GO:0032367//GO:0015031
GOAT_ENSBTAP00000013868	8	8	1	129	119	172	0.498943	0.505522	0.0710124	7.32412	6.70822	9.64245	5.66667	140	0.358493	7.8916	4.4603	2.18e-17	6.68e-16	SLC40A1	sp|Q9NP59|S40A1_HUMAN Solute carrier family 40 member 1 OS=Homo sapiens GN=SLC40A1 PE=1 SV=1//0
GOAT_ENSBTAP00000013871	84	68	49	375	381	339	12.3458	10.126	8.1999	50.1736	50.6131	44.7854	67	365	10.2239	48.5241	2.24676	1.72e-09	1.26e-08	EGLN1	sp|Q9GZT9|EGLN1_HUMAN Egl nine homolog 1 OS=Homo sapiens GN=EGLN1 PE=1 SV=1//1.3594e-27	--	GO:0031418//GO:0016705//GO:0016706//GO:0005506//GO:0016491	GO:0060347//GO:0055008//GO:0060711//GO:0045765//GO:0060412//GO:0055114
GOAT_ENSBTAP00000013889	1297	1437	1132	613	628	651	211.42	237.33	210.1	90.9644	92.5263	95.3861	1288.67	630.667	219.617	92.9589	-1.24032	1.2e-19	5.35e-18	BLVRB	sp|P52556|BLVRB_BOVIN Flavin reductase (NADPH) OS=Bos taurus GN=BLVRB PE=1 SV=2//4.93041e-22	GO:0005737//GO:0005829//GO:0005886//GO:0005634	GO:0050662//GO:0016616//GO:0042602//GO:0000166//GO:0003824//GO:0003854//GO:0004074//GO:0016491	GO:0042167//GO:0044237//GO:0006694//GO:0055114
GOAT_ENSBTAP00000013892	93	44	58	391	390	344	9.01385	4.32085	6.40072	34.4992	34.1658	29.9698	65	375	6.57847	32.8782	2.32131	2.37e-10	2.03e-09	DDO	sp|P31228|OXDD_BOVIN D-aspartate oxidase OS=Bos taurus GN=DDO PE=1 SV=2//0	--	GO:0008445//GO:0016641//GO:0000166//GO:0003884//GO:0048037//GO:0005515//GO:0005102//GO:0016491	GO:0042445//GO:0007625//GO:0019478//GO:0055114//GO:0006531//GO:0006533//GO:0007320
GOAT_ENSBTAP00000013951-D2	693	584	424	9014	8490	8549	24.8521	21.2193	17.3128	294.274	275.192	275.577	567	8684.33	21.1281	281.681	3.73683	5.16e-46	7.82e-43	ATP1A2	sp|A2VDL6|AT1A2_BOVIN Sodium/potassium-transporting ATPase subunit alpha-2 OS=Bos taurus GN=ATP1A2 PE=2 SV=1//1.76183e-14	GO:0005737//GO:0016021//GO:0016020//GO:0042383//GO:0005792//GO:0005886	GO:0005391//GO:0016820//GO:0005524//GO:0000166//GO:0046872//GO:0016787//GO:0003824//GO:0015077//GO:0005515//GO:0015662	GO:0019229//GO:0006940//GO:0006942//GO:0001504//GO:0002087//GO:0008542//GO:0002026//GO:0015672//GO:0045988//GO:0006937//GO:0006813//GO:0006812//GO:0006811//GO:0006810//GO:0006814//GO:0008152//GO:0008344//GO:0040011//GO:0051481//GO:0045822//GO:0008217//GO:0006754
GOAT_ENSBTAP00000013988	18	15	10	163	149	193	1.58992	1.3424	1.00572	13.1068	11.8957	15.3235	14.3333	168.333	1.31268	13.442	3.35616	2.57e-14	4.55e-13	ACADL	sp|P28330|ACADL_HUMAN Long-chain specific acyl-CoA dehydrogenase, mitochondrial OS=Homo sapiens GN=ACADL PE=2 SV=2//3.86858e-47	GO:0005737//GO:0005739//GO:0030529//GO:0005840//GO:0005622	GO:0016491//GO:0050660//GO:0016627//GO:0003735//GO:0004466//GO:0016401//GO:0003995	GO:0090181//GO:0046322//GO:0044242//GO:0019254//GO:0042413//GO:0008152//GO:0001659//GO:0055114//GO:0033539//GO:0006412//GO:0045717
GOAT_ENSBTAP00000013990	33	15	8	272	268	296	10.2907	4.73927	2.8405	77.2156	75.5379	82.97	18.6667	278.667	5.95682	78.5745	3.72145	6.11e-22	4e-20	SH3BGRL	sp|Q5RFN7|SH3L1_PONAB SH3 domain-binding glutamic acid-rich-like protein OS=Pongo abelii GN=SH3BGRL PE=3 SV=1//2.15796e-11	GO:0005829	GO:0015035//GO:0017124//GO:0009055	GO:0045454
GOAT_ENSBTAP00000014035	1522	1731	1478	847	890	827	363.875	419.299	402.333	184.343	192.321	177.722	1577	854.667	395.169	184.795	-1.09654	6.79e-17	1.86e-15	KRTCAP2	sp|A6QQ59|KTAP2_BOVIN Keratinocyte-associated protein 2 OS=Bos taurus GN=KRTCAP2 PE=2 SV=1//3.35115e-61	GO:0016021//GO:0016020//GO:0008250	--	--
GOAT_ENSBTAP00000014038	55	75	47	479	531	548	12.6435	17.4685	12.302	100.241	110.331	113.236	59	519.333	14.138	107.936	2.93253	8.46e-19	3.25e-17	Ppp3r1	sp|P63100|CANB1_RAT Calcineurin subunit B type 1 OS=Rattus norvegicus GN=Ppp3r1 PE=1 SV=2//2.29915e-75	GO:0005829	GO:0005509	--
GOAT_ENSBTAP00000014105	220	177	140	875	851	890	13.1492	10.7187	9.5275	47.6092	45.9734	47.8152	179	872	11.1318	47.1326	2.08204	5.97e-10	4.78e-09	CUTL1	sp|Q5R8V1|CASP_PONAB Protein CASP OS=Pongo abelii GN=CUTL1 PE=2 SV=1//1.52782e-15
GOAT_ENSBTAP00000014109	118	78	65	383	346	402	16.6601	11.1578	10.4492	49.2265	44.154	51.0175	87	377	12.7557	48.1327	1.91588	1.09e-06	4.9e-06	PIK3IP1	sp|Q1RMT9|P3IP1_BOVIN Phosphoinositide-3-kinase-interacting protein 1 OS=Bos taurus GN=PIK3IP1 PE=2 SV=1//1.14671e-58	GO:0016021//GO:0016020	--	GO:0033673//GO:0043553//GO:0014067
GOAT_ENSBTAP00000014131	1093	1419	1067	743	651	633	87.4926	115.086	97.2498	54.1433	47.1011	45.5463	1193	675.667	99.9428	48.9302	-1.03038	6.34e-09	4.22e-08	NR1H3	sp|Q5E9B6|NR1H3_BOVIN Oxysterols receptor LXR-alpha OS=Bos taurus GN=NR1H3 PE=2 SV=1//0	GO:0005634//GO:0000790	GO:0008270//GO:0003677//GO:0070644//GO:0043565//GO:0004879//GO:0046872//GO:0032810//GO:0044212//GO:0003700//GO:0008434//GO:0046965//GO:0003707//GO:0005515//GO:0004872	GO:0090341//GO:0071222//GO:0090188//GO:0007595//GO:0060558//GO:2000189//GO:0001501//GO:0051006//GO:0010628//GO:0043401//GO:0048550//GO:0044255//GO:0010867//GO:0050728//GO:0030522//GO:0000902//GO:0000122//GO:0032376//GO:0055092//GO:0032270//GO:0045618//GO:0045723//GO:0008285//GO:0009887//GO:0060058//GO:0070328//GO:0006874//GO:0070561//GO:0006816//GO:0055088//GO:0034145//GO:0045892//GO:0045893//GO:…
GOAT_ENSBTAP00000014152	222	163	111	768	728	707	11.7945	8.77409	6.71462	37.1442	34.9587	33.7631	165.333	734.333	9.09439	35.2887	1.95616	3.48e-08	2.03e-07	Dvl1	sp|P51141|DVL1_MOUSE Segment polarity protein dishevelled homolog DVL-1 OS=Mus musculus GN=Dvl1 PE=1 SV=2//1.47091e-18	GO:0030424//GO:0015630//GO:0030136//GO:0045202//GO:0016328//GO:0016023//GO:0031410//GO:0019717//GO:0005622	GO:0019899//GO:0004871//GO:0042802//GO:0005109//GO:0005515//GO:0019901	GO:0048675//GO:0034504//GO:0050808//GO:0032436//GO:0007269//GO:0060029//GO:0090263//GO:0035372//GO:0030177//GO:0001505//GO:0060134//GO:0007411//GO:0035556//GO:0007275//GO:0032091//GO:0090103//GO:0045893//GO:0006366//GO:0006469//GO:0021915//GO:0035176//GO:0048668//GO:0031122//GO:0060071//GO:0060070//GO:0010976//GO:0007409//GO:0043113//GO:0007528//GO:0090179//GO:0071340//GO:0048813//GO:0001933//GO:…
GOAT_ENSBTAP00000014390	36	19	24	253	300	282	9.09166	4.86165	6.90121	58.1656	68.4796	64.0159	26.3333	278.333	6.95151	63.5537	3.19258	3.02e-17	9.05e-16	PGRMC2	sp|O15173|PGRC2_HUMAN Membrane-associated progesterone receptor component 2 OS=Homo sapiens GN=PGRMC2 PE=1 SV=1//1.10353e-90	--	GO:0020037	--
GOAT_ENSBTAP00000014394	34	37	28	215	232	196	3.07902	3.39488	2.88712	17.7246	18.9898	15.9547	33	214.333	3.12034	17.5564	2.49222	1.25e-09	9.43e-09	CNNM3	sp|Q8NE01|CNNM3_HUMAN Metal transporter CNNM3 OS=Homo sapiens GN=CNNM3 PE=1 SV=1//0	--	GO:0003899//GO:0005515//GO:0003677	GO:0006351
GOAT_ENSBTAP00000014474	3714	4656	3912	1611	2038	2378	761.084	966.703	912.774	300.532	377.48	438.027	4094	2009	880.187	372.013	-1.24246	7.45e-11	6.97e-10	RESP18	sp|A0JNL8|RES18_BOVIN Regulated endocrine-specific protein 18 OS=Bos taurus GN=RESP18 PE=2 SV=1//4.36353e-06	GO:0005794//GO:0005783//GO:0005576	--	GO:0001701
GOAT_ENSBTAP00000014486	2357	3317	2652	1265	1251	1329	635.531	906.175	814.187	310.508	304.883	322.107	2775.33	1281.67	785.298	312.499	-1.32939	3.59e-08	2.09e-07	PPP1R1A	sp|Q8WMS3|PPR1A_CANFA Protein phosphatase 1 regulatory subunit 1A OS=Canis familiaris GN=PPP1R1A PE=2 SV=1//8.9672e-55	--	GO:0004864//GO:0005515	GO:0007165
GOAT_ENSBTAP00000014692	1135	1331	1223	725	700	661	91.6731	108.921	112.472	53.3076	51.1026	47.9894	1229.67	695.333	104.356	50.7999	-1.03861	1.36e-11	1.48e-10	ADCK5	sp|Q3MIX3|ADCK5_HUMAN Uncharacterized aarF domain-containing protein kinase 5 OS=Homo sapiens GN=ADCK5 PE=2 SV=2//5.50159e-08	GO:0005739	GO:0016772	--
GOAT_ENSBTAP00000014698	89	36	43	347	313	325	1.85455	0.760046	1.02021	6.58237	5.89511	6.08737	56	328.333	1.2116	6.18828	2.35262	4.59e-10	3.75e-09	MON2	sp|Q7Z3U7|MON2_HUMAN Protein MON2 homolog OS=Homo sapiens GN=MON2 PE=1 SV=2//1.58757e-06	--	GO:0005488	--
GOAT_ENSBTAP00000014749	10	3	3	270	235	216	0.690974	0.210026	0.236024	16.9836	14.6767	13.4157	5.33333	240.333	0.379008	15.0253	5.30903	1.89e-32	4.55e-30	SLC38A2	sp|A2VE31|S38A2_BOVIN Sodium-coupled neutral amino acid transporter 2 OS=Bos taurus GN=SLC38A2 PE=2 SV=1//0	GO:0016020//GO:0016021//GO:0005886	GO:0015293//GO:0015171	GO:0006810//GO:0006811//GO:0006865//GO:0006814//GO:0003333
GOAT_ENSBTAP00000014796	2565	3090	2846	1370	1301	1410	647.781	790.657	818.368	314.968	296.973	320.079	2833.67	1360.33	752.269	310.673	-1.27585	7.55e-12	8.55e-11	FAM162A	sp|Q2NKR7|F162A_BOVIN Protein FAM162A OS=Bos taurus GN=FAM162A PE=2 SV=1//6.0289e-96	GO:0016020//GO:0016021//GO:0005739	GO:0005515	GO:0006927//GO:0006919//GO:0006915//GO:0090200//GO:0043065//GO:0051402//GO:0071456
GOAT_ENSBTAP00000014801	10238	10777	8749	5316	4746	5406	4423.5	4717.78	4304.1	2090.94	1853.44	2099.54	9921.33	5156	4481.8	2014.64	-1.15356	1.79e-19	7.68e-18	NDUFA4	sp|Q01321|NDUA4_BOVIN NADH dehydrogenase [ubiquinone] 1 alpha subcomplex subunit 4 OS=Bos taurus GN=NDUFA4 PE=1 SV=1//1.06675e-09	GO:0016020//GO:0005739//GO:0005751//GO:0005743//GO:0005747//GO:0070469	GO:0004129	GO:0022900
GOAT_ENSBTAP00000014803	160	44	89	932	1006	871	15.06	4.1961	9.53822	79.8592	85.5857	73.692	97.6667	936.333	9.5981	79.7123	3.05398	7.44e-24	6.52e-22	RNF13	sp|Q0VD51|RNF13_BOVIN E3 ubiquitin-protein ligase RNF13 OS=Bos taurus GN=RNF13 PE=2 SV=1//5.44385e-09	GO:0005794//GO:0005783//GO:0005637//GO:0005634//GO:0016020//GO:0031902//GO:0000139//GO:0005764//GO:0005765//GO:0005789//GO:0005768//GO:0016021	GO:0046872//GO:0016874//GO:0004842//GO:0008270//GO:0005515	GO:0051865
GOAT_ENSBTAP00000014888	4166	4745	3933	2639	2559	2689	679.087	783.667	729.968	391.607	377.03	393.999	4281.33	2629	730.907	387.545	-0.915324	5.15e-15	1.03e-13	EIF3K	sp|Q3T0V3|EIF3K_BOVIN Eukaryotic translation initiation factor 3 subunit K OS=Bos taurus GN=EIF3K PE=2 SV=1//1.641e-163	GO:0005737//GO:0005852//GO:0005634	GO:0005488//GO:0005515//GO:0043022//GO:0003743	GO:0006446//GO:0006412//GO:0006413
GOAT_ENSBTAP00000015037	21	17	14	164	147	132	0.384035	0.314985	0.29151	2.73024	2.42978	2.16982	17.3333	147.667	0.330176	2.44328	2.88751	2.26e-10	1.95e-09	CASP8AP2	sp|Q9UKL3|C8AP2_HUMAN CASP8-associated protein 2 OS=Homo sapiens GN=CASP8AP2 PE=1 SV=1//1.9042e-08	--	GO:0008656//GO:0005515//GO:0003677//GO:0016505//GO:0042802	GO:0008625//GO:0006919
GOAT_ENSBTAP00000015059	84	40	43	342	266	274	5.81539	2.80575	3.38954	21.5541	16.6449	17.0509	55.6667	294	4.00356	18.4166	2.20165	2.18e-08	1.32e-07	NT5E	sp|Q05927|5NTD_BOVIN 5&apos;-nucleotidase OS=Bos taurus GN=NT5E PE=1 SV=2//3.00426e-22	--	GO:0016787//GO:0046872//GO:0016788//GO:0000166	GO:0009166
GOAT_ENSBTAP00000015061	10	13	4	120	129	126	0.736377	0.969913	0.335377	8.04426	8.58596	8.34005	9	125	0.680555	8.32342	3.61239	2.87e-13	4.2e-12	TRIM68	sp|Q6AZZ1|TRI68_HUMAN E3 ubiquitin-protein ligase TRIM68 OS=Homo sapiens GN=TRIM68 PE=1 SV=1//0	GO:0005737//GO:0005794//GO:0005730//GO:0005634//GO:0005622	GO:0004842//GO:0050681//GO:0035035//GO:0008270//GO:0005515//GO:0046872	GO:0051865//GO:0060765
GOAT_ENSBTAP00000015066	35	32	22	216	171	186	18.4581	17.0985	13.2104	103.7	81.5108	88.1721	29.6667	191	16.2557	91.1276	2.48694	5.26e-09	3.55e-08	NREP	sp|Q5NVD3|NREP_PONAB Neuronal regeneration-related protein OS=Pongo abelii GN=NREP PE=3 SV=1//6.13963e-33	GO:0005737	GO:0005515	GO:0017015
GOAT_ENSBTAP00000015152	137	63	75	538	603	608	4.57878	2.13333	2.85406	16.3688	18.2157	18.2655	91.6667	583	3.18873	17.6166	2.46589	1.96e-13	2.98e-12	PDZD8	sp|Q8NEN9|PDZD8_HUMAN PDZ domain-containing protein 8 OS=Homo sapiens GN=PDZD8 PE=1 SV=1//3.97621e-40	GO:0005622	GO:0005515//GO:0046872	GO:0022604//GO:0007010//GO:0035556
GOAT_ENSBTAP00000015165	810	1168	984	448	384	393	115.269	168.407	159.44	58.0378	49.3922	50.2712	987.333	408.333	147.705	52.5671	-1.49049	5.68e-08	3.18e-07	CCDC107	sp|Q2NL23|CC107_BOVIN Coiled-coil domain-containing protein 107 OS=Bos taurus GN=CCDC107 PE=2 SV=1//1.14493e-114	GO:0016021//GO:0016020	--	--
GOAT_ENSBTAP00000015208	1442	2212	1720	707	708	751	372.031	578.214	505.261	166.05	165.1	174.161	1791.33	722	485.169	168.437	-1.52628	3.73e-07	1.81e-06	HINT2	sp|Q9BX68|HINT2_HUMAN Histidine triad nucleotide-binding protein 2, mitochondrial OS=Homo sapiens GN=HINT2 PE=1 SV=1//9.46688e-26	GO:0005739	GO:0016787//GO:0003824	GO:0006915//GO:0006694//GO:0008610
GOAT_ENSBTAP00000015260	90	118	101	328	428	394	5.7945	7.69742	7.40404	19.2244	24.9067	22.8017	103	383.333	6.96532	22.311	1.67949	4.07e-05	0.000137592	SLC43A2	sp|Q0VCM6|LAT4_BOVIN Large neutral amino acids transporter small subunit 4 OS=Bos taurus GN=SLC43A2 PE=2 SV=1//4.70864e-11	GO:0016020//GO:0016021//GO:0005886	GO:0015179	GO:0006865//GO:0015807//GO:0006810//GO:0055085
GOAT_ENSBTAP00000015319	1351	1527	1338	701	542	583	849.982	973.38	958.481	401.492	308.214	329.701	1405.33	608.667	927.281	346.469	-1.42028	5.84e-20	2.75e-18	SMIM11	sp|A6H770|SIM11_BOVIN Small integral membrane protein 11 OS=Bos taurus GN=SMIM11 PE=3 SV=1//6.63556e-17	GO:0016021//GO:0016020	--	--
GOAT_ENSBTAP00000015322	5932	6967	5380	3132	2896	3440	897.598	1068.11	926.907	431.427	396.076	467.883	6093	3156	964.205	431.795	-1.15899	4.83e-15	9.7e-14	RAMP1	sp|Q867C0|RAMP1_PIG Receptor activity-modifying protein 1 OS=Sus scrofa GN=RAMP1 PE=2 SV=1//7.16203e-61	GO:0043235//GO:0016021//GO:0044424//GO:0005886//GO:0009986	GO:0008565//GO:0015026//GO:0031716//GO:0004872//GO:0005515//GO:0004948	GO:0072659//GO:0031623//GO:0030819//GO:0006886//GO:0060050//GO:0006816//GO:0008277//GO:0015031//GO:0001525//GO:0007186
GOAT_ENSBTAP00000015330	2181	2828	2206	936	1013	1099	798.102	1048.51	919.14	311.805	335.051	361.492	2405	1016	921.917	336.116	-1.45568	1.09e-11	1.2e-10	CISD3	sp|P0C7P0|CISD3_HUMAN CDGSH iron-sulfur domain-containing protein 3, mitochondrial OS=Homo sapiens GN=CISD3 PE=1 SV=1//6.87246e-59
GOAT_ENSBTAP00000015354	1368	1423	1224	860	858	811	156.737	165.188	159.676	89.6991	88.8528	83.5225	1338.33	843	160.534	87.3581	-0.877861	9.02e-14	1.47e-12	FAHD2	sp|Q2KIB0|FAHD2_BOVIN Fumarylacetoacetate hydrolase domain-containing protein 2 OS=Bos taurus GN=FAHD2 PE=2 SV=1//0	GO:0005739	GO:0003824	GO:0008152
GOAT_ENSBTAP00000015358	38621	46210	38492	19462	16794	18241	5187.3	6288.44	5886.56	2379.63	2038.78	2202.24	41107.7	18165.7	5787.43	2206.88	-1.39091	8.89e-16	2.02e-14	RPL7A	sp|Q2TBQ5|RL7A_BOVIN 60S ribosomal protein L7a OS=Bos taurus GN=RPL7A PE=2 SV=3//2.63399e-162	GO:0005840//GO:0022625//GO:0005624//GO:0016020//GO:0030529//GO:0042788	GO:0005515	GO:0042254
GOAT_ENSBTAP00000015405	28	33	17	203	265	186	2.22644	2.65862	1.53913	14.6944	19.0457	13.2942	26	218	2.14139	15.6781	2.87213	7.18e-12	8.19e-11	IP6K1	sp|Q92551|IP6K1_HUMAN Inositol hexakisphosphate kinase 1 OS=Homo sapiens GN=IP6K1 PE=1 SV=3//0	GO:0005737//GO:0005730//GO:0005634	GO:0008440//GO:0016301	GO:0016310//GO:0046854
GOAT_ENSBTAP00000015410	39	37	29	210	254	266	0.966552	0.929076	0.818336	4.73789	5.68975	5.92571	35	243.333	0.904655	5.45111	2.59111	5.37e-11	5.2e-10	PDS5B	sp|Q9NTI5|PDS5B_HUMAN Sister chromatid cohesion protein PDS5 homolog B OS=Homo sapiens GN=PDS5B PE=1 SV=1//4.06259e-13	GO:0005634//GO:0000785	GO:0005488//GO:0005515	GO:0042127//GO:0008285//GO:0007064
GOAT_ENSBTAP00000015411	130	126	95	749	701	839	17.203	16.8935	14.3139	90.229	83.8449	99.7975	117	763	16.1368	91.2905	2.50011	7.12e-15	1.39e-13	SOX2	sp|P48431|SOX2_HUMAN Transcription factor SOX-2 OS=Homo sapiens GN=SOX2 PE=1 SV=1//6.84814e-161	GO:0005737//GO:0005667//GO:0005625//GO:0005829	GO:0003700//GO:0003677//GO:0044212//GO:0035198//GO:0005515//GO:0003682//GO:0043565	GO:0048568//GO:0050680//GO:0070848//GO:0060042//GO:0021983//GO:0048852//GO:0030178//GO:0001649//GO:0043586//GO:0048863//GO:0000122//GO:0001708//GO:0030910//GO:0009611//GO:0021987//GO:0045665//GO:0045747//GO:0045666//GO:0021984//GO:0021879//GO:0043281//GO:0030900//GO:0030858//GO:0010468//GO:0048646//GO:0090090//GO:0032526//GO:0050973//GO:0048663//GO:0019827//GO:0007605//GO:0060235//GO:0043410//GO:…
GOAT_ENSBTAP00000015420	306	185	169	1125	1273	1085	34.9479	21.4072	21.9765	116.965	131.41	111.385	220	1161	26.1105	119.92	2.19937	7.78e-12	8.79e-11	P33MONOX	sp|Q3T044|P33MX_BOVIN Putative monooxygenase p33MONOX OS=Bos taurus GN=P33MONOX PE=2 SV=1//1.01062e-172	GO:0005737//GO:0005575	GO:0003674//GO:0016491	GO:0008150//GO:0055114
GOAT_ENSBTAP00000015465	3117	3792	2918	1669	1555	1598	499.02	615.09	531.912	243.244	225.014	229.962	3275.67	1607.33	548.674	232.74	-1.23723	1.41e-13	2.21e-12	U2AF1	sp|A1A4K8|U2AF1_BOVIN Splicing factor U2AF 35 kDa subunit OS=Bos taurus GN=U2AF1 PE=2 SV=1//2.25983e-13	GO:0016607//GO:0005634//GO:0071013//GO:0005681	GO:0046872//GO:0005515//GO:0050733//GO:0008270//GO:0003676//GO:0003723//GO:0000166	GO:0008380//GO:0006397
GOAT_ENSBTAP00000015480	2985	3331	2822	2046	2349	2125	112.799	127.534	121.421	70.3839	80.2315	72.1805	3046	2173.33	120.585	74.2653	-0.699289	1.33e-11	1.45e-10	PRPF6	sp|Q2KJJ0|PRP6_BOVIN Pre-mRNA-processing factor 6 OS=Bos taurus GN=PRPF6 PE=2 SV=1//6.46953e-12	GO:0016607//GO:0046540//GO:0005634//GO:0071001//GO:0005622//GO:0005654//GO:0005681//GO:0005682//GO:0071013	GO:0050681//GO:0003713//GO:0005515//GO:0003723//GO:0043021	GO:0000398//GO:0045944//GO:0006403//GO:0008380//GO:0006396//GO:0006397
GOAT_ENSBTAP00000015599	31	19	23	381	335	332	2.64692	1.6437	2.23605	29.6148	25.8538	25.481	24.3333	349.333	2.17556	26.9832	3.6326	6.77e-24	6.03e-22	SGMS1	sp|A0AAS4|SMS1_PIG Phosphatidylcholine:ceramide cholinephosphotransferase 1 OS=Sus scrofa GN=SGMS1 PE=2 SV=2//8.01361e-17	GO:0016020//GO:0000138//GO:0030173	GO:0005515//GO:0047493//GO:0003824//GO:0033188	GO:0016049//GO:0043066//GO:0006686
GOAT_ENSBTAP00000015619	1541	2115	1617	787	608	750	378.511	526.351	452.23	175.977	134.983	165.59	1757.67	715	452.364	158.85	-1.50982	9.43e-10	7.27e-09	MRPL14	sp|Q1JQ99|RM14_BOVIN 39S ribosomal protein L14, mitochondrial OS=Bos taurus GN=MRPL14 PE=2 SV=1//3.51621e-09	GO:0005840//GO:0005739//GO:0030529	GO:0003735	GO:0006412
GOAT_ENSBTAP00000015620	17	13	8	155	156	136	1.33111	1.03133	0.713225	11.0484	11.0405	9.57195	12.6667	149	1.02522	10.5536	3.36373	2.53e-13	3.76e-12	FICD	sp|Q9BVA6|FICD_HUMAN Adenosine monophosphate-protein transferase FICD OS=Homo sapiens GN=FICD PE=1 SV=2//7.37766e-30	--	GO:0070733//GO:0005515	GO:0018117
GOAT_ENSBTAP00000015625	42	41	40	236	275	218	2.22808	2.20371	2.4161	11.3972	13.186	10.3953	41	243	2.28263	11.6595	2.35274	3.82e-09	2.65e-08	MPP5	sp|Q8N3R9|MPP5_HUMAN MAGUK p55 subfamily member 5 OS=Homo sapiens GN=MPP5 PE=1 SV=3//0	GO:0005737//GO:0035749//GO:0043219//GO:0005886//GO:0043220	GO:0019904//GO:0005515	GO:0032287//GO:0035750
GOAT_ENSBTAP00000015635	310	150	211	1355	1753	1234	10.0881	4.9457	7.81813	40.1413	51.5618	36.0961	223.667	1447.33	7.61731	42.5998	2.48349	4.27e-10	3.5e-09	TJP2	sp|Q95168|ZO2_CANFA Tight junction protein ZO-2 OS=Canis familiaris GN=TJP2 PE=1 SV=1//6.23307e-66	GO:0005737//GO:0005794//GO:0045177//GO:0016327//GO:0016324//GO:0016020//GO:0005923//GO:0014704//GO:0005913//GO:0005912//GO:0005911//GO:0005886//GO:0046581//GO:0016323//GO:0043296//GO:0005634//GO:0030054	GO:0005515//GO:0019904	GO:0001825
GOAT_ENSBTAP00000015667	85	66	40	388	472	515	4.71133	3.70645	2.5244	19.5777	23.6464	25.6584	63.6667	458.333	3.64739	22.9608	2.65424	1.51e-14	2.79e-13	ABCG4	sp|Q9H172|ABCG4_HUMAN ATP-binding cassette sub-family G member 4 OS=Homo sapiens GN=ABCG4 PE=2 SV=2//0	GO:0016021//GO:0016020	GO:0017111//GO:0000166//GO:0016887//GO:0046982//GO:0005524//GO:0042803	GO:0006200
GOAT_ENSBTAP00000015695	988	1071	880	659	662	708	571.471	627.648	579.553	346.998	346.094	368.102	979.667	676.333	592.891	353.732	-0.745111	1.4e-11	1.52e-10		sp|Q9D735|CS043_MOUSE Uncharacterized protein C19orf43 homolog OS=Mus musculus PE=2 SV=1//3.50282e-37
GOAT_ENSBTAP00000015696	34	31	17	237	262	222	4.58381	4.23446	2.60957	29.0871	31.9262	26.9029	27.3333	240.333	3.80928	29.3054	2.94358	9.45e-14	1.53e-12	PEX26	sp|Q7Z412|PEX26_HUMAN Peroxisome assembly protein 26 OS=Homo sapiens GN=PEX26 PE=1 SV=2//1.76098e-114
GOAT_ENSBTAP00000015716	13101	12237	11301	9527	9912	10925	1075.11	1017.45	1055.94	711.719	735.204	805.874	12213	10121.3	1049.5	750.932	-0.482943	5.85e-09	3.92e-08	EEF1G	sp|P29694|EF1G_RABIT Elongation factor 1-gamma OS=Oryctolagus cuniculus GN=EEF1G PE=2 SV=3//3.80221e-08	GO:0005853	GO:0005515//GO:0003746	GO:0009615//GO:0006414//GO:0006412
GOAT_ENSBTAP00000015758	21	8	17	197	209	184	0.799461	0.308573	0.736886	6.8273	7.19157	6.29642	15.3333	196.667	0.614973	6.77176	3.46094	1.33e-16	3.45e-15	MORC3	sp|Q14149|MORC3_HUMAN MORC family CW-type zinc finger protein 3 OS=Homo sapiens GN=MORC3 PE=1 SV=3//0	GO:0045111//GO:0005634//GO:0005654//GO:0016605//GO:0016235	GO:0008270//GO:0005524	GO:0050821//GO:0006468//GO:0018105//GO:0007569//GO:0048147//GO:0009791//GO:0051457
GOAT_ENSBTAP00000015768	55	79	34	409	347	432	3.54109	5.15336	2.49245	23.9719	20.1931	25.0009	56	396	3.72896	23.0553	2.62825	1.34e-13	2.12e-12	SLC24A3	sp|Q9HC58|NCKX3_HUMAN Sodium/potassium/calcium exchanger 3 OS=Homo sapiens GN=SLC24A3 PE=2 SV=4//0	GO:0016021//GO:0016020	GO:0008273	GO:0055085
GOAT_ENSBTAP00000015797	37	14	12	219	233	231	2.64846	1.01533	0.978016	14.2705	15.0746	14.8628	21	227.667	1.54727	14.736	3.25155	7.08e-16	1.64e-14	ACVR1	sp|Q04771|ACVR1_HUMAN Activin receptor type-1 OS=Homo sapiens GN=ACVR1 PE=1 SV=1//0	GO:0016020//GO:0045177//GO:0048179//GO:0005887	GO:0004872//GO:0050431//GO:0019838//GO:0000166//GO:0004675//GO:0004674//GO:0004713//GO:0004672//GO:0016361//GO:0005524//GO:0042803//GO:0046332//GO:0016772//GO:0005025//GO:0005024//GO:0005515//GO:0004702//GO:0048185	GO:0018107//GO:0001569//GO:0032924//GO:0032926//GO:0007498//GO:2000017//GO:0000082//GO:0009790//GO:0051145//GO:0030501//GO:0010862//GO:0023014//GO:0001702//GO:0001701//GO:0001707//GO:0009968//GO:0007368//GO:0007369//GO:0060923//GO:0043066//GO:0045669//GO:0006468//GO:0003143//GO:0060037//GO:0007281//GO:0003289//GO:0045893//GO:0001755//GO:0002526//GO:0030278//GO:0007179//GO:0007178//GO:0007507//GO:…
GOAT_ENSBTAP00000015810	3299	4261	3464	1729	1518	1930	946.458	1238.57	1131.54	451.563	393.631	497.708	3674.67	1725.67	1105.52	447.634	-1.30434	1.19e-10	1.07e-09	BLOC1S1	sp|Q5R7L8|BL1S1_PONAB Biogenesis of lysosome-related organelles complex 1 subunit 1 OS=Pongo abelii GN=BLOC1S1 PE=2 SV=2//1.26735e-08	GO:0005737//GO:0031083//GO:0005829//GO:0005739//GO:0005759//GO:0005758	GO:0005515	GO:0018394//GO:0008089//GO:0009060//GO:0048490
GOAT_ENSBTAP00000015829	5060	5364	5164	3556	3173	3589	752.944	808.705	874.926	481.702	426.757	480.047	5196	3439.33	812.192	462.835	-0.811321	2.45e-13	3.65e-12	CD63	sp|Q9XSK2|CD63_BOVIN CD63 antigen OS=Bos taurus GN=CD63 PE=2 SV=4//7.85579e-145	GO:0016021//GO:0016020//GO:0005764//GO:0005765//GO:0001772//GO:0005886//GO:0005768//GO:0031902	GO:0005515	GO:0008285//GO:0030886//GO:0050688//GO:0002920//GO:0042832//GO:0002639
GOAT_ENSBTAP00000015866	1599	1932	2112	981	972	1082	347.531	425.443	522.652	194.097	190.946	211.383	1881	1011.67	431.875	198.809	-1.11923	1.8e-06	7.73e-06	Sec11c	sp|Q9D8V7|SC11C_MOUSE Signal peptidase complex catalytic subunit SEC11C OS=Mus musculus GN=Sec11c PE=2 SV=3//5.84454e-115	GO:0016021//GO:0016020	GO:0016787//GO:0008233//GO:0008236	GO:0006465//GO:0006508
GOAT_ENSBTAP00000015875-D2	23552	26787	26316	12161	11266	11361	5345.64	6160.06	6800.88	2512.73	2311.22	2317.86	25551.7	11596	6102.19	2380.6	-1.358	2.72e-13	4e-12	RPS19	sp|Q5R8M9|RS19_PONAB 40S ribosomal protein S19 OS=Pongo abelii GN=RPS19 PE=2 SV=3//1.81645e-16	GO:0005840//GO:0030529//GO:0005622	GO:0003735	GO:0006412
GOAT_ENSBTAP00000015883	2364	2557	2190	1234	1197	1184	1695.53	1858.14	1788.45	805.71	775.983	763.324	2370.33	1205	1780.71	781.672	-1.18782	2.34e-19	9.88e-18	HSPB1	sp|Q3T149|HSPB1_BOVIN Heat shock protein beta-1 OS=Bos taurus GN=HSPB1 PE=2 SV=1//1.78254e-25	GO:0030018//GO:0005737//GO:0005634//GO:0009986//GO:0005886//GO:0005625//GO:0005626//GO:0005622//GO:0043292	GO:0005080//GO:0008426//GO:0019901//GO:0005515	GO:0038033//GO:0001525//GO:0009615//GO:0045766//GO:0043066//GO:0035767//GO:0043122//GO:0006469//GO:0043536//GO:0043534//GO:0007243//GO:2001028//GO:0042535//GO:0032731//GO:0035924
GOAT_ENSBTAP00000015905	9	2	4	130	123	132	0.978042	0.220209	0.494935	12.8607	12.0815	12.894	5	128.333	0.564395	12.612	4.48195	5.3e-18	1.8e-16	PLSCR4	sp|Q9NRQ2|PLS4_HUMAN Phospholipid scramblase 4 OS=Homo sapiens GN=PLSCR4 PE=1 SV=2//2.18494e-160	GO:0005886	GO:0042609//GO:0005515//GO:0019899	GO:0071222
GOAT_ENSBTAP00000015944	28	7	10	181	185	162	7.43795	1.88401	3.0246	43.7702	44.4187	38.6819	15	176	4.11552	42.2903	3.36118	1.27e-14	2.38e-13	CYB5A	sp|P00171|CYB5_BOVIN Cytochrome b5 OS=Bos taurus GN=CYB5A PE=1 SV=3//4.7509e-90	GO:0005783//GO:0005792//GO:0016021//GO:0016020//GO:0005739//GO:0005789	GO:0020037//GO:0019899//GO:0046872	GO:0022900
GOAT_ENSBTAP00000015986	35	26	21	257	208	244	1.10781	0.8338	0.756818	7.4052	5.95061	6.94204	27.3333	236.333	0.899478	6.76595	2.91113	1.95e-13	2.96e-12	JAK2	sp|O19064|JAK2_PIG Tyrosine-protein kinase JAK2 OS=Sus scrofa GN=JAK2 PE=2 SV=1//3.95537e-10	GO:0045121//GO:0005901//GO:0005737//GO:0005634//GO:0016020//GO:0005856	GO:0042169//GO:0005143//GO:0042393//GO:0000166//GO:0016740//GO:0004715//GO:0004672//GO:0005524//GO:0004713//GO:0005515//GO:0020037//GO:0019901//GO:0035401//GO:0016772//GO:0016301//GO:0005102	GO:0019221//GO:0016310//GO:0030154//GO:0018108//GO:0046677//GO:0007167//GO:0050727//GO:0007259//GO:0035722//GO:0007260//GO:0008285//GO:0006468//GO:0033209//GO:0010811//GO:0034612//GO:0006915//GO:0043392//GO:0007262//GO:0035409//GO:0007243//GO:0060396//GO:0070671//GO:0030099//GO:0061180
GOAT_ENSBTAP00000016009	1148	1604	1187	611	664	767	357.992	506.786	421.459	173.451	187.154	214.993	1313	680.667	428.746	191.866	-1.16002	1.76e-07	9.05e-07	CCDC167	sp|A1A4P9|CC167_BOVIN Coiled-coil domain-containing protein 167 OS=Bos taurus GN=CCDC167 PE=4 SV=1//6.12147e-06	GO:0016021//GO:0016020	--	--
GOAT_ENSBTAP00000016033	33	51	27	324	235	219	3.20713	5.02183	2.98772	28.665	20.6428	19.1313	37	259.333	3.73889	22.8131	2.60918	5.9e-09	3.95e-08	GGTA1	sp|P14769|GGTA1_BOVIN N-acetyllactosaminide alpha-1,3-galactosyltransferase OS=Bos taurus GN=GGTA1 PE=1 SV=1//3.56604e-44	GO:0005794//GO:0016021//GO:0016020//GO:0032580	GO:0047276//GO:0016740//GO:0016757//GO:0016758//GO:0046872	GO:0005975//GO:0006486
GOAT_ENSBTAP00000016122	150	67	68	980	956	1016	11.4209	5.16859	5.89509	67.9265	65.7908	69.5344	95	984	7.49485	67.7506	3.17626	6.01e-26	6.93e-24	NONO	sp|Q5RFL9|NONO_PONAB Non-POU domain-containing octamer-binding protein OS=Pongo abelii GN=NONO PE=2 SV=3//3.66731e-14	GO:0016363//GO:0042382	GO:0042802//GO:0003676//GO:0000166	--
GOAT_ENSBTAP00000016153	3334	3956	3289	1728	1584	1658	1013.24	1218.13	1138.11	478.074	435.112	452.928	3526.33	1656.67	1123.16	455.372	-1.30245	9.93e-16	2.23e-14	snr-4	sp|Q18786|SMD2_CAEEL Probable small nuclear ribonucleoprotein Sm D2 OS=Caenorhabditis elegans GN=snr-4 PE=1 SV=1//1.00354e-14	GO:0005634//GO:0005689//GO:0030529//GO:0071013//GO:0005681	GO:0005515	GO:0008380//GO:0006397
GOAT_ENSBTAP00000016296	1213	1535	1249	797	877	1052	52.6635	67.5222	61.7426	31.5001	34.415	41.0547	1332.33	908.667	60.6428	35.6566	-0.766166	1.18e-07	6.25e-07	TFIP11	sp|Q29RR5|TFP11_BOVIN Tuftelin-interacting protein 11 OS=Bos taurus GN=TFIP11 PE=2 SV=2//1.2459e-08	GO:0016607//GO:0005634//GO:0005578//GO:0071013//GO:0005681	GO:0005515//GO:0003676//GO:0003677	GO:0008380//GO:0006355//GO:0006397
GOAT_ENSBTAP00000016391	61	83	68	361	403	361	3.09414	4.26557	3.92728	16.6695	18.4762	16.4594	70.6667	375	3.76233	17.2017	2.19285	2.68e-09	1.9e-08	ARNT2	sp|Q9HBZ2|ARNT2_HUMAN Aryl hydrocarbon receptor nuclear translocator 2 OS=Homo sapiens GN=ARNT2 PE=1 SV=2//0	GO:0005737//GO:0005634//GO:0005667	GO:0004871//GO:0005515//GO:0003700	GO:0006355//GO:0007165
GOAT_ENSBTAP00000016407	229	169	146	789	892	918	5.24412	3.92115	3.80683	16.4482	18.463	18.8963	181.333	866.333	4.32403	17.9358	2.0524	1.28e-09	9.6e-09	ARHGEF11	sp|O15085|ARHGB_HUMAN Rho guanine nucleotide exchange factor 11 OS=Homo sapiens GN=ARHGEF11 PE=1 SV=1//0	GO:0005737//GO:0030425//GO:0005622	GO:0005089//GO:0005543//GO:0005085//GO:0001664//GO:0005515	GO:0038032//GO:0051496//GO:2000297//GO:0050790//GO:0045893//GO:0035023//GO:0007266//GO:0035556//GO:0061299
GOAT_ENSBTAP00000016421	27	33	35	284	345	313	0.856111	1.06016	1.26359	8.19765	9.88746	8.9209	31.6667	314	1.05995	9.002	3.08624	2.37e-17	7.19e-16	CPD	sp|O75976|CBPD_HUMAN Carboxypeptidase D OS=Homo sapiens GN=CPD PE=1 SV=2//1.76579e-152	--	GO:0004181//GO:0004180//GO:0008270//GO:0004185	GO:0006508
GOAT_ENSBTAP00000016446	15	9	10	145	148	147	1.40818	0.856047	1.0689	12.3919	12.5582	12.4045	11.3333	146.667	1.11104	12.4515	3.48634	4.65e-14	7.93e-13	Ccdc85a	sp|Q5SP85|CC85A_MOUSE Coiled-coil domain-containing protein 85A OS=Mus musculus GN=Ccdc85a PE=2 SV=1//0
GOAT_ENSBTAP00000016466	796	334	299	2690	2251	2762	30.1434	12.8149	12.8921	92.7334	77.0466	94.0158	476.333	2567.67	18.6168	87.9319	2.23978	2.92e-10	2.46e-09	PAM	sp|P10731|AMD_BOVIN Peptidyl-glycine alpha-amidating monooxygenase OS=Bos taurus GN=PAM PE=1 SV=2//0	GO:0016020	GO:0004497//GO:0004504//GO:0016715//GO:0003824//GO:0005515//GO:0005507	GO:0006518//GO:0055114
GOAT_ENSBTAP00000016514	47	29	18	723	757	722	5.36781	3.35573	2.3407	75.1696	78.1438	74.1198	31.3333	734	3.68808	75.8111	4.36147	1.61e-42	1.36e-39	Ppp1cb	sp|P62142|PP1B_RAT Serine/threonine-protein phosphatase PP1-beta catalytic subunit OS=Rattus norvegicus GN=Ppp1cb PE=1 SV=3//1.79505e-20	GO:0005737//GO:0070688//GO:0072357	GO:0016787//GO:0050115//GO:0004722//GO:0004721//GO:0019901//GO:0005515	GO:0006470//GO:0030155
GOAT_ENSBTAP00000016545	56	48	38	242	248	290	2.7548	2.39239	2.12843	10.8373	11.0269	12.8232	47.3333	260	2.4252	11.5625	2.25327	1.69e-08	1.04e-07	MASP1	sp|P48740|MASP1_HUMAN Mannan-binding lectin serine protease 1 OS=Homo sapiens GN=MASP1 PE=1 SV=3//0	GO:0005615//GO:0005576	GO:0016787//GO:0004252//GO:0003824//GO:0005509//GO:0005515//GO:0008233	GO:0006956//GO:0001867//GO:0006508//GO:0045916
GOAT_ENSBTAP00000016652	45	57	57	538	659	549	4.06491	5.21678	5.86255	44.2411	53.805	44.5768	53	582	5.04808	47.541	3.23536	7.21e-24	6.34e-22	CASC4	sp|Q5R5X4|CASC4_PONAB Protein CASC4 OS=Pongo abelii GN=CASC4 PE=2 SV=1//0
GOAT_ENSBTAP00000016739	9	6	5	214	311	236	0.886687	0.598919	0.560881	19.1931	27.6941	20.8996	6.66667	253.667	0.682162	22.5956	5.04978	2.95e-23	2.35e-21	GDAP1	sp|A6QQZ0|GDAP1_BOVIN Ganglioside-induced differentiation-associated protein 1 OS=Bos taurus GN=GDAP1 PE=2 SV=1//0	GO:0031307	GO:0005515	GO:0000266//GO:0006626//GO:0032526
GOAT_ENSBTAP00000016756	303	149	232	1163	1108	917	40.3942	20.1258	35.2158	141.144	133.511	109.886	228	1062.67	31.9119	128.18	2.00601	1.59e-09	1.17e-08	TRA2A	sp|Q13595|TRA2A_HUMAN Transformer-2 protein homolog alpha OS=Homo sapiens GN=TRA2A PE=1 SV=1//6.47321e-17	GO:0005634	GO:0003676//GO:0000166	GO:0000398
GOAT_ENSBTAP00000016778	2080	2787	1920	1219	1258	1191	202.696	275.174	213.037	108.141	110.805	104.326	2262.33	1222.67	230.302	107.757	-1.09574	7.09e-08	3.9e-07	UROD	sp|Q8HY31|DCUP_SHEEP Uroporphyrinogen decarboxylase OS=Ovis aries GN=UROD PE=1 SV=1//1.54144e-21	GO:0005737//GO:0005634//GO:0015630//GO:0005829	GO:0016829//GO:0016831//GO:0004853	GO:0042168//GO:0006783//GO:0006779
GOAT_ENSBTAP00000016780	842	858	877	473	325	405	311.293	321.391	369.173	159.193	108.602	134.589	859	401	333.952	134.128	-1.31603	7.28e-18	2.41e-16	NAA38	sp|Q5RCP3|NAA38_PONAB N-alpha-acetyltransferase 38, NatC auxiliary subunit OS=Pongo abelii GN=NAA38 PE=3 SV=3//1.07438e-62	GO:0005634//GO:0030529	GO:0003723//GO:0005515	GO:0008380//GO:0006397
GOAT_ENSBTAP00000016785	1113	1375	1075	602	555	578	332.616	416.332	365.788	163.776	149.913	155.265	1187.67	578.333	371.579	156.318	-1.24918	8.47e-13	1.14e-11	Chchd1	sp|Q9CQA6|CHCH1_MOUSE Coiled-coil-helix-coiled-coil-helix domain-containing protein 1 OS=Mus musculus GN=Chchd1 PE=2 SV=1//2.60664e-66	GO:0005737//GO:0005634//GO:0005739//GO:0005730	GO:0005515	--
GOAT_ENSBTAP00000016841	126	73	77	426	393	419	8.29093	4.86681	5.76895	25.518	23.3735	24.7825	92	412.667	6.3089	24.558	1.96073	2.74e-07	1.37e-06	GLT25D1	sp|A5PK45|GT251_BOVIN Procollagen galactosyltransferase 1 OS=Bos taurus GN=GLT25D1 PE=2 SV=1//3.92944e-10	GO:0005783//GO:0005788	GO:0050211//GO:0016740//GO:0016757	GO:0009103
GOAT_ENSBTAP00000016957	2778	2750	2726	1578	1510	1539	1006.3	1009.29	1124.33	520.362	494.39	501.107	2751.33	1542.33	1046.64	505.286	-1.05059	5.51e-17	1.54e-15	NDUFB3	sp|Q02365|NDUB3_BOVIN NADH dehydrogenase [ubiquinone] 1 beta subcomplex subunit 3 OS=Bos taurus GN=NDUFB3 PE=1 SV=2//1.34003e-53	GO:0016021//GO:0016020//GO:0005739//GO:0005743//GO:0005747//GO:0070469	GO:0008137	GO:0022900
GOAT_ENSBTAP00000016993	11940	16396	12309	6622	6734	6562	3892.61	5415.81	4569.12	1965.31	1984.31	1922.96	13548.3	6639.33	4625.85	1957.52	-1.24069	1.83e-08	1.12e-07	COX6A1	sp|P13182|CX6A1_BOVIN Cytochrome c oxidase subunit 6A1, mitochondrial OS=Bos taurus GN=COX6A1 PE=1 SV=3//6.52639e-61	GO:0005751//GO:0005743//GO:0016020//GO:0005739	GO:0004129	--
GOAT_ENSBTAP00000017069	109	61	56	621	680	669	6.7279	3.8148	3.93563	34.8939	37.9368	37.1173	75.3333	656.667	4.82611	36.6493	2.92485	6.9e-20	3.2e-18	Fam129b	sp|B4F7E8|NIBL1_RAT Niban-like protein 1 OS=Rattus norvegicus GN=Fam129b PE=2 SV=1//1.23109e-09	GO:0005829//GO:0005912	GO:0005543//GO:0005515	GO:0043066
GOAT_ENSBTAP00000017076	59	44	35	338	423	316	1.4974	1.13143	1.01141	7.80923	9.70345	7.20895	46	359	1.21342	8.24054	2.76367	1.42e-14	2.63e-13	PTPRU	sp|Q92729|PTPRU_HUMAN Receptor-type tyrosine-protein phosphatase U OS=Homo sapiens GN=PTPRU PE=1 SV=2//1.83411e-06	GO:0016020//GO:0005911	GO:0008013//GO:0005515//GO:0016787//GO:0004721//GO:0016791//GO:0004725	GO:0008285//GO:0016337//GO:0030336//GO:0016311//GO:0006470//GO:0034394//GO:0060070//GO:0034109//GO:0035335
GOAT_ENSBTAP00000017090	199	120	107	729	751	665	12.7437	7.78595	7.80186	42.4985	43.469	38.279	142	715	9.44382	41.4155	2.13273	4.44e-10	3.63e-09	NT5C2	sp|O46411|5NTC_BOVIN Cytosolic purine 5&apos;-nucleotidase OS=Bos taurus GN=NT5C2 PE=2 SV=1//1.06059e-32	GO:0005737	GO:0016787//GO:0005515//GO:0008253//GO:0000166//GO:0003824//GO:0046872	GO:0009117//GO:0008152
GOAT_ENSBTAP00000017106	178	75	91	703	780	680	16.4097	7.00535	9.55199	58.9983	64.994	56.349	114.667	721	10.989	60.1138	2.45164	6.2e-14	1.03e-12	SNX6	sp|Q5R613|SNX6_PONAB Sorting nexin-6 OS=Pongo abelii GN=SNX6 PE=2 SV=1//8.35154e-25	GO:0005737//GO:0043231//GO:0005622//GO:0031901	GO:0035091//GO:0005515//GO:0042803	GO:0006886//GO:0045892//GO:0042147//GO:0007154//GO:0030512
GOAT_ENSBTAP00000017150	39	21	27	330	297	302	9.45	5.15556	7.44911	72.7924	65.0463	65.7767	29	309.667	7.35156	67.8718	3.20669	2.99e-18	1.06e-16	ARL8B	sp|Q4R4S4|ARL8B_MACFA ADP-ribosylation factor-like protein 8B OS=Macaca fascicularis GN=ARL8B PE=2 SV=1//6.50522e-20	GO:0005737//GO:0051233//GO:0016020//GO:0030496//GO:0005622//GO:0005634	GO:0048487//GO:0000166//GO:0003924//GO:0043014//GO:0019003//GO:0004871//GO:0019001//GO:0005525	GO:0006886//GO:0007165//GO:0006184//GO:0015031//GO:0007059//GO:0007264//GO:0007186
GOAT_ENSBTAP00000017155	15	12	9	184	210	214	1.13967	0.923756	0.778579	12.7265	14.4213	14.615	12	202.667	0.947334	13.9209	3.87724	6.53e-20	3.04e-18	HSPA13	sp|Q2TBX4|HSP13_BOVIN Heat shock 70 kDa protein 13 OS=Bos taurus GN=HSPA13 PE=2 SV=1//0	GO:0005792//GO:0005783	GO:0000166//GO:0005524	GO:0000902
GOAT_ENSBTAP00000017171	14	36	31	173	182	189	0.467469	1.21791	1.17858	5.25867	5.49282	5.67263	27	181.333	0.954655	5.4747	2.51973	2.71e-09	1.92e-08	Phf2	sp|Q9WTU0|PHF2_MOUSE Lysine-specific demethylase PHF2 OS=Mus musculus GN=Phf2 PE=1 SV=2//3.64346e-26	GO:0005730	GO:0035064//GO:0005515//GO:0003713//GO:0032454//GO:0008270//GO:0005506	GO:0006482//GO:0033169//GO:0061188
GOAT_ENSBTAP00000017178	1769	1952	1734	1338	1255	1275	215.779	241.241	240.826	148.574	138.364	139.794	1818.33	1289.33	232.615	142.244	-0.709576	1.71e-11	1.82e-10	Ppp4c	sp|Q5BJ92|PP4C_RAT Serine/threonine-protein phosphatase 4 catalytic subunit OS=Rattus norvegicus GN=Ppp4c PE=1 SV=1//1.7883e-19	GO:0005737//GO:0005634//GO:0005856//GO:0005815//GO:0030289//GO:0005886	GO:0005515//GO:0016787//GO:0004722//GO:0004721//GO:0046872	GO:0010569//GO:0006468
GOAT_ENSBTAP00000017187-D2	2083	2588	2228	1261	1111	1079	350.702	441.472	427.108	193.272	169.068	163.293	2299.67	1150.33	406.427	175.211	-1.2139	2.53e-11	2.61e-10	THYN1	sp|Q9P016|THYN1_HUMAN Thymocyte nuclear protein 1 OS=Homo sapiens GN=THYN1 PE=1 SV=1//3.07898e-24	GO:0005634//GO:0005730	--	--
GOAT_ENSBTAP00000017194	210	130	97	680	770	584	20.5763	12.9057	10.8216	60.6543	68.1927	51.435	145.667	678	14.7679	60.094	2.02476	9.8e-09	6.31e-08	TMEM25	sp|Q86YD3|TMM25_HUMAN Transmembrane protein 25 OS=Homo sapiens GN=TMEM25 PE=1 SV=1//0	GO:0016020	GO:0005515	--
GOAT_ENSBTAP00000017292	12	6	8	150	144	165	3.26014	1.65156	2.47468	37.0981	35.3604	40.2937	8.66667	153	2.46213	37.584	3.93214	3.44e-17	1.01e-15	FAM210B	sp|Q96KR6|F210B_HUMAN Protein FAM210B OS=Homo sapiens GN=FAM210B PE=1 SV=2//5.61763e-14
GOAT_ENSBTAP00000017306	396	299	165	1276	1383	1499	17.2974	13.2326	8.20622	50.7389	54.6018	58.8553	286.667	1386	12.9121	54.732	2.08366	1.79e-10	1.57e-09	AMPD2	sp|Q01433|AMPD2_HUMAN AMP deaminase 2 OS=Homo sapiens GN=AMPD2 PE=1 SV=2//1.87959e-09	--	GO:0019239//GO:0003876	GO:0006188//GO:0009168
GOAT_ENSBTAP00000017362	1368	1546	1200	833	830	889	245.293	280.865	244.993	135.972	134.517	143.284	1371.33	850.667	257.05	137.924	-0.898174	3.98e-14	6.86e-13	ITGB1BP1	sp|Q3ZBM4|ITBP1_BOVIN Integrin beta-1-binding protein 1 OS=Bos taurus GN=ITGB1BP1 PE=2 SV=1//1.56467e-101	GO:0005829//GO:0005737//GO:0001726//GO:0005634//GO:0048471//GO:0030027//GO:0071944	GO:0005178//GO:0008565//GO:0032403//GO:0005092//GO:0005515	GO:0032148//GO:0035148//GO:0007160//GO:0043088//GO:0051897//GO:0051895//GO:0032091//GO:0050880//GO:0044344//GO:0045747//GO:0002043//GO:0008284//GO:0008285//GO:0006469//GO:0090315//GO:0010595//GO:0007229//GO:0090051//GO:0045944//GO:0015031//GO:0070373//GO:0035924
GOAT_ENSBTAP00000017382	23	15	5	188	192	178	1.2006	0.793328	0.297177	8.93377	9.05884	8.35199	14.3333	186	0.763703	8.78154	3.52339	3.72e-16	9.05e-15	PPP1R15B	sp|Q5SWA1|PR15B_HUMAN Protein phosphatase 1 regulatory subunit 15B OS=Homo sapiens GN=PPP1R15B PE=1 SV=1//5.87198e-08	GO:0000164	GO:0004722	GO:0006983//GO:0042542//GO:0006950//GO:0006979
GOAT_ENSBTAP00000017383	63	64	39	472	441	418	4.09289	4.21269	2.88488	27.9149	25.8957	24.4098	55.3333	443.667	3.73015	26.0735	2.80528	3.4e-16	8.34e-15	FUBP3	sp|Q96I24|FUBP3_HUMAN Far upstream element-binding protein 3 OS=Homo sapiens GN=FUBP3 PE=1 SV=2//0	GO:0005737//GO:0005634	GO:0003723	GO:0010628//GO:0045893//GO:0010468//GO:0006351
GOAT_ENSBTAP00000017473	50	29	32	599	870	617	2.51484	1.47784	1.83258	27.4265	39.551	27.8948	37	695.333	1.94175	31.6241	4.0256	3.32e-17	9.81e-16	DDHD2	sp|O94830|DDHD2_HUMAN Phospholipase DDHD2 OS=Homo sapiens GN=DDHD2 PE=1 SV=2//0	GO:0005737//GO:0005813	GO:0046872//GO:0005515	--
GOAT_ENSBTAP00000017481	122	103	64	433	492	563	17.3615	14.851	10.3701	56.0946	63.2838	72.017	96.3333	496	14.1942	63.7985	2.16822	1.38e-09	1.03e-08	Nipsnap1	sp|O55125|NIPS1_MOUSE Protein NipSnap homolog 1 OS=Mus musculus GN=Nipsnap1 PE=1 SV=1//2.05976e-13
GOAT_ENSBTAP00000017503	34	53	33	407	398	391	2.1242	3.35492	2.34749	23.1482	22.475	21.958	40	398.667	2.60887	22.527	3.11016	3.36e-19	1.38e-17	Msn	sp|P26041|MOES_MOUSE Moesin OS=Mus musculus GN=Msn PE=1 SV=3//8.99299e-08	GO:0019898//GO:0030175//GO:0005902//GO:0005925//GO:0005737//GO:0045177//GO:0070062//GO:0005730//GO:0005634//GO:0016020//GO:0005856//GO:0016324//GO:0016323//GO:0005886//GO:0042995//GO:0031528//GO:0001931	GO:0050839//GO:0019901//GO:0008092//GO:0005515//GO:0005102	GO:2000401//GO:0022614//GO:0007159//GO:0050900
GOAT_ENSBTAP00000017535	51	45	61	294	316	307	1.70929	1.52808	2.32781	8.9701	9.57263	9.24872	52.3333	305.667	1.85506	9.26382	2.32014	7.3e-10	5.74e-09	KIAA0355	sp|O15063|K0355_HUMAN Uncharacterized protein KIAA0355 OS=Homo sapiens GN=KIAA0355 PE=1 SV=2//0
GOAT_ENSBTAP00000017563	296	332	225	1463	1724	1383	5.53154	6.2861	4.78751	24.8888	29.1199	23.2313	284.333	1523.33	5.53505	25.7467	2.21772	1.26e-12	1.65e-11	AGRN	sp|O00468|AGRIN_HUMAN Agrin OS=Homo sapiens GN=AGRN PE=1 SV=4//4.88938e-06	GO:0005605//GO:0005604//GO:0005615//GO:0009986//GO:0031012//GO:0045202	GO:0005509//GO:0030548//GO:0043236//GO:0005515	GO:0008582//GO:0007213//GO:0032314//GO:0007009//GO:0045213//GO:0045944//GO:0043525//GO:0007268//GO:2000541//GO:0043113//GO:0001934
GOAT_ENSBTAP00000017626	2954	3932	3228	1683	1787	1811	165.008	222.534	205.306	85.5821	90.2231	90.9307	3371.33	1760.33	197.616	88.9119	-1.15225	9.81e-09	6.31e-08	Hdgfrp2	sp|Q925G1|HDGR2_RAT Hepatoma-derived growth factor-related protein 2 OS=Rattus norvegicus GN=Hdgfrp2 PE=1 SV=2//6.08664e-09	GO:0005634	GO:0003677	GO:0006351
GOAT_ENSBTAP00000017654	702	839	702	389	337	387	185.109	224.151	210.766	93.378	80.3191	91.7274	747.667	371	206.675	88.4748	-1.22403	3.53e-14	6.13e-13	Cenpv	sp|Q9CXS4|CENPV_MOUSE Centromere protein V OS=Mus musculus GN=Cenpv PE=2 SV=2//1.06787e-96	GO:0005737//GO:0015630//GO:0005634//GO:0051233//GO:0000776	GO:0016846	GO:0033044//GO:0031508//GO:0034508//GO:0008152//GO:0001667//GO:0032467
GOAT_ENSBTAP00000017658	125	62	64	574	643	639	5.69593	2.86243	3.32053	23.8106	26.4828	26.173	83.6667	618.667	3.95963	25.4888	2.68643	2.2e-16	5.53e-15	PNPLA8	sp|Q9NP80|PLPL8_HUMAN Calcium-independent phospholipase A2-gamma OS=Homo sapiens GN=PNPLA8 PE=1 SV=1//1.969e-11	GO:0016020//GO:0005778//GO:0005624//GO:0005777//GO:0005622	GO:0016787//GO:0005488//GO:0047499	GO:0006631//GO:0006629//GO:0043651//GO:0050482//GO:0001516//GO:0019369//GO:0008152//GO:0046338//GO:0008219//GO:0034638
GOAT_ENSBTAP00000017670	75	37	37	332	269	339	4.16995	2.0843	2.34231	16.804	13.5183	16.9421	49.6667	313.333	2.86552	15.7548	2.45892	7.38e-11	6.91e-10	Smo	sp|P56726|SMO_MOUSE Smoothened homolog OS=Mus musculus GN=Smo PE=1 SV=2//0	GO:0016021//GO:0005794//GO:0060170//GO:0005929//GO:0016020//GO:0072372//GO:0005886//GO:0005901//GO:0043231	GO:0004930//GO:0005119//GO:0004871//GO:0008144//GO:0005113//GO:0004888//GO:0005515//GO:0004872	GO:0034504//GO:0048565//GO:0007166//GO:0048589//GO:0048468//GO:0072001//GO:0050821//GO:0042307//GO:0010629//GO:0001503//GO:0072285//GO:0007165//GO:0035264//GO:0007494//GO:0060248//GO:0007275//GO:0001649//GO:0007417//GO:0007389//GO:0001701//GO:0021904//GO:0000122//GO:0003323//GO:0001708//GO:0001947//GO:0043066//GO:0051799//GO:2000036//GO:0021696//GO:0060684//GO:0007186//GO:0010468//GO:0021953//GO:…
GOAT_ENSBTAP00000017816	3638	3527	3742	2469	2522	2838	543.601	533.965	636.641	335.849	340.614	381.178	3635.67	2609.67	571.402	352.547	-0.696692	1.63e-11	1.74e-10	PSMB6	sp|Q3MHN0|PSB6_BOVIN Proteasome subunit beta type-6 OS=Bos taurus GN=PSMB6 PE=1 SV=1//2.33358e-21	GO:0005737//GO:0005839//GO:0005634//GO:0000502	GO:0004175//GO:0016787//GO:0004298//GO:0008233	GO:0051603//GO:0006508
GOAT_ENSBTAP00000017880	2860	2993	2628	2037	2003	2209	212.788	225.62	222.628	137.968	134.698	147.732	2827	2083	220.346	140.133	-0.652974	6.08e-11	5.82e-10	RBM42	sp|Q0P5L0|RBM42_BOVIN RNA-binding protein 42 OS=Bos taurus GN=RBM42 PE=2 SV=1//1.46287e-36	--	GO:0017091//GO:0003723//GO:0003676//GO:0000166	--
GOAT_ENSBTAP00000017903	17	6	7	247	253	235	0.579512	0.207231	0.271697	7.66505	7.7953	7.20077	10	245	0.352813	7.55371	4.42021	1.58e-26	1.93e-24	ZBTB11	sp|O95625|ZBT11_HUMAN Zinc finger and BTB domain-containing protein 11 OS=Homo sapiens GN=ZBTB11 PE=1 SV=2//4.47863e-07	GO:0005634//GO:0005622	GO:0003676//GO:0008270//GO:0005515//GO:0046872	--
GOAT_ENSBTAP00000017926	1148	1278	1181	566	535	605	134.981	152.247	158.107	60.5829	56.8567	63.9415	1202.33	568.667	148.445	60.4604	-1.29587	9.51e-18	3.09e-16	DNAJC17	sp|Q2KI83|DJC17_BOVIN DnaJ homolog subfamily C member 17 OS=Bos taurus GN=DNAJC17 PE=2 SV=1//2.88982e-19	--	GO:0031072//GO:0051082//GO:0000166//GO:0003723//GO:0003676	GO:0006457
GOAT_ENSBTAP00000017991	1128	1008	998	669	622	776	142.939	129.417	143.995	77.1744	71.2413	88.3898	1044.67	689	138.784	78.9352	-0.814098	1.43e-12	1.85e-11	DDAH2	sp|Q3SX44|DDAH2_BOVIN N(G),N(G)-dimethylarginine dimethylaminohydrolase 2 OS=Bos taurus GN=DDAH2 PE=2 SV=1//3.75956e-140	GO:0005737	GO:0016787//GO:0005515//GO:0016813//GO:0016403	GO:0000052//GO:0045429
GOAT_ENSBTAP00000017997	25203	12971	14188	154736	120785	142274	2416.63	1260.14	1549	13506.8	10468.1	12262.6	17454	139265	1741.92	12079.2	2.79377	5.26e-25	5.52e-23	GFAP	sp|Q28115|GFAP_BOVIN Glial fibrillary acidic protein OS=Bos taurus GN=GFAP PE=2 SV=2//3.22526e-61	GO:0005737//GO:0005882//GO:0016020//GO:0005624//GO:0044464//GO:0044297//GO:0042995	GO:0005515//GO:0005198	GO:0045109//GO:0060291//GO:0060020//GO:0045103//GO:0051580//GO:0030198//GO:0010977//GO:0014002//GO:0010625//GO:0031102
GOAT_ENSBTAP00000018013	44	23	22	240	281	227	3.02281	1.60094	1.7209	15.0098	17.4487	14.0179	29.6667	249.333	2.11488	15.4921	2.87289	2.08e-13	3.14e-12	MAVS	sp|Q7Z434|MAVS_HUMAN Mitochondrial antiviral-signaling protein OS=Homo sapiens GN=MAVS PE=1 SV=2//7.20075e-09	GO:0005778//GO:0005777//GO:0005739//GO:0005741//GO:0031966	GO:0050700//GO:0004871//GO:0019901//GO:0005515	GO:0060340//GO:0007165//GO:0045071//GO:0071660//GO:0032727//GO:0033160//GO:0032760//GO:0032728//GO:0045087//GO:0032481//GO:0042993//GO:0051091//GO:0051607//GO:0071360//GO:0071651//GO:0002218//GO:0002230//GO:0045944//GO:0043123//GO:0032757//GO:0001934//GO:0042742
GOAT_ENSBTAP00000018069	122	51	48	414	503	446	3.39682	1.43871	1.5217	10.4935	12.6584	11.1621	73.6667	454.333	2.11908	11.438	2.43233	5.58e-12	6.47e-11	Kdm3a	sp|Q6PCM1|KDM3A_MOUSE Lysine-specific demethylase 3A OS=Mus musculus GN=Kdm3a PE=1 SV=1//1.21137e-17	GO:0005737//GO:0005634	GO:0005515//GO:0003700//GO:0050681//GO:0001047//GO:0000976//GO:0005506	GO:0009755//GO:0030521//GO:0046293//GO:0007283//GO:0007290//GO:0045944//GO:0045893//GO:0033169//GO:0051573
GOAT_ENSBTAP00000018091	12622	18286	13837	5679	5285	5541	3121.69	4582.15	3896.51	1278.61	1181.42	1231.82	14915	5501.67	3866.78	1230.62	-1.65175	6.26e-09	4.17e-08	FKBP2	sp|Q32PA9|FKBP2_BOVIN Peptidyl-prolyl cis-trans isomerase FKBP2 OS=Bos taurus GN=FKBP2 PE=2 SV=1//1.25191e-97	GO:0016020//GO:0005789//GO:0005783	GO:0016853//GO:0005528//GO:0003755	GO:0000413//GO:0006457//GO:0018208
GOAT_ENSBTAP00000018099	94	66	46	319	366	316	11.4659	8.15671	6.3887	35.4223	40.3517	34.6471	68.6667	333.667	8.67045	36.807	2.0858	9.1e-08	4.9e-07	TMEM38A	sp|A4FV75|TM38A_BOVIN Trimeric intracellular cation channel type A OS=Bos taurus GN=TMEM38A PE=2 SV=1//2.21859e-13	GO:0016020//GO:0016021//GO:0005634//GO:0031965//GO:0033017//GO:0016529	GO:0005267//GO:0005216//GO:0005261	GO:0071805//GO:0006813//GO:0006810//GO:0015672//GO:0006811
GOAT_ENSBTAP00000018136	49	49	34	246	277	233	4.88116	4.94552	3.85637	22.3083	24.9405	20.8632	44	252	4.56101	22.704	2.31552	7.23e-09	4.78e-08	RFFL	sp|Q8WZ73|RFFL_HUMAN E3 ubiquitin-protein ligase rififylin OS=Homo sapiens GN=RFFL PE=1 SV=1//0	GO:0016023	GO:0046872//GO:0008270//GO:0005515	GO:0006886
GOAT_ENSBTAP00000018186	4770	5777	4963	3323	3010	3010	934.752	1147.02	1107.38	592.807	533.143	530.203	5170	3114.33	1063.05	552.051	-0.945334	1.11e-10	1.01e-09	FTL	sp|O46415|FRIL_BOVIN Ferritin light chain OS=Bos taurus GN=FTL PE=2 SV=3//3.74264e-112	--	GO:0046914//GO:0008199//GO:0046872//GO:0016491	GO:0006879//GO:0006826//GO:0055114
GOAT_ENSBTAP00000018227	72	27	37	286	229	298	3.29341	1.25131	1.92703	11.9092	9.46777	12.2526	45.3333	271	2.15725	11.2099	2.3775	1.37e-09	1.02e-08	FAM5B	sp|Q9C0B6|FAM5B_HUMAN Protein FAM5B OS=Homo sapiens GN=FAM5B PE=2 SV=2//0
GOAT_ENSBTAP00000018408	20	7	11	270	269	280	0.771216	0.273485	0.482961	9.47795	9.37556	9.70515	12.6667	273	0.509221	9.51955	4.22453	1.39e-26	1.71e-24	SCYL2	sp|Q6P3W7|SCYL2_HUMAN SCY1-like protein 2 OS=Homo sapiens GN=SCYL2 PE=1 SV=1//0	--	GO:0016772//GO:0005515//GO:0004672//GO:0005102//GO:0005524//GO:0005488	GO:0090090//GO:0006468//GO:2000286//GO:2000370//GO:0008333//GO:0002092
GOAT_ENSBTAP00000018411	18	12	6	141	171	150	2.00468	1.35408	0.760848	14.2954	17.2135	15.0163	12	154	1.3732	15.5084	3.49743	2.22e-14	3.98e-13	DUSP1	sp|P28562|DUS1_HUMAN Dual specificity protein phosphatase 1 OS=Homo sapiens GN=DUSP1 PE=1 SV=3//1.34721e-07	--	GO:0016787//GO:0016791//GO:0008138//GO:0004725//GO:0004721//GO:0017017//GO:0005515	GO:0016311//GO:0006470//GO:0035335
GOAT_ENSBTAP00000018457	15	28	15	160	204	164	0.722045	1.36559	0.822124	7.01128	8.87569	7.09602	19.3333	176	0.969919	7.661	2.9816	3.85e-12	4.6e-11	LARP4B	sp|Q92615|LAR4B_HUMAN La-related protein 4B OS=Homo sapiens GN=LARP4B PE=1 SV=3//0	GO:0010494//GO:0042788//GO:0005829	GO:0000166//GO:0003676	GO:0045727
GOAT_ENSBTAP00000018478	1440	1491	1263	812	737	844	607.537	637.348	606.718	311.868	281.046	320.074	1398	797.667	617.201	304.329	-1.02011	4.89e-16	1.17e-14	Anapc11	sp|Q9CPX9|APC11_MOUSE Anaphase-promoting complex subunit 11 OS=Mus musculus GN=Anapc11 PE=2 SV=1//2.96687e-18	GO:0005737//GO:0005634//GO:0005680	GO:0008270//GO:0005515//GO:0046872//GO:0004842	GO:0070979//GO:0016567//GO:0007049//GO:0007067//GO:0051301
GOAT_ENSBTAP00000018491	14469	15721	14974	8933	7824	8234	3369.36	3709.18	3970.26	1893.7	1646.78	1723.52	15054.7	8330.33	3682.93	1754.67	-1.06966	9.4e-16	2.12e-14	Rps11	sp|P62282|RS11_RAT 40S ribosomal protein S11 OS=Rattus norvegicus GN=Rps11 PE=1 SV=3//5.04999e-109	GO:0005840//GO:0030529//GO:0005622//GO:0022627	GO:0003735//GO:0003723//GO:0019843	GO:0006412
GOAT_ENSBTAP00000018505	5359	5144	4654	3943	3732	4014	667.299	648.973	659.836	446.959	420.027	449.275	5052.33	3896.33	658.703	438.754	-0.586216	3.23e-10	2.7e-09	ATP5C1	sp|P05631|ATPG_BOVIN ATP synthase subunit gamma, mitochondrial OS=Bos taurus GN=ATP5C1 PE=1 SV=3//0	GO:0045261//GO:0016020//GO:0005743//GO:0005753//GO:0005739	GO:0005515//GO:0046933//GO:0046961//GO:0016887	GO:0015986//GO:0015992//GO:0006811//GO:0006810//GO:0006200//GO:0006754
GOAT_ENSBTAP00000018544	55	39	42	237	297	256	3.17104	2.2782	2.75716	12.4392	15.4773	13.2671	45.3333	263.333	2.73547	13.7279	2.32725	3.39e-09	2.36e-08	CHFR	sp|Q96EP1|CHFR_HUMAN E3 ubiquitin-protein ligase CHFR OS=Homo sapiens GN=CHFR PE=1 SV=2//0	GO:0016605//GO:0005634	GO:0000166//GO:0008270//GO:0005515//GO:0046872//GO:0004842	GO:0000278//GO:0019941//GO:0016567//GO:0006511//GO:0000209//GO:0007093
GOAT_ENSBTAP00000018635	251	189	164	1043	1117	1070	6.19494	4.72623	4.60872	23.4343	24.9181	23.7381	201.333	1076.67	5.17663	24.0302	2.21476	5.63e-12	6.52e-11	PPIP5K1	sp|A7Z050|VIP1_BOVIN Inositol hexakisphosphate and diphosphoinositol-pentakisphosphate kinase 1 OS=Bos taurus GN=PPIP5K1 PE=2 SV=1//3.35439e-10	GO:0005737//GO:0005829//GO:0005634	GO:0033857//GO:0000832//GO:0000827//GO:0016301//GO:0000166//GO:0016740//GO:0003993//GO:0052723//GO:0052724//GO:0005524	GO:0016310//GO:0006020
GOAT_ENSBTAP00000018659	39	61	30	574	728	726	2.84847	4.51405	2.49484	38.1649	48.0594	47.6631	43.3333	676	3.28579	44.6291	3.76367	7.39e-32	1.66e-29	G3BP2	sp|Q5R9L3|G3BP2_PONAB Ras GTPase-activating protein-binding protein 2 OS=Pongo abelii GN=G3BP2 PE=2 SV=1//1.50492e-09
GOAT_ENSBTAP00000018734	20	6	8	223	223	185	1.26719	0.385171	0.577133	12.8624	12.7708	10.5362	11.3333	210.333	0.743165	12.0564	4.01998	2.52e-21	1.43e-19	ARHGEF3	sp|Q9NR81|ARHG3_HUMAN Rho guanine nucleotide exchange factor 3 OS=Homo sapiens GN=ARHGEF3 PE=2 SV=1//0	GO:0005622	GO:0005089//GO:0005543//GO:0005085//GO:0005515	GO:0035023//GO:0035556
GOAT_ENSBTAP00000018749	679	740	733	394	406	394	108.705	120.033	133.616	57.4225	58.7498	56.699	717.333	398	120.785	57.6237	-1.0677	3.63e-13	5.24e-12	TSR3	sp|Q9UJK0|TSR3_HUMAN Ribosome biogenesis protein TSR3 homolog OS=Homo sapiens GN=TSR3 PE=1 SV=1//5.85316e-28	--	--	GO:0006364//GO:0042254
GOAT_ENSBTAP00000018760	53	37	26	266	255	260	1.83108	1.29516	1.02277	8.366	7.96289	8.07426	38.6667	260.333	1.383	8.13439	2.55623	6.99e-11	6.58e-10	IPO8	sp|O15397|IPO8_HUMAN Importin-8 OS=Homo sapiens GN=IPO8 PE=1 SV=2//0	GO:0005622	GO:0008565//GO:0005488//GO:0005515	GO:0006886
GOAT_ENSBTAP00000018766	2710	2880	2735	1566	1530	1455	359.944	387.567	413.615	189.348	183.677	173.711	2775	1517	387.042	182.245	-1.08661	1.36e-17	4.28e-16	GNPTG	sp|Q58CS8|GNPTG_BOVIN N-acetylglucosamine-1-phosphotransferase subunit gamma OS=Bos taurus GN=GNPTG PE=1 SV=4//0	GO:0005794//GO:0005576	--	--
GOAT_ENSBTAP00000018777	19	25	14	264	264	319	3.11128	4.14776	2.61027	39.3544	39.074	46.9541	19.3333	282.333	3.28977	41.7942	3.66724	7.16e-22	4.63e-20	RAB5B	sp|Q5ZHW4|RAB5B_CHICK Ras-related protein Rab-5B OS=Gallus gallus GN=RAB5B PE=2 SV=1//2.86733e-25	GO:0055038//GO:0055037//GO:0030425//GO:0030139//GO:0042588//GO:0031513//GO:0005737//GO:0042995//GO:0016020//GO:0005776//GO:0005739//GO:0043025//GO:0005794//GO:0042470//GO:0016324//GO:0016323//GO:0045335//GO:0005886//GO:0048471//GO:0005932//GO:0005829//GO:0005622//GO:0005768//GO:0005634	GO:0030742//GO:0000166//GO:0005525//GO:0005515//GO:0003924//GO:0019003	GO:0045921//GO:0048210//GO:0030336//GO:0031954//GO:0006904//GO:0018125//GO:0017157//GO:0007165//GO:0002415//GO:0006886//GO:0045056//GO:0061097//GO:0032402//GO:0032401//GO:0042384//GO:0006810//GO:0006913//GO:0032486//GO:0006184//GO:0007264//GO:0030100//GO:0007032//GO:0051489//GO:0050773//GO:0051963//GO:0032456//GO:0015031//GO:0046847
GOAT_ENSBTAP00000018778	11531	14639	11378	5751	5435	5939	5513.59	7091.99	6194.51	2503.32	2348.91	2552.58	12516	5708.33	6266.7	2468.27	-1.34421	4.95e-12	5.78e-11	COX6C	sp|P04038|COX6C_BOVIN Cytochrome c oxidase subunit 6C OS=Bos taurus GN=COX6C PE=1 SV=2//1.77423e-46	GO:0005743//GO:0016021//GO:0016020//GO:0005739	GO:0004129	--
GOAT_ENSBTAP00000018787	888	1023	816	522	531	488	413.572	482.729	432.715	221.316	223.528	204.294	909	513.667	443.005	216.38	-1.03376	1.16e-15	2.6e-14	FAAP20	sp|A5PKK9|FAP20_BOVIN Fanconi anemia-associated protein of 20 kDa OS=Bos taurus GN=FAAP20 PE=2 SV=2//1.20376e-41	GO:0044427//GO:0043240	GO:0043130//GO:0005515//GO:0031593//GO:0070530	GO:0019985//GO:0006974
GOAT_ENSBTAP00000018852	123	145	83	1347	1320	1431	4.03565	4.82021	3.1007	40.2329	39.1455	42.2033	117	1366	3.98552	40.5272	3.34605	6.54e-31	1.37e-28	SLC12A5	sp|Q9H2X9|S12A5_HUMAN Solute carrier family 12 member 5 OS=Homo sapiens GN=SLC12A5 PE=2 SV=3//0	GO:0043198//GO:0016020//GO:0016021//GO:0005886//GO:0043025	GO:0005515//GO:0015377//GO:0015379	GO:0007612//GO:0006811//GO:0006810//GO:0042493//GO:0006821//GO:0035264//GO:0007268//GO:0055085//GO:0040040
GOAT_ENSBTAP00000018888	13157	16236	15640	6403	5482	5548	4671.59	5840.85	6322.92	2069.65	1759.32	1770.69	15011	5811	5611.79	1866.55	-1.58808	2.49e-11	2.57e-10	RPL35A	sp|Q5R8K6|RL35A_PONAB 60S ribosomal protein L35a OS=Pongo abelii GN=RPL35A PE=3 SV=1//5.11694e-27	GO:0005840//GO:0030529//GO:0005622	GO:0000049//GO:0003735//GO:0003723	GO:0006412
GOAT_ENSBTAP00000018910	11122	14086	12874	5675	4698	5095	3296.3	4229.81	4344.41	1531.14	1258.51	1357.33	12694	5156	3956.84	1382.33	-1.51725	3.51e-11	3.51e-10	RPL34	sp|P49207|RL34_HUMAN 60S ribosomal protein L34 OS=Homo sapiens GN=RPL34 PE=1 SV=3//1.08986e-15	GO:0022625//GO:0005840//GO:0005622	GO:0003735	GO:0006412
GOAT_ENSBTAP00000018956	524	613	448	2345	2636	2286	18.7915	22.273	18.2928	76.5555	85.4424	73.6891	528.333	2422.33	19.7858	78.5623	1.98938	3.91e-10	3.23e-09	SREBF2	sp|Q12772|SRBP2_HUMAN Sterol regulatory element-binding protein 2 OS=Homo sapiens GN=SREBF2 PE=1 SV=2//0	GO:0005737//GO:0032937//GO:0016020//GO:0005783//GO:0005634	GO:0008022//GO:0003700//GO:0070888//GO:0044212//GO:0005515//GO:0000978//GO:0046983//GO:0003677	GO:0006355//GO:0072368//GO:0000122//GO:0090370//GO:2000188//GO:0010886//GO:0045944//GO:0055098
GOAT_ENSBTAP00000019031	50	21	21	371	417	412	0.955289	0.406512	0.456833	6.45273	7.20112	7.07555	30.6667	400	0.606211	6.9098	3.51075	1.11e-23	9.43e-22	HEATR5B	sp|Q9P2D3|HTR5B_HUMAN HEAT repeat-containing protein 5B OS=Homo sapiens GN=HEATR5B PE=1 SV=2//1.97118e-07	--	GO:0005488//GO:0005515	--
GOAT_ENSBTAP00000019041	70	25	38	256	350	358	4.53944	1.6426	2.80583	15.1129	20.515	20.8682	44.3333	321.333	2.99596	18.832	2.6521	5.41e-10	4.37e-09	Slc33a1	sp|Q6AYY8|ACATN_RAT Acetyl-coenzyme A transporter 1 OS=Rattus norvegicus GN=Slc33a1 PE=2 SV=1//0	GO:0016020//GO:0016021	GO:0008521	GO:0015876
GOAT_ENSBTAP00000019109	4861	5647	4077	3596	3428	3599	445.839	524.758	425.761	300.246	284.179	296.71	4861.67	3541	465.453	293.712	-0.664235	4.84e-10	3.93e-09	Smarcd3	sp|Q6P9Z1|SMRD3_MOUSE SWI/SNF-related matrix-associated actin-dependent regulator of chromatin subfamily D member 3 OS=Mus musculus GN=Smarcd3 PE=1 SV=2//8.2554e-22
GOAT_ENSBTAP00000019182	35	57	47	443	394	341	1.68251	2.77622	2.57254	19.3865	17.1193	14.7347	46.3333	392.667	2.34376	17.0802	2.86543	1.85e-16	4.72e-15	MTMR10	sp|Q9NXD2|MTMRA_HUMAN Myotubularin-related protein 10 OS=Homo sapiens GN=MTMR10 PE=1 SV=3//1.70884e-07	--	GO:0016791	GO:0016311
GOAT_ENSBTAP00000019184	13922	17638	16502	7372	6197	6675	3725.85	4782.59	5028.45	1796.03	1499.01	1605.73	16020.7	6748	4512.3	1633.59	-1.46581	2.49e-10	2.12e-09	RPL22	sp|P67985|RL22_PIG 60S ribosomal protein L22 OS=Sus scrofa GN=RPL22 PE=2 SV=2//7.8568e-51	GO:0005840//GO:0005622	GO:0003735	GO:0006412
GOAT_ENSBTAP00000019219	79	81	64	297	308	296	2.00642	2.08434	1.85075	6.86682	7.0704	6.75747	74.6667	300.333	1.9805	6.89823	1.80036	1.67e-05	6.02e-05	YEATS2	sp|Q9ULM3|YETS2_HUMAN YEATS domain-containing protein 2 OS=Homo sapiens GN=YEATS2 PE=1 SV=2//2.2891e-10	GO:0072686//GO:0005634//GO:0005671	GO:0017025//GO:0005515//GO:0003677	GO:0043966//GO:0000122//GO:0006355//GO:0045892
GOAT_ENSBTAP00000019296	92	66	81	347	342	328	2.86892	2.08528	2.876	9.85066	9.63954	9.19397	79.6667	339	2.61007	9.56139	1.87313	2.55e-06	1.07e-05	RFC1	sp|P35251|RFC1_HUMAN Replication factor C subunit 1 OS=Homo sapiens GN=RFC1 PE=1 SV=4//1.85833e-07	GO:0005634//GO:0005663	GO:0003689//GO:0005515//GO:0003677//GO:0005524	GO:0006260
GOAT_ENSBTAP00000019322	21	17	8	400	448	424	2.33156	1.91234	1.01132	40.4288	44.9576	42.3146	15.3333	424	1.75174	42.567	4.60288	4.54e-37	2.09e-34	SFXN1	sp|B2LU20|SFXN1_SHEEP Sideroflexin-1 OS=Ovis aries GN=SFXN1 PE=2 SV=1//5.32299e-31	GO:0016020//GO:0016021//GO:0005739//GO:0031966//GO:0005743	GO:0008324	GO:0030218//GO:0006812//GO:0006811//GO:0006810//GO:0055072//GO:0006826//GO:0055085
GOAT_ENSBTAP00000019429	110	66	59	632	820	557	28.3796	17.2523	17.3316	148.435	191.217	129.172	78.3333	669.667	20.9879	156.275	2.89646	4.52e-12	5.31e-11	EFHD1	sp|Q17QM6|EFHD1_BOVIN EF-hand domain-containing protein D1 OS=Bos taurus GN=EFHD1 PE=2 SV=1//4.55095e-71	GO:0005743//GO:0005739	GO:0005509	GO:0031175
GOAT_ENSBTAP00000019451	818	1158	878	316	318	381	118.764	170.345	145.144	41.7661	41.7309	49.7227	951.333	338.333	144.751	44.4066	-1.70473	9.59e-10	7.4e-09	EXOSC4	sp|Q7YRA3|EXOS4_BOVIN Exosome complex component RRP41 OS=Bos taurus GN=EXOSC4 PE=2 SV=3//2.55589e-26	GO:0005737//GO:0005730//GO:0005634//GO:0000178//GO:0035327	GO:0016787//GO:0004518//GO:0017091//GO:0005515//GO:0004527//GO:0003723	GO:0071044//GO:0045006//GO:0071028//GO:0051607//GO:0030307//GO:0000460//GO:0090305//GO:0000956//GO:0006364
GOAT_ENSBTAP00000019468	25	58	17	233	250	204	1.87954	4.41802	1.45523	15.9467	16.9883	13.786	33.3333	229	2.58426	15.5737	2.59128	7.5e-10	5.88e-09	WASF3	sp|Q9UPY6|WASF3_HUMAN Wiskott-Aldrich syndrome protein family member 3 OS=Homo sapiens GN=WASF3 PE=1 SV=2//1.23753e-10	GO:0030027	GO:0003779	GO:0007010//GO:0030032//GO:0031643//GO:0008360//GO:0014003
GOAT_ENSBTAP00000019501	159	271	182	775	1166	820	5.77709	9.97632	7.52933	25.6341	38.2921	26.7808	204	920.333	7.76091	30.2357	1.96195	0.000229709	0.000679794	CNTN2	sp|Q02246|CNTN2_HUMAN Contactin-2 OS=Homo sapiens GN=CNTN2 PE=1 SV=1//0	GO:0030424//GO:0043209//GO:0044224//GO:0043005//GO:0043025//GO:0009986//GO:0008076//GO:0033268	GO:0001948//GO:0043621//GO:0030246//GO:0005515	GO:0048710//GO:0007612//GO:0031133//GO:0022010//GO:0001764//GO:0031175//GO:0007411//GO:0007413//GO:0048168//GO:0021853//GO:0045665//GO:0010769//GO:0060168//GO:0034613//GO:0007628//GO:0010954//GO:0045163//GO:0031623//GO:0000226//GO:0071205//GO:0071206
GOAT_ENSBTAP00000019507	19	18	21	242	226	198	1.88224	1.80668	2.36872	21.8243	20.2362	17.6313	19.3333	222	2.01921	19.8972	3.3007	1.89e-16	4.82e-15	NFATC2IP	sp|Q8NCF5|NF2IP_HUMAN NFATC2-interacting protein OS=Homo sapiens GN=NFATC2IP PE=1 SV=1//7.87728e-10	--	GO:0005515	GO:0001816//GO:0006355
GOAT_ENSBTAP00000019529	2490	3196	2680	1318	1229	1336	595.302	774.165	729.534	286.852	265.576	287.106	2788.67	1294.33	699.667	279.845	-1.32204	6.19e-11	5.91e-10	NDUFA12	sp|O97725|NDUAC_BOVIN NADH dehydrogenase [ubiquinone] 1 alpha subcomplex subunit 12 OS=Bos taurus GN=NDUFA12 PE=1 SV=1//1.52802e-22	GO:0005737//GO:0016020//GO:0005739//GO:0005743//GO:0005747//GO:0070469	GO:0008137//GO:0009055	GO:0022900//GO:0006979
GOAT_ENSBTAP00000019562	411	509	355	1743	1954	1902	13.547	16.9984	13.323	52.3001	58.2135	56.3519	425	1866.33	14.6228	55.6218	1.92743	3.64e-09	2.53e-08	SMARCC2	sp|Q8TAQ2|SMRC2_HUMAN SWI/SNF complex subunit SMARCC2 OS=Homo sapiens GN=SMARCC2 PE=1 SV=1//0	GO:0017053//GO:0005634//GO:0016514//GO:0071565//GO:0071564	GO:0003677//GO:0005515	GO:0006338//GO:0006337//GO:0045892//GO:0045893
GOAT_ENSBTAP00000019577	1843	1897	1647	1067	1085	1074	325.58	339.539	331.284	171.594	173.245	170.544	1795.67	1075.33	332.134	171.794	-0.951084	3.75e-15	7.72e-14	CLPP	sp|Q2KHU4|CLPP_BOVIN Putative ATP-dependent Clp protease proteolytic subunit, mitochondrial OS=Bos taurus GN=CLPP PE=2 SV=1//2.25416e-11	GO:0005739//GO:0005759	GO:0016787//GO:0004252//GO:0000166//GO:0005515//GO:0008233//GO:0005524//GO:0008236	GO:0006508
GOAT_ENSBTAP00000019656	3882	3689	3014	2602	2580	2538	653.589	629.285	577.785	398.806	392.616	384.095	3528.33	2573.33	620.22	391.839	-0.662518	2.79e-11	2.85e-10	GUK1	sp|P46195|KGUA_BOVIN Guanylate kinase OS=Bos taurus GN=GUK1 PE=1 SV=2//6.23536e-34	--	GO:0016301//GO:0004385//GO:0000166//GO:0016740//GO:0005515//GO:0005524	GO:0016310//GO:0006163
GOAT_ENSBTAP00000019738	1287	1822	1514	611	552	623	369.23	529.61	494.559	159.575	143.139	160.659	1541	595.333	464.467	154.458	-1.58836	5.76e-09	3.86e-08	MRPL52	sp|P0C2B7|RM52_BOVIN 39S ribosomal protein L52, mitochondrial OS=Bos taurus GN=MRPL52 PE=1 SV=1//7.71934e-12	GO:0005840//GO:0005739//GO:0030529//GO:0005762	GO:0003735	GO:0006412
GOAT_ENSBTAP00000019758	4198	2982	2786	33345	30739	31238	495.22	356.412	374.205	3580.89	3277.51	3312.35	3322	31774	408.612	3390.25	3.05259	1.41e-30	2.84e-28	SPARC	sp|Q5R767|SPRC_PONAB SPARC OS=Pongo abelii GN=SPARC PE=2 SV=1//1.06696e-18	GO:0005604//GO:0005615//GO:0005576//GO:0031012//GO:0005578	GO:0050840//GO:0005515//GO:0005509	GO:0042127//GO:0071363//GO:0060348//GO:0007165
GOAT_ENSBTAP00000019848	27	14	18	356	375	391	0.286638	0.150587	0.217578	3.44052	3.59832	3.73116	19.6667	374	0.218267	3.59	4.03982	3.51e-29	6.1e-27	VCAN	sp|P81282|CSPG2_BOVIN Versican core protein OS=Bos taurus GN=VCAN PE=1 SV=2//0	GO:0005615//GO:0031012//GO:0005576//GO:0005578	GO:0005540//GO:0030246//GO:0005509//GO:0005515	GO:0007507//GO:0007155//GO:0008347
GOAT_ENSBTAP00000019857	80	47	49	291	454	314	12.1052	7.20556	8.44209	40.0847	62.092	42.7079	58.6667	353	9.25094	48.2949	2.3842	3.48e-06	1.42e-05	GJC2	sp|Q29RK8|CXG2_BOVIN Gap junction gamma-2 protein OS=Bos taurus GN=GJC2 PE=2 SV=1//2.09279e-60	GO:0043209//GO:0016021//GO:0016020//GO:0005886//GO:0005922//GO:0030054//GO:0005921	GO:0005243	GO:0009636//GO:0007267//GO:0007154
GOAT_ENSBTAP00000019928	2091	2047	2140	1314	1237	1341	815.071	808.441	949.791	466.274	435.823	469.859	2092.67	1297.33	857.768	457.319	-0.907387	1.99e-14	3.59e-13	LAMTOR5	sp|Q66X52|LTOR5_PIG Ragulator complex protein LAMTOR5 OS=Sus scrofa GN=LAMTOR5 PE=3 SV=2//1.70402e-60	GO:0005737//GO:0005829	--	GO:0043154
GOAT_ENSBTAP00000019969	1833	1990	1651	940	722	748	513.549	564.887	526.671	239.746	182.833	188.373	1824.67	803.333	535.035	203.651	-1.39354	6.27e-23	4.68e-21	POLR2I	sp|Q32P73|RPB9_BOVIN DNA-directed RNA polymerase II subunit RPB9 OS=Bos taurus GN=POLR2I PE=2 SV=1//2.07936e-06	GO:0005634//GO:0005665	GO:0003677//GO:0003676//GO:0003899//GO:0004672//GO:0046872//GO:0008270	GO:0006468//GO:0006351//GO:0006366
GOAT_ENSBTAP00000019973	4702	5090	4128	2528	2793	3216	685.451	751.798	685.183	335.487	368.014	421.413	4640	2845.67	707.477	374.971	-0.915904	4.24e-15	8.61e-14	TBCB	sp|Q5E951|TBCB_BOVIN Tubulin-folding cofactor B OS=Bos taurus GN=TBCB PE=2 SV=1//4.08309e-168	GO:0005737//GO:0005856//GO:0005829//GO:0005634//GO:0005874	GO:0005515	GO:0007023//GO:0007399//GO:0030154//GO:0007275
GOAT_ENSBTAP00000019979	3105	3660	2838	1569	1514	1362	576.944	689.036	600.423	265.399	254.271	227.482	3201	1481.67	622.134	249.051	-1.32079	1.29e-16	3.37e-15	MRPL11	sp|Q2YDI0|RM11_BOVIN 39S ribosomal protein L11, mitochondrial OS=Bos taurus GN=MRPL11 PE=1 SV=2//5.89894e-23	GO:0005840//GO:0005739//GO:0030529	GO:0003735//GO:0005515	GO:0006412
GOAT_ENSBTAP00000019980	4293	5302	4823	1867	1842	2019	1399.58	1751.32	1790.3	554.097	542.781	591.658	4806	1909.33	1647.07	562.845	-1.54909	9.11e-13	1.22e-11	LAMTOR4	sp|Q2M2U3|LTOR4_BOVIN Ragulator complex protein LAMTOR4 OS=Bos taurus GN=LAMTOR4 PE=3 SV=2//7.155e-21	GO:0005764//GO:0071986	GO:0005085//GO:0032947	GO:0071230//GO:0008361//GO:0032008
GOAT_ENSBTAP00000020018	4833	5703	4854	2231	2130	2199	1733.19	2072.15	1981.99	728.339	690.411	708.846	5130	2186.67	1929.11	709.199	-1.44367	3.82e-17	1.11e-15	NDUFA2	sp|Q02370|NDUA2_BOVIN NADH dehydrogenase [ubiquinone] 1 alpha subcomplex subunit 2 OS=Bos taurus GN=NDUFA2 PE=1 SV=2//5.45825e-18	GO:0016020//GO:0005739//GO:0031966//GO:0005743//GO:0005747//GO:0070469	--	GO:0022900
GOAT_ENSBTAP00000020032	675	479	327	2146	2453	2566	44.4973	31.993	24.5443	128.785	146.159	152.049	493.667	2388.33	33.6782	142.331	2.07936	4.61e-11	4.52e-10	HCN2	sp|Q9UL51|HCN2_HUMAN Potassium/sodium hyperpolarization-activated cyclic nucleotide-gated channel 2 OS=Homo sapiens GN=HCN2 PE=1 SV=3//0	GO:0016020//GO:0016021	GO:0005515//GO:0005216//GO:0005249	GO:0042391//GO:0006813//GO:0006811//GO:0006810//GO:0055085
GOAT_ENSBTAP00000020036	81	34	37	311	376	373	17.3939	7.39743	9.04664	60.7964	72.9793	71.9978	50.6667	353.333	11.2793	68.5912	2.60434	8.73e-13	1.18e-11	CFL2	sp|Q5G6V9|COF2_PIG Cofilin-2 OS=Sus scrofa GN=CFL2 PE=2 SV=4//9.75211e-09	GO:0005737//GO:0005856//GO:0005634//GO:0005622//GO:0016363	GO:0003779//GO:0005515	--
GOAT_ENSBTAP00000020055	51	40	32	247	295	273	4.56094	3.62438	3.25843	20.1088	23.8455	21.9455	41	271.667	3.81458	21.9666	2.52571	6.57e-11	6.23e-10	Lancl1	sp|Q9QX69|LANC1_RAT LanC-like protein 1 OS=Rattus norvegicus GN=Lancl1 PE=2 SV=2//8.57069e-08	GO:0015630//GO:0043231	GO:0017124//GO:0003824//GO:0008270//GO:0043295//GO:0050750	GO:0008152
GOAT_ENSBTAP00000020101	58	31	34	265	220	242	5.11049	2.76749	3.41104	21.2562	17.5209	19.1667	41	242.333	3.76301	19.3146	2.35973	4.8e-09	3.25e-08	HERPUD2	sp|Q0P5H8|HERP2_BOVIN Homocysteine-responsive endoplasmic reticulum-resident ubiquitin-like domain member 2 protein OS=Bos taurus GN=HERPUD2 PE=2 SV=1//0	GO:0016020//GO:0016021	GO:0005515	GO:0007283//GO:0006986
GOAT_ENSBTAP00000020105	17	24	19	210	241	186	1.86436	2.66675	2.37251	20.9655	23.889	18.3355	20	212.333	2.30121	21.0633	3.19427	3.6e-15	7.41e-14	TOB2	sp|Q14106|TOB2_HUMAN Protein Tob2 OS=Homo sapiens GN=TOB2 PE=1 SV=2//2.01022e-49	--	GO:0042809	GO:0045778//GO:0010468//GO:0045671
GOAT_ENSBTAP00000020114	2194	3509	2625	992	948	994	401.43	650.497	546.859	165.23	156.776	163.477	2776	978	532.929	161.828	-1.71948	4.22e-07	2.04e-06	GADD45GIP1	sp|A1A4P4|G45IP_BOVIN Growth arrest and DNA damage-inducible proteins-interacting protein 1 OS=Bos taurus GN=GADD45GIP1 PE=2 SV=1//1.56977e-60	GO:0005634//GO:0005739	GO:0005515	GO:0007049
GOAT_ENSBTAP00000020140	18	7	8	182	220	197	1.35896	0.535455	0.687699	12.5087	15.0126	13.369	11	199.667	0.860706	13.6301	3.98513	1.77e-20	8.88e-19	RUNDC1	sp|Q96C34|RUND1_HUMAN RUN domain-containing protein 1 OS=Homo sapiens GN=RUNDC1 PE=1 SV=3//0
GOAT_ENSBTAP00000020215	1071	1318	953	697	586	660	408.593	509.455	413.969	242.069	202.068	226.33	1114	647.667	444.005	223.489	-0.990373	3.06e-10	2.57e-09	BOLA3	sp|Q3SZ84|BOLA3_BOVIN BolA-like protein 3 OS=Bos taurus GN=BOLA3 PE=3 SV=1//7.56153e-51	GO:0005576	--	--
GOAT_ENSBTAP00000020243	2631	1311	1497	8769	8258	9439	378.923	191.303	245.485	1149.7	1074.99	1221.95	1813	8822	271.903	1148.88	2.07906	7.89e-12	8.9e-11	CA3	sp|Q3SZX4|CAH3_BOVIN Carbonic anhydrase 3 OS=Bos taurus GN=CA3 PE=2 SV=3//1.49136e-13	GO:0005737	GO:0016151//GO:0046872//GO:0008270//GO:0004089//GO:0016829	GO:0006730
GOAT_ENSBTAP00000020366	21	18	11	199	142	203	0.68463	0.594563	0.408322	5.90601	4.18431	5.94881	16.6667	181.333	0.562505	5.34638	3.24862	3.91e-14	6.76e-13	Slc4a10	sp|Q80ZA5|S4A10_RAT Sodium-driven chloride bicarbonate exchanger OS=Rattus norvegicus GN=Slc4a10 PE=2 SV=1//1.81229e-11	GO:0016021//GO:0016020//GO:0016323	GO:0015301//GO:0005215//GO:0005452//GO:0008509	GO:0006810//GO:0006885//GO:0006820
GOAT_ENSBTAP00000020398	869	1052	920	529	528	560	66.0248	80.9826	79.5881	36.5887	36.2593	38.2449	947	539	75.5318	37.031	-1.02835	4.96e-11	4.84e-10	WDR34	sp|Q96EX3|WDR34_HUMAN WD repeat-containing protein 34 OS=Homo sapiens GN=WDR34 PE=1 SV=2//8.65003e-06	--	GO:0005515	--
GOAT_ENSBTAP00000020418	114	110	83	554	738	603	11.1093	10.8608	9.20943	49.1469	65.0035	52.8198	102.333	631.667	10.3932	55.6567	2.42092	3.03e-13	4.41e-12	Zdhhc9	sp|P59268|ZDHC9_MOUSE Palmitoyltransferase ZDHHC9 OS=Mus musculus GN=Zdhhc9 PE=2 SV=1//9.4598e-29	GO:0005737//GO:0005794//GO:0005783//GO:0016021//GO:0016020//GO:0005739//GO:0000139//GO:0005789	GO:0046872//GO:0016740//GO:0016746//GO:0005515//GO:0008270	GO:0007610
GOAT_ENSBTAP00000020452	11681	12971	11851	6552	6128	6495	2216.4	2493.62	2560.33	1131.74	1050.96	1107.76	12167.7	6391.67	2423.45	1096.82	-1.14374	4.05e-17	1.17e-15	RPL18	sp|Q5E973|RL18_BOVIN 60S ribosomal protein L18 OS=Bos taurus GN=RPL18 PE=2 SV=3//2.05164e-08	GO:0005737//GO:0005840//GO:0022625//GO:0030529//GO:0005622	GO:0003735	GO:0006412
GOAT_ENSBTAP00000020579	1753	1726	1856	1195	1052	1190	182.748	182.306	220.304	113.408	99.1255	111.51	1778.33	1145.67	195.119	108.015	-0.853129	4.09e-12	4.86e-11	Cd2bp2	sp|Q9CWK3|CD2B2_MOUSE CD2 antigen cytoplasmic tail-binding protein 2 OS=Mus musculus GN=Cd2bp2 PE=1 SV=1//6.18791e-07	GO:0016607//GO:0005634//GO:0005654//GO:0005682	GO:0005515//GO:0043021	GO:0010923
GOAT_ENSBTAP00000020600	1973	2175	1738	1318	1393	1500	116.95	130.624	117.3	71.1203	74.6318	79.9214	1962	1403.67	121.625	75.2245	-0.69316	2.19e-11	2.29e-10	VPS51	sp|A6QQ47|VPS51_BOVIN Vacuolar protein sorting-associated protein 51 homolog OS=Bos taurus GN=VPS51 PE=2 SV=1//1.9757e-135	GO:0005794//GO:0000938//GO:0005634//GO:0000775	GO:0005515	GO:0042147//GO:0007067//GO:0006914
GOAT_ENSBTAP00000020610-D2	60	51	37	620	647	596	5.67729	4.88933	3.98625	53.4055	55.3341	50.6914	49.3333	621	4.85096	53.1437	3.45356	4.04e-27	5.38e-25	FADS1	sp|O60427|FADS1_HUMAN Fatty acid desaturase 1 OS=Homo sapiens GN=FADS1 PE=1 SV=1//1.92117e-07	--	GO:0020037//GO:0016717//GO:0016491//GO:0005506//GO:0046872	GO:0006633//GO:0006629//GO:0009267//GO:0055114//GO:0006636
GOAT_ENSBTAP00000020690	43	20	26	317	417	318	2.49119	1.17397	1.71508	16.7187	21.836	16.5601	29.6667	350.667	1.79341	18.3716	3.3567	9.51e-20	4.3e-18	GCLC	sp|P48506|GSH1_HUMAN Glutamate--cysteine ligase catalytic subunit OS=Homo sapiens GN=GCLC PE=1 SV=2//0
GOAT_ENSBTAP00000020716	43	27	29	391	353	411	2.1842	1.38956	1.67724	18.0803	16.2068	18.7657	33	385	1.75033	17.6843	3.33676	1.72e-21	1.01e-19	SLCO2B1	sp|O94956|SO2B1_HUMAN Solute carrier organic anion transporter family member 2B1 OS=Homo sapiens GN=SLCO2B1 PE=1 SV=2//0	GO:0016021//GO:0016020	GO:0008514//GO:0005215//GO:0015347	GO:0006810//GO:0015711//GO:0055085
GOAT_ENSBTAP00000020719	14627	15636	14151	9057	8215	8486	3159.92	3422.44	3480.82	1781.19	1604.09	1647.87	14804.7	8586	3354.39	1677.71	-0.999555	1.19e-16	3.13e-15	RPS10	sp|P46783|RS10_HUMAN 40S ribosomal protein S10 OS=Homo sapiens GN=RPS10 PE=1 SV=1//2.25881e-09	GO:0005737//GO:0005634//GO:0030529//GO:0005840//GO:0005730	--	--
GOAT_ENSBTAP00000020765	1322	1387	1062	843	709	756	169.318	179.985	154.871	98.2886	82.076	87.0344	1257	769.333	168.058	89.133	-0.914926	2.26e-14	4.04e-13		sp|Q32L09|CS066_BOVIN UPF0515 protein C19orf66 homolog OS=Bos taurus PE=2 SV=1//3.3312e-168
GOAT_ENSBTAP00000020807	26	20	11	186	226	208	4.27707	3.33343	2.06034	27.8542	33.6032	30.7563	19	206.667	3.22361	30.7379	3.25327	3.6e-15	7.41e-14	TMEM127	sp|O75204|TM127_HUMAN Transmembrane protein 127 OS=Homo sapiens GN=TMEM127 PE=1 SV=1//1.58395e-28	GO:0005886//GO:0005737	--	GO:0032007//GO:0008285
GOAT_ENSBTAP00000020832	1241	1319	980	834	766	770	412.076	443.751	370.514	252.102	229.897	229.823	1180	790	408.78	237.274	-0.784771	2.06e-12	2.57e-11	COX16	sp|Q2NKS2|COX16_BOVIN Cytochrome c oxidase assembly protein COX16 homolog, mitochondrial OS=Bos taurus GN=COX16 PE=3 SV=1//3.02422e-71	GO:0016021//GO:0016020//GO:0005739//GO:0031966	--	--
GOAT_ENSBTAP00000020940	106	67	83	399	414	462	6.72801	4.30868	5.99835	23.0546	23.7509	26.3585	85.3333	425	5.67835	24.388	2.10263	9.5e-09	6.13e-08	YTHDF2	sp|Q0VCZ3|YTHD2_BOVIN YTH domain family protein 2 OS=Bos taurus GN=YTHDF2 PE=2 SV=1//1.12705e-07
GOAT_ENSBTAP00000021029	114	123	109	846	753	634	8.5349	9.33013	9.29166	57.6592	50.9551	42.6659	115.333	744.333	9.05223	50.4267	2.47784	1.3e-14	2.43e-13	ENPP5	sp|Q9UJA9|ENPP5_HUMAN Ectonucleotide pyrophosphatase/phosphodiesterase family member 5 OS=Homo sapiens GN=ENPP5 PE=1 SV=1//1.0308e-25
GOAT_ENSBTAP00000021041	627	344	248	2291	2120	2200	40.8822	22.7255	18.4116	135.987	124.94	128.94	406.333	2203.67	27.3398	129.955	2.24894	3.01e-13	4.39e-12	ARHGEF4	sp|Q9NR80|ARHG4_HUMAN Rho guanine nucleotide exchange factor 4 OS=Homo sapiens GN=ARHGEF4 PE=1 SV=3//0	GO:0005622	GO:0005089//GO:0030676//GO:0005543//GO:0005085//GO:0019904//GO:0005515	GO:0030032//GO:0035023//GO:0035556//GO:0046847
GOAT_ENSBTAP00000021123	3354	4174	3395	1627	1475	1561	918.165	1157.71	1058.21	405.462	364.963	384.113	3641	1554.33	1044.69	384.846	-1.44073	1.01e-13	1.63e-12	NDUFB4	sp|P48305|NDUB4_BOVIN NADH dehydrogenase [ubiquinone] 1 beta subcomplex subunit 4 OS=Bos taurus GN=NDUFB4 PE=1 SV=2//9.61793e-87	GO:0005739	GO:0008137	--
GOAT_ENSBTAP00000021130	35	27	31	280	294	265	5.62849	4.39923	5.67622	40.9909	42.7337	38.3061	31	279.667	5.23465	40.6769	2.95804	3.86e-15	7.94e-14	RABL3	sp|Q32LJ6|RABL3_BOVIN Rab-like protein 3 OS=Bos taurus GN=RABL3 PE=2 SV=2//2.51372e-13	--	GO:0005525//GO:0000166	GO:0007264
GOAT_ENSBTAP00000021132	1371	1402	1227	962	914	1022	214.699	222.449	218.782	137.143	129.372	143.861	1333.33	966	218.644	136.792	-0.676599	6.61e-11	6.25e-10	CNPY3	sp|Q0P5N1|CNPY3_BOVIN Protein canopy homolog 3 OS=Bos taurus GN=CNPY3 PE=2 SV=1//1.83552e-142	--	GO:0005102	--
GOAT_ENSBTAP00000021203	1572	1376	1310	1102	1051	1110	186.67	165.55	177.12	119.127	112.804	118.479	1419.33	1087.67	176.447	116.803	-0.595151	6.43e-10	5.12e-09	WDR61	sp|Q32LN7|WDR61_BOVIN WD repeat-containing protein 61 OS=Bos taurus GN=WDR61 PE=2 SV=1//1.09183e-10	GO:0005737//GO:0035327//GO:0016593//GO:0005634//GO:0055087	GO:0005515	GO:2001162//GO:0016055//GO:0006355//GO:0045638//GO:0045944//GO:0006351//GO:0051571//GO:0032968//GO:0080182
GOAT_ENSBTAP00000021218	52	48	47	246	271	280	6.40825	5.99331	6.59488	27.5979	30.1859	31.0164	49	265.667	6.33215	29.6001	2.22483	1.9e-08	1.16e-07	ERGIC1	sp|Q969X5|ERGI1_HUMAN Endoplasmic reticulum-Golgi intermediate compartment protein 1 OS=Homo sapiens GN=ERGIC1 PE=1 SV=1//0	GO:0005793	GO:0005515	GO:0006888
GOAT_ENSBTAP00000021249	1275	1317	1059	608	571	618	371.736	389.044	351.555	161.374	150.473	161.961	1217	599	370.778	157.936	-1.23122	1.93e-19	8.23e-18	GLRX2	sp|Q32L67|GLRX2_BOVIN Glutaredoxin-2, mitochondrial OS=Bos taurus GN=GLRX2 PE=2 SV=1//2.94176e-85	GO:0005634//GO:0005739	GO:0051537//GO:0051536//GO:0046872//GO:0015035//GO:0009055	GO:0042542//GO:0022900//GO:0045454//GO:0010033
GOAT_ENSBTAP00000021267	102	64	55	500	526	513	5.0384	3.20303	3.09335	22.4837	23.4843	22.7776	73.6667	513	3.77826	22.9152	2.60051	1.71e-14	3.14e-13	ASPH	sp|Q28056|ASPH_BOVIN Aspartyl/asparaginyl beta-hydroxylase OS=Bos taurus GN=ASPH PE=1 SV=1//3.42403e-13	GO:0005783//GO:0030176//GO:0005737//GO:0016021//GO:0016020//GO:0032541//GO:0005886//GO:0005789	GO:0016491//GO:0016702//GO:0005515//GO:0004597	GO:0035108//GO:0060021//GO:0060325//GO:0007389//GO:0032237//GO:0018193//GO:0010524//GO:0008285//GO:0090316//GO:0031585//GO:0071277//GO:0055114//GO:0042264//GO:0031647//GO:0070588//GO:0045862//GO:0033198//GO:0045893
GOAT_ENSBTAP00000021310	59	38	39	254	239	295	3.62921	2.36828	2.73148	14.2233	13.2879	16.311	45.3333	262.667	2.90966	14.6074	2.32778	3.85e-09	2.66e-08	KLHL7	sp|Q8IXQ5|KLHL7_HUMAN Kelch-like protein 7 OS=Homo sapiens GN=KLHL7 PE=1 SV=2//0	GO:0005737//GO:0005730//GO:0005634//GO:0005886//GO:0031463	GO:0005515//GO:0042803	--
GOAT_ENSBTAP00000021325	93	63	73	313	360	309	3.53297	2.42486	3.15757	10.8245	12.3611	10.5515	76.3333	327.333	3.03847	11.2457	1.88796	2.51e-06	1.05e-05	GAA	sp|Q9MYM4|LYAG_BOVIN Lysosomal alpha-glucosidase OS=Bos taurus GN=GAA PE=2 SV=1//6.1232e-20	GO:0016020//GO:0005764//GO:0005765	GO:0016798//GO:0032450//GO:0030246//GO:0003824//GO:0016787//GO:0004553//GO:0004558	GO:0055010//GO:0046716//GO:0006941//GO:0002086//GO:0007040//GO:0060048//GO:0007517//GO:0043181//GO:0050885//GO:0050884//GO:0005980//GO:0002026//GO:0043587//GO:0007626//GO:0009888//GO:0003007//GO:0008152//GO:0005975//GO:0005977
GOAT_ENSBTAP00000021345	54	69	45	412	417	454	1.14182	1.47823	1.0834	7.93058	7.96963	8.62893	56	427.667	1.23448	8.17638	2.72756	3.15e-15	6.55e-14	GCC2	sp|Q8IWJ2|GCC2_HUMAN GRIP and coiled-coil domain-containing protein 2 OS=Homo sapiens GN=GCC2 PE=1 SV=4//1.34896e-10	GO:0005737//GO:0005794//GO:0005634//GO:0016020//GO:0005802	GO:0005515//GO:0000166//GO:0042802	GO:0034453//GO:0031023//GO:0016192//GO:0034067//GO:0090161//GO:0006622//GO:0000042//GO:0071955//GO:0042147//GO:0070861//GO:0034499
GOAT_ENSBTAP00000021386	239	65	88	811	821	886	52.9069	14.5786	22.1804	163.433	164.269	176.297	130.667	839.333	29.8886	168	2.49079	4.93e-13	6.93e-12	ARF4	sp|Q3SZF2|ARF4_BOVIN ADP-ribosylation factor 4 OS=Bos taurus GN=ARF4 PE=2 SV=3//3.95364e-115	GO:0005737//GO:0005794//GO:0005622//GO:0005886//GO:0005634	GO:0000166//GO:0019001//GO:0005515//GO:0004871//GO:0005525	GO:0016192//GO:0006886//GO:0006810//GO:0015031//GO:0007264//GO:0007186
GOAT_ENSBTAP00000021480	41	21	19	317	344	318	0.98945	0.513474	0.52208	6.96425	7.50357	6.89819	27	326.333	0.675002	7.122	3.39932	1.58e-20	8.01e-19	ZNF608	sp|Q9ULD9|ZN608_HUMAN Zinc finger protein 608 OS=Homo sapiens GN=ZNF608 PE=1 SV=4//0	GO:0005622	GO:0008270	--
GOAT_ENSBTAP00000021482	1375	1670	1367	999	1036	1055	154.093	189.62	174.43	101.918	104.939	106.275	1470.67	1030	172.714	104.377	-0.726581	2.41e-09	1.73e-08	Tmem120a	sp|Q8C1E7|T120A_MOUSE Transmembrane protein 120A OS=Mus musculus GN=Tmem120a PE=2 SV=1//9.37481e-37	GO:0016021//GO:0016020	--	--
GOAT_ENSBTAP00000021559	41	30	28	559	570	464	2.33015	1.72747	1.81189	28.9212	29.2802	23.7037	33	531	1.9565	27.3017	3.80264	1.49e-30	2.93e-28	CLINT1	sp|A7Z035|EPN4_BOVIN Clathrin interactor 1 OS=Bos taurus GN=CLINT1 PE=2 SV=1//3.6917e-19	GO:0005737//GO:0005794//GO:0005802//GO:0031410//GO:0016020//GO:0005798//GO:0048471//GO:0030136	GO:0008289//GO:0005543//GO:0005515//GO:0030276	GO:0006897
GOAT_ENSBTAP00000021569	33	31	32	300	287	259	1.72764	1.64433	1.90749	14.2976	13.5806	12.1881	32	282	1.75982	13.3555	2.92393	6.97e-15	1.36e-13	TGM2	sp|P51176|TGM2_BOVIN Protein-glutamine gamma-glutamyltransferase 2 OS=Bos taurus GN=TGM2 PE=1 SV=1//4.63319e-15	GO:0005737//GO:0016020//GO:0005576	GO:0003810//GO:0008289//GO:0016740//GO:0016746//GO:0005515//GO:0046872//GO:0001530	GO:0018149//GO:0045785//GO:0032720//GO:0032715//GO:0032717//GO:0043031//GO:0060445//GO:0043277//GO:0060662//GO:0042742
GOAT_ENSBTAP00000021587	16533	19024	18309	9105	7883	8030	4060.95	4734.42	5120.52	2035.92	1750.12	1772.92	17955.3	8339.33	4638.63	1852.99	-1.32385	3.42e-13	4.95e-12	Rps7	sp|P62083|RS7_RAT 40S ribosomal protein S7 OS=Rattus norvegicus GN=Rps7 PE=1 SV=1//9.79405e-09	GO:0005737//GO:0005856//GO:0032040//GO:0030529//GO:0005634//GO:0005730//GO:0030686//GO:0005622//GO:0005815//GO:0022627//GO:0005840	GO:0003735//GO:0005515	GO:0042274//GO:0006364//GO:0006412
GOAT_ENSBTAP00000021594	52	24	27	292	310	290	3.7	1.73021	2.18744	18.9141	19.937	18.5479	34.3333	297.333	2.53922	19.133	2.91361	6.3e-15	1.24e-13	nmd3	sp|Q6GNS3|NMD3_XENLA 60S ribosomal export protein NMD3 OS=Xenopus laevis GN=nmd3 PE=2 SV=1//6.85872e-14	GO:0005737//GO:0005730//GO:0005634//GO:0005654	--	GO:0006810//GO:0015031
GOAT_ENSBTAP00000021613	53	29	19	473	423	426	1.74533	0.967583	0.712407	14.1797	12.5904	12.6098	33.6667	440.667	1.14177	13.1266	3.52315	1.15e-24	1.16e-22	RBL2	sp|Q08999|RBL2_HUMAN Retinoblastoma-like protein 2 OS=Homo sapiens GN=RBL2 PE=1 SV=3//0	GO:0005737//GO:0005730//GO:0005634//GO:0005667	GO:0005515	GO:0043550//GO:0051726
GOAT_ENSBTAP00000021686	73	52	58	723	724	700	4.70844	3.39818	4.25947	42.4519	42.2077	40.5836	61	715.667	4.12203	41.7477	3.34027	8.9e-27	1.14e-24	Tm9sf3	sp|Q9ET30|TM9S3_MOUSE Transmembrane 9 superfamily member 3 OS=Mus musculus GN=Tm9sf3 PE=1 SV=1//9.49419e-11	GO:0016021	--	--
GOAT_ENSBTAP00000021771	42	22	19	221	240	193	10.6069	5.62928	5.46346	50.8087	54.7837	43.8123	27.6667	218	7.23322	49.8015	2.78348	8.13e-12	9.17e-11	Tsen15	sp|Q8R3W5|SEN15_MOUSE tRNA-splicing endonuclease subunit Sen15 OS=Mus musculus GN=Tsen15 PE=2 SV=1//9.82418e-96	--	GO:0004519	--
GOAT_ENSBTAP00000021860	1067	1077	1076	628	618	675	84.2825	86.1942	96.774	45.1583	44.1226	47.9264	1073.33	640.333	89.0836	45.7358	-0.961837	1.14e-14	2.15e-13	ZNF622	sp|Q969S3|ZN622_HUMAN Zinc finger protein 622 OS=Homo sapiens GN=ZNF622 PE=1 SV=1//6.81617e-73	GO:0005737//GO:0005730//GO:0005622//GO:0005794	GO:0003676//GO:0005515//GO:0008270	GO:0043410//GO:0008631//GO:0033674//GO:0043065//GO:0046330
GOAT_ENSBTAP00000021892	34	27	16	210	265	203	2.58873	2.08286	1.38708	14.5557	18.237	13.8932	25.6667	226	2.01956	15.5619	2.94591	2.33e-13	3.48e-12	DHCR7	sp|Q9UBM7|DHCR7_HUMAN 7-dehydrocholesterol reductase OS=Homo sapiens GN=DHCR7 PE=1 SV=1//1.35971e-08	GO:0016020//GO:0005783//GO:0005640	GO:0047598//GO:0016628	GO:0016126//GO:0042127//GO:0030324//GO:0001568//GO:0030154//GO:0009791//GO:0035264//GO:0055114
GOAT_ENSBTAP00000021939	30	26	30	238	297	218	1.52171	1.3362	1.73262	10.9898	13.6165	9.93949	28.6667	251	1.53018	11.5153	2.91178	4.91e-14	8.34e-13	TMC7	sp|Q4R7U0|TMC7_MACFA Transmembrane channel-like protein 7 OS=Macaca fascicularis GN=TMC7 PE=2 SV=1//8.17702e-12	GO:0016021	--	--
GOAT_ENSBTAP00000021951	25	29	17	338	359	365	0.444051	0.521891	0.343807	5.4653	5.7635	5.82752	23.6667	354	0.436583	5.68544	3.70294	1.04e-24	1.07e-22	SCN1A	sp|P35498|SCN1A_HUMAN Sodium channel protein type 1 subunit alpha OS=Homo sapiens GN=SCN1A PE=1 SV=2//0	GO:0030424//GO:0014704//GO:0030018//GO:0016021//GO:0016020//GO:0043025//GO:0030315//GO:0001518//GO:0034706//GO:0043194//GO:0005624//GO:0033268	GO:0005216//GO:0005272//GO:0005248//GO:0005244	GO:0042391//GO:0019227//GO:0019228//GO:0001508//GO:0034765//GO:0050884//GO:0035725//GO:0006811//GO:0006810//GO:0006814//GO:0007628//GO:0055085
GOAT_ENSBTAP00000021952	75	58	41	539	457	562	6.24041	4.88955	3.88427	40.8268	34.369	42.0326	58	519.333	5.00474	39.0761	2.96492	4.74e-19	1.91e-17	POLDIP3	sp|Q9BY77|PDIP3_HUMAN Polymerase delta-interacting protein 3 OS=Homo sapiens GN=POLDIP3 PE=1 SV=2//2.5909e-08	GO:0016607//GO:0035145//GO:0043231//GO:0005634	GO:0000166//GO:0005515//GO:0003676	GO:0045727
GOAT_ENSBTAP00000021955	711	332	328	7050	7106	7227	67.9935	32.1681	35.7145	613.75	614.217	621.232	457	7127.67	45.292	616.4	3.76654	2.97e-46	4.84e-43	CPE	sp|P04836|CBPE_BOVIN Carboxypeptidase E OS=Bos taurus GN=CPE PE=1 SV=2//0	GO:0005794//GO:0031410//GO:0016020//GO:0030658//GO:0005576	GO:0004180//GO:0016787//GO:0004181//GO:0042043//GO:0050839//GO:0008233//GO:0046872//GO:0008237//GO:0008270	GO:0003214//GO:0072657//GO:0006508//GO:0030070
GOAT_ENSBTAP00000021969	1004	1678	1429	548	461	460	307.735	521.104	498.711	152.907	127.715	126.736	1370.33	489.667	442.517	135.786	-1.70439	4.3e-06	1.72e-05		sp|Q3ZBP8|CO040_BOVIN UPF0235 protein C15orf40 homolog OS=Bos taurus PE=2 SV=1//1.58307e-17
GOAT_ENSBTAP00000021978	2037	2388	2094	1211	1277	1054	251.031	298.167	293.823	135.858	142.241	116.755	2173	1180.67	281.007	131.618	-1.09425	2.89e-13	4.23e-12	PIH1D1	sp|Q9NWS0|PIHD1_HUMAN PIH1 domain-containing protein 1 OS=Homo sapiens GN=PIH1D1 PE=1 SV=1//2.1484e-30	GO:0070761	--	GO:0000492
GOAT_ENSBTAP00000021980	1820	2127	1641	1290	1230	1295	88.2	104.437	90.5481	56.9104	53.8768	56.4112	1862.67	1271.67	94.395	55.7328	-0.760184	1.2e-11	1.31e-10	NOC2L	sp|Q3SYU1|NOC2L_BOVIN Nucleolar complex protein 2 homolog OS=Bos taurus GN=NOC2L PE=2 SV=1//0	GO:0005730//GO:0005634//GO:0005654//GO:0005678	GO:0005488//GO:0003714//GO:0042393//GO:0031491//GO:0005515//GO:0003682//GO:0070491	GO:0000122//GO:0035067//GO:0006915//GO:0032066//GO:0006355//GO:0043066//GO:0006351//GO:0034644//GO:0002903
GOAT_ENSBTAP00000021995	70	47	34	259	257	284	5.87894	3.99934	3.25127	19.8018	19.5089	21.4396	50.3333	266.667	4.37652	20.2501	2.21008	3.9e-08	2.25e-07	Camk1g	sp|Q91VB2|KCC1G_MOUSE Calcium/calmodulin-dependent protein kinase type 1G OS=Mus musculus GN=Camk1g PE=1 SV=1//1.62321e-08	GO:0012505//GO:0005886//GO:0005954	GO:0004683//GO:0016301//GO:0000166//GO:0004674//GO:0016740//GO:0004672//GO:0016772//GO:0004713//GO:0005524	GO:0006468//GO:0016310
GOAT_ENSBTAP00000022033	251	202	194	1152	1132	1056	3.997	3.25913	3.51751	16.7001	16.2932	15.1155	215.667	1113.33	3.59121	16.0362	2.15879	2.1e-11	2.2e-10	GOLGA4	sp|Q13439|GOGA4_HUMAN Golgin subfamily A member 4 OS=Homo sapiens GN=GOLGA4 PE=1 SV=1//0	GO:0005737//GO:0005794	GO:0051020//GO:0005515	GO:0000042//GO:0043001
GOAT_ENSBTAP00000022040	559	778	539	238	229	199	140.186	197.68	153.906	54.3344	51.9072	44.8584	625.333	222	163.924	50.3667	-1.70248	8.37e-10	6.52e-09	HBQ1	sp|P06890|HBAT_PONPY Hemoglobin subunit theta-1 OS=Pongo pygmaeus GN=HBQ1 PE=3 SV=2//3.24786e-67	GO:0005833	GO:0005344//GO:0019825//GO:0020037//GO:0005515//GO:0005506//GO:0046872	GO:0006810//GO:0015671
GOAT_ENSBTAP00000022041	4248	4022	4098	3175	2695	2692	437.758	419.934	480.834	297.85	251.02	249.358	4122.67	2854	446.175	266.076	-0.745773	2.47e-12	3.05e-11	LUC7L	sp|Q9NQ29|LUC7L_HUMAN Putative RNA-binding protein Luc7-like 1 OS=Homo sapiens GN=LUC7L PE=1 SV=1//6.94195e-29	GO:0005634	GO:0050733//GO:0005515	GO:0045843
GOAT_ENSBTAP00000022078	2048	2190	1633	1273	1206	1298	597.109	646.93	542.105	337.876	317.812	340.17	1957	1259	595.381	331.953	-0.842836	1.2e-13	1.91e-12	Pfdn1	sp|Q9CWM4|PFD1_MOUSE Prefoldin subunit 1 OS=Mus musculus GN=Pfdn1 PE=2 SV=1//7.22284e-36	GO:0016272//GO:0005829	GO:0051082	GO:0021537//GO:0006457//GO:0051086//GO:0042113//GO:0030036//GO:0021549
GOAT_ENSBTAP00000022100	68	32	33	261	240	224	7.21475	3.43994	3.98657	25.2091	23.0156	21.3628	44.3333	241.667	4.88042	23.1958	2.24879	4.07e-08	2.34e-07	ABHD6	sp|Q1LZ86|ABHD6_BOVIN Monoacylglycerol lipase ABHD6 OS=Bos taurus GN=ABHD6 PE=2 SV=1//4.27776e-11	GO:0032281//GO:0016021//GO:0016020//GO:0005739	GO:0016787//GO:0047372	GO:0060292//GO:0030336//GO:2000124
GOAT_ENSBTAP00000022108	11	10	5	190	220	229	0.469057	0.432038	0.24276	7.3755	8.4792	8.77741	8.66667	213	0.381285	8.2107	4.42856	1.6e-24	1.59e-22	DSTYK	sp|Q4TVR5|DUSTY_BOVIN Dual serine/threonine and tyrosine protein kinase OS=Bos taurus GN=DSTYK PE=2 SV=1//8.69308e-09	GO:0005737//GO:0005634//GO:0045111	GO:0016301//GO:0000166//GO:0004674//GO:0016740//GO:0004712//GO:0004713//GO:0004672//GO:0016772//GO:0005524	GO:0006468//GO:0016310
GOAT_ENSBTAP00000022154	115	52	48	513	584	549	11.5845	5.30727	5.50546	47.0437	53.173	49.7106	71.6667	548.667	7.46574	49.9758	2.74287	1.94e-16	4.91e-15	ABHD4	sp|Q5EA59|ABHD4_BOVIN Abhydrolase domain-containing protein 4 OS=Bos taurus GN=ABHD4 PE=2 SV=1//1.35347e-10	--	GO:0016787	GO:0016042
GOAT_ENSBTAP00000022251	959	1144	1019	357	321	338	343.912	415.666	416.08	116.547	104.048	108.954	1040.67	338.667	391.886	109.85	-1.8349	3.67e-18	1.28e-16	HIGD1B	sp|Q9P298|HIG1B_HUMAN HIG1 domain family member 1B OS=Homo sapiens GN=HIGD1B PE=1 SV=1//7.2794e-57	GO:0016021//GO:0016020	--	--
GOAT_ENSBTAP00000022316	24	20	16	354	354	395	1.02706	0.86717	0.779612	13.7909	13.6926	15.1943	20	367.667	0.891281	14.2259	3.9965	2e-28	3.11e-26	SLC39A10	sp|Q9ULF5|S39AA_HUMAN Zinc transporter ZIP10 OS=Homo sapiens GN=SLC39A10 PE=1 SV=2//0	GO:0016020	GO:0046873	GO:0030001//GO:0055085
GOAT_ENSBTAP00000022382	3440	4140	3314	1852	1773	1872	920.625	1122.57	1009.83	451.201	428.876	450.327	3631.33	1832.33	1017.68	443.468	-1.19838	5.11e-14	8.65e-13	PFDN6	sp|Q17Q89|PFD6_BOVIN Prefoldin subunit 6 OS=Bos taurus GN=PFDN6 PE=2 SV=1//2.23905e-75	GO:0016272//GO:0005829	GO:0051087//GO:0051082//GO:0005515	GO:0051131//GO:0051086//GO:0006457
GOAT_ENSBTAP00000022411	160	173	132	1160	1435	1409	23.1365	25.3462	21.7332	152.7	187.555	183.141	155	1334.67	23.4053	174.466	2.89803	5.75e-23	4.34e-21	YWHAB	sp|A4K2U9|1433B_PONAB 14-3-3 protein beta/alpha OS=Pongo abelii GN=YWHAB PE=3 SV=1//6.63784e-171	GO:0005737//GO:0042470//GO:0048471	GO:0050815//GO:0051219//GO:0019899//GO:0019904//GO:0005515//GO:0042826	GO:0006605//GO:0035308//GO:0051220//GO:0043085
GOAT_ENSBTAP00000022470	405	221	278	1309	1155	1199	11.5821	6.40343	9.0521	34.0781	29.8547	30.8211	301.333	1221	9.01254	31.5847	1.80922	1.93e-07	9.86e-07	Cyfip1	sp|Q7TMB8|CYFP1_MOUSE Cytoplasmic FMR1-interacting protein 1 OS=Mus musculus GN=Cyfip1 PE=1 SV=1//4.79578e-22	GO:0005845//GO:0030027//GO:0043005//GO:0048471	GO:0005515	GO:0048675//GO:0030032
GOAT_ENSBTAP00000022495	142	214	164	827	974	724	7.15216	10.9207	9.40516	37.9192	44.3412	32.7782	173.333	841.667	9.15935	38.3462	2.06577	5.89e-09	3.94e-08	ARHGAP23	sp|Q9P227|RHG23_HUMAN Rho GTPase-activating protein 23 OS=Homo sapiens GN=ARHGAP23 PE=1 SV=2//5.13688e-117	GO:0005737//GO:0015629//GO:0005622	GO:0005543//GO:0005096//GO:0005525//GO:0005515	GO:0043547//GO:0008360//GO:0030900//GO:0007165//GO:0045892//GO:0001843//GO:0007264//GO:0043010//GO:0043116
GOAT_ENSBTAP00000022558	326	215	188	1597	1539	1660	12.0898	8.07849	7.93841	53.9153	51.587	55.3361	243	1598.67	9.36891	53.6128	2.51662	5.01e-17	1.42e-15	GANAB	sp|P79403|GANAB_PIG Neutral alpha-glucosidase AB OS=Sus scrofa GN=GANAB PE=1 SV=1//2.45911e-06	GO:0017177	GO:0030246//GO:0003824//GO:0005515//GO:0004553	GO:0005975
GOAT_ENSBTAP00000022576	1705	1818	1677	964	911	973	477.687	516.062	534.965	245.867	230.694	245.036	1733.33	949.333	509.571	240.532	-1.08305	3.5e-17	1.03e-15	h2afv	sp|Q5BJ65|H2AV_XENTR Histone H2A.V OS=Xenopus tropicalis GN=h2afv PE=2 SV=3//2.49353e-73	GO:0005694//GO:0005634//GO:0000786	GO:0003677	GO:0006334
GOAT_ENSBTAP00000022619	1055	1309	1029	539	487	474	472.924	594.522	525.204	219.954	197.318	190.992	1131	500	530.883	202.755	-1.38866	1.33e-13	2.1e-12	CMC2	sp|Q2NKR3|COXM2_BOVIN COX assembly mitochondrial protein 2 homolog OS=Bos taurus GN=CMC2 PE=3 SV=1//1.25905e-09	GO:0005739	--	--
GOAT_ENSBTAP00000022702	57	45	44	291	222	212	3.41253	2.72963	2.99936	15.8599	12.0131	11.4087	48.6667	241.667	3.04717	13.0939	2.10335	3.62e-07	1.77e-06	ZNF384	sp|Q8TF68|ZN384_HUMAN Zinc finger protein 384 OS=Homo sapiens GN=ZNF384 PE=1 SV=2//8.79016e-13	GO:0005634//GO:0005622	GO:0008270//GO:0003676	--
GOAT_ENSBTAP00000022718	158	192	104	886	770	763	14.4176	17.7512	10.8055	73.5995	63.5077	62.5834	151.333	806.333	14.3247	66.5635	2.21622	2.5e-11	2.57e-10	POR	sp|Q3SYT8|NCPR_BOVIN NADPH--cytochrome P450 reductase OS=Bos taurus GN=POR PE=2 SV=3//0	GO:0005783//GO:0005792//GO:0005625//GO:0016020//GO:0005789//GO:0043231	GO:0003958//GO:0005515//GO:0010181//GO:0005506//GO:0016491	GO:0032770//GO:0090346//GO:0055114
GOAT_ENSBTAP00000022767	28	22	29	177	182	198	1.84921	1.47211	2.18072	10.6416	10.8642	11.7542	26.3333	185.667	1.83402	11.0867	2.59575	7.73e-10	6.04e-09	CLCC1	sp|Q1LZF8|CLCC1_BOVIN Chloride channel CLIC-like protein 1 OS=Bos taurus GN=CLCC1 PE=2 SV=1//0	GO:0005794//GO:0043231//GO:0005634//GO:0016020//GO:0016021//GO:0005783	--	--
GOAT_ENSBTAP00000022801	51	20	15	276	294	356	3.13174	1.24433	1.04877	15.4287	16.3178	19.6501	28.6667	308.667	1.80828	17.1322	3.24402	2.75e-18	9.74e-17	TRIM32	sp|Q13049|TRI32_HUMAN E3 ubiquitin-protein ligase TRIM32 OS=Homo sapiens GN=TRIM32 PE=1 SV=2//0	GO:0005737//GO:0005634//GO:0005863//GO:0005622	GO:0017022//GO:0008270//GO:0031369//GO:0004842//GO:0046872//GO:0005515//GO:0043621//GO:0043130//GO:0003723	GO:0048147//GO:0030307//GO:0009411//GO:0045444//GO:0000209//GO:0045787//GO:0016567//GO:0050769//GO:0045666//GO:0042787//GO:0030335//GO:0034612//GO:0043066//GO:0051092//GO:0045732//GO:2000147//GO:0045862
GOAT_ENSBTAP00000022876	4571	6107	5880	2227	2072	2038	1270.72	1720.11	1861.19	563.591	520.629	509.262	5519.33	2112.33	1617.34	531.161	-1.6064	9.46e-09	6.11e-08	HYPK	sp|Q2PFU1|HYPK_MACFA Huntingtin-interacting protein K OS=Macaca fascicularis GN=HYPK PE=2 SV=1//2.21615e-66
GOAT_ENSBTAP00000022907	861	764	535	5063	4352	4930	34.0053	30.5721	24.0586	182.035	155.357	175.02	720	4781.67	29.5453	170.804	2.53134	7.5e-19	2.92e-17	GABBR1	sp|Q9UBS5|GABR1_HUMAN Gamma-aminobutyric acid type B receptor subunit 1 OS=Homo sapiens GN=GABBR1 PE=1 SV=1//0	GO:0005737//GO:0042734//GO:0016021//GO:0016020//GO:0045211	GO:0004930//GO:0005515//GO:0004965	GO:0007214//GO:0007186
GOAT_ENSBTAP00000022949	7740	10949	7987	3239	3329	3659	2352.27	3371.4	2763.78	896.113	914.45	999.557	8892	3409	2829.15	936.706	-1.5947	3.27e-09	2.29e-08	COX5A	sp|P00426|COX5A_BOVIN Cytochrome c oxidase subunit 5A, mitochondrial OS=Bos taurus GN=COX5A PE=1 SV=2//6.91535e-83	GO:0005743//GO:0016020//GO:0005739	GO:0004129//GO:0046872	--
GOAT_ENSBTAP00000022964	56	42	42	407	433	442	3.73975	2.8418	3.19358	24.7431	26.1362	26.5323	46.6667	427.333	3.25838	25.8038	2.98536	3.12e-18	1.09e-16	ACBD5	sp|P07106|ACBD5_BOVIN Acyl-CoA-binding domain-containing protein 5 OS=Bos taurus GN=ACBD5 PE=2 SV=2//9.13047e-14	GO:0043231	GO:0000062	--
GOAT_ENSBTAP00000022993	1832	2320	1917	849	866	918	534.133	685.332	636.384	225.339	228.213	240.583	2023	877.667	618.616	231.378	-1.41879	2.19e-12	2.73e-11	AAMDC	sp|Q32PA8|AAMDC_BOVIN Mth938 domain-containing protein OS=Bos taurus GN=AAMDC PE=2 SV=1//2.42241e-13	GO:0005737	--	GO:0045600//GO:0043066
GOAT_ENSBTAP00000023068	47	26	22	811	757	740	2.06303	1.1563	1.09952	32.4065	30.0332	29.1969	31.6667	769.333	1.43961	30.5455	4.40721	5.27e-44	5.1e-41	ZC3H11A	sp|O75152|ZC11A_HUMAN Zinc finger CCCH domain-containing protein 11A OS=Homo sapiens GN=ZC3H11A PE=1 SV=3//0	--	GO:0008270//GO:0003676//GO:0005515	--
GOAT_ENSBTAP00000023078	2182	2993	2472	1306	1095	1118	261.705	363.709	337.582	142.595	118.706	120.531	2549	1173	320.999	127.277	-1.33459	1.07e-08	6.85e-08	ERCC1	sp|Q1LZ75|ERCC1_BOVIN DNA excision repair protein ERCC-1 OS=Bos taurus GN=ERCC1 PE=2 SV=1//2.50665e-10	GO:0000109//GO:0000784//GO:0005737//GO:0005634//GO:0005669	GO:0008022//GO:0017025//GO:0003677//GO:0043566//GO:0000014//GO:0003697//GO:0016787//GO:0001094//GO:0019904//GO:0004519//GO:0004518//GO:0005515//GO:0003684	GO:0006295//GO:0006296//GO:0045190//GO:0048468//GO:0008584//GO:0090305//GO:0035264//GO:0009650//GO:0010165//GO:0010259//GO:0006302//GO:0008283//GO:0043066//GO:0048477//GO:0035166//GO:0006281//GO:0006949//GO:0006289//GO:0007281//GO:0007283//GO:0000720//GO:0006979//GO:0006310//GO:0006974//GO:0006312//GO:0001302//GO:0051276//GO:0032205
GOAT_ENSBTAP00000023106	1369	1806	1557	602	570	643	72.0917	96.3582	93.3563	28.8591	27.1304	30.4362	1577.33	605	87.2688	28.8086	-1.59897	4.88e-11	4.77e-10	GALNT8	sp|Q9NY28|GALT8_HUMAN Probable polypeptide N-acetylgalactosaminyltransferase 8 OS=Homo sapiens GN=GALNT8 PE=2 SV=1//1.29224e-11	GO:0016021//GO:0016020//GO:0005794//GO:0008076//GO:0005886//GO:0014704//GO:0045121	GO:0005267//GO:0030246//GO:0019870//GO:0016740//GO:0005251//GO:0005216//GO:0051393//GO:0005249//GO:0019901//GO:0097110//GO:0005515//GO:0016757//GO:0005244//GO:0015271	GO:0042391//GO:0043267//GO:0043266//GO:0034765//GO:0060081//GO:0071435//GO:0071805//GO:0051260//GO:0006813//GO:0006811//GO:0006810//GO:0060372//GO:0019229//GO:0055085
GOAT_ENSBTAP00000023134	74	36	52	377	352	373	3.63528	1.79183	2.90859	16.8598	15.6296	16.4707	54	367.333	2.77857	16.32	2.55423	1.21e-12	1.59e-11	TBK1	sp|Q9UHD2|TBK1_HUMAN Serine/threonine-protein kinase TBK1 OS=Homo sapiens GN=TBK1 PE=1 SV=1//3.31829e-06	GO:0005737	GO:0003676//GO:0005515//GO:0016772//GO:0051219//GO:0000166//GO:0004713//GO:0004672//GO:0005524	GO:0006468//GO:0045359//GO:0050830//GO:0002218//GO:0010629//GO:0045944//GO:0032728//GO:0032727//GO:0043123
GOAT_ENSBTAP00000023151	111	65	37	649	531	538	7.29053	4.32553	2.76701	38.8048	31.5232	31.7626	71	572.667	4.79436	34.0302	2.82741	1.36e-17	4.28e-16	AK5	sp|Q9Y6K8|KAD5_HUMAN Adenylate kinase isoenzyme 5 OS=Homo sapiens GN=AK5 PE=1 SV=2//1.20078e-12	GO:0005737//GO:0005813	GO:0019206//GO:0019205//GO:0016301//GO:0004017//GO:0000166//GO:0016740//GO:0008603//GO:0005524	GO:0006139//GO:0016310//GO:0009165//GO:0007165//GO:0046034
GOAT_ENSBTAP00000023183	12134	13000	11893	6801	6178	6604	3176.23	3447.79	3544.65	1620.64	1461.69	1553.87	12342.3	6527.67	3389.56	1545.4	-1.13312	5.54e-19	2.22e-17	Rpl27	sp|P61354|RL27_RAT 60S ribosomal protein L27 OS=Rattus norvegicus GN=Rpl27 PE=2 SV=2//2.37935e-84	GO:0005840//GO:0022625//GO:0030529//GO:0005622	GO:0003735	GO:0006412
GOAT_ENSBTAP00000023197	26	14	16	197	217	217	1.10474	0.602704	0.774069	7.62005	8.33384	8.2879	18.6667	210.333	0.827171	8.0806	3.2882	9.88e-16	2.22e-14	ADAM9	sp|Q13443|ADAM9_HUMAN Disintegrin and metalloproteinase domain-containing protein 9 OS=Homo sapiens GN=ADAM9 PE=1 SV=1//0	GO:0005737//GO:0009986//GO:0005886//GO:0031233//GO:0005615	GO:0017124//GO:0008270//GO:0008237//GO:0005080//GO:0005178//GO:0004222//GO:0043236//GO:0005515//GO:0005518	GO:0000186//GO:0051384//GO:0051044//GO:0042117//GO:0007160//GO:0010042//GO:0071222//GO:0051088//GO:0030216//GO:0051549//GO:0006509//GO:0006508//GO:0033627//GO:0034241//GO:0034612//GO:0051592//GO:0007155//GO:0007179//GO:0050714//GO:0007229//GO:0042542//GO:0033631//GO:0033630
GOAT_ENSBTAP00000023198	92	75	58	296	308	331	12.6895	10.4811	9.10871	37.1665	38.3977	41.0376	75	311.667	10.7598	38.8673	1.85291	7e-06	2.7e-05	TSPAN17	sp|Q58DN3|TSN17_BOVIN Tetraspanin-17 OS=Bos taurus GN=TSPAN17 PE=2 SV=1//0	GO:0016021//GO:0016020	--	--
GOAT_ENSBTAP00000023201	28	14	7	597	439	375	2.46713	1.24983	0.702273	47.8866	34.9622	29.7005	16.3333	470.333	1.47308	37.5164	4.67061	5.59e-19	2.23e-17	CALCR	sp|P25117|CALCR_PIG Calcitonin receptor OS=Sus scrofa GN=CALCR PE=2 SV=2//9.0849e-10	GO:0016020//GO:0016021//GO:0001669//GO:0005886//GO:0044441	GO:0004930//GO:0004871//GO:0004888//GO:0004872//GO:0004948	GO:0043488//GO:0030316//GO:0007204//GO:0007189//GO:0007165//GO:0007166//GO:0030279//GO:0007186
GOAT_ENSBTAP00000023218	20	9	8	243	213	221	1.40084	0.638691	0.638002	15.4942	13.4846	13.9139	12.3333	225.667	0.892512	14.2976	4.00176	4.84e-22	3.21e-20	GNS	sp|P50426|GNS_CAPHI N-acetylglucosamine-6-sulfatase OS=Capra hircus GN=GNS PE=2 SV=1//0	GO:0005764	GO:0008449//GO:0003824//GO:0005515//GO:0008484	GO:0030203//GO:0008152
GOAT_ENSBTAP00000023245	134	86	84	438	520	397	3.30954	2.15204	2.36219	9.84785	11.6082	8.81355	101.333	451.667	2.60792	10.0899	1.95193	2.13e-07	1.08e-06	LAMC3	sp|Q9Y6N6|LAMC3_HUMAN Laminin subunit gamma-3 OS=Homo sapiens GN=LAMC3 PE=1 SV=3//0	GO:0005604	--	GO:0014002//GO:0000904//GO:0007601//GO:0060041
GOAT_ENSBTAP00000023383	142	174	135	977	1107	863	4.25781	5.28611	4.60898	26.6684	30.0016	23.2598	150.333	982.333	4.71763	26.6433	2.49764	9.89e-16	2.22e-14	PLCG1	sp|P08487|PLCG1_BOVIN 1-phosphatidylinositol 4,5-bisphosphate phosphodiesterase gamma-1 OS=Bos taurus GN=PLCG1 PE=1 SV=1//0	GO:0008180//GO:0001726//GO:0005737//GO:0030027//GO:0005886//GO:0005829//GO:0005622	GO:0005168//GO:0004871//GO:0008081//GO:0005543//GO:0030971//GO:0005509//GO:0035254//GO:0004435//GO:0004629//GO:0005515	GO:0007165//GO:0035556//GO:0009395//GO:0001701//GO:0045766//GO:0050852//GO:0006629//GO:0043536//GO:0010634//GO:0071364
GOAT_ENSBTAP00000023484	22	47	29	276	245	242	4.33491	9.38306	6.50622	49.5076	43.6338	42.8619	32.6667	254.333	6.7414	45.3344	2.74949	1.18e-12	1.55e-11	CDV3	sp|Q9UKY7|CDV3_HUMAN Protein CDV3 homolog OS=Homo sapiens GN=CDV3 PE=1 SV=1//1.57268e-23
GOAT_ENSBTAP00000023642	3030	3765	3334	1733	1754	1913	424.455	534.371	531.775	221	222.084	240.881	3376.33	1800	496.867	227.988	-1.1239	3.33e-10	2.78e-09	HSD17B10	sp|O02691|HCD2_BOVIN 3-hydroxyacyl-CoA dehydrogenase type-2 OS=Bos taurus GN=HSD17B10 PE=1 SV=3//2.7675e-25	GO:0005783//GO:0005739//GO:0005743	GO:0047015//GO:0000166//GO:0005515//GO:0003857//GO:0016491	GO:0008033//GO:0008152//GO:0055114
GOAT_ENSBTAP00000023660	1504	1381	1453	626	521	642	267.009	248.405	293.709	101.171	83.6016	102.45	1446	596.333	269.707	95.7408	-1.49419	2.39e-24	2.3e-22	CCDC153	sp|Q0P5D1|CC153_BOVIN Coiled-coil domain-containing protein 153 OS=Bos taurus GN=CCDC153 PE=2 SV=1//1.43398e-12	GO:0016020	--	GO:0016192
GOAT_ENSBTAP00000023666	54	48	39	227	227	208	7.09349	6.38847	5.83316	27.1454	26.952	24.56	47	220.667	6.43838	26.2191	2.02585	2.3e-06	9.71e-06	PITPNB	sp|P48739|PIPNB_HUMAN Phosphatidylinositol transfer protein beta isoform OS=Homo sapiens GN=PITPNB PE=1 SV=2//7.07357e-47
GOAT_ENSBTAP00000023671	87	90	71	479	515	507	14.2464	14.932	13.2378	71.4044	76.2239	74.6261	82.6667	500.333	14.1387	74.0848	2.38953	3.93e-12	4.69e-11	RAB14	sp|Q5R8Z8|RAB14_PONAB Ras-related protein Rab-14 OS=Pongo abelii GN=RAB14 PE=2 SV=3//1.53159e-07	GO:0055037//GO:0005737//GO:0016020//GO:0045335//GO:0005622//GO:0005634	GO:0000166//GO:0005525//GO:0003924//GO:0019003//GO:0005515	GO:0009790//GO:0007165//GO:0008543//GO:0032880//GO:0006886//GO:0032456//GO:0006913//GO:0006184//GO:0007264//GO:0006895//GO:0015031
GOAT_ENSBTAP00000023708	30	16	28	405	422	403	1.2823	0.692909	1.36269	15.7589	16.3034	15.4835	24.6667	410	1.11263	15.8486	3.83231	3.77e-28	5.56e-26	RNF19A	sp|Q9NV58|RN19A_HUMAN E3 ubiquitin-protein ligase RNF19A OS=Homo sapiens GN=RNF19A PE=1 SV=3//0	--	GO:0046872//GO:0008270//GO:0005515	--
GOAT_ENSBTAP00000023734	719	359	311	2478	2437	2919	125.778	63.6295	61.9454	394.622	385.327	458.994	463	2611.33	83.7842	412.981	2.30133	3.15e-14	5.52e-13	ITM2C	sp|A2VDN0|ITM2C_BOVIN Integral membrane protein 2C OS=Bos taurus GN=ITM2C PE=2 SV=1//7.92184e-128	GO:0005794//GO:0016021//GO:0016020//GO:0005764//GO:0005765//GO:0005886//GO:0048471	GO:0001540//GO:0005515//GO:0005524	GO:0030182//GO:0012502//GO:0010977
GOAT_ENSBTAP00000023735	528	548	450	232	210	226	259.382	272.757	251.705	103.753	93.2448	99.7959	508.667	222.667	261.281	98.9311	-1.40111	4.43e-20	2.1e-18	TSTD1	sp|Q8NFU3|TSTD1_HUMAN Thiosulfate sulfurtransferase/rhodanese-like domain-containing protein 1 OS=Homo sapiens GN=TSTD1 PE=1 SV=3//6.14121e-37	GO:0005737//GO:0005739	--	--
GOAT_ENSBTAP00000023803	8	5	8	124	137	130	0.370662	0.234718	0.422038	5.23015	5.7373	5.41414	7	130.333	0.342473	5.46053	3.99498	6.3e-16	1.48e-14	COG3	sp|Q96JB2|COG3_HUMAN Conserved oligomeric Golgi complex subunit 3 OS=Homo sapiens GN=COG3 PE=1 SV=3//0	GO:0005737//GO:0005794//GO:0017119//GO:0005801//GO:0016020//GO:0005886//GO:0005634	GO:0005515//GO:0008565	GO:0006891//GO:0006890//GO:0006888//GO:0006486//GO:0006886//GO:0050821//GO:0033365//GO:0015031
GOAT_ENSBTAP00000023877	98	96	57	321	384	419	3.14069	3.11716	2.07992	9.36502	11.1232	12.0701	83.6667	374.667	2.77926	10.8528	1.96529	4.35e-07	2.09e-06	AHI1	sp|Q8N157|AHI1_HUMAN Jouberin OS=Homo sapiens GN=AHI1 PE=1 SV=1//8.6207e-07	GO:0005929//GO:0031513//GO:0072372//GO:0005813//GO:0005814//GO:0005911//GO:0005932//GO:0005912	GO:0005515	GO:0010842//GO:0070986//GO:0007169//GO:0007417//GO:0001947//GO:0071599//GO:0065001//GO:0043066//GO:0042384//GO:0060271//GO:0070121//GO:0034613//GO:0050795//GO:0001738//GO:0002092//GO:0039023//GO:0016192//GO:0030862//GO:0039008//GO:0035844//GO:0035845//GO:0045944//GO:0030902//GO:0033365
GOAT_ENSBTAP00000023881	62	55	47	264	262	254	2.08185	1.87115	1.79692	8.06987	7.95167	7.66636	54.6667	260	1.91664	7.89597	2.04254	6.4e-07	2.98e-06	Srgap2	sp|Q91Z67|SRGP2_MOUSE SLIT-ROBO Rho GTPase-activating protein 2 OS=Mus musculus GN=Srgap2 PE=1 SV=2//0	GO:0005743//GO:0005829//GO:0045211//GO:0005622//GO:0045335//GO:0014069//GO:0005886	GO:0030675//GO:0048365//GO:0005515//GO:0042803	GO:0021816//GO:0032855//GO:0048812//GO:0007165//GO:0046847//GO:0060996
GOAT_ENSBTAP00000023908	378	167	206	1703	1698	1774	84.7229	37.924	52.5714	347.479	343.99	357.405	250.333	1725	58.4061	349.625	2.58162	3.08e-18	1.08e-16	PTGES3	sp|Q5NVM4|TEBP_PONAB Prostaglandin E synthase 3 OS=Pongo abelii GN=PTGES3 PE=2 SV=1//2.93347e-105	GO:0005737//GO:0005697//GO:0005634	GO:0050220//GO:0016853//GO:0051082//GO:0005515//GO:0003720	GO:0006633//GO:0001516//GO:0070389//GO:0008610
GOAT_ENSBTAP00000023920	53	56	62	252	252	260	1.59854	1.71129	2.12918	6.91915	6.86984	7.04885	57	254.667	1.813	6.94595	1.93779	2.9e-06	1.2e-05	ABL1	sp|P00519|ABL1_HUMAN Tyrosine-protein kinase ABL1 OS=Homo sapiens GN=ABL1 PE=1 SV=4//0	GO:0005737//GO:0005730//GO:0005634//GO:0048471//GO:0031252	GO:0008022//GO:0051019//GO:0070064//GO:0000287//GO:0000166//GO:0016740//GO:0004715//GO:0004713//GO:0004672//GO:0005524//GO:0016301//GO:0030145//GO:0019905//GO:0017124//GO:0016772//GO:0005515//GO:0019904	GO:0016310//GO:0018108//GO:0048008//GO:0071901//GO:0043065//GO:0006468//GO:0006974//GO:0006975//GO:0030036//GO:2001020//GO:0042770//GO:0051726//GO:0050731//GO:0051353
GOAT_ENSBTAP00000024007	39	37	37	439	584	544	3.9067	3.75523	4.22008	40.0327	52.8759	48.9827	37.6667	522.333	3.96067	47.2971	3.57793	1.58e-27	2.22e-25	PIP4K2A	sp|P48426|PI42A_HUMAN Phosphatidylinositol 5-phosphate 4-kinase type-2 alpha OS=Homo sapiens GN=PIP4K2A PE=1 SV=2//1.00779e-64	--	GO:0016307	GO:0035855//GO:0046488//GO:0046854
GOAT_ENSBTAP00000024009	24	21	22	236	234	237	3.00936	2.66791	3.14093	26.9389	26.5203	26.7122	22.3333	235.667	2.9394	26.7238	3.18453	6.53e-16	1.52e-14	Cnot7	sp|Q60809|CNOT7_MOUSE CCR4-NOT transcription complex subunit 7 OS=Mus musculus GN=Cnot7 PE=1 SV=1//0	GO:0000932//GO:0030014//GO:0005737//GO:0005634	GO:0004532//GO:0005515//GO:0004535//GO:0003676//GO:0000175	GO:0008284//GO:0008285//GO:0000290//GO:0033962//GO:0031047//GO:0006355//GO:0060213//GO:0045944//GO:0006351//GO:0043928//GO:0000289
GOAT_ENSBTAP00000024046	214	224	154	1097	1285	1270	4.11715	4.36637	3.37347	19.213	22.3453	21.9627	197.333	1217.33	3.95233	21.1736	2.42149	4.49e-15	9.05e-14	PTPRF	sp|A7MBJ4|PTPRF_BOVIN Receptor-type tyrosine-protein phosphatase F OS=Bos taurus GN=PTPRF PE=2 SV=1//4.58018e-08	GO:0016021//GO:0016020	GO:0016787//GO:0016791//GO:0004721//GO:0008201//GO:0004872//GO:0005515//GO:0004725	GO:0016311//GO:0006470//GO:0007155//GO:0035335
GOAT_ENSBTAP00000024047	3726	4119	3288	2954	2719	2628	274.939	307.945	276.247	198.43	181.343	174.307	3711	2767	286.377	184.694	-0.632782	8.45e-11	7.85e-10	WDR13	sp|Q5RF24|WDR13_PONAB WD repeat-containing protein 13 OS=Pongo abelii GN=WDR13 PE=2 SV=1//4.87183e-12	GO:0005737//GO:0005634	GO:0005515	--
GOAT_ENSBTAP00000024107	1625	960	996	5216	6370	5957	311.631	186.53	217.48	910.605	1104.14	1026.86	1193.67	5847.67	238.547	1013.87	2.08753	7.32e-12	8.32e-11	PEBP1	sp|P13696|PEBP1_BOVIN Phosphatidylethanolamine-binding protein 1 OS=Bos taurus GN=PEBP1 PE=1 SV=2//3.14181e-41	GO:0005737	GO:0008289//GO:0000166//GO:0030414//GO:0004867//GO:0005524	GO:0010466
GOAT_ENSBTAP00000024133	47	49	28	285	372	366	2.0234	2.13732	1.37251	11.1695	14.4752	14.1633	41.3333	341	1.84441	13.2693	2.84686	3.94e-15	8.08e-14	Vps53	sp|Q8CCB4|VPS53_MOUSE Vacuolar protein sorting-associated protein 53 homolog OS=Mus musculus GN=Vps53 PE=2 SV=1//0	GO:0000938	GO:0005515	--
GOAT_ENSBTAP00000024134	219	435	226	1499	1561	1724	4.26367	8.5806	5.00981	26.5672	27.4689	30.17	293.333	1594.67	5.95136	28.0687	2.23767	4.68e-11	4.59e-10	MAP2	sp|P11137|MAP2_HUMAN Microtubule-associated protein 2 OS=Homo sapiens GN=MAP2 PE=1 SV=4//0	GO:0005737//GO:0043005//GO:0044297//GO:0030425//GO:0043198//GO:0043025//GO:0005622//GO:0005874//GO:0034399	GO:0015631//GO:0008017//GO:0005515//GO:0002162	GO:0018107//GO:0001578//GO:0071310//GO:0016358//GO:0048813//GO:0007409//GO:0031175//GO:0021954
GOAT_ENSBTAP00000024154	137	94	84	735	1059	1231	14.3656	9.98665	10.029	70.1609	100.369	116.027	105	1008.33	11.4604	95.5188	3.05913	4.6e-09	3.14e-08	VAT1L	sp|Q9HCJ6|VAT1L_HUMAN Synaptic vesicle membrane protein VAT-1 homolog-like OS=Homo sapiens GN=VAT1L PE=1 SV=2//0	--	GO:0016747//GO:0016491//GO:0008270//GO:0000166	GO:0055114
GOAT_ENSBTAP00000024191	162	77	83	635	658	582	12.853	6.18971	7.49794	45.8637	47.1863	41.5061	107.333	625	8.8469	44.852	2.34193	3.89e-12	4.64e-11	narf	sp|Q6GP25|NARF_XENLA Nuclear prelamin A recognition factor OS=Xenopus laevis GN=narf PE=2 SV=1//3.04808e-18	GO:0031981//GO:0005638	GO:0005521	--
GOAT_ENSBTAP00000024209	2450	2672	2577	1152	1084	1224	1273.34	1407.04	1524.99	545.051	509.223	571.82	2566.33	1153.33	1401.79	542.031	-1.37082	8.84e-18	2.88e-16	NDUFC2	sp|Q02827|NDUC2_BOVIN NADH dehydrogenase [ubiquinone] 1 subunit C2 OS=Bos taurus GN=NDUFC2 PE=1 SV=1//1.2946e-39	GO:0016021//GO:0016020//GO:0005739//GO:0005743//GO:0070469	GO:0008137	GO:0006120//GO:0022900
GOAT_ENSBTAP00000024297	33	14	17	364	395	319	6.46684	2.77968	3.79315	64.9358	69.9639	56.191	21.3333	359.333	4.34656	63.6969	3.87328	1.04e-26	1.29e-24	CDKN1B	sp|O19001|CDN1B_FELCA Cyclin-dependent kinase inhibitor 1B OS=Felis catus GN=CDKN1B PE=2 SV=1//9.7772e-17	GO:0005737//GO:0005634//GO:0005829	GO:0004861//GO:0019903//GO:0004693//GO:0008656//GO:0005515	GO:0033673//GO:0030308//GO:0045930//GO:0000082//GO:0050680//GO:0048102//GO:0010942//GO:0060770//GO:0007049//GO:0031116//GO:0006813//GO:0043066//GO:0008284//GO:0008285//GO:0071236//GO:0006919//GO:0007605//GO:0006917//GO:0051271//GO:0007050//GO:0045892//GO:0071850//GO:0048839//GO:0042326//GO:0071285//GO:0071407//GO:0045732//GO:0045736
GOAT_ENSBTAP00000024313	80	33	48	674	718	660	4.57564	1.91234	3.12591	35.0935	37.118	33.9315	53.6667	684	3.20463	35.381	3.46475	3.42e-28	5.12e-26	WAC	sp|Q9BTA9|WAC_HUMAN WW domain-containing adapter protein with coiled-coil OS=Homo sapiens GN=WAC PE=1 SV=3//6.77824e-12	GO:0005681	GO:0000993//GO:0005515//GO:0003682	GO:0016239//GO:0000075//GO:0032435//GO:0010390//GO:0006974//GO:0045893//GO:0071894
GOAT_ENSBTAP00000024326	8710	9721	8599	4634	4282	4777	1459.6	1650.5	1640.73	706.929	648.576	719.562	9010	4564.33	1583.61	691.689	-1.19502	8.73e-19	3.33e-17	ATP5O	sp|P13621|ATPO_BOVIN ATP synthase subunit O, mitochondrial OS=Bos taurus GN=ATP5O PE=1 SV=2//2.2591e-150	GO:0016020//GO:0005743//GO:0005753//GO:0005739//GO:0005886	GO:0046933//GO:0008144//GO:0016887	GO:0015986//GO:0015992//GO:0006811//GO:0006810//GO:0006200//GO:0042776//GO:0006754
GOAT_ENSBTAP00000024333	578	598	694	254	248	193	177.162	185.709	242.201	70.8731	68.7059	53.1739	623.333	231.667	201.691	64.251	-1.65036	4.13e-11	4.09e-10	VAMP5	sp|Q2KHY2|VAMP5_BOVIN Vesicle-associated membrane protein 5 OS=Bos taurus GN=VAMP5 PE=3 SV=1//1.06514e-22	GO:0005794//GO:0016020//GO:0016021//GO:0012505//GO:0005887//GO:0005886	--	GO:0007517//GO:0016192//GO:0030154//GO:0007519//GO:0043001//GO:0007275
GOAT_ENSBTAP00000024335	2408	2483	2263	1662	1542	1654	223.717	233.726	239.386	140.565	129.487	138.126	2384.67	1619.33	232.276	136.059	-0.771608	1.53e-12	1.97e-11	ACAA1	sp|P09110|THIK_HUMAN 3-ketoacyl-CoA thiolase, peroxisomal OS=Homo sapiens GN=ACAA1 PE=1 SV=2//3.26616e-07	GO:0043231//GO:0005777	GO:0005515//GO:0003824//GO:0016740//GO:0016746//GO:0016747//GO:0016401	GO:0006635//GO:0008152//GO:0000038//GO:0008206
GOAT_ENSBTAP00000024391	1552	1980	1817	852	862	686	496.939	642.341	662.429	248.345	249.469	197.439	1783	800	600.569	231.751	-1.37375	6.83e-10	5.42e-09	CLEC3B	sp|Q2KIS7|TETN_BOVIN Tetranectin OS=Bos taurus GN=CLEC3B PE=2 SV=1//9.21639e-11	GO:0005737//GO:0005615//GO:0001652//GO:0005576	GO:0005509//GO:0008201//GO:0030246//GO:0019904	GO:0001501//GO:0071560//GO:0071310//GO:0001503//GO:0010756//GO:0030282
GOAT_ENSBTAP00000024427	65	22	40	277	273	210	9.55328	3.27605	6.6938	37.0616	36.2661	27.7432	42.3333	253.333	6.50771	33.6903	2.37211	2.37e-09	1.7e-08	TMEM109	sp|O77751|TM109_RABIT Transmembrane protein 109 OS=Oryctolagus cuniculus GN=TMEM109 PE=1 SV=1//4.88985e-78	GO:0005737//GO:0005634//GO:0031965//GO:0016021	--	GO:0042771
GOAT_ENSBTAP00000024448	275	291	208	3251	4212	3522	17.211	18.4526	14.8221	185.224	238.266	198.135	258	3661.67	16.8286	207.208	3.6221	6.78e-35	2.48e-32	DPYSL2	sp|O02675|DPYL2_BOVIN Dihydropyrimidinase-related protein 2 OS=Bos taurus GN=DPYSL2 PE=1 SV=1//0	GO:0005737//GO:0005739//GO:0030424//GO:0030425//GO:0043025	GO:0016787//GO:0016812//GO:0016810//GO:0019901//GO:0005515	GO:0007010//GO:0006208//GO:0007399//GO:0030154//GO:0007275
GOAT_ENSBTAP00000024457	25	8	9	193	199	227	2.2302	0.723073	0.914153	15.6735	16.0456	18.2023	14	206.333	1.28914	16.6405	3.69021	1.45e-18	5.35e-17	CRLF3	sp|Q8IUI8|CRLF3_HUMAN Cytokine receptor-like factor 3 OS=Homo sapiens GN=CRLF3 PE=1 SV=2//0	GO:0005737	GO:0005515	GO:0046427//GO:0030308//GO:0071158//GO:0045944//GO:0045893//GO:0045749
GOAT_ENSBTAP00000024524	103	65	42	542	613	651	5.05992	3.23526	2.34925	24.2388	27.2186	28.7465	70	602	3.54814	26.7346	2.91357	3.97e-19	1.61e-17	SLC6A15	sp|Q9XS59|S6A15_BOVIN Sodium-dependent neutral amino acid transporter B(0)AT2 OS=Bos taurus GN=SLC6A15 PE=2 SV=1//1.4175e-11	GO:0016020//GO:0005887//GO:0016021	GO:0005328//GO:0015293//GO:0005298	GO:0006810//GO:0006811//GO:0006865//GO:0006814//GO:0015804//GO:0015820//GO:0015824//GO:0006836
GOAT_ENSBTAP00000024600	3664	4349	3242	1999	2056	2209	568.817	684.062	573.064	282.511	288.496	308.255	3751.67	2088	608.648	293.087	-1.05428	5.36e-13	7.48e-12	NDUFS3	sp|P23709|NDUS3_BOVIN NADH dehydrogenase [ubiquinone] iron-sulfur protein 3, mitochondrial OS=Bos taurus GN=NDUFS3 PE=1 SV=1//5.96249e-167	GO:0005739//GO:0031966//GO:0005743//GO:0005747	GO:0016651//GO:0005515//GO:0008137//GO:0016491//GO:0003954	GO:0030308//GO:0006917//GO:0072593//GO:0055114
GOAT_ENSBTAP00000024621	1220	1293	1027	686	700	713	165.724	177.956	158.843	84.8309	85.9453	87.0588	1180	699.667	167.508	85.945	-0.962742	5.54e-15	1.1e-13	PQBP1	sp|Q2HJC9|PQBP1_BOVIN Polyglutamine-binding protein 1 OS=Bos taurus GN=PQBP1 PE=2 SV=1//1.11346e-23	GO:0005737//GO:0010494//GO:0005634//GO:0071598	GO:0005515	GO:0034063//GO:0006355//GO:0006351
GOAT_ENSBTAP00000024660	69	58	28	278	256	249	14.0594	11.9738	6.49602	51.5663	47.1471	45.6051	51.6667	261	10.8431	48.1062	2.14945	1.57e-07	8.11e-07	HDGFRP3	sp|Q9Y3E1|HDGR3_HUMAN Hepatoma-derived growth factor-related protein 3 OS=Homo sapiens GN=HDGFRP3 PE=1 SV=1//2.26671e-84	GO:0005737//GO:0005634	--	--
GOAT_ENSBTAP00000024788	6907	6371	5637	4723	4266	4144	1457.03	1361.69	1353.95	906.991	813.392	785.774	6305	4377.67	1390.89	835.386	-0.735492	1.98e-12	2.48e-11	RPL29	sp|Q58DW3|RL29_BOVIN 60S ribosomal protein L29 OS=Bos taurus GN=RPL29 PE=2 SV=3//1.17576e-79	GO:0005840//GO:0022625//GO:0030529//GO:0005622	GO:0003735	GO:0006412
GOAT_ENSBTAP00000024812	645	460	341	2685	3006	3340	44.0585	31.8359	26.5215	166.962	185.591	205.076	482	3010.33	34.1386	185.876	2.44487	7.71e-17	2.1e-15	ATP6V1B2	sp|P31408|VATB2_BOVIN V-type proton ATPase subunit B, brain isoform OS=Bos taurus GN=ATP6V1B2 PE=1 SV=3//0	GO:0005902//GO:0005737//GO:0016020//GO:0033180//GO:0005794//GO:0012505//GO:0005886//GO:0042470//GO:0043231//GO:0005829//GO:0033178//GO:0016469	GO:0016787//GO:0016820//GO:0005524//GO:0046961//GO:0046933	GO:0015992//GO:0015991//GO:0046034//GO:0006811//GO:0006810
GOAT_ENSBTAP00000024880	17	10	8	215	213	230	0.945188	0.563324	0.506445	10.8821	10.704	11.4946	11.6667	219.333	0.671653	11.0269	4.03717	5.11e-22	3.38e-20	ACSS3	sp|A7MB45|ACSS3_BOVIN Acyl-CoA synthetase short-chain family member 3, mitochondrial OS=Bos taurus GN=ACSS3 PE=2 SV=1//0	GO:0005739	GO:0003824	GO:0008152
GOAT_ENSBTAP00000024883	35	19	27	302	281	248	1.37476	0.756138	1.20752	10.7987	9.97616	8.75604	27	277	1.11281	9.84362	3.14499	8.48e-17	2.3e-15	WDR44	sp|Q9XSC3|WDR44_BOVIN WD repeat-containing protein 44 OS=Bos taurus GN=WDR44 PE=1 SV=1//8.40135e-11	--	GO:0005515	--
GOAT_ENSBTAP00000024887	37	19	7	508	488	505	2.123	1.10457	0.45732	26.5349	25.3086	26.0458	21	500.333	1.2283	25.9631	4.40173	3.74e-37	1.76e-34	Kat7	sp|Q5SVQ0|KAT7_MOUSE Histone acetyltransferase KAT7 OS=Mus musculus GN=Kat7 PE=2 SV=1//6.06915e-27	GO:0000123//GO:0005634//GO:0005622//GO:0005654	GO:0016740//GO:0008270//GO:0005515//GO:0003700//GO:0016747	GO:0043966//GO:0043982//GO:0043983//GO:0043981//GO:0006355//GO:0006260
GOAT_ENSBTAP00000024928	55	90	64	465	525	484	2.83796	4.70518	3.76008	21.8425	24.4851	22.4485	69.6667	491.333	3.76774	22.9254	2.60517	1.29e-14	2.4e-13	GOLIM4	sp|O00461|GOLI4_HUMAN Golgi integral membrane protein 4 OS=Homo sapiens GN=GOLIM4 PE=1 SV=1//0	GO:0005794//GO:0005634	--	--
GOAT_ENSBTAP00000024993	18	17	9	152	166	186	1.95017	1.86612	1.11024	14.9916	16.2558	18.1139	14.6667	168	1.64218	16.4538	3.32474	4.68e-14	7.97e-13	HSDL1	sp|A5PJF6|HSDL1_BOVIN Inactive hydroxysteroid dehydrogenase-like protein 1 OS=Bos taurus GN=HSDL1 PE=2 SV=1//2.61513e-11	GO:0005739	GO:0016491//GO:0000166	GO:0055114//GO:0008152
GOAT_ENSBTAP00000025031	2299	2392	1986	1570	1609	1866	318.323	335.567	313.099	197.894	201.365	232.241	2225.67	1681.67	322.33	210.5	-0.614716	2.22e-10	1.91e-09	SNF8	sp|Q96H20|SNF8_HUMAN Vacuolar-sorting protein SNF8 OS=Homo sapiens GN=SNF8 PE=1 SV=1//1.62466e-176	GO:0005667	GO:0008134	GO:0006357
GOAT_ENSBTAP00000025042	3004	3824	3297	2218	2165	1986	178.358	230.038	222.887	119.883	116.185	105.991	3375	2123	210.427	114.02	-0.88404	3.47e-08	2.02e-07	Nop56	sp|Q9D6Z1|NOP56_MOUSE Nucleolar protein 56 OS=Mus musculus GN=Nop56 PE=1 SV=2//7.91165e-12
GOAT_ENSBTAP00000025095	50	35	43	306	348	286	4.16995	2.95745	4.08322	23.232	26.2325	21.44	42.6667	313.333	3.73687	23.6348	2.66101	5.49e-13	7.63e-12	FBXL3	sp|Q9UKT7|FBXL3_HUMAN F-box/LRR-repeat protein 3 OS=Homo sapiens GN=FBXL3 PE=1 SV=1//1.82584e-16	GO:0005634//GO:0019005//GO:0005829	GO:0005515//GO:0004842	GO:0043161//GO:0031146//GO:0016567//GO:0042752//GO:0043153
GOAT_ENSBTAP00000025111	44	41	31	278	304	252	9.01662	8.51264	7.23312	51.861	56.3072	46.4183	38.6667	278	8.25413	51.5288	2.64219	4.55e-12	5.35e-11	EIF4E3	sp|Q8N5X7|IF4E3_HUMAN Eukaryotic translation initiation factor 4E type 3 OS=Homo sapiens GN=EIF4E3 PE=2 SV=4//1.02237e-106	GO:0005737	GO:0003743//GO:0003723	GO:0006413//GO:0006412
GOAT_ENSBTAP00000025168	3474	4403	3612	1998	1927	1945	231.137	296.81	273.628	121.015	115.883	116.321	3829.67	1956.67	267.192	117.74	-1.18227	8e-11	7.46e-10	DALRD3	sp|Q5D0E6|DALD3_HUMAN DALR anticodon-binding domain-containing protein 3 OS=Homo sapiens GN=DALRD3 PE=2 SV=2//0
GOAT_ENSBTAP00000025174	962	1011	824	640	593	607	210.359	223.988	205.157	127.4	117.203	119.309	932.333	613.333	213.168	121.304	-0.813364	1.69e-12	2.15e-11	NDUFAF3	sp|Q2HJI2|NDUF3_BOVIN NADH dehydrogenase [ubiquinone] 1 alpha subcomplex assembly factor 3 OS=Bos taurus GN=NDUFAF3 PE=2 SV=1//1.26206e-27	GO:0005634//GO:0016020//GO:0005739//GO:0005743	GO:0005515	GO:0032981
GOAT_ENSBTAP00000025201	89	56	30	446	533	399	5.36416	3.41971	2.05876	24.471	29.0361	21.6164	58.3333	459.333	3.61421	25.0412	2.79255	2.15e-15	4.61e-14	LSS	sp|P84466|ERG7_BOVIN Lanosterol synthase OS=Bos taurus GN=LSS PE=1 SV=2//1.3527e-08	GO:0005811	GO:0003824//GO:0016866	GO:0006695
GOAT_ENSBTAP00000025313	867	963	938	378	289	388	478.338	538.308	589.239	189.851	144.116	192.418	922.667	351.667	535.295	175.462	-1.60918	2.93e-17	8.8e-16	IFITM1	sp|P13164|IFM1_HUMAN Interferon-induced transmembrane protein 1 OS=Homo sapiens GN=IFITM1 PE=1 SV=3//2.88747e-10	GO:0016021	--	GO:0009607
GOAT_ENSBTAP00000025318	2845	3588	2793	1716	1723	1924	283.406	362.133	316.789	155.614	155.135	172.278	3075.33	1787.67	320.776	161.009	-0.994425	8.29e-10	6.46e-09	NANS	sp|Q9NR45|SIAS_HUMAN Sialic acid synthase OS=Homo sapiens GN=NANS PE=1 SV=2//0	GO:0005829	GO:0003824//GO:0047444	GO:0016051
GOAT_ENSBTAP00000025321	38	25	22	253	284	280	4.12951	2.75261	2.72214	25.0288	27.8954	27.3509	28.3333	272.333	3.20142	26.7584	3.06321	8.9e-16	2.02e-14	Extl2	sp|Q9ES89|EXTL2_MOUSE Exostosin-like 2 OS=Mus musculus GN=Extl2 PE=1 SV=1//0	GO:0005783//GO:0031227	GO:0001888//GO:0016758//GO:0035248	GO:0006044//GO:0019276
GOAT_ENSBTAP00000025322	3560	4146	3426	1749	1811	1882	899.064	1060.86	985.148	402.101	413.388	427.227	3710.67	1814	981.691	414.239	-1.24481	7.45e-17	2.03e-15	NDUFA11	sp|Q8HXG6|NDUAB_BOVIN NADH dehydrogenase [ubiquinone] 1 alpha subcomplex subunit 11 OS=Bos taurus GN=NDUFA11 PE=1 SV=3//3.51428e-94	GO:0016021//GO:0016020//GO:0005739//GO:0005743//GO:0070469	--	GO:0022900
GOAT_ENSBTAP00000025329	4	7	3	103	132	121	0.18825	0.333781	0.160757	4.41282	5.61496	5.11867	4.66667	118.667	0.227596	5.04882	4.4714	4.88e-17	1.38e-15	LPPR4	sp|Q7Z2D5|LPPR4_HUMAN Lipid phosphate phosphatase-related protein type 4 OS=Homo sapiens GN=LPPR4 PE=1 SV=1//1.26964e-28	GO:0016020	GO:0003824//GO:0005515	GO:0048839//GO:0008152
GOAT_ENSBTAP00000025341	128	85	99	449	461	455	14.1675	9.53218	12.4765	45.2413	46.1194	45.2682	104	455	12.0587	45.543	1.91715	3.38e-07	1.66e-06	AQP4	sp|O77750|AQP4_BOVIN Aquaporin-4 OS=Bos taurus GN=AQP4 PE=2 SV=3//0	GO:0005737//GO:0016020//GO:0009897//GO:0016021//GO:0016323//GO:0005911//GO:0005886	GO:0015250//GO:0005215	GO:0071346//GO:0007605//GO:0006810//GO:0050891//GO:0070295//GO:0006833//GO:0030104//GO:0055085
GOAT_ENSBTAP00000025374	233	52	145	1646	2077	1468	48.2991	10.9213	34.2235	310.612	389.151	273.531	143.333	1730.33	31.148	324.431	3.3807	9.51e-17	2.55e-15	CLDN11	sp|Q5REK8|CLD11_PONAB Claudin-11 OS=Pongo abelii GN=CLDN11 PE=2 SV=1//8.92519e-11	GO:0016328//GO:0016021//GO:0016020//GO:0005886//GO:0005923//GO:0030054	GO:0005198//GO:0005515	GO:0007283//GO:0008366//GO:0007155
GOAT_ENSBTAP00000025380	17	18	13	138	160	172	0.883545	0.947854	0.769301	6.52926	7.51621	8.03538	16	156.667	0.8669	7.36028	3.08582	4.75e-12	5.57e-11	FCHSD2	sp|O94868|FCSD2_HUMAN FCH and double SH3 domains protein 2 OS=Homo sapiens GN=FCHSD2 PE=1 SV=3//1.66847e-21	--	GO:0005515	--
GOAT_ENSBTAP00000025432	12	10	12	275	332	254	2.96785	2.50582	3.37921	61.9154	74.2161	56.4667	11.3333	287	2.95096	64.1994	4.4433	2.02e-29	3.57e-27	CAV2	sp|Q09YJ1|CAV2_SHEEP Caveolin-2 OS=Ovis aries GN=CAV2 PE=3 SV=1//2.91506e-14
GOAT_ENSBTAP00000025446	79	82	46	335	348	419	11.8538	12.4662	7.85891	45.7594	47.1965	56.5123	69	367.333	10.7263	49.8227	2.21565	3.2e-09	2.24e-08	CDC42EP4	sp|Q9H3Q1|BORG4_HUMAN Cdc42 effector protein 4 OS=Homo sapiens GN=CDC42EP4 PE=1 SV=1//2.21106e-94	GO:0005737//GO:0015630//GO:0015629	GO:0005515	GO:0031274//GO:0008360//GO:0007266
GOAT_ENSBTAP00000025456	14	8	7	184	163	198	0.950874	0.550521	0.541335	11.3767	10.0065	12.0881	9.66667	181.667	0.68091	11.1571	4.03435	1.05e-19	4.7e-18	SLC1A1	sp|Q95135|EAA3_BOVIN Excitatory amino acid transporter 3 OS=Bos taurus GN=SLC1A1 PE=2 SV=1//9.75014e-10	GO:0016020//GO:0005886	GO:0005313//GO:0015501//GO:0017153	GO:0051938//GO:0070779//GO:0015813//GO:0051260//GO:0006835
GOAT_ENSBTAP00000025468	67	31	22	453	354	348	4.702	2.20424	1.75794	28.9408	22.4549	21.9526	40	385	2.88806	24.4494	3.08163	3.08e-18	1.08e-16	DMP1	sp|Q95120|DMP1_BOVIN Dentin matrix acidic phosphoprotein 1 OS=Bos taurus GN=DMP1 PE=2 SV=1//0	GO:0043231//GO:0005730//GO:0005634	GO:0050840	GO:0010811//GO:0001503//GO:0030198
GOAT_ENSBTAP00000025475	117	173	61	779	984	989	5.29105	7.92668	3.14093	32.0699	40.2207	40.2022	117	917.333	5.45289	37.4976	2.78171	1.32e-14	2.45e-13	KIF3C	sp|A0JN40|KIF3C_BOVIN Kinesin-like protein KIF3C OS=Bos taurus GN=KIF3C PE=2 SV=1//0	GO:0005737//GO:0005856//GO:0005874	GO:0000166//GO:0003777//GO:0005524	GO:0007018
GOAT_ENSBTAP00000025484	8747	10333	10582	3828	3285	3885	2469.93	2956.25	3402.25	984.016	838.416	986.085	9887.33	3666	2942.81	936.172	-1.65235	1.85e-11	1.95e-10	Rps20	sp|P60868|RS20_RAT 40S ribosomal protein S20 OS=Rattus norvegicus GN=Rps20 PE=3 SV=1//7.20025e-10	GO:0005737//GO:0005840//GO:0030529//GO:0005622//GO:0022627//GO:0015935	GO:0003735//GO:0003723	GO:0006412
GOAT_ENSBTAP00000025510	331	360	326	1243	1374	1402	9.75363	10.7481	10.9378	33.3437	36.5952	37.1351	339	1339.67	10.4798	35.6913	1.76796	3.28e-07	1.62e-06	INPPL1	sp|O15357|SHIP2_HUMAN Phosphatidylinositol 3,4,5-trisphosphate 5-phosphatase 2 OS=Homo sapiens GN=INPPL1 PE=1 SV=2//0	GO:0005737//GO:0005886//GO:0005794	GO:0042169//GO:0005515	GO:0008285//GO:0006897//GO:0006661//GO:0097178//GO:0007015//GO:0009791//GO:0010629//GO:0046854//GO:0032868//GO:0006006//GO:0044255
GOAT_ENSBTAP00000025561	388	422	259	165	99	66	136.415	150.325	103.682	52.8102	31.4603	20.8579	356.333	110	130.14	35.0428	-1.89288	3.08e-14	5.4e-13	S100A4	sp|P35466|S10A4_BOVIN Protein S100-A4 OS=Bos taurus GN=S100A4 PE=1 SV=2//2.69742e-68	GO:0005634//GO:0048471	GO:0050786//GO:0005509//GO:0005515//GO:0042802	GO:0043542//GO:0043123
GOAT_ENSBTAP00000025586	3936	4713	3638	2318	2635	2527	334.481	405.792	352.008	179.323	202.393	193.028	4095.67	2493.33	364.094	191.581	-0.926353	1.18e-11	1.3e-10	TUFM	sp|P49410|EFTU_BOVIN Elongation factor Tu, mitochondrial OS=Bos taurus GN=TUFM PE=1 SV=1//0	GO:0042645//GO:0005739//GO:0005622//GO:0005743	GO:0000166//GO:0003924//GO:0003746//GO:0005525	GO:0006184//GO:0006414//GO:0006412
GOAT_ENSBTAP00000025590	53	60	43	371	421	408	1.06959	1.22682	0.98806	6.81585	7.67932	7.40116	52	400	1.09482	7.29878	2.73696	5.51e-15	1.09e-13	KIF13A	sp|Q9H1H9|KI13A_HUMAN Kinesin-like protein KIF13A OS=Homo sapiens GN=KIF13A PE=1 SV=2//0	GO:0030496//GO:0005813//GO:0005874//GO:0010008	GO:0000166//GO:0003777//GO:0005515//GO:0005524	GO:0000910//GO:0032438//GO:0008333//GO:0007018//GO:0035459//GO:0006886
GOAT_ENSBTAP00000025659	283	154	162	1277	1532	1582	18.5876	10.2482	12.115	76.354	90.9482	93.3987	199.667	1463.67	13.6503	86.9003	2.67043	2.57e-19	1.07e-17	NARS	sp|Q2KJG3|SYNC_BOVIN Asparagine--tRNA ligase, cytoplasmic OS=Bos taurus GN=NARS PE=2 SV=3//1.43555e-09	GO:0005737	GO:0004812//GO:0004816//GO:0000166//GO:0003676//GO:0016874//GO:0005524	GO:0006421//GO:0006418//GO:0006412
GOAT_ENSBTAP00000025703	6	8	7	178	177	196	0.394806	0.533349	0.52445	10.6625	10.527	11.5928	7	183.667	0.484202	10.9274	4.4962	4.97e-23	3.8e-21	BTBD3	sp|Q9Y2F9|BTBD3_HUMAN BTB/POZ domain-containing protein 3 OS=Homo sapiens GN=BTBD3 PE=2 SV=1//0	GO:0043234//GO:0000932	GO:0005515	--
GOAT_ENSBTAP00000025755	60	85	47	366	414	431	2.43956	3.50162	2.17586	13.5471	15.2146	15.752	64	403.667	2.70568	14.8379	2.45522	5.69e-12	6.58e-11	ITPKB	sp|P27987|IP3KB_HUMAN Inositol-trisphosphate 3-kinase B OS=Homo sapiens GN=ITPKB PE=1 SV=5//2.23277e-33	--	GO:0008440	GO:0045061//GO:0045059//GO:0046638//GO:0030217//GO:0000165//GO:0046579//GO:0007166
GOAT_ENSBTAP00000025851	903	1201	993	458	413	432	187.185	252.241	234.372	86.4277	77.3806	80.4942	1032.33	434.333	224.599	81.4342	-1.46365	1.92e-10	1.68e-09	MALSU1	sp|Q96EH3|MASU1_HUMAN Mitochondrial assembly of ribosomal large subunit protein 1 OS=Homo sapiens GN=MALSU1 PE=1 SV=1//1.33071e-103	GO:0005737//GO:0005739	--	GO:0042273//GO:0070130
GOAT_ENSBTAP00000025878	16	42	18	274	333	334	0.452869	1.20446	0.580094	7.06005	8.51914	8.49761	25.3333	313.667	0.745806	8.0256	3.42774	1.28e-20	6.61e-19	KIAA0232	sp|Q92628|K0232_HUMAN Uncharacterized protein KIAA0232 OS=Homo sapiens GN=KIAA0232 PE=1 SV=5//1.66418e-83
GOAT_ENSBTAP00000025921	31	19	18	314	306	299	2.09756	1.30255	1.38675	19.3414	18.7143	18.1854	22.6667	306.333	1.59562	18.747	3.55447	1.36e-21	8.17e-20	ASB3	sp|Q08DV6|ASB3_BOVIN Ankyrin repeat and SOCS box protein 3 OS=Bos taurus GN=ASB3 PE=2 SV=1//2.83477e-12	GO:0005622	GO:0005515	GO:0035556
GOAT_ENSBTAP00000025963	16864	19845	18062	9057	8853	9682	2541.05	3029.65	3098.78	1242.34	1205.71	1311.34	18257	9197.33	2889.83	1253.13	-1.20545	4.97e-13	6.97e-12	Rpl10a	sp|P62907|RL10A_RAT 60S ribosomal protein L10a OS=Rattus norvegicus GN=Rpl10a PE=1 SV=2//1.49219e-140	GO:0015934//GO:0005840//GO:0022625//GO:0030529//GO:0005622	GO:0003735//GO:0003723	GO:0006412
GOAT_ENSBTAP00000026036	3322	3799	3185	1651	1486	1686	1609.89	1865.33	1757.44	728.365	650.901	734.434	3435.33	1607.67	1744.22	704.567	-1.30777	3.78e-19	1.54e-17	Tceb2	sp|P62870|ELOB_RAT Transcription elongation factor B polypeptide 2 OS=Rattus norvegicus GN=Tceb2 PE=1 SV=1//1.46891e-43	--	GO:0003746//GO:0005515	GO:0006414
GOAT_ENSBTAP00000026068	77	45	43	500	526	551	4.43945	2.6287	2.8228	26.243	27.4109	28.5554	55	525.667	3.29698	27.4031	3.05512	2.41e-20	1.19e-18	NCOA4	sp|Q13772|NCOA4_HUMAN Nuclear receptor coactivator 4 OS=Homo sapiens GN=NCOA4 PE=1 SV=1//4.66831e-22	GO:0005739	GO:0004872	--
GOAT_ENSBTAP00000026175	134	66	75	451	405	368	12.9877	6.48127	8.27679	39.7932	35.4798	32.0607	91.6667	408	9.24859	35.7779	1.95176	3.74e-07	1.82e-06	TFDP1	sp|Q17QZ4|TFDP1_BOVIN Transcription factor Dp-1 OS=Bos taurus GN=TFDP1 PE=2 SV=1//6.35013e-130	GO:0005667//GO:0005634	GO:0005515//GO:0003700//GO:0003677	GO:2000278//GO:0000084//GO:0006915//GO:0006355//GO:0045893//GO:0008544//GO:0007049//GO:0006351
GOAT_ENSBTAP00000026221	372	455	323	1750	2042	2308	24.6135	30.5021	24.3336	105.408	122.119	137.266	383.333	2033.33	26.4831	121.598	2.19898	2.69e-12	3.3e-11	CLIP3	sp|Q96DZ5|CLIP3_HUMAN CAP-Gly domain-containing linker protein 3 OS=Homo sapiens GN=CLIP3 PE=1 SV=3//3.57026e-09	GO:0045121//GO:0055038//GO:0005792//GO:0005802//GO:0032588//GO:0005886//GO:0031901	GO:0035594//GO:0008017//GO:0005515	GO:0018230//GO:0031115//GO:0010828//GO:0043065//GO:0044091//GO:0045444//GO:0045807//GO:0090004//GO:0001934//GO:0072321
GOAT_ENSBTAP00000026319	37	14	16	195	205	159	4.80753	1.84305	2.36708	23.0653	24.0754	18.5701	22.3333	186.333	3.00589	21.9036	2.86531	1.65e-11	1.76e-10	TMEM106B	sp|Q3ZC25|T106B_BOVIN Transmembrane protein 106B OS=Bos taurus GN=TMEM106B PE=2 SV=1//0	GO:0016021//GO:0016020//GO:0005764//GO:0005765//GO:0005768//GO:0031902	--	--
GOAT_ENSBTAP00000026366	2204	2218	2004	1163	1439	1434	339.223	345.879	351.192	162.951	200.186	198.39	2142	1345.33	345.431	187.176	-0.884004	3.43e-14	5.96e-13	PAFAH1B3	sp|Q29460|PA1B3_BOVIN Platelet-activating factor acetylhydrolase IB subunit gamma OS=Bos taurus GN=PAFAH1B3 PE=1 SV=1//1.20388e-159	GO:0005737	GO:0016787//GO:0003847//GO:0005515	GO:0016042//GO:0007283
GOAT_ENSBTAP00000026372	92	63	67	449	497	421	15.2744	10.5975	12.6655	67.862	74.5814	62.8283	74	455.667	12.8458	68.4239	2.4132	4.85e-12	5.67e-11	Sypl1	sp|O09117|SYPL1_MOUSE Synaptophysin-like protein 1 OS=Mus musculus GN=Sypl1 PE=1 SV=2//1.54723e-10	GO:0008021//GO:0030141//GO:0016021//GO:0016020	GO:0005215	GO:0006810
GOAT_ENSBTAP00000026387	4117	6380	4908	1579	1498	1682	1181.14	1854.51	1603.23	412.388	388.445	433.753	5135	1586.33	1546.29	411.529	-1.90975	2.51e-08	1.5e-07	SNRNP25	sp|Q3ZBQ4|SNR25_BOVIN U11/U12 small nuclear ribonucleoprotein 25 kDa protein OS=Bos taurus GN=SNRNP25 PE=2 SV=2//4.02501e-85	GO:0005689//GO:0005634//GO:0005681	--	GO:0008380//GO:0006397
GOAT_ENSBTAP00000026420	1350	1388	1133	763	756	758	177.337	184.733	169.461	91.2422	89.7609	89.5022	1290.33	759	177.177	90.1684	-0.974498	2.87e-15	6.03e-14	MRPL46	sp|Q3SZ22|RM46_BOVIN 39S ribosomal protein L46, mitochondrial OS=Bos taurus GN=MRPL46 PE=2 SV=1//3.9505e-25	GO:0005739	GO:0016787	--
GOAT_ENSBTAP00000026423	13	5	5	189	172	159	0.866543	0.33768	0.379481	11.4687	10.3627	9.52669	7.66667	173.333	0.527901	10.4527	4.30746	7.92e-21	4.2e-19	TGFBR2	sp|P37173|TGFR2_HUMAN TGF-beta receptor type-2 OS=Homo sapiens GN=TGFBR2 PE=1 SV=2//0	GO:0043235//GO:0016021//GO:0016020	GO:0016772//GO:0005026//GO:0000166//GO:0004674//GO:0004702//GO:0005524//GO:0004872//GO:0004672//GO:0046872//GO:0004713	GO:0006468//GO:0007179//GO:0023014//GO:0007178
GOAT_ENSBTAP00000026526	156	43	37	1082	1014	986	18.7104	5.22535	5.05281	118.138	109.925	106.3	78.6667	1027.33	9.66284	111.454	3.52786	7.05e-32	1.63e-29	SDCBP	sp|O00560|SDCB1_HUMAN Syntenin-1 OS=Homo sapiens GN=SDCBP PE=1 SV=1//0	GO:0005737//GO:0070062//GO:0005886//GO:0005895	GO:0047485//GO:0005137//GO:0005109//GO:0005515//GO:0045545//GO:0046982	GO:0042327//GO:0007265
GOAT_ENSBTAP00000026598	168	118	97	579	469	498	7.42878	5.28664	4.88375	23.3073	18.7448	19.7941	127.667	515.333	5.86639	20.6154	1.81318	2.29e-06	9.71e-06	RASA3	sp|Q28013|RASA3_BOVIN Ras GTPase-activating protein 3 OS=Bos taurus GN=RASA3 PE=2 SV=1//4.45691e-07	GO:0005622//GO:0031235	GO:0015278//GO:0005543//GO:0005096//GO:0005515	GO:0051056//GO:0043547//GO:0007165//GO:0035556
GOAT_ENSBTAP00000026632	1162	1122	946	736	692	741	221.655	216.847	205.464	127.807	119.31	127.054	1076.67	723	214.655	124.723	-0.783289	2.92e-12	3.57e-11		sp|Q56JY0|HIKES_BOVIN Protein Hikeshi OS=Bos taurus PE=2 SV=1//3.1803e-19	GO:0005737//GO:0005829//GO:0005622//GO:0005634	GO:0008565//GO:0030544	GO:0007030//GO:0030324//GO:0034605//GO:0006810//GO:0006606//GO:0015031
GOAT_ENSBTAP00000026635	2826	2827	2424	2237	2189	2148	353.118	359.92	344.868	254.459	247.225	241.257	2692.33	2191.33	352.635	247.647	-0.514573	6.08e-09	1.68e-08	HAGH	sp|Q4R6C1|GLO2_MACFA Hydroxyacylglutathione hydrolase, mitochondrial OS=Macaca fascicularis GN=HAGH PE=2 SV=2//1.35495e-37	GO:0005737//GO:0005739//GO:0005759	GO:0016787//GO:0004416//GO:0008270//GO:0046872	GO:0006750
GOAT_ENSBTAP00000026700	13	16	8	150	205	155	0.510066	0.636051	0.357393	5.35771	7.27002	5.46654	12.3333	170	0.50117	6.03142	3.58913	5.43e-16	1.29e-14	FAM13B	sp|Q9NYF5|FA13B_HUMAN Protein FAM13B OS=Homo sapiens GN=FAM13B PE=2 SV=2//6.33473e-08	GO:0005622	--	GO:0007165
GOAT_ENSBTAP00000026724	80	25	31	1173	1083	715	7.31868	2.31725	3.22907	97.689	89.551	58.7959	45.3333	990.333	4.28833	82.012	4.25735	1.57e-16	4.04e-15	TXNIP	sp|Q2HY40|TXNIP_PIG Thioredoxin-interacting protein OS=Sus scrofa GN=TXNIP PE=2 SV=1//0	GO:0005737	GO:0031625//GO:0005515//GO:0004857	GO:0030216//GO:0000122//GO:0006606//GO:0071228//GO:0043086//GO:0051782//GO:0048008//GO:0006979
GOAT_ENSBTAP00000026769	350	210	190	1375	1462	1352	17.2648	10.4955	10.6714	61.745	65.184	59.9472	250	1396.33	12.8106	62.2921	2.28171	2.98e-13	4.35e-12	CUL4A	sp|Q13619|CUL4A_HUMAN Cullin-4A OS=Homo sapiens GN=CUL4A PE=1 SV=3//0	GO:0080008//GO:0031461//GO:0031464	GO:0031625//GO:0005515	GO:0007346//GO:0051246//GO:0006511//GO:0045750
GOAT_ENSBTAP00000026793	174	199	126	912	1116	1064	5.93712	6.87969	4.8952	28.3287	34.4183	32.6337	166.333	1030.67	5.904	31.7935	2.42897	9.15e-15	1.75e-13	UBE2O	sp|Q9C0C9|UBE2O_HUMAN Ubiquitin-conjugating enzyme E2 O OS=Homo sapiens GN=UBE2O PE=1 SV=3//5.32531e-17	--	GO:0016881	--
GOAT_ENSBTAP00000026869	214	127	106	747	796	809	11.4543	6.88727	6.46001	36.3982	38.5094	38.9225	149	784	8.26719	37.9433	2.19838	5.3e-11	5.14e-10	HBS1L	sp|Q2KHZ2|HBS1L_BOVIN HBS1-like protein OS=Bos taurus GN=HBS1L PE=2 SV=1//9.47424e-15	--	GO:0005525//GO:0003924//GO:0000166	GO:0006184
GOAT_ENSBTAP00000026875	966	1070	839	644	585	650	96.2285	107.994	95.1616	58.4006	52.6722	58.202	958.333	626.333	99.7947	56.4249	-0.82263	1.18e-12	1.56e-11		sp|Q58DG1|MYG1_BOVIN UPF0160 protein MYG1, mitochondrial OS=Bos taurus PE=2 SV=1//2.21543e-16	GO:0005634//GO:0005739	--	--
GOAT_ENSBTAP00000026897	70	21	28	499	521	600	10.4596	3.17926	4.76375	67.8771	70.3647	80.5874	39.6667	540	6.13421	72.943	3.57182	2.2e-27	3.07e-25	Fgf13	sp|Q9ERW3|FGF13_RAT Fibroblast growth factor 13 OS=Rattus norvegicus GN=Fgf13 PE=1 SV=2//1.97166e-14
GOAT_ENSBTAP00000026951	60	39	18	604	719	706	7.79599	5.13421	2.66297	71.4433	84.4399	82.4561	39	676.333	5.19772	79.4464	3.93403	8.04e-35	2.84e-32	NECAP1	sp|Q3T093|NECP1_BOVIN Adaptin ear-binding coat-associated protein 1 OS=Bos taurus GN=NECAP1 PE=2 SV=1//1.32802e-156	GO:0030665//GO:0031410//GO:0016020//GO:0005905//GO:0005886//GO:0030125	GO:0005515	GO:0006810//GO:0006897//GO:0015031
GOAT_ENSBTAP00000027001	22	20	20	297	247	247	0.432778	0.398622	0.447967	5.31868	4.39176	4.36754	20.6667	263.667	0.426456	4.69266	3.45994	2.49e-19	1.05e-17	PSME4	sp|Q14997|PSME4_HUMAN Proteasome activator complex subunit 4 OS=Homo sapiens GN=PSME4 PE=1 SV=2//8.9343e-18	--	GO:0005488	--
GOAT_ENSBTAP00000027016	86	65	69	356	300	315	3.17948	2.43478	2.90456	11.9815	10.0248	10.468	73.3333	323.667	2.8396	10.8248	1.93058	1.27e-06	5.63e-06	NFKB1	sp|Q6F3J0|NFKB1_CANFA Nuclear factor NF-kappa-B p105 subunit OS=Canis familiaris GN=NFKB1 PE=2 SV=2//9.69978e-06	GO:0005737//GO:0005634//GO:0005739//GO:0005829	GO:0003677//GO:0043565//GO:0042803//GO:0008134//GO:0044212//GO:0000976//GO:0003700//GO:0005515//GO:0000975//GO:0001071	GO:0090263//GO:0071260//GO:0007165//GO:0050728//GO:0000122//GO:0045083//GO:0045892//GO:0010956//GO:0006355//GO:0045944//GO:0071347//GO:0001818
GOAT_ENSBTAP00000027067	118	43	68	535	493	517	8.77938	3.24145	5.76055	36.236	33.1534	34.5757	76.3333	515	5.92713	34.655	2.54766	5.87e-14	9.81e-13	G3BP	sp|Q32LC7|G3BP1_BOVIN Ras GTPase-activating protein-binding protein 1 OS=Bos taurus GN=G3BP PE=2 SV=1//0	GO:0005737//GO:0016020//GO:0005634//GO:0005622//GO:0010494//GO:0005886//GO:0005829	GO:0005515//GO:0016787//GO:0004518//GO:0004519//GO:0003723//GO:0003676//GO:0004386//GO:0000166//GO:0003677//GO:0005524//GO:0003729	GO:0090090//GO:0006810//GO:0090305
GOAT_ENSBTAP00000027072	74	122	85	588	716	680	4.40092	7.35124	5.75578	31.8342	38.4879	36.3512	93.6667	661.333	5.83598	35.5577	2.60712	6.44e-16	1.5e-14	fnbp1	sp|Q6GNV5|FNBP1_XENLA Formin-binding protein 1 homolog OS=Xenopus laevis GN=fnbp1 PE=2 SV=1//3.13343e-20	GO:0005622	GO:0042802//GO:0005515	GO:0007165
GOAT_ENSBTAP00000027115	601	285	363	2496	2290	2257	69.0795	33.1901	47.5066	261.17	237.908	233.187	416.333	2347.67	49.9254	244.088	2.28956	3.35e-14	5.85e-13	CNN3	sp|Q32L92|CNN3_BOVIN Calponin-3 OS=Bos taurus GN=CNN3 PE=2 SV=1//0	--	GO:0003779//GO:0008017//GO:0005515//GO:0005516	GO:0031032
GOAT_ENSBTAP00000027116	235	186	76	828	890	888	31.2128	25.0304	11.4935	100.115	106.845	106.017	165.667	868.667	22.5789	104.326	2.20805	3.9e-11	3.87e-10	CCDC92	sp|Q53HC0|CCD92_HUMAN Coiled-coil domain-containing protein 92 OS=Homo sapiens GN=CCDC92 PE=1 SV=2//4.5602e-146
GOAT_ENSBTAP00000027147	1077	1516	1143	650	704	715	88.3819	126.048	106.799	48.5586	52.2179	52.7414	1245.33	689.667	107.076	51.1726	-1.0652	5.15e-07	2.44e-06	TBL3	sp|Q2KJJ5|TBL3_BOVIN Transducin beta-like protein 3 OS=Bos taurus GN=TBL3 PE=2 SV=1//0	GO:0005634//GO:0032040//GO:0005730	GO:0005515	GO:0006364
GOAT_ENSBTAP00000027191	5952	7101	5986	2648	2385	2669	1452.03	1755.17	1662.73	588.077	525.895	585.273	6346.33	2567.33	1623.31	566.415	-1.51901	5.14e-17	1.45e-15	NDUFB9	sp|Q02369|NDUB9_BOVIN NADH dehydrogenase [ubiquinone] 1 beta subcomplex subunit 9 OS=Bos taurus GN=NDUFB9 PE=1 SV=2//2.88146e-20	GO:0016020//GO:0005739//GO:0005743//GO:0005747//GO:0070469	--	GO:0022900
GOAT_ENSBTAP00000027236	89	63	66	368	321	336	2.28303	1.63739	1.9277	8.59359	7.44262	7.74746	72.6667	341.667	1.94937	7.92789	2.02393	1.83e-07	9.38e-07	KIF27	sp|Q86VH2|KIF27_HUMAN Kinesin-like protein KIF27 OS=Homo sapiens GN=KIF27 PE=2 SV=1//2.43482e-17	GO:0005929//GO:0005874	GO:0003777//GO:0000166//GO:0005524//GO:0005515	GO:0042384//GO:0021591//GO:0007018//GO:0003351
GOAT_ENSBTAP00000027310	178	80	101	922	871	884	33.954	15.4615	21.9364	160.106	150.172	151.573	119.667	892.333	23.784	153.95	2.6944	4.58e-18	1.57e-16		sp|Q99LU8|CF062_MOUSE Uncharacterized protein C6orf62 homolog OS=Mus musculus PE=2 SV=1//1.98927e-125	GO:0005622	--	--
GOAT_ENSBTAP00000027348	86	32	33	488	520	546	7.34308	2.76834	3.20824	37.9319	40.1312	41.9054	50.3333	518	4.43989	39.9895	3.17103	1.36e-21	8.17e-20	IDH1	sp|Q6XUZ5|IDHC_SHEEP Isocitrate dehydrogenase [NADP] cytoplasmic OS=Ovis aries GN=IDH1 PE=2 SV=1//4.30859e-15	GO:0005737//GO:0005829//GO:0005739	GO:0016616//GO:0051287//GO:0000287//GO:0004450//GO:0042803//GO:0005102//GO:0046872//GO:0016491	GO:0006749//GO:0006099//GO:0006103//GO:0006102//GO:0006097//GO:0006979//GO:0055114
GOAT_ENSBTAP00000027352	2642	2848	2365	1520	1487	1476	350.912	383.261	357.659	183.787	178.515	176.218	2618.33	1494.33	363.944	179.506	-1.01968	1.5e-16	3.89e-15	MTIF3	sp|Q32KZ1|IF3M_BOVIN Translation initiation factor IF-3, mitochondrial OS=Bos taurus GN=MTIF3 PE=2 SV=1//4.748e-175	GO:0005739	GO:0008135//GO:0043024//GO:0003743	GO:0006446//GO:0032790//GO:0006413//GO:0006412
GOAT_ENSBTAP00000027388	2047	1938	2133	1133	826	799	496.004	475.784	588.48	249.921	180.903	174.025	2039.33	919.333	520.089	201.616	-1.36715	3.58e-17	1.05e-15	AIF1	sp|Q9BDK2|AIF1_BOVIN Allograft inflammatory factor 1 OS=Bos taurus GN=AIF1 PE=2 SV=1//1.93658e-07	GO:0005737//GO:0001726//GO:0005634//GO:0048471//GO:0030027//GO:0005884//GO:0032587//GO:0001891//GO:0005829	GO:0005509//GO:0005515//GO:0051015	GO:0090026//GO:0016601//GO:2000406//GO:0048662//GO:0048661//GO:0051017//GO:0042102//GO:0006954//GO:0030041//GO:0006911//GO:0097178//GO:0071346//GO:0071673//GO:0071672
GOAT_ENSBTAP00000027436	2293	2113	1929	813	548	590	1326.3	1238.3	1270.41	428.088	286.495	306.752	2111.67	650.333	1278.34	340.445	-1.90877	6.45e-34	1.98e-31	OTOS	sp|Q8NHW6|OTOSP_HUMAN Otospiralin OS=Homo sapiens GN=OTOS PE=2 SV=1//1.64539e-36
GOAT_ENSBTAP00000027439	8	10	6	119	143	137	0.683077	0.865105	0.583316	9.24978	11.0361	10.5147	8	133	0.7105	10.2669	3.85302	2.91e-15	6.12e-14	KCTD20	sp|Q7Z5Y7|KCD20_HUMAN BTB/POZ domain-containing protein KCTD20 OS=Homo sapiens GN=KCTD20 PE=1 SV=1//0	--	GO:0005515	GO:0051260
GOAT_ENSBTAP00000027473	62	70	36	323	343	311	2.00669	2.2955	1.32668	9.51692	10.0342	9.0479	56	325.667	1.87629	9.533	2.34505	5.57e-10	4.49e-09	DGKD	sp|Q16760|DGKD_HUMAN Diacylglycerol kinase delta OS=Homo sapiens GN=DGKD PE=1 SV=4//0	GO:0005737//GO:0016023//GO:0005886	GO:0016301//GO:0005543//GO:0005515//GO:0046982//GO:0004143//GO:0042803	GO:0007205//GO:0016310//GO:0051260//GO:0035556//GO:0010033
GOAT_ENSBTAP00000027499	111	39	50	507	509	482	6.97133	2.48169	3.5755	28.9872	28.8941	27.2106	66.6667	499.333	4.34284	28.364	2.70735	1.39e-15	3.07e-14	VPS45	sp|Q9NRW7|VPS45_HUMAN Vacuolar protein sorting-associated protein 45 OS=Homo sapiens GN=VPS45 PE=1 SV=1//4.26767e-52	GO:0070820//GO:0016324//GO:0005829//GO:0044194//GO:0000139//GO:0042581//GO:0042582//GO:0005886//GO:0031201//GO:0010008	GO:0030348//GO:0005515//GO:0017075	GO:0016192//GO:0006904//GO:0006887//GO:0043312//GO:0001909
GOAT_ENSBTAP00000027504	57	28	34	424	375	322	11.8843	5.91491	8.07147	80.4769	70.6693	60.3468	39.6667	373.667	8.62358	70.4977	3.03122	9.83e-18	3.17e-16	TIMP3	sp|Q5PXZ9|TIMP3_MACMU Metalloproteinase inhibitor 3 OS=Macaca mulatta GN=TIMP3 PE=2 SV=1//6.46954e-125	GO:0005604//GO:0031012//GO:0005576	GO:0005515//GO:0008191	GO:0051045//GO:0071310
GOAT_ENSBTAP00000027526	56	50	49	457	422	445	4.34685	3.9323	4.33068	32.293	29.6073	31.0488	51.6667	441.333	4.20328	30.983	2.88189	2.89e-17	8.69e-16	BSDC1	sp|Q3SX22|BSDC1_BOVIN BSD domain-containing protein 1 OS=Bos taurus GN=BSDC1 PE=2 SV=1//0
GOAT_ENSBTAP00000027527	46	42	20	349	342	369	0.366911	0.339423	0.181638	2.53415	2.46563	2.64562	36	353.333	0.29599	2.54847	3.10601	5.46e-18	1.85e-16	FAT1	sp|Q14517|FAT1_HUMAN Protocadherin Fat 1 OS=Homo sapiens GN=FAT1 PE=1 SV=2//8.17269e-06	GO:0030027//GO:0005634//GO:0016020//GO:0030175//GO:0005911//GO:0005886//GO:0048471//GO:0016021//GO:0030054	GO:0005515//GO:0005509	GO:0007015//GO:0016337//GO:0007163//GO:0007155//GO:0007156
GOAT_ENSBTAP00000027539	3862	4223	3705	2444	2384	2428	692.486	767.201	756.416	398.938	386.371	391.332	3930	2418.67	738.701	392.214	-0.913351	6.28e-15	1.24e-13	SARNP	sp|Q5R4V4|SARNP_PONAB SAP domain-containing ribonucleoprotein OS=Pongo abelii GN=SARNP PE=2 SV=3//2.61675e-83	--	GO:0003676	--
GOAT_ENSBTAP00000027559	108	71	110	934	1033	1245	3.92406	2.61372	4.5507	30.8932	33.9243	40.6611	96.3333	1070.67	3.69616	35.1596	3.24982	2.11e-22	1.47e-20	CNTN1	sp|Q28106|CNTN1_BOVIN Contactin-1 OS=Bos taurus GN=CNTN1 PE=2 SV=1//9.49249e-12
GOAT_ENSBTAP00000027587	61	85	61	270	311	297	2.68741	3.79413	3.0599	10.8286	12.3841	11.7614	69	292.667	3.18048	11.658	1.87401	5.07e-06	2.01e-05	CLCN6	sp|P51797|CLCN6_HUMAN Chloride transport protein 6 OS=Homo sapiens GN=CLCN6 PE=1 SV=2//9.47305e-15	GO:0016021//GO:0016020	GO:0005515//GO:0005247//GO:0005216	GO:0055085//GO:0006821
GOAT_ENSBTAP00000027612	1101	1831	2133	632	801	672	181.952	306.582	401.359	95.0804	119.647	99.8244	1688.33	701.667	296.631	104.851	-1.50034	0.000816475	0.00216589	MMTAG2	sp|Q58DU0|MMTA2_BOVIN Multiple myeloma tumor-associated protein 2 homolog OS=Bos taurus GN=MMTAG2 PE=2 SV=1//1.59049e-59
GOAT_ENSBTAP00000027614	1663	2080	1548	734	645	772	469.589	595.083	497.702	188.68	164.621	195.948	1763.67	717	520.791	183.083	-1.50821	1.17e-13	1.87e-12	MRPL55	sp|P0C2B8|RM55_BOVIN 39S ribosomal protein L55, mitochondrial OS=Bos taurus GN=MRPL55 PE=1 SV=1//2.85104e-62	GO:0005840//GO:0005739//GO:0030529//GO:0005762	GO:0003735	GO:0006412
GOAT_ENSBTAP00000027619	99	124	92	430	478	442	4.52844	5.74677	4.79153	17.9055	19.7624	18.1733	105	450	5.02224	18.6137	1.88996	5.96e-07	2.79e-06	Arhgef7	sp|Q9ES28|ARHG7_MOUSE Rho guanine nucleotide exchange factor 7 OS=Mus musculus GN=Arhgef7 PE=1 SV=2//0	GO:0043234//GO:0030027//GO:0005622//GO:0043005//GO:0043025	GO:0005089//GO:0005543//GO:0005085//GO:0005515//GO:0019901	GO:0043547//GO:0030032//GO:0043065//GO:0035023
GOAT_ENSBTAP00000027627	16026	19821	20533	7783	6249	6604	4387.15	5497.59	6400.05	1939.59	1546.21	1625.04	18793.3	6878.67	5428.27	1703.61	-1.6719	1.55e-09	1.15e-08	Rps15a	sp|P62246|RS15A_RAT 40S ribosomal protein S15a OS=Rattus norvegicus GN=Rps15a PE=1 SV=2//7.33328e-21	GO:0005737//GO:0005739//GO:0005622//GO:0030529//GO:0022627//GO:0005840	GO:0003735	GO:0008284//GO:0045787//GO:0009615//GO:0006412
GOAT_ENSBTAP00000027628	164	64	81	1894	1990	2040	28.8299	11.399	16.2128	303.098	316.192	322.349	103	1974.67	18.8139	313.88	4.06034	9.32e-48	1.98e-44	ARL6IP1	sp|Q5R454|AR6P1_PONAB ADP-ribosylation factor-like protein 6-interacting protein 1 OS=Pongo abelii GN=ARL6IP1 PE=2 SV=1//6.64087e-28	GO:0005737//GO:0005784//GO:0005829//GO:0016021//GO:0005783	GO:0005515	GO:0006613
GOAT_ENSBTAP00000027633	43	28	19	226	273	217	12.1421	8.01074	6.10875	58.095	69.6766	55.0786	30	238.667	8.75386	60.9501	2.79964	1.84e-12	2.32e-11	Sox8	sp|Q04886|SOX8_MOUSE Transcription factor SOX-8 OS=Mus musculus GN=Sox8 PE=2 SV=2//2.97947e-56	GO:0005737//GO:0005634	GO:0003677//GO:0043565//GO:0008134//GO:0003700//GO:0005515//GO:0000979	GO:0060009//GO:0090184//GO:0048469//GO:0008584//GO:0048484//GO:0010628//GO:0060041//GO:0060612//GO:0072289//GO:0045444//GO:0001649//GO:0014015//GO:0001701//GO:0072034//GO:0043066//GO:0045662//GO:0060221//GO:0072197//GO:0061138//GO:0048709//GO:0090190//GO:0060018//GO:0035914//GO:0007283//GO:0045892//GO:0045893//GO:0001755//GO:0010817//GO:0045165//GO:0007422//GO:0033690//GO:0046533//GO:0045944//GO:…
GOAT_ENSBTAP00000027713	11748	16234	15192	5036	4546	4737	5137.82	7193.33	7564.9	2004.96	1796.98	1862.16	14391.3	4773	6632.02	1888.03	-1.81256	3.27e-09	2.29e-08	RPS21	sp|P63221|RS21_PIG 40S ribosomal protein S21 OS=Sus scrofa GN=RPS21 PE=3 SV=1//9.25513e-11	GO:0030529//GO:0005622//GO:0022627//GO:0005840	GO:0003735	GO:0042274//GO:0000461//GO:0000447//GO:0006414//GO:0006412
GOAT_ENSBTAP00000027728	18423	21590	20394	9770	9174	9633	4857.92	5768.09	6123.02	2345.25	2186.49	2283.23	20135.7	9525.67	5583.01	2271.66	-1.2973	1.01e-12	1.35e-11	FAU	sp|P62865|UBIM_BOVIN Ubiquitin-like protein FUBI OS=Bos taurus GN=FAU PE=3 SV=1//2.27278e-08	GO:0005840//GO:0030529//GO:0005622	GO:0003735	GO:0006412
GOAT_ENSBTAP00000027744	87	43	52	386	394	395	16.4208	8.22305	11.1751	66.3235	67.2157	67.0148	60.6667	391.667	11.9397	66.8513	2.48519	3.9e-12	4.65e-11	YY1	sp|P25490|TYY1_HUMAN Transcriptional repressor protein YY1 OS=Homo sapiens GN=YY1 PE=1 SV=2//1.04796e-122	GO:0031011//GO:0031519//GO:0005634//GO:0005886//GO:0005622//GO:0005667	GO:0008270//GO:0003677//GO:0001078//GO:0005515//GO:0044212//GO:0000400//GO:0003700//GO:0003723	GO:0034644//GO:0000724//GO:0006403//GO:0048593//GO:0006974//GO:0007283//GO:0010225//GO:0009952//GO:0051276//GO:0000122//GO:0006355
GOAT_ENSBTAP00000027804	82	19	29	385	182	1834	6.0883	1.4293	2.45162	26.0224	12.2138	122.399	43.3333	800.333	3.32307	53.5452	4.01017	0.121771	0.196357	DDC	sp|P27718|DDC_BOVIN Aromatic-L-amino-acid decarboxylase OS=Bos taurus GN=DDC PE=2 SV=2//0
GOAT_ENSBTAP00000027858	189	194	168	742	759	718	7.48932	7.78881	7.57989	26.7663	27.1845	25.5742	183.667	739.667	7.61934	26.5084	1.79871	7.09e-07	3.28e-06	FNBP4	sp|Q8N3X1|FNBP4_HUMAN Formin-binding protein 4 OS=Homo sapiens GN=FNBP4 PE=1 SV=3//6.38982e-06	GO:0005634	GO:0005515	--
GOAT_ENSBTAP00000027888	28	17	11	179	169	196	2.69926	1.66044	1.2074	15.7088	14.7256	16.984	18.6667	181.333	1.8557	15.8061	3.09045	6.19e-13	8.54e-12	SNAPC1	sp|Q4R6W9|SNPC1_MACFA snRNA-activating protein complex subunit 1 OS=Macaca fascicularis GN=SNAPC1 PE=2 SV=1//0
GOAT_ENSBTAP00000027890	1750	2083	2165	722	716	852	825.759	995.85	1163.18	310.14	305.371	361.371	1999.33	763.333	994.929	325.627	-1.61137	2.27e-10	1.95e-09	PLAC9	sp|Q2TBK3|PLAC9_BOVIN Placenta-specific protein 9 OS=Bos taurus GN=PLAC9 PE=3 SV=1//7.99451e-15	GO:0005576	--	--
GOAT_ENSBTAP00000027951	103	36	22	434	460	526	7.64749	2.70816	1.85985	29.3343	30.8702	35.1047	53.6667	473.333	4.07183	31.7697	2.9639	2.21e-16	5.55e-15	SUSD4	sp|Q5VX71|SUSD4_HUMAN Sushi domain-containing protein 4 OS=Homo sapiens GN=SUSD4 PE=2 SV=1//1.21271e-10
GOAT_ENSBTAP00000027961	63	25	33	415	523	473	7.9552	3.19845	4.74458	47.705	59.6914	53.6871	40.3333	470.333	5.29941	53.6945	3.34087	3.36e-23	2.64e-21	CLDND1	sp|Q4R4Z3|CLDN1_MACFA Claudin domain-containing protein 1 OS=Macaca fascicularis GN=CLDND1 PE=2 SV=1//3.35247e-59	GO:0016324//GO:0016020	--	--
GOAT_ENSBTAP00000027991	122	176	120	608	682	660	7.114	10.3981	7.96725	32.2747	35.9449	34.5936	139.333	650	8.49313	34.2711	2.01262	8.48e-09	5.53e-08	KHSRP	sp|Q92945|FUBP2_HUMAN Far upstream element-binding protein 2 OS=Homo sapiens GN=KHSRP PE=1 SV=4//5.81037e-15	GO:0010494//GO:0005634	GO:0003723	--
GOAT_ENSBTAP00000028053	209	141	95	1079	1260	1400	19.8808	13.5893	10.2893	93.4359	108.332	119.705	148.333	1246.33	14.5864	107.158	2.87704	1.88e-21	1.09e-19	Actr1a	sp|P85515|ACTZ_RAT Alpha-centractin OS=Rattus norvegicus GN=Actr1a PE=1 SV=1//3.57896e-13	GO:0005737//GO:0005856//GO:0005813	GO:0000166//GO:0005524	--
GOAT_ENSBTAP00000028111	74	23	34	374	398	380	7.41272	2.33433	3.87791	34.1053	36.0353	34.2159	43.6667	384	4.54166	34.7855	2.9372	8.62e-17	2.33e-15	GALM	sp|Q5EA79|GALM_BOVIN Aldose 1-epimerase OS=Bos taurus GN=GALM PE=2 SV=1//0	GO:0005737	GO:0016853//GO:0004034//GO:0030246//GO:0003824	GO:0005975//GO:0019318
GOAT_ENSBTAP00000028113	68	33	48	368	290	325	4.76286	2.34187	3.82801	23.4645	18.3593	20.4616	49.6667	327.667	3.64425	20.7618	2.51024	1.1e-11	1.21e-10	SLC35F5	sp|A6QL92|S35F5_BOVIN Solute carrier family 35 member F5 OS=Bos taurus GN=SLC35F5 PE=2 SV=1//1.58769e-07	GO:0016020//GO:0016021	--	GO:0006810
GOAT_ENSBTAP00000028238	178	93	99	922	937	980	7.48342	3.96143	4.73902	35.2871	35.6056	37.0343	123.333	946.333	5.39462	35.9757	2.73743	6.55e-19	2.57e-17	CDH2	sp|P19534|CADH2_BOVIN Cadherin-2 (Fragment) OS=Bos taurus GN=CDH2 PE=2 SV=1//0	GO:0014704//GO:0045202//GO:0016021//GO:0016020//GO:0030027//GO:0016342//GO:0016324//GO:0005916//GO:0005913//GO:0005912//GO:0005911//GO:0005886	GO:0042153//GO:0005509//GO:0019903//GO:0045294//GO:0045295//GO:0005515	GO:0016339//GO:0051146//GO:0048514//GO:0016477//GO:0090090//GO:0043410//GO:0007155//GO:0007157//GO:0007156
GOAT_ENSBTAP00000028239	35	17	23	199	194	177	2.52546	1.24283	1.88962	13.0717	12.6524	11.4801	25	190	1.88597	12.4014	2.71712	1.11e-10	1.01e-09	EHD2	sp|Q9NZN4|EHD2_HUMAN EH domain-containing protein 2 OS=Homo sapiens GN=EHD2 PE=1 SV=2//0	GO:0055038//GO:0005624//GO:0016020//GO:0005886//GO:0048471	GO:0005515//GO:0003924//GO:0005509//GO:0019904//GO:0005525	GO:0006897//GO:0030866//GO:0032456//GO:0006184
GOAT_ENSBTAP00000028278	8	15	11	131	155	160	0.289206	0.549412	0.452776	4.31115	5.06463	5.19918	11.3333	148.667	0.430465	4.85832	3.49649	2.38e-14	4.23e-13	Zswim6	sp|Q80TB7|ZSWM6_MOUSE Zinc finger SWIM domain-containing protein 6 (Fragment) OS=Mus musculus GN=Zswim6 PE=2 SV=2//2.34558e-08	--	GO:0008270	GO:0048812
GOAT_ENSBTAP00000028307	20	9	5	164	155	149	2.24135	1.02191	0.638002	16.7312	15.7004	15.0094	11.3333	156	1.30042	15.8137	3.60412	4.16e-15	8.47e-14	SPRY1	sp|A5D992|SPY1_BOVIN Protein sprouty homolog 1 OS=Bos taurus GN=SPRY1 PE=2 SV=1//0	GO:0005886//GO:0005737//GO:0005874//GO:0016020//GO:0042995//GO:0032587//GO:0005856	GO:0019901//GO:0043539//GO:0005515	GO:0051387//GO:0030324//GO:0060437//GO:0048754//GO:0043407//GO:0010628//GO:0071902//GO:0010801//GO:0051897//GO:0007275//GO:0009966//GO:0043066//GO:0060541//GO:0008285//GO:0060425//GO:0007605//GO:0034261//GO:0045165//GO:0001759//GO:0046580//GO:0001656//GO:0001657//GO:0033138//GO:0040037//GO:0042472//GO:0070374//GO:0070373
GOAT_ENSBTAP00000028364	7403	9151	7072	3976	3892	4036	1159.31	1451.95	1260.98	566.819	550.891	568.123	7875.33	3968	1290.75	561.944	-1.19971	2.29e-12	2.84e-11	PSMB4	sp|Q3T108|PSB4_BOVIN Proteasome subunit beta type-4 OS=Bos taurus GN=PSMB4 PE=1 SV=1//8.55769e-43	GO:0005737//GO:0005839//GO:0005634//GO:0000502	GO:0004175//GO:0016787//GO:0004298//GO:0008233//GO:0001530	GO:0051603//GO:0002862//GO:0006508
GOAT_ENSBTAP00000028499	7538	10163	10103	2549	2741	2923	2730.55	3729.97	4166.94	840.559	897.433	951.745	9268	2737.67	3542.49	896.579	-1.98226	1.98e-09	1.44e-08	S100A13	sp|P79342|S10AD_BOVIN Protein S100-A13 OS=Bos taurus GN=S100A13 PE=3 SV=2//2.33348e-63	GO:0005737//GO:0030054//GO:0015630//GO:0005886//GO:0048471	GO:0042379//GO:0005509	GO:0090026//GO:0042742//GO:0034142//GO:0032496//GO:0071624
GOAT_ENSBTAP00000028520	2925	2406	2311	2005	1965	2106	440.735	367.313	396.484	275.024	267.617	285.239	2547.33	2025.33	401.511	275.96	-0.54098	1.63e-09	1.21e-08	PSME1	sp|Q64L94|PSME1_PIG Proteasome activator complex subunit 1 OS=Sus scrofa GN=PSME1 PE=2 SV=1//4.9811e-12	GO:0008537//GO:0000502	GO:0002039//GO:0061133//GO:0005515	GO:0019884//GO:0061136//GO:0010950//GO:0042981
GOAT_ENSBTAP00000028638	169	177	179	50	50	59	47.7633	48.7212	55.3709	12.366	12.2779	14.408	175	53	50.6184	13.0173	-1.96016	7.78e-07	3.58e-06		sp|Q148C7|CA054_BOVIN Uncharacterized protein C1orf54 homolog OS=Bos taurus PE=2 SV=1//2.67743e-15	GO:0005576	--	--
GOAT_ENSBTAP00000028704	225	97	116	866	842	880	6.54939	2.86075	3.84459	22.9478	22.1528	23.025	146	862.667	4.41824	22.7085	2.36169	2.69e-13	3.97e-12	WDR11	sp|Q9BZH6|WDR11_HUMAN WD repeat-containing protein 11 OS=Homo sapiens GN=WDR11 PE=1 SV=1//0	GO:0005737//GO:0005929	GO:0005515	--
GOAT_ENSBTAP00000028718	2173	2635	2206	1182	1103	1099	455.714	559.89	526.759	225.66	209.078	207.171	2338	1128	514.121	213.97	-1.2647	1.16e-13	1.85e-12	NOL7	sp|Q9UMY1|NOL7_HUMAN Nucleolar protein 7 OS=Homo sapiens GN=NOL7 PE=1 SV=2//1.41368e-23	GO:0005634//GO:0005739//GO:0005730	--	--
GOAT_ENSBTAP00000028721	175	61	69	730	696	732	11.4521	4.04452	5.14127	43.4887	41.1677	43.0584	101.667	719.333	6.87931	42.5716	2.62955	4.02e-16	9.72e-15	RANBP9	sp|Q96S59|RANB9_HUMAN Ran-binding protein 9 OS=Homo sapiens GN=RANBP9 PE=1 SV=1//0	GO:0005737//GO:0005634	GO:0005515//GO:0019899	--
GOAT_ENSBTAP00000028761	37	24	10	187	195	204	4.95103	3.25383	1.52359	22.7793	23.5846	24.537	23.6667	195.333	3.24282	23.6336	2.86552	1.13e-11	1.24e-10	TPGS2	sp|Q68CL5|TPGS2_HUMAN Tubulin polyglutamylase complex subunit 2 OS=Homo sapiens GN=TPGS2 PE=2 SV=2//1.95317e-161
GOAT_ENSBTAP00000028983	6235	6696	5403	4293	4232	4532	479.821	522.093	473.425	300.752	294.366	313.495	6111.33	4352.33	491.78	302.871	-0.699308	7.52e-12	8.52e-11	PSMC3	sp|P17980|PRS6A_HUMAN 26S protease regulatory subunit 6A OS=Homo sapiens GN=PSMC3 PE=1 SV=3//1.67345e-09	GO:0022624//GO:0043234//GO:0005737//GO:0005634//GO:0000502//GO:0035861//GO:0000932	GO:0009378//GO:0016887//GO:0031593//GO:0000166//GO:0005524//GO:0016787//GO:0017111//GO:0019903//GO:0005515//GO:0019904	GO:0006919//GO:0006302//GO:0070842//GO:0001824//GO:0030970//GO:0018279//GO:0006281//GO:0031334//GO:0006974//GO:0030163//GO:0006310//GO:0045732//GO:0006511//GO:0019985
GOAT_ENSBTAP00000028994	131	46	64	487	416	434	13.617	4.84459	7.57466	46.0833	39.0843	40.5506	80.3333	445.667	8.67875	41.9061	2.2716	2.52e-10	2.15e-09	DNAJB4	sp|Q2KIT4|DNJB4_BOVIN DnaJ homolog subfamily B member 4 OS=Bos taurus GN=DNAJB4 PE=2 SV=1//1.09253e-38	GO:0005737//GO:0005634//GO:0005886	GO:0031072//GO:0051082//GO:0005515	GO:0006457
GOAT_ENSBTAP00000029003	2009	2596	2132	994	977	1118	973.593	1274.65	1176.41	438.519	427.948	487.009	2245.67	1029.67	1141.55	451.159	-1.33929	6.92e-11	6.52e-10	NDUFB2	sp|Q02374|NDUB2_BOVIN NADH dehydrogenase [ubiquinone] 1 beta subcomplex subunit 2, mitochondrial OS=Bos taurus GN=NDUFB2 PE=1 SV=1//2.78843e-48	GO:0016020//GO:0005739//GO:0005743//GO:0005747//GO:0070469	--	GO:0022900
GOAT_ENSBTAP00000029010	26	17	14	289	350	388	1.87229	1.24033	1.14789	18.9453	22.7807	25.1148	19	342.333	1.42017	22.2803	3.97163	3.5e-27	4.79e-25	GLRB	sp|P48167|GLRB_HUMAN Glycine receptor subunit beta OS=Homo sapiens GN=GLRB PE=1 SV=1//1.10072e-08	GO:0016021//GO:0016020//GO:0045211	GO:0005488//GO:0016934//GO:0016933//GO:0016594//GO:0005230//GO:0005515//GO:0005216	GO:0042391//GO:0006821//GO:0050905//GO:0007218//GO:0007340//GO:0001964//GO:0006811//GO:0060013//GO:0060012//GO:0006810//GO:0007601//GO:0007628//GO:0007268//GO:0007399
GOAT_ENSBTAP00000029033	42	49	34	214	215	234	3.28145	3.87884	3.0246	15.2207	15.1829	16.4335	41.6667	221	3.39496	15.6124	2.20122	1.33e-07	6.98e-07	SEPN1	sp|Q9NZV5|SELN_HUMAN Selenoprotein N OS=Homo sapiens GN=SEPN1 PE=1 SV=5//8.79051e-08	--	GO:0005515	--
GOAT_ENSBTAP00000029040	93	71	45	339	358	341	9.50178	7.3497	5.23489	31.5302	33.0601	31.3166	69.6667	346	7.36212	31.9689	2.11848	3.94e-08	2.27e-07	PAQR7	sp|Q865K8|MPRA_PIG Membrane progestin receptor alpha OS=Sus scrofa GN=PAQR7 PE=2 SV=1//0	GO:0016021	GO:0004872	--
GOAT_ENSBTAP00000029147	1150	1395	1192	652	629	703	332.587	408.762	392.516	171.656	164.421	182.751	1245.67	661.333	377.955	172.943	-1.12792	4.33e-12	5.12e-11	TXNDC17	sp|Q9BRA2|TXD17_HUMAN Thioredoxin domain-containing protein 17 OS=Homo sapiens GN=TXNDC17 PE=1 SV=1//5.77866e-17	GO:0005829	GO:0047134//GO:0005515//GO:0004601//GO:0009055	GO:0033209
GOAT_ENSBTAP00000029204	11	10	11	149	178	204	0.370053	0.340848	0.421345	4.56313	5.41241	6.16879	10.6667	177	0.377416	5.38144	3.83377	3.03e-18	1.07e-16	KIAA0319	sp|Q5VV43|K0319_HUMAN Dyslexia-associated protein KIAA0319 OS=Homo sapiens GN=KIAA0319 PE=1 SV=1//0	GO:0005769//GO:0005886	GO:0005515	GO:0001764//GO:2000171
GOAT_ENSBTAP00000029212	18	21	20	154	195	203	1.81322	2.14332	2.29394	14.1223	17.7547	18.3812	19.6667	184	2.0835	16.7527	3.00732	9.95e-13	1.33e-11	Dusp7	sp|Q91Z46|DUS7_MOUSE Dual specificity protein phosphatase 7 OS=Mus musculus GN=Dusp7 PE=2 SV=4//0	GO:0005829	GO:0016787//GO:0051019//GO:0016791//GO:0008138//GO:0004725//GO:0004721//GO:0017017//GO:0005515	GO:0016311//GO:0006470//GO:0000188//GO:0043407//GO:0035335
GOAT_ENSBTAP00000029213	70	30	24	303	251	237	1.896	0.823287	0.74016	7.47117	6.14489	5.77015	41.3333	263.667	1.15315	6.46207	2.48642	3.15e-10	2.64e-09	PTPRG	sp|P23470|PTPRG_HUMAN Receptor-type tyrosine-protein phosphatase gamma OS=Homo sapiens GN=PTPRG PE=1 SV=4//1.08227e-09	--	GO:0016787//GO:0016791//GO:0004725//GO:0004721//GO:0005515//GO:0042802	GO:0016311//GO:0006470//GO:0035335
GOAT_ENSBTAP00000029225	27	22	21	193	169	177	1.61917	1.33672	1.43391	10.5363	9.16038	9.54111	23.3333	179.667	1.46326	9.74595	2.73561	1.56e-10	1.38e-09	SEMA4C	sp|Q9C0C4|SEM4C_HUMAN Semaphorin-4C OS=Homo sapiens GN=SEMA4C PE=1 SV=2//3.06592e-13	GO:0016020//GO:0030672//GO:0014069	GO:0005515//GO:0004872	GO:0021535//GO:0042692//GO:0071526//GO:0032874//GO:0001843//GO:0021549//GO:0007275
GOAT_ENSBTAP00000029241	29	29	22	301	295	295	1.70489	1.72737	1.47264	16.1091	15.6755	15.589	26.6667	297	1.63497	15.7912	3.27179	1.55e-18	5.67e-17	RETSAT	sp|Q6NUM9|RETST_HUMAN All-trans-retinol 13,14-reductase OS=Homo sapiens GN=RETSAT PE=2 SV=2//0	GO:0005640//GO:0031965//GO:0005789	GO:0051786//GO:0016491	GO:0008152//GO:0042572//GO:0055114
GOAT_ENSBTAP00000029246	133	127	90	508	654	661	6.30898	6.1038	4.86097	21.9369	28.0404	28.1843	116.667	607.667	5.75791	26.0539	2.17788	2.65e-10	2.25e-09	ARHGAP44	sp|Q17R89|RHG44_HUMAN Rho GTPase-activating protein 44 OS=Homo sapiens GN=ARHGAP44 PE=1 SV=1//0	GO:0005737//GO:0005622	GO:0005515	GO:0007165
GOAT_ENSBTAP00000029256	3528	3514	3141	2381	2077	2005	559.821	564.952	567.495	343.942	297.89	285.978	3394.33	2154.33	564.089	309.27	-0.867056	3.34e-14	5.83e-13		sp|Q5R8I2|CN166_PONAB UPF0568 protein C14orf166 homolog OS=Pongo abelii PE=2 SV=1//1.37407e-136	GO:0072669//GO:0005634	GO:0005515//GO:0000993//GO:0042802	GO:0045944
GOAT_ENSBTAP00000029270	22	10	10	187	218	188	1.52308	0.701437	0.788266	11.7854	13.6413	11.6992	14	197.667	1.00426	12.3753	3.62326	1.14e-17	3.66e-16	RIC8B	sp|Q9NVN3|RIC8B_HUMAN Synembryn-B OS=Homo sapiens GN=RIC8B PE=1 SV=2//0	GO:0005737//GO:0005813//GO:0005829//GO:0005886	GO:0001965//GO:0005488	GO:0008277
GOAT_ENSBTAP00000029284	2354	2353	2482	1656	1420	1673	659.516	667.929	791.761	422.361	359.589	421.321	2396.33	1583	706.402	401.09	-0.816562	4.85e-12	5.67e-11	SUB1	sp|Q5R6D0|TCP4_PONAB Activated RNA polymerase II transcriptional coactivator p15 OS=Pongo abelii GN=SUB1 PE=2 SV=1//2.33889e-17	GO:0005730//GO:0005634//GO:0005667	GO:0005515//GO:0003713//GO:0003677//GO:0003697	GO:0006355//GO:0006357
GOAT_ENSBTAP00000029285	101	56	42	331	313	272	1.81101	1.01736	0.857475	5.40296	5.07274	4.38395	66.3333	305.333	1.22862	4.95322	2.01133	6.78e-07	3.15e-06	SYNE2	sp|Q8WXH0|SYNE2_HUMAN Nesprin-2 OS=Homo sapiens GN=SYNE2 PE=1 SV=3//0	GO:0030016//GO:0031527//GO:0005925//GO:0030018//GO:0005737//GO:0031981//GO:0016021//GO:0005635//GO:0031258//GO:0031965//GO:0034993//GO:0016529//GO:0044429//GO:0005634	GO:0003779//GO:0005515	GO:0034504//GO:0031022//GO:0007163//GO:0090286//GO:0010761//GO:0030335//GO:0051642//GO:0006998//GO:0007097
GOAT_ENSBTAP00000029367	768	945	736	388	353	412	331.827	413.687	362.078	152.612	137.856	160.01	816.333	384.333	369.197	150.159	-1.2979	2.71e-13	4e-12	GNB1L	sp|Q9BYB4|GNB1L_HUMAN Guanine nucleotide-binding protein subunit beta-like protein 1 OS=Homo sapiens GN=GNB1L PE=1 SV=2//2.17992e-39	GO:0005737	GO:0005515	GO:0035176
GOAT_ENSBTAP00000029400	180	176	114	715	877	821	6.04408	5.98769	4.35849	21.8559	26.6168	24.7799	156.667	804.333	5.46342	24.4175	2.16004	1.09e-10	9.96e-10	SPECC1L	sp|Q2KNA0|CYTSA_CANFA Cytospin-A OS=Canis familiaris GN=SPECC1L PE=2 SV=1//2.93842e-07	GO:0031941//GO:0015630//GO:0005815//GO:0015629	GO:0005515//GO:0046983	GO:0030835//GO:0007026//GO:0030036//GO:0016477
GOAT_ENSBTAP00000029454	64	52	49	533	591	593	1.91581	1.57712	1.6701	14.5246	15.9904	15.956	55	572.333	1.72101	15.4903	3.17004	1.28e-22	9.31e-21	MTMR3	sp|Q13615|MTMR3_HUMAN Myotubularin-related protein 3 OS=Homo sapiens GN=MTMR3 PE=1 SV=3//0
GOAT_ENSBTAP00000029458	1275	2249	1756	511	688	664	550.885	984.531	863.871	200.991	268.682	257.88	1760	621	799.762	242.517	-1.72148	1.03e-05	3.84e-05	DDT	sp|A5PK65|DOPD_BOVIN D-dopachrome decarboxylase OS=Bos taurus GN=DDT PE=3 SV=1//3.72069e-53	GO:0005737	GO:0033981//GO:0016829	GO:0042438
GOAT_ENSBTAP00000029468	3756	4385	3179	1973	1642	1866	2172.52	2569.78	2093.64	1038.89	858.439	970.168	3773.33	1827	2278.64	955.832	-1.25335	3.5e-15	7.23e-14	CHCHD10	sp|Q8WYQ3|CHC10_HUMAN Coiled-coil-helix-coiled-coil-helix domain-containing protein 10, mitochondrial OS=Homo sapiens GN=CHCHD10 PE=1 SV=1//1.39004e-22	GO:0005739	--	GO:2000984//GO:0006754//GO:0006119
GOAT_ENSBTAP00000029514	69	41	35	254	286	299	12.8877	7.75891	7.44336	43.1883	48.2828	50.1992	48.3333	279.667	9.36334	47.2235	2.33441	2.47e-09	1.77e-08	Rab35	sp|Q5U316|RAB35_RAT Ras-related protein Rab-35 OS=Rattus norvegicus GN=Rab35 PE=2 SV=1//2.0349e-19	GO:0005737//GO:0045171//GO:0016020//GO:0005739//GO:0031253//GO:0045334//GO:0005886//GO:0005622//GO:0005634//GO:0005905	GO:0000166//GO:0005546//GO:0005525//GO:0003924//GO:0019003	GO:0008104//GO:0007165//GO:0006886//GO:0000910//GO:0006913//GO:0006184//GO:0007264//GO:0016197//GO:0015031
GOAT_ENSBTAP00000029529	109	135	119	716	619	520	4.91069	6.16224	6.1043	29.3653	25.2061	21.058	121	618.333	5.72575	25.2098	2.13845	4.42e-10	3.62e-09	TPCN1	sp|Q9ULQ1|TPC1_HUMAN Two pore calcium channel protein 1 OS=Homo sapiens GN=TPCN1 PE=1 SV=3//0	GO:0016020//GO:0005765//GO:0016021//GO:0010008	GO:0072345//GO:0005216//GO:0005515//GO:0042802	GO:0006810//GO:0006811//GO:0055085
GOAT_ENSBTAP00000029564	272	153	100	1330	1507	1509	17.3565	9.89175	7.26551	77.259	86.9171	86.5526	175	1448.67	11.5046	83.5762	2.86088	3.62e-22	2.48e-20	SVOP	sp|Q1JP63|SVOP_BOVIN Synaptic vesicle 2-related protein OS=Bos taurus GN=SVOP PE=2 SV=1//0	GO:0030672//GO:0031410//GO:0016021//GO:0016020//GO:0045202//GO:0030054	GO:0015075//GO:0022857	GO:0006810//GO:0034220//GO:0055085
GOAT_ENSBTAP00000029933	58	42	44	388	406	341	1.71191	1.256	1.4787	10.4253	10.8312	9.04701	48	378.333	1.4822	10.1012	2.76871	4.89e-15	9.78e-14	PPFIA1	sp|Q13136|LIPA1_HUMAN Liprin-alpha-1 OS=Homo sapiens GN=PPFIA1 PE=1 SV=1//0	--	GO:0005515	--
GOAT_ENSBTAP00000030280	231	217	175	1849	1991	1894	24.5817	23.3963	21.2036	179.119	191.5	181.166	207.667	1911.33	23.0605	183.928	2.99565	6.57e-26	7.45e-24	HEPACAM	sp|A4FUY1|HECAM_BOVIN Hepatocyte cell adhesion molecule OS=Bos taurus GN=HEPACAM PE=2 SV=1//4.3854e-10	GO:0005737//GO:0016020//GO:0005911//GO:0016021//GO:0030424	GO:0004872//GO:0005515	GO:0034613//GO:0007050//GO:0007155//GO:0040008//GO:0007049
GOAT_ENSBTAP00000030425	20	16	13	183	209	194	0.336412	0.272679	0.248977	2.80219	3.17751	2.9332	16.3333	195.333	0.286022	2.97097	3.37673	8.88e-16	2.02e-14	RNF213	sp|Q63HN8|RN213_HUMAN E3 ubiquitin-protein ligase RNF213 OS=Homo sapiens GN=RNF213 PE=1 SV=3//1.97137e-06	GO:0005737	GO:0016887//GO:0017111//GO:0000166//GO:0008270//GO:0005515//GO:0046872//GO:0004842//GO:0005524	GO:0006200//GO:0016567//GO:0051865
GOAT_ENSBTAP00000030712	24	10	5	258	271	281	3.23563	1.36596	0.767522	31.6644	33.0229	34.0527	13	270	1.7897	32.9134	4.20088	6.43e-26	7.32e-24	Synpr	sp|P22831|SYNPR_RAT Synaptoporin OS=Rattus norvegicus GN=Synpr PE=2 SV=2//1.72832e-16	GO:0016020//GO:0016021//GO:0008021	GO:0005215	GO:0006810
GOAT_ENSBTAP00000030995	37	23	35	233	242	214	0.64884	0.408651	0.698839	3.7196	3.83575	3.37324	31.6667	229.667	0.585443	3.64286	2.63747	3.31e-11	3.33e-10	HEATR5A	sp|Q86XA9|HTR5A_HUMAN HEAT repeat-containing protein 5A OS=Homo sapiens GN=HEATR5A PE=1 SV=2//9.03216e-16	--	GO:0005488	--
GOAT_ENSBTAP00000031013	327	165	186	1345	1134	1093	27.6574	14.1396	17.9122	103.56	86.6913	83.0962	226	1190.67	19.9031	91.1157	2.19471	7.79e-12	8.8e-11	ENOSF1	sp|Q2KIA9|ENOF1_BOVIN Mitochondrial enolase superfamily member 1 OS=Bos taurus GN=ENOSF1 PE=2 SV=1//3.02377e-29	GO:0005739	GO:0016853//GO:0003824//GO:0046872	GO:0009063//GO:0008152
GOAT_ENSBTAP00000031119	2097	1662	1772	1462	1252	1404	420.121	337.362	404.216	266.642	226.715	252.837	1843.67	1372.67	387.233	248.731	-0.638614	1.31e-10	1.18e-09	Rac3	sp|P60764|RAC3_MOUSE Ras-related C3 botulinum toxin substrate 3 OS=Mus musculus GN=Rac3 PE=1 SV=1//2.09478e-07	GO:0031941//GO:0016020//GO:0030426//GO:0005622//GO:0043005//GO:0043025//GO:0012505	GO:0005525//GO:0005515//GO:0000166//GO:0003924	GO:0050885//GO:0030031//GO:0031175//GO:0030036//GO:0007165//GO:0050905//GO:0015031//GO:0006184//GO:0007264
GOAT_ENSBTAP00000031225	102	56	37	365	388	396	4.03739	2.24584	1.66754	13.1522	13.8813	14.0894	65	383	2.65026	13.7077	2.37078	1.11e-10	1.01e-09	PARG	sp|O02776|PARG_BOVIN Poly(ADP-ribose) glycohydrolase OS=Bos taurus GN=PARG PE=1 SV=1//8.40514e-08	GO:0043231//GO:0005634//GO:0005829	GO:0004649	GO:0005975//GO:0016045//GO:0006974
GOAT_ENSBTAP00000031396	1811	2089	1941	932	827	714	349.168	408.078	426.103	163.582	144.119	123.741	1947	824.333	394.45	143.814	-1.45564	1.46e-15	3.21e-14	DUT	sp|P33316|DUT_HUMAN Deoxyuridine 5&apos;-triphosphate nucleotidohydrolase, mitochondrial OS=Homo sapiens GN=DUT PE=1 SV=4//4.94394e-26	--	GO:0016787//GO:0004170	GO:0046080
GOAT_ENSBTAP00000031479	13	13	11	276	335	320	0.709589	0.718946	0.683643	13.7144	16.5275	15.7004	12.3333	310.333	0.704059	15.3141	4.44302	1.4e-30	2.84e-28	SLC9A6	sp|Q92581|SL9A6_HUMAN Sodium/hydrogen exchanger 6 OS=Homo sapiens GN=SLC9A6 PE=1 SV=2//0	GO:0016021//GO:0055038//GO:0005739//GO:0005886//GO:0005789//GO:0031901	GO:0015297//GO:0015299//GO:0015385	GO:0006812//GO:0006811//GO:0006810//GO:0006814//GO:0006885//GO:0055085
GOAT_ENSBTAP00000031689	46	116	40	417	625	561	0.860527	2.19864	0.852001	7.10146	10.5678	9.43339	67.3333	534.333	1.30372	9.03423	2.79276	5.28e-08	2.97e-07	PEG3	sp|Q6H236|PEG3_BOVIN Paternally-expressed gene 3 protein OS=Bos taurus GN=PEG3 PE=2 SV=1//6.9596e-06	GO:0005737//GO:0005634//GO:0005622	GO:0003700//GO:0008270//GO:0046872//GO:0003676	GO:0001701//GO:0071514//GO:0016032//GO:0006355//GO:0035264//GO:0010468
GOAT_ENSBTAP00000031700	7902	7837	7219	4288	3881	3797	2083.66	2093.77	2167.41	1029.32	924.981	899.971	7652.67	3988.67	2114.95	951.424	-1.15246	2.61e-19	1.09e-17	Rpl28	sp|P41105|RL28_MOUSE 60S ribosomal protein L28 OS=Mus musculus GN=Rpl28 PE=1 SV=2//1.76486e-11	GO:0005737//GO:0005840//GO:0022625//GO:0030529//GO:0005622	GO:0003735//GO:0005515	GO:0006412
GOAT_ENSBTAP00000031798	476	657	713	133	229	157	31.2068	43.6412	53.2236	7.93776	13.5699	9.25208	615.333	173	42.6905	10.2532	-2.05784	2.13e-07	1.08e-06	AIRE	sp|O43918|AIRE_HUMAN Autoimmune regulator OS=Homo sapiens GN=AIRE PE=1 SV=1//1.04385e-163	GO:0005737//GO:0015629//GO:0005634//GO:0005622//GO:0005886//GO:0044424	GO:0044212//GO:0046872//GO:0003677//GO:0003682//GO:0042393//GO:0005515//GO:0045182//GO:0042802//GO:0008270	GO:0006355//GO:0045944//GO:0045893//GO:0006417//GO:0006959
GOAT_ENSBTAP00000031879	93	35	42	604	693	625	5.21113	1.98704	2.67961	30.8099	35.0979	31.4794	56.6667	640.667	3.29259	32.4624	3.30147	4.53e-25	4.78e-23	PLS3	sp|A7E3Q8|PLST_BOVIN Plastin-3 OS=Bos taurus GN=PLS3 PE=2 SV=1//0	GO:0005737	GO:0003779//GO:0005509//GO:0005515	--
GOAT_ENSBTAP00000031895	38	8	21	493	528	544	1.87447	0.399829	1.17947	22.1384	23.5411	24.1208	22.3333	521.667	1.15126	23.2668	4.33699	1.81e-37	8.73e-35	PLOD2	sp|O00469|PLOD2_HUMAN Procollagen-lysine,2-oxoglutarate 5-dioxygenase 2 OS=Homo sapiens GN=PLOD2 PE=1 SV=2//0	GO:0005783	GO:0031418//GO:0016706//GO:0016705//GO:0005506//GO:0008475//GO:0016491	GO:0001666//GO:0055114
GOAT_ENSBTAP00000031949	2980	4065	3619	1529	1996	1566	1257.26	1737.64	1738.49	587.249	761.149	593.881	3554.67	1697	1577.8	647.427	-1.28512	8.44e-08	4.57e-07	CPI17	sp|O18734|PP14A_PIG Protein phosphatase 1 regulatory subunit 14A OS=Sus scrofa GN=CPI17 PE=1 SV=1//3.42735e-26	GO:0005737	--	GO:0042325
GOAT_ENSBTAP00000032011	81	72	44	556	532	556	2.39867	2.16026	1.48358	14.9887	14.2395	14.7999	65.6667	548	2.01417	14.676	2.86521	4.6e-18	1.57e-16	CHL1	sp|O00533|CHL1_HUMAN Neural cell adhesion molecule L1-like protein OS=Homo sapiens GN=CHL1 PE=1 SV=4//2.76908e-06	GO:0045177//GO:0030425	GO:0002020//GO:0005515	GO:0050890//GO:0007610//GO:0035640//GO:0043524//GO:0001764//GO:0031175//GO:0007411//GO:0008344
GOAT_ENSBTAP00000032251	284	164	199	913	836	950	37.3065	21.8273	29.7641	109.18	99.2594	112.173	215.667	899.667	29.6326	106.871	1.85061	1.44e-07	7.51e-07	Nqo1	sp|P05982|NQO1_RAT NAD(P)H dehydrogenase [quinone] 1 OS=Rattus norvegicus GN=Nqo1 PE=1 SV=4//2.65988e-30	GO:0005737	GO:0003955//GO:0005515	GO:0006979//GO:0043086
GOAT_ENSBTAP00000032319	20	11	15	212	245	220	1.13128	0.630408	0.96606	10.9164	12.5258	11.1856	15.3333	225.667	0.909249	11.5426	3.66615	1.52e-19	6.61e-18	TBC1D23	sp|Q9NUY8|TBC23_HUMAN TBC1 domain family member 23 OS=Homo sapiens GN=TBC1D23 PE=1 SV=3//0	GO:0005622	GO:0005097	GO:0032313//GO:0050727//GO:0032680//GO:0032851//GO:0032755
GOAT_ENSBTAP00000032337	14	3	7	153	173	129	0.451089	0.0979364	0.256806	4.48776	5.03824	3.73613	8	151.667	0.26861	4.42071	4.04069	1.13e-17	3.62e-16	CRYBG3	sp|Q68DQ2|CRBG3_HUMAN Beta/gamma crystallin domain-containing protein 3 OS=Homo sapiens GN=CRYBG3 PE=2 SV=2//0
GOAT_ENSBTAP00000032456	180	76	86	655	640	705	52.9105	22.6346	28.7833	175.273	170.039	186.276	114	666.667	34.7761	177.196	2.34918	2.16e-12	2.69e-11	YPEL5	sp|Q4R4Q6|YPEL5_MACFA Protein yippee-like 5 OS=Macaca fascicularis GN=YPEL5 PE=2 SV=1//9.40535e-25	--	GO:0008113	GO:0055114
GOAT_ENSBTAP00000032885	51	26	21	398	380	384	3.39321	1.75268	1.59086	24.1062	22.8519	22.9652	32.6667	387.333	2.24558	23.3078	3.37565	9.11e-22	5.76e-20	ZNF512	sp|A4FV61|ZN512_BOVIN Zinc finger protein 512 OS=Bos taurus GN=ZNF512 PE=2 SV=1//2.32496e-90	GO:0005634//GO:0005622	GO:0008270//GO:0003677//GO:0046872	GO:0006355//GO:0006351
GOAT_ENSBTAP00000033015	16805	18045	18346	10005	8239	8977	3074.76	3345.18	3821.97	1666.46	1362.53	1476.39	17732	9073.67	3413.97	1501.79	-1.18476	1.77e-13	2.72e-12	RPS27A	sp|P62979|RS27A_HUMAN Ubiquitin-40S ribosomal protein S27a OS=Homo sapiens GN=RPS27A PE=1 SV=2//4.53236e-80	GO:0005737//GO:0005840//GO:0005634//GO:0030529//GO:0005622//GO:0022627//GO:0015935	GO:0046872//GO:0003735//GO:0005515	GO:0006412
GOAT_ENSBTAP00000033171	82	39	27	294	346	410	9.42515	4.5418	3.53355	30.7628	35.9459	42.36	49.3333	350	5.8335	36.3563	2.63977	4.91e-10	3.99e-09	MANEAL	sp|Q5VSG8|MANEL_HUMAN Glycoprotein endo-alpha-1,2-mannosidase-like protein OS=Homo sapiens GN=MANEAL PE=2 SV=1//1.86183e-14
GOAT_ENSBTAP00000033188	792	663	582	3398	3288	3641	3.89607	3.30449	3.25985	15.217	14.6195	16.0998	679	3442.33	3.4868	15.3121	2.1347	2.47e-12	3.05e-11	MACF1	sp|Q9UPN3|MACF1_HUMAN Microtubule-actin cross-linking factor 1, isoforms 1/2/3/5 OS=Homo sapiens GN=MACF1 PE=1 SV=4//1.72025e-06	GO:0005856//GO:0005794//GO:0015630//GO:0005737//GO:0005886//GO:0005874//GO:0032587//GO:0015629	GO:0005515//GO:0008017//GO:0003779//GO:0005509//GO:0003676	GO:0001707//GO:0016055//GO:0006620//GO:0006928//GO:0007050//GO:0043001//GO:0007163//GO:0032886
GOAT_ENSBTAP00000033249	2346	2699	2022	1637	1768	1646	70.1093	81.7222	68.8022	44.535	47.7561	44.2156	2355.67	1683.67	73.5446	45.5022	-0.692681	2.25e-11	2.34e-10	SCAP	sp|A6QM06|SCAP_BOVIN Sterol regulatory element-binding protein cleavage-activating protein OS=Bos taurus GN=SCAP PE=2 SV=1//0
GOAT_ENSBTAP00000033613	60	47	54	323	339	340	3.9626	3.14497	4.06066	19.4194	20.2362	20.1839	53.6667	334	3.72274	19.9465	2.4217	5.18e-11	5.04e-10	FKBP9	sp|Q2KJC8|FKBP9_BOVIN Peptidyl-prolyl cis-trans isomerase FKBP9 OS=Bos taurus GN=FKBP9 PE=2 SV=1//6.30193e-06	GO:0016020//GO:0005783	GO:0016853//GO:0005528//GO:0005509//GO:0003755	GO:0000413//GO:0006457//GO:0018208
GOAT_ENSBTAP00000033741	16	11	15	150	235	191	0.706631	0.492215	0.754289	6.03072	9.3808	7.58236	14	192	0.651045	7.66463	3.55739	8.44e-13	1.14e-11	Rapgef5	sp|Q8C0Q9|RPGF5_MOUSE Rap guanine nucleotide exchange factor 5 OS=Mus musculus GN=Rapgef5 PE=2 SV=2//2.48737e-06	GO:0005622	GO:0005085	GO:0051056//GO:0035556//GO:0007264
GOAT_ENSBTAP00000033805	40	75	53	406	474	385	1.48495	2.821	2.24027	13.7209	15.9048	12.8473	56	421.667	2.18207	14.1577	2.69781	5.74e-15	1.13e-13	KIF5B	sp|P33176|KINH_HUMAN Kinesin-1 heavy chain OS=Homo sapiens GN=KIF5B PE=1 SV=1//0	GO:0005737//GO:0043005//GO:0035253//GO:0031982//GO:0043227//GO:0005874	GO:0005515//GO:0000166//GO:0003777//GO:0005524	GO:0042391//GO:0007028//GO:0007018//GO:0090004//GO:0035617//GO:0043268
GOAT_ENSBTAP00000033909	18	2	10	157	248	200	1.07049	0.120512	0.67715	8.49995	13.331	10.6915	10	201.667	0.622719	10.8408	4.12175	4.43e-14	7.58e-13	Klhl20	sp|Q8VCK5|KLH20_MOUSE Kelch-like protein 20 OS=Mus musculus GN=Klhl20 PE=2 SV=2//0	GO:0005737//GO:0005794//GO:0016605//GO:0005634//GO:0044444//GO:0048471//GO:0031463//GO:0009986	GO:0019964//GO:0003779//GO:0005515//GO:0004842	GO:0043161//GO:0016567//GO:0043066
GOAT_ENSBTAP00000033917	80	53	48	415	435	432	8.77347	5.88906	5.99371	41.4318	43.1191	42.5856	60.3333	427.333	6.88541	42.3788	2.62173	5.85e-14	9.8e-13	SLC39A1	sp|Q3SYU3|S39A1_BOVIN Zinc transporter ZIP1 OS=Bos taurus GN=SLC39A1 PE=2 SV=1//4.07568e-168	GO:0016020//GO:0016021//GO:0005886	GO:0005385//GO:0046873	GO:0006811//GO:0006810//GO:0030001//GO:0071577//GO:0006829//GO:0055085
GOAT_ENSBTAP00000034197	56	51	42	344	346	339	1.8076	1.66792	1.54361	10.1083	10.0946	9.83587	49.6667	343	1.67304	10.0129	2.58132	1.45e-12	1.88e-11	PLEKHA7	sp|Q6IQ23|PKHA7_HUMAN Pleckstrin homology domain-containing family A member 7 OS=Homo sapiens GN=PLEKHA7 PE=1 SV=2//0	GO:0005737//GO:0005813//GO:0005634//GO:0005915//GO:0030054	GO:0005543//GO:0070097//GO:0005515	GO:0045218//GO:0090136
GOAT_ENSBTAP00000034269	21185	21120	13233	12701	8192	6992	12253.7	12377.1	8715.03	6687.75	4282.79	3635.27	18512.7	9295	11115.3	4868.6	-1.19096	2.64e-11	2.71e-10		-//-	GO:0005737//GO:0005634//GO:0048471	GO:0008270//GO:0046872	GO:0071294//GO:0045926
GOAT_ENSBTAP00000034279	1593	1901	1467	768	726	807	627.774	759.03	658.25	275.52	258.597	285.864	1653.67	767	681.685	273.327	-1.31848	1.42e-15	3.12e-14	TIMM10	sp|Q2NKR1|TIM10_BOVIN Mitochondrial import inner membrane translocase subunit Tim10 OS=Bos taurus GN=TIMM10 PE=3 SV=1//8.61713e-08	GO:0016020//GO:0005743//GO:0042719//GO:0005739	GO:0046872	GO:0006626//GO:0006810//GO:0045039//GO:0015031
GOAT_ENSBTAP00000034398	14	12	22	233	251	214	0.491254	0.426627	0.87897	7.44284	7.96069	6.74978	16	232.667	0.59895	7.38444	3.62398	8.98e-20	4.09e-18	HLTF	sp|Q14527|HLTF_HUMAN Helicase-like transcription factor OS=Homo sapiens GN=HLTF PE=1 SV=2//0	GO:0005634	GO:0016818//GO:0016887//GO:0005515//GO:0004386//GO:0008270//GO:0003676//GO:0003677//GO:0046872//GO:0005524	GO:0006200//GO:0006357
GOAT_ENSBTAP00000034422	84	61	49	433	326	348	5.44732	4.00796	3.61804	25.5621	19.1082	20.2853	64.6667	369	4.35777	21.6519	2.31283	3.82e-10	3.16e-09	Sesn1	sp|P58006|SESN1_MOUSE Sestrin-1 OS=Mus musculus GN=Sesn1 PE=2 SV=3//0	GO:0005634	--	GO:0007050
GOAT_ENSBTAP00000034443	32	25	24	309	319	263	1.05282	0.833358	0.899057	9.25477	9.4862	7.77779	27	297	0.92841	8.83959	3.25114	2.39e-18	8.55e-17	Ankrd28	sp|Q505D1|ANR28_MOUSE Serine/threonine-protein phosphatase 6 regulatory ankyrin repeat subunit A OS=Mus musculus GN=Ankrd28 PE=1 SV=1//9.73399e-06	--	GO:0005515	--
GOAT_ENSBTAP00000034680	161	66	113	569	590	450	5.27761	2.19202	4.21758	16.9797	17.4809	13.2593	113.333	536.333	3.89574	15.9066	2.02966	4.82e-08	2.74e-07	FAM214A	sp|Q32MH5|F214A_HUMAN Protein FAM214A OS=Homo sapiens GN=FAM214A PE=2 SV=2//0
GOAT_ENSBTAP00000034697	59	29	37	907	1009	957	3.44598	1.71612	2.46057	48.2251	53.2661	50.2424	41.6667	957.667	2.54089	50.5779	4.3151	1.12e-45	1.48e-42	Picalm	sp|Q7M6Y3|PICA_MOUSE Phosphatidylinositol-binding clathrin assembly protein OS=Mus musculus GN=Picalm PE=1 SV=1//0
GOAT_ENSBTAP00000034759	957	1080	1020	637	656	647	50.7685	58.0491	61.6106	30.7628	31.4547	30.8521	1019	646.667	56.8094	31.0232	-0.872782	1.88e-11	1.98e-10	INTS10	sp|Q9NVR2|INT10_HUMAN Integrator complex subunit 10 OS=Homo sapiens GN=INTS10 PE=1 SV=2//2.49895e-10	GO:0005737//GO:0005634//GO:0032039	GO:0005515	GO:0016180
GOAT_ENSBTAP00000034833	5	3	5	103	91	101	3.47637	1.98188	3.71201	61.1376	53.6299	59.1951	4.33333	98.3333	3.05675	57.9875	4.24793	6.43e-17	2.54e-15	MZT1	sp|Q08AG7|MZT1_HUMAN Mitotic-spindle organizing protein 1 OS=Homo sapiens GN=MZT1 PE=1 SV=2//4.12588e-27	GO:0005813//GO:0005819//GO:0008274	GO:0005515	GO:0033566
GOAT_ENSBTAP00000035017	1230	1329	1108	719	680	783	397.385	435.031	407.586	211.466	198.57	227.387	1222.33	727.333	413.334	212.474	-0.960019	6.41e-15	1.26e-13	Emc6	sp|Q9CQW0|EMC6_MOUSE ER membrane protein complex subunit 6 OS=Mus musculus GN=Emc6 PE=2 SV=1//2.66739e-38	GO:0016021//GO:0072546	--	--
GOAT_ENSBTAP00000035027	259	169	79	1180	1333	1456	76.1323	50.3321	26.4405	315.759	354.159	384.706	169	1323	50.9683	351.541	2.78602	3.1e-20	1.5e-18		-//-
GOAT_ENSBTAP00000035058	21	18	6	170	216	211	2.6149	2.2709	0.85067	19.2704	24.3102	23.6166	15	199	1.91216	22.3991	3.55016	4.66e-17	1.33e-15	Doc2b	sp|P70610|DOC2B_RAT Double C2-like domain-containing protein beta OS=Rattus norvegicus GN=Doc2b PE=1 SV=2//0	GO:0005737//GO:0015630//GO:0005886	GO:0019905//GO:0005515	GO:0032024//GO:0008104//GO:0048791
GOAT_ENSBTAP00000035133	63	21	34	276	272	272	5.52391	1.86558	3.39436	22.0303	21.5563	21.4374	39.3333	273.333	3.59462	21.6747	2.5921	1.69e-11	1.8e-10	Etf1	sp|Q5U2Q7|ERF1_RAT Eukaryotic peptide chain release factor subunit 1 OS=Rattus norvegicus GN=Etf1 PE=2 SV=3//1.64692e-22	GO:0005737	GO:0016149//GO:0005515	GO:0006479//GO:0000184//GO:0006415//GO:0006412
GOAT_ENSBTAP00000035199	117	139	98	697	747	616	4.0657	4.89388	3.87747	22.0489	23.4622	19.241	118	686.667	4.27902	21.584	2.33461	1.75e-12	2.22e-11	MCF2L	sp|O15068|MCF2L_HUMAN Guanine nucleotide exchange factor DBS OS=Homo sapiens GN=MCF2L PE=1 SV=2//0	GO:0030027//GO:0016020//GO:0005622	GO:0005089//GO:0005543//GO:0005085//GO:0005545//GO:0005515	GO:0045944//GO:0035023//GO:0007266//GO:0035556
GOAT_ENSBTAP00000035273	171	112	104	687	644	730	5.17059	3.43124	3.58056	18.9106	17.6007	19.8411	129	687	4.0608	18.7841	2.20968	6.31e-11	6.01e-10	Ctr9	sp|Q62018|CTR9_MOUSE RNA polymerase-associated protein CTR9 homolog OS=Mus musculus GN=Ctr9 PE=1 SV=2//1.54878e-10	GO:0035327//GO:0016593//GO:0005634	GO:0042169//GO:0005515	GO:0001711//GO:0019827//GO:0071222//GO:0000122//GO:2001162//GO:0010390//GO:0007259//GO:0045638//GO:0045944//GO:0051571//GO:0033523//GO:0070102//GO:0032968//GO:0080182
GOAT_ENSBTAP00000035479	303	180	153	1034	959	884	29.6078	17.8207	17.0227	91.9789	84.6995	77.6449	212	959	21.4837	84.7744	1.98039	7.54e-09	4.96e-08	PHAX	sp|Q3MHI4|PHAX_BOVIN Phosphorylated adapter RNA export protein OS=Bos taurus GN=PHAX PE=2 SV=2//2.25944e-06	GO:0005737//GO:0005654//GO:0005634//GO:0015030	GO:0003723	GO:0006810//GO:0006408//GO:0015031
GOAT_ENSBTAP00000035493	41	32	48	307	329	308	0.512844	0.405546	0.683622	3.49578	3.7196	3.46298	40.3333	314.667	0.534004	3.55945	2.73673	6.85e-14	1.13e-12	FBN1	sp|P98133|FBN1_BOVIN Fibrillin-1 OS=Bos taurus GN=FBN1 PE=1 SV=1//0
GOAT_ENSBTAP00000035611	8	14	17	156	126	162	1.88745	3.34659	4.56675	33.5054	26.8692	34.3557	13	148	3.26693	31.5768	3.27286	4.6e-13	6.51e-12	Zfp36l1	sp|P23950|TISB_MOUSE Zinc finger protein 36, C3H1 type-like 1 OS=Mus musculus GN=Zfp36l1 PE=1 SV=1//2.46911e-77	GO:0005737//GO:0005634	GO:0005515//GO:0008270//GO:0003676//GO:0003729	GO:0001570//GO:0000288//GO:0033077//GO:0043488//GO:0006417
GOAT_ENSBTAP00000035795	1011	1456	1036	454	461	484	235.429	343.525	274.689	96.243	97.0305	101.31	1167.67	466.333	284.548	98.1944	-1.53496	2.18e-08	1.32e-07	ALKBH7	sp|Q2M2S8|ALKB7_BOVIN Alpha-ketoglutarate-dependent dioxygenase alkB homolog 7 OS=Bos taurus GN=ALKBH7 PE=2 SV=1//3.75778e-08	GO:0005737//GO:0005634//GO:0005739	GO:0016706//GO:0016702//GO:0046872//GO:0016491	GO:0055114
GOAT_ENSBTAP00000035894	296	138	137	1099	986	913	39.0258	18.4344	20.5662	131.905	117.5	108.2	190.333	999.333	26.0088	119.202	2.19633	1.97e-11	2.08e-10	CCND3	sp|Q3MHH5|CCND3_BOVIN G1/S-specific cyclin-D3 OS=Bos taurus GN=CCND3 PE=2 SV=1//4.88866e-07	GO:0000307//GO:0005634	GO:0005515//GO:0019901//GO:0004693	GO:0051726//GO:0000079//GO:0042098//GO:0045737//GO:0007165//GO:0051301//GO:0001934//GO:0007049
GOAT_ENSBTAP00000036305	1243	1572	1276	543	510	581	216.388	277.27	252.922	86.0531	80.2474	90.9151	1363.67	544.667	248.86	85.7385	-1.53732	1.98e-13	3e-12	EMC9	sp|Q9Y3B6|EMC9_HUMAN ER membrane protein complex subunit 9 OS=Homo sapiens GN=EMC9 PE=1 SV=3//1.03405e-138	GO:0005737//GO:0072546	--	--
GOAT_ENSBTAP00000036391	3478	5040	3321	1664	1537	1670	689.096	1011.74	749.191	300.129	275.247	297.416	3946.33	1623.67	816.677	290.931	-1.48909	1.42e-07	7.41e-07		sp|Q17Q97|CS060_BOVIN Uncharacterized protein C19orf60 homolog OS=Bos taurus PE=2 SV=1//3.7821e-16	--	GO:0005515	--
GOAT_ENSBTAP00000036510	140	124	108	504	551	558	5.51716	4.95106	4.84601	18.081	19.6263	19.766	124	537.667	5.10475	19.1578	1.90802	2.17e-07	1.1e-06	2017-03-06	sp|O60337|MARH6_HUMAN E3 ubiquitin-protein ligase MARCH6 OS=Homo sapiens GN=MARCH6 PE=1 SV=2//2.68105e-08	GO:0030176	GO:0031624//GO:0019899//GO:0008270//GO:0004842	GO:0016567//GO:0070936
GOAT_ENSBTAP00000036625	215	101	94	1511	1908	1714	14.0955	6.70891	7.01686	90.1802	113.063	101.007	136.667	1711	9.27375	101.417	3.451	5.43e-34	1.72e-31	Hmgcs1	sp|P17425|HMCS1_RAT Hydroxymethylglutaryl-CoA synthase, cytoplasmic OS=Rattus norvegicus GN=Hmgcs1 PE=1 SV=1//0	GO:0005737//GO:0005634//GO:0005886	GO:0004421//GO:0003824	GO:0008299//GO:0008152
GOAT_ENSBTAP00000036835	244	370	356	1291	1579	1402	8.33354	12.8036	13.844	40.1394	48.744	43.0413	323.333	1424	11.6604	43.9749	1.91507	1.13e-08	7.18e-08	DAAM2	sp|Q86T65|DAAM2_HUMAN Disheveled-associated activator of morphogenesis 2 OS=Homo sapiens GN=DAAM2 PE=2 SV=3//0	--	GO:0003779//GO:0017048//GO:0005488	GO:0016043//GO:0030036
GOAT_ENSBTAP00000036979	1476	1518	1234	988	949	970	397.982	414.704	378.849	242.515	231.282	235.097	1409.33	969	397.178	236.298	-0.749178	5.28e-12	6.15e-11	Bud31	sp|Q6PGH1|BUD31_MOUSE Protein BUD31 homolog OS=Mus musculus GN=Bud31 PE=2 SV=1//1.32242e-57	GO:0005634	--	--
GOAT_ENSBTAP00000037041	4146	4169	3748	3124	3238	3194	947.019	964.829	974.77	649.599	668.506	655.786	4021	3185.33	962.206	657.964	-0.548338	1.21e-09	9.12e-09	Rpl23a	sp|P62752|RL23A_RAT 60S ribosomal protein L23a OS=Rattus norvegicus GN=Rpl23a PE=2 SV=1//1.60099e-85	GO:0031932//GO:0005840//GO:0005634//GO:0030529//GO:0005622	GO:0000166//GO:0003735//GO:0003723//GO:0019843//GO:0003674	GO:0008150//GO:0006412
GOAT_ENSBTAP00000037064	1574	2040	1516	979	943	1040	240.196	315.414	263.411	136.003	130.068	142.657	1710	987.333	273.007	136.243	-1.00276	8.58e-09	5.59e-08	MOSPD3	sp|Q3T033|MSPD3_BOVIN Motile sperm domain-containing protein 3 OS=Bos taurus GN=MOSPD3 PE=2 SV=1//1.38543e-08	GO:0016021//GO:0016020	GO:0005515//GO:0005198	GO:0007507
GOAT_ENSBTAP00000037080	22	5	11	197	190	196	3.98462	0.917536	2.26845	32.4814	31.104	31.9093	12.6667	194.333	2.3902	31.8316	3.73525	2.22e-18	7.95e-17	RCAN1	sp|Q6XXM7|RCAN1_SHEEP Calcipressin-1 OS=Ovis aries GN=RCAN1 PE=2 SV=1//6.94567e-133	GO:0005737//GO:0005634	GO:0005515	GO:0043666//GO:0019722//GO:0048741
GOAT_ENSBTAP00000037099	82	74	64	431	525	501	13.1279	12.0033	11.6663	62.815	75.9695	72.0969	73.3333	485.667	12.2659	70.2938	2.51875	1.78e-13	2.74e-12	TPD52	sp|P55327|TPD52_HUMAN Tumor protein D52 OS=Homo sapiens GN=TPD52 PE=1 SV=2//2.77015e-14
GOAT_ENSBTAP00000037188	3591	3533	3193	2475	2163	2242	637.519	635.493	645.431	399.998	347.083	357.776	3439	2293.33	639.481	368.286	-0.796076	4.15e-13	5.94e-12	Vps28	sp|Q9D1C8|VPS28_MOUSE Vacuolar protein sorting-associated protein 28 homolog OS=Mus musculus GN=Vps28 PE=2 SV=1//8.19068e-114
GOAT_ENSBTAP00000037196	75	68	52	294	344	275	3.23271	2.96964	2.55201	11.5361	13.4018	10.6546	65	304.333	2.91812	11.8642	2.0235	3.87e-07	1.88e-06	Arhgap39	sp|P59281|RHG39_MOUSE Rho GTPase-activating protein 39 OS=Mus musculus GN=Arhgap39 PE=1 SV=2//1.34206e-93	GO:0005856//GO:0005622	GO:0005515	GO:0007165
GOAT_ENSBTAP00000037474	44	33	32	242	232	284	2.23817	1.70076	1.85337	11.2062	10.6666	12.9854	36.3333	252.667	1.93077	11.6194	2.58929	3.58e-11	3.58e-10	L3MBTL2	sp|Q1JQD9|LMBL2_BOVIN Lethal(3)malignant brain tumor-like protein 2 OS=Bos taurus GN=L3MBTL2 PE=2 SV=1//0	GO:0005634	GO:0042393//GO:0035064//GO:0046872//GO:0008270	GO:0006355//GO:0006351//GO:0016568
GOAT_ENSBTAP00000037502	40	40	31	356	412	369	0.601704	0.609638	0.530955	4.87503	5.60169	4.98939	37	379	0.580766	5.15537	3.15005	3.01e-19	1.24e-17	IGF2R	sp|P08169|MPRI_BOVIN Cation-independent mannose-6-phosphate receptor OS=Bos taurus GN=IGF2R PE=1 SV=2//0	GO:0005737//GO:0005641//GO:0030140//GO:0005768//GO:0005634//GO:0016020//GO:0030139//GO:0005624//GO:0009986//GO:0016021	GO:0001948//GO:0051219//GO:0005215//GO:0004872//GO:0005515//GO:0005520//GO:0005537	GO:0006810
GOAT_ENSBTAP00000037784	76	70	57	356	360	316	3.51675	3.28182	3.00314	14.9962	15.0567	13.1435	67.6667	344	3.26723	14.3988	2.13981	1.91e-08	1.16e-07	Tle3	sp|Q9JIT3|TLE3_RAT Transducin-like enhancer protein 3 OS=Rattus norvegicus GN=Tle3 PE=2 SV=1//5.9509e-08	GO:0005634	GO:0005515	GO:0006355
GOAT_ENSBTAP00000037810	957	1734	1666	641	517	596	178.747	328.145	354.304	108.991	87.2805	100.063	1452.33	584.667	287.066	98.7781	-1.53912	0.000208489	0.000621158	IFT27	sp|Q0VCN3|IFT27_BOVIN Intraflagellar transport protein 27 homolog OS=Bos taurus GN=IFT27 PE=2 SV=1//6.63959e-26	GO:0000139//GO:0031226//GO:0005737//GO:0030667//GO:0016020//GO:0005886//GO:0005622//GO:0005634	GO:0000166//GO:0005525//GO:0003924//GO:0019002//GO:0005515	GO:0007165//GO:0006886//GO:0043001//GO:0006810//GO:0006913//GO:0035272//GO:0006184//GO:0007264//GO:0045055//GO:0015031//GO:0017157
GOAT_ENSBTAP00000037874	99	23	48	437	362	419	6.80133	1.60094	3.75468	27.3303	22.4784	25.8744	56.6667	406	4.05232	25.2277	2.63819	7.7e-14	1.27e-12	HSF2	sp|Q03933|HSF2_HUMAN Heat shock factor protein 2 OS=Homo sapiens GN=HSF2 PE=1 SV=1//6.74924e-16	GO:0005737//GO:0005634	GO:0043565//GO:0003700//GO:0001162//GO:0003677//GO:0042803	GO:0006355//GO:0007283//GO:0045944
GOAT_ENSBTAP00000037932	27	14	15	227	228	205	0.701639	0.36861	0.443828	5.37008	5.3553	4.78852	18.6667	220	0.504692	5.1713	3.35705	1.26e-16	3.3e-15	IBTK	sp|Q9P2D0|IBTK_HUMAN Inhibitor of Bruton tyrosine kinase OS=Homo sapiens GN=IBTK PE=1 SV=3//3.77058e-10	GO:0005737//GO:0005634	GO:0019901//GO:0005515//GO:0030292	GO:0051209//GO:0061099//GO:0001933
GOAT_ENSBTAP00000037982	325	90	191	1239	1401	870	5.42093	1.52098	3.62741	18.8134	21.1216	13.0439	202	1170	3.52311	17.6596	2.32554	1.47e-05	5.36e-05	DOCK10	sp|Q96BY6|DOC10_HUMAN Dedicator of cytokinesis protein 10 OS=Homo sapiens GN=DOCK10 PE=1 SV=3//1.36321e-08	--	GO:0005089//GO:0005543//GO:0005085//GO:0017048//GO:0051020//GO:0005488//GO:0005515//GO:0005525	--
GOAT_ENSBTAP00000038110	361	236	192	1524	1354	1459	31.7304	21.017	19.2151	121.943	107.569	115.272	263	1445.67	23.9875	114.928	2.26037	5.48e-13	7.61e-12	ACTR3B	sp|Q9P1U1|ARP3B_HUMAN Actin-related protein 3B OS=Homo sapiens GN=ACTR3B PE=1 SV=1//0	GO:0005856	GO:0003779//GO:0005524	GO:0030833
GOAT_ENSBTAP00000038273	4458	5620	4817	1827	1610	2015	2620.83	3347.53	3224.4	977.783	855.508	1064.81	4965	1817.33	3064.26	966.034	-1.66539	1e-13	1.62e-12	MP68	sp|P14790|68MP_BOVIN 6.8 kDa mitochondrial proteolipid OS=Bos taurus GN=MP68 PE=1 SV=1//6.8263e-21	GO:0016021//GO:0016020//GO:0005753//GO:0005739//GO:0031966	--	--
GOAT_ENSBTAP00000038304	72	37	55	455	433	417	5.35691	2.78916	4.65927	30.8176	29.1185	27.8879	54.6667	435	4.26845	29.2747	2.77787	5.81e-16	1.37e-14	Ppp2r5a	sp|Q6PD03|2A5A_MOUSE Serine/threonine-protein phosphatase 2A 56 kDa regulatory subunit alpha isoform OS=Mus musculus GN=Ppp2r5a PE=1 SV=1//1.47445e-11	GO:0005737//GO:0031430//GO:0000159//GO:0005624//GO:0030018	GO:0019900//GO:0005515//GO:0008601//GO:0005488	GO:0090219//GO:0007165//GO:0090005//GO:0035307
GOAT_ENSBTAP00000038597	9	14	5	140	183	212	0.463062	0.729816	0.292914	6.55736	8.51033	9.8046	9.33333	178.333	0.495264	8.29076	4.06524	5.89e-16	1.39e-14	Sv2b	sp|Q63564|SV2B_RAT Synaptic vesicle glycoprotein 2B OS=Rattus norvegicus GN=Sv2b PE=1 SV=1//8.65739e-22	GO:0008021//GO:0016021//GO:0016020	GO:0005215//GO:0022857	GO:0006810//GO:0055085
GOAT_ENSBTAP00000038635	31	61	35	332	287	288	8.42203	16.7909	10.8267	82.1104	70.4752	70.3308	42.3333	302.333	12.0132	74.3054	2.62885	1.88e-12	2.37e-11	SLC6A11	sp|P48066|S6A11_HUMAN Sodium- and chloride-dependent GABA transporter 3 OS=Homo sapiens GN=SLC6A11 PE=2 SV=1//6.76172e-81	GO:0016021//GO:0016020//GO:0005887	GO:0005332//GO:0005328//GO:0015293//GO:0004014	GO:0006810//GO:0006836//GO:0008295
GOAT_ENSBTAP00000039102	106	61	45	543	606	640	18.6339	10.8647	9.00709	86.8967	96.2876	101.129	70.6667	596.333	12.8352	94.7712	2.88434	1.04e-18	3.96e-17	NRSN2	sp|Q9GZP1|NRSN2_HUMAN Neurensin-2 OS=Homo sapiens GN=NRSN2 PE=2 SV=1//6.13255e-34	GO:0016023//GO:0030133//GO:0043025//GO:0005886	--	--
GOAT_ENSBTAP00000039151	4	10	10	114	144	124	0.220347	0.558132	0.627222	5.71686	7.16984	6.13999	8	127.333	0.468567	6.34223	3.75866	1.5e-14	2.78e-13	slc23a2	sp|B0JZG0|S23A2_XENTR Solute carrier family 23 member 2 OS=Xenopus tropicalis GN=slc23a2 PE=2 SV=1//2.69106e-15	GO:0005737//GO:0016020//GO:0016324//GO:0016323//GO:0009925//GO:0005886	GO:0005215//GO:0070890//GO:0015229//GO:0008520	GO:0006810//GO:0015882//GO:0070904//GO:0055085
GOAT_ENSBTAP00000039412	1613	1845	1425	1118	1001	1255	388.219	449.913	390.509	244.957	217.759	271.509	1627.67	1124.67	409.547	244.742	-0.74277	5.6e-12	6.49e-11	PTPMT1	sp|Q8WUK0|PTPM1_HUMAN Phosphatidylglycerophosphatase and protein-tyrosine phosphatase 1 OS=Homo sapiens GN=PTPMT1 PE=1 SV=1//9.89724e-82	GO:0005739	GO:0016787//GO:0016791//GO:0008138//GO:0004725//GO:0004439	GO:0016311//GO:0006470//GO:0046855//GO:0035335
GOAT_ENSBTAP00000039445	48	95	56	433	479	415	1.67937	3.36758	2.23083	13.7911	15.1475	13.0512	66.3333	442.333	2.42593	13.9966	2.52847	3.08e-13	4.48e-12	LIMCH1	sp|Q9UPQ0|LIMC1_HUMAN LIM and calponin homology domains-containing protein 1 OS=Homo sapiens GN=LIMCH1 PE=1 SV=4//0	--	GO:0003779//GO:0046872//GO:0005515//GO:0008270	GO:0031032
GOAT_ENSBTAP00000039576	52	18	16	343	504	362	16.5027	5.78778	5.78154	99.0945	144.571	103.266	28.6667	403	9.35733	115.644	3.62745	3.62e-13	5.23e-12	GOLGA7	sp|Q7Z5G4|GOGA7_HUMAN Golgin subfamily A member 7 OS=Homo sapiens GN=GOLGA7 PE=1 SV=2//1.58322e-69	GO:0005794//GO:0016020//GO:0000139	--	--
GOAT_ENSBTAP00000039739	114	64	50	845	953	887	3.9885	2.26869	1.99181	26.9133	30.1368	27.895	76	895	2.74967	28.315	3.36424	1.95e-28	3.06e-26	Ipo7	sp|Q9EPL8|IPO7_MOUSE Importin-7 OS=Mus musculus GN=Ipo7 PE=1 SV=2//2.24328e-11	GO:0005737//GO:0005794	GO:0042393//GO:0008565//GO:0005488//GO:0005515	GO:0006886//GO:0006606
GOAT_ENSBTAP00000039949	20	10	5	193	140	146	1.37929	0.698739	0.392617	12.1168	8.72675	9.05058	11.6667	159.667	0.823549	9.96471	3.5969	2.93e-15	6.14e-14	TRIM6	sp|Q9C030|TRIM6_HUMAN Tripartite motif-containing protein 6 OS=Homo sapiens GN=TRIM6 PE=1 SV=1//2.98618e-52	GO:0005622//GO:0005737//GO:0005634//GO:0030529//GO:0000932//GO:0019005	GO:0008270//GO:0003677//GO:0016874//GO:0046872//GO:0003723//GO:0004842//GO:0005515	GO:0090086//GO:0000209//GO:0007049//GO:0070936//GO:0045787//GO:0016567//GO:0008284//GO:0045893//GO:0031648//GO:0032088//GO:0006513//GO:0051865//GO:0043161
GOAT_ENSBTAP00000040182	5254	6192	6174	2488	2017	2224	3768.33	4499.65	5041.95	1624.48	1307.57	1433.81	5873.33	2243	4436.65	1455.29	-1.60817	2.45e-12	3.03e-11	Rpl38	sp|Q9JJI8|RL38_MOUSE 60S ribosomal protein L38 OS=Mus musculus GN=Rpl38 PE=2 SV=3//5.48802e-11	GO:0033291//GO:0022625//GO:0005622//GO:0030529//GO:0005840	GO:0003735	GO:0042474//GO:0001501//GO:0007605//GO:0048318//GO:0006417//GO:0001503//GO:0034463//GO:0006412
GOAT_ENSBTAP00000040188	33	46	30	235	234	275	6.39692	9.0345	6.62143	41.4696	40.9989	47.9168	36.3333	248	7.35095	43.4618	2.56374	6.92e-11	6.52e-10	KCTD2	sp|Q14681|KCTD2_HUMAN BTB/POZ domain-containing protein KCTD2 OS=Homo sapiens GN=KCTD2 PE=1 SV=3//2.49123e-28	--	GO:0005515	GO:0051260
GOAT_ENSBTAP00000040327	120	56	84	635	531	449	6.14769	2.90675	4.89986	29.6148	24.5881	20.6764	86.6667	538.333	4.65144	24.9598	2.42386	1.02e-11	1.14e-10	PECAM1	sp|P51866|PECA1_BOVIN Platelet endothelial cell adhesion molecule OS=Bos taurus GN=PECAM1 PE=1 SV=1//1.77564e-24	GO:0009897//GO:0045121//GO:0030485//GO:0071944//GO:0005886//GO:0016020	GO:0005515	GO:0042523//GO:0030334//GO:0042060//GO:0007266
GOAT_ENSBTAP00000040372	145	135	130	478	633	536	2.47262	2.33245	2.5241	7.42032	9.75647	8.21585	136.667	549	2.44306	8.46421	1.79269	1.87e-06	8.01e-06	SEC16A	sp|O15027|SC16A_HUMAN Protein transport protein Sec16A OS=Homo sapiens GN=SEC16A PE=1 SV=3//3.03207e-07	GO:0005829	--	GO:0048208//GO:0007029
GOAT_ENSBTAP00000040410	3126	3735	3101	1822	1962	1966	918.879	1112.37	1037.87	487.554	521.275	519.458	3320.67	1916.67	1023.04	509.429	-1.00591	2.06e-12	2.57e-11	EDF1	sp|O60869|EDF1_HUMAN Endothelial differentiation-related factor 1 OS=Homo sapiens GN=EDF1 PE=1 SV=1//3.52776e-59	GO:0005737//GO:0016020//GO:0005730//GO:0005669//GO:0005634	GO:0043565//GO:0003713//GO:0005515//GO:0003677//GO:0005516	GO:0030154//GO:0006355//GO:0006351//GO:0043388//GO:0007275
GOAT_ENSBTAP00000040458	52	43	34	362	402	466	4.12566	3.45659	3.07145	26.1459	28.8281	33.2334	43	410	3.55123	29.4025	3.04954	1.25e-18	4.68e-17	FAM134C	sp|Q86VR2|F134C_HUMAN Protein FAM134C OS=Homo sapiens GN=FAM134C PE=1 SV=1//2.62844e-15
GOAT_ENSBTAP00000040493	16	13	9	191	225	220	1.1686	0.962011	0.748451	12.6995	14.8535	14.4434	12.6667	212	0.959689	13.9988	3.86659	2.5e-20	1.23e-18	SLC2A3	sp|P47843|GTR3_SHEEP Solute carrier family 2, facilitated glucose transporter member 3 OS=Ovis aries GN=SLC2A3 PE=2 SV=1//3.96152e-10	GO:0005737//GO:0016020//GO:0016021//GO:0002080//GO:0005886	GO:0022891//GO:0005355//GO:0005215//GO:0022857//GO:0055056//GO:0033300	GO:0070837//GO:0006810//GO:0008643//GO:0015758//GO:0055085
GOAT_ENSBTAP00000040523	675	868	724	261	262	248	268.962	350.425	328.472	94.6742	94.3598	88.8252	755.667	257	315.953	92.6197	-1.77032	8.09e-14	1.32e-12	Ppp6r1	sp|Q7TSI3|PP6R1_MOUSE Serine/threonine-protein phosphatase 6 regulatory subunit 1 OS=Mus musculus GN=Ppp6r1 PE=1 SV=1//1.34247e-12
GOAT_ENSBTAP00000040550	54	54	39	235	296	258	6.07061	6.15065	4.99202	24.0498	30.0766	26.0709	49	263	5.73776	26.7324	2.22003	2.78e-08	1.64e-07	MYADM	sp|Q96S97|MYADM_HUMAN Myeloid-associated differentiation marker OS=Homo sapiens GN=MYADM PE=1 SV=2//0	GO:0016021//GO:0016020	--	--
GOAT_ENSBTAP00000040563	559	342	346	2191	2230	1986	42.4716	26.3271	29.932	151.542	153.141	135.633	415.667	2135.67	32.9102	146.772	2.15697	3.67e-12	4.4e-11	SLC2A1	sp|P27674|GTR1_BOVIN Solute carrier family 2, facilitated glucose transporter member 1 OS=Bos taurus GN=SLC2A1 PE=2 SV=1//0	GO:0009897//GO:0012506//GO:0032593//GO:0030136//GO:0005737//GO:0070062//GO:0016021//GO:0016020//GO:0048471//GO:0042383//GO:0005792//GO:0030140//GO:0016323//GO:0030659//GO:0012505//GO:0005887//GO:0005886//GO:0031982//GO:0042470//GO:0000299//GO:0030496//GO:0005622//GO:0001939//GO:0005768	GO:0055056//GO:0042802//GO:0005355//GO:0005215//GO:0022891//GO:0022857//GO:0005515//GO:0033300	GO:0071470//GO:0042593//GO:0046323//GO:0032869//GO:0010021//GO:0008643//GO:0015758//GO:0006810//GO:0050873//GO:0042149//GO:0055085//GO:0070837
GOAT_ENSBTAP00000040702	24	6	14	159	187	175	2.90769	0.736508	1.93125	17.5364	20.4775	19.0578	14.6667	173.667	1.85848	19.0239	3.35562	1.21e-14	2.27e-13	KRT222	sp|Q2KI75|KT222_BOVIN Keratin-like protein KRT222 OS=Bos taurus GN=KRT222 PE=2 SV=1//3.72921e-07	GO:0005882	GO:0005198	--
GOAT_ENSBTAP00000040713	14	35	21	178	251	217	0.61227	1.55086	1.0457	7.08663	9.92174	8.53047	23.3333	215.333	1.06961	8.51295	2.99257	1.55e-12	1.99e-11	KIAA0317	sp|O15033|K0317_HUMAN Protein KIAA0317 OS=Homo sapiens GN=KIAA0317 PE=2 SV=3//1.59535e-08	GO:0005622	GO:0016881	GO:0006464
GOAT_ENSBTAP00000040732	18095	21563	20425	9867	8808	9216	3244.57	3917.4	4169.98	1610.6	1427.5	1485.39	20027.7	9297	3777.32	1507.83	-1.32489	7.17e-12	8.18e-11	RPL13A	sp|Q3SZ90|RL13A_BOVIN 60S ribosomal protein L13a OS=Bos taurus GN=RPL13A PE=2 SV=3//1.01665e-131	GO:0005840//GO:0015934//GO:0030529	GO:0003735	GO:0006412
GOAT_ENSBTAP00000040765	85	42	47	452	497	456	6.35048	3.17926	3.99815	30.7419	33.5616	30.6232	58	468.333	4.5093	31.6423	2.81088	1.38e-16	3.57e-15	PSEN1	sp|Q9XT97|PSN1_BOVIN Presenilin-1 OS=Bos taurus GN=PSEN1 PE=2 SV=1//0	GO:0005783//GO:0030425//GO:0031594//GO:0016021//GO:0016020//GO:0005794//GO:0005791//GO:0005790//GO:0031965//GO:0030426//GO:0005622//GO:0043227//GO:0030018//GO:0048471//GO:0043025//GO:0035253//GO:0005938//GO:0005640//GO:0000139//GO:0005789//GO:0031410//GO:0005634//GO:0005739//GO:0070765//GO:0016324//GO:0009986//GO:0005624//GO:0005743//GO:0043198//GO:0005813//GO:0030424//GO:0005887//GO:0005886//GO:…	GO:0005262//GO:0030165//GO:0016787//GO:0008013//GO:0008233//GO:0045296//GO:0004190//GO:0005515//GO:0004175	GO:0032436//GO:0015871//GO:0007613//GO:0007611//GO:0051563//GO:0007219//GO:0034205//GO:0007176//GO:0007175//GO:0006839//GO:0001756//GO:0042325//GO:0043406//GO:0070588//GO:0050820//GO:0048167//GO:0001764//GO:0035556//GO:0044267//GO:0002286//GO:0001568//GO:0042640//GO:0048705//GO:0006816//GO:0060075//GO:0051444//GO:0007220//GO:0007420//GO:0051604//GO:0051966//GO:0043393//GO:0001708//GO:0009791//GO:…
GOAT_ENSBTAP00000040772	33	26	20	250	271	233	4.19656	3.34998	2.8959	28.9417	31.1493	26.6338	26.3333	251.333	3.48081	28.9083	3.05399	4.21e-15	8.56e-14	Bhlhe41	sp|Q99PV5|BHE41_MOUSE Class E basic helix-loop-helix protein 41 OS=Mus musculus GN=Bhlhe41 PE=2 SV=1//6.36012e-58	GO:0005634	GO:0046983//GO:0003677	GO:0006355//GO:0006351
GOAT_ENSBTAP00000040793	26	36	18	220	230	215	3.95085	5.54254	3.11432	30.433	31.5896	29.3666	26.6667	221.667	4.20257	30.463	2.85772	1.36e-12	1.77e-11	LASP1	sp|Q3B7M5|LASP1_BOVIN LIM and SH3 domain protein 1 OS=Bos taurus GN=LASP1 PE=2 SV=1//1.55712e-118	GO:0005737//GO:0005856//GO:0005938//GO:0005925	GO:0046872//GO:0051015//GO:0003779//GO:0005515//GO:0008270	GO:0006811//GO:0006810
GOAT_ENSBTAP00000040809-D2	22	31	13	184	214	203	0.850166	1.21376	0.572002	6.47297	7.4747	7.05139	22	200.333	0.878642	6.99969	2.99394	5.64e-13	7.82e-12	SLC8A3	sp|P57103|NAC3_HUMAN Sodium/calcium exchanger 3 OS=Homo sapiens GN=SLC8A3 PE=2 SV=2//1.1096e-10	GO:0016021//GO:0016020	GO:0005432//GO:0015368	GO:0006816//GO:0030001//GO:0007154//GO:0055085
GOAT_ENSBTAP00000040897	85	56	39	287	240	258	14.1778	9.46385	7.40676	43.579	36.1827	38.6819	60	261.667	10.3495	39.4812	1.93161	5.4e-06	2.13e-05	FNDC5	sp|Q8NAU1|FNDC5_HUMAN Fibronectin type III domain-containing protein 5 OS=Homo sapiens GN=FNDC5 PE=2 SV=3//1.00987e-119	GO:0005783//GO:0005576//GO:0005886	GO:0005515	GO:0090336//GO:0014850
GOAT_ENSBTAP00000040907	243	212	116	1081	1010	1138	28.7603	25.4221	15.6321	116.471	108.046	121.067	190.333	1076.33	23.2715	115.195	2.30744	5.27e-13	7.36e-12	LRRC4B	sp|Q9NT99|LRC4B_HUMAN Leucine-rich repeat-containing protein 4B OS=Homo sapiens GN=LRRC4B PE=1 SV=3//3.23288e-15	--	GO:0005102//GO:0005515	--
GOAT_ENSBTAP00000041069	138	48	87	751	688	600	7.66083	2.69977	5.49907	37.9526	34.5211	29.9396	91	679.667	5.28655	34.1377	2.69097	5.46e-17	1.53e-15	APPL2	sp|Q8NEU8|DP13B_HUMAN DCC-interacting protein 13-beta OS=Homo sapiens GN=APPL2 PE=1 SV=3//2.01469e-13	GO:0016581//GO:0005634//GO:0010008	GO:0005543//GO:0005515	GO:0008283
GOAT_ENSBTAP00000041167	91	68	58	356	380	374	4.37453	3.31198	3.17462	15.5792	16.511	16.1607	72.3333	370	3.62038	16.0836	2.15138	1.03e-08	6.63e-08	ESYT2	sp|A0FGR8|ESYT2_HUMAN Extended synaptotagmin-2 OS=Homo sapiens GN=ESYT2 PE=1 SV=1//1.83048e-26	--	GO:0005515	--
GOAT_ENSBTAP00000041320	37	12	23	218	213	209	1.34435	0.441756	0.951509	7.21063	6.99505	6.82584	24	213.333	0.91254	7.0105	2.94156	4.36e-13	6.23e-12	CEP120	sp|A0JN62|CE120_BOVIN Centrosomal protein of 120 kDa OS=Bos taurus GN=CEP120 PE=2 SV=2//0	GO:0005737//GO:0005856//GO:0005813//GO:0005815	GO:0008022//GO:0005515	GO:0030953//GO:0008283//GO:0022027//GO:0000226//GO:0032886//GO:0022008//GO:0021987//GO:0032880
GOAT_ENSBTAP00000041373	74	55	39	269	346	335	3.01563	2.2709	1.80961	9.97938	12.7445	12.2713	56	316.667	2.36538	11.665	2.30205	1.67e-09	1.23e-08	Unc5a	sp|Q8K1S4|UNC5A_MOUSE Netrin receptor UNC5A OS=Mus musculus GN=Unc5a PE=2 SV=1//0	--	GO:0005515	GO:0007165//GO:0033564
GOAT_ENSBTAP00000041402	24	8	10	172	201	172	1.37488	0.464338	0.652271	8.96991	10.4076	8.85689	14	181.667	0.830497	9.41146	3.50237	5.94e-16	1.4e-14	AKAP10	sp|O43572|AKA10_HUMAN A-kinase anchor protein 10, mitochondrial OS=Homo sapiens GN=AKAP10 PE=1 SV=2//0	GO:0005737//GO:0005739//GO:0005886	--	GO:0038032//GO:0008104
GOAT_ENSBTAP00000041453	31	11	8	251	245	223	1.21233	0.435855	0.356224	8.9359	8.66014	7.83903	16.6667	239.667	0.668137	8.47836	3.66557	8.14e-20	3.74e-18	ZZZ3	sp|Q8IYH5|ZZZ3_HUMAN ZZ-type zinc finger-containing protein 3 OS=Homo sapiens GN=ZZZ3 PE=1 SV=1//0	GO:0005671	GO:0008270//GO:0005515//GO:0003677	--
GOAT_ENSBTAP00000041460	95	107	72	527	598	554	6.17182	7.04308	5.32593	31.1677	35.1148	32.3517	91.3333	559.667	6.18028	32.8781	2.41138	1.02e-12	1.36e-11	ATG13	sp|Q5RE28|ATG13_PONAB Autophagy-related protein 13 OS=Pongo abelii GN=ATG13 PE=2 SV=1//0
GOAT_ENSBTAP00000041521	136	185	114	1320	1133	1220	2.6123	3.60036	2.49323	23.0815	19.6704	21.0641	145	1224.33	2.90196	21.272	2.87385	3.74e-22	2.54e-20	Lrp4	sp|Q8VI56|LRP4_MOUSE Low-density lipoprotein receptor-related protein 4 OS=Mus musculus GN=Lrp4 PE=1 SV=3//6.35841e-06	GO:0016021//GO:0016020//GO:0005887//GO:0005886//GO:0005624	GO:0030971//GO:0034185//GO:0005509//GO:0032403//GO:0042803//GO:0005515	GO:0051124//GO:0030326//GO:0032956//GO:0032370//GO:0043277//GO:0008104//GO:0030178//GO:0032374//GO:0001822//GO:0008203//GO:0090090//GO:0014912//GO:2000587//GO:0032429//GO:0009953//GO:0030279//GO:0035909//GO:0010875//GO:0042733//GO:0009954//GO:0042475//GO:0006898//GO:0048856//GO:0043113//GO:0001932//GO:0001942
GOAT_ENSBTAP00000041529	334	174	131	1068	1102	1199	81.4813	43.0081	36.3878	237.185	242.992	262.923	213	1123	53.6258	247.7	2.2076	1.02e-11	1.14e-10	EID1	sp|Q5RDL6|EID1_PONAB EP300-interacting inhibitor of differentiation 1 OS=Pongo abelii GN=EID1 PE=2 SV=1//8.18415e-14
GOAT_ENSBTAP00000041594	33	12	8	247	300	250	0.634207	0.233662	0.175057	4.32135	5.2112	4.31872	17.6667	265.667	0.347642	4.61709	3.73131	1.66e-21	9.82e-20	TRPM7	sp|Q96QT4|TRPM7_HUMAN Transient receptor potential cation channel subfamily M member 7 OS=Homo sapiens GN=TRPM7 PE=1 SV=1//0	GO:0016020//GO:0016021//GO:0005886//GO:0001726	GO:0005262//GO:0016772//GO:0017022//GO:0003779//GO:0004674//GO:0016301//GO:0005216//GO:0005524	GO:0006468//GO:0031032//GO:0016340//GO:0006811//GO:0006810//GO:0070588//GO:0006816//GO:0046777//GO:0055085
GOAT_ENSBTAP00000041598	26	23	18	278	340	357	2.46667	2.21082	1.94439	24.0097	29.1551	30.4441	22.3333	325	2.20729	27.8697	3.65834	2.39e-23	1.93e-21	MAP2K4	sp|P45985|MP2K4_HUMAN Dual specificity mitogen-activated protein kinase kinase 4 OS=Homo sapiens GN=MAP2K4 PE=1 SV=1//0	--	GO:0016772//GO:0000166//GO:0004674//GO:0004713//GO:0005515//GO:0004672//GO:0005524	GO:0006468//GO:0071260//GO:0000165
GOAT_ENSBTAP00000041719	6000	7194	4680	3024	2674	3099	1014.95	1232.97	901.389	465.672	408.84	471.208	5958	2932.33	1049.77	448.573	-1.22666	1.11e-10	1.01e-09	Myl6b	sp|Q8CI43|MYL6B_MOUSE Myosin light chain 6B OS=Mus musculus GN=Myl6b PE=2 SV=1//4.17986e-20	GO:0030016//GO:0030017//GO:0034704//GO:0005876//GO:0005819//GO:0005813//GO:0031672//GO:0031674//GO:0000922//GO:0016459//GO:0005737//GO:0005829//GO:0005856	GO:0044325//GO:0031432//GO:0072542//GO:0005509//GO:0030898//GO:0008307//GO:0003785//GO:0031996//GO:0031997//GO:0005515//GO:0043274//GO:0019904	GO:0055010//GO:0006942//GO:0060048//GO:0051343//GO:0002026//GO:0002027//GO:0032465//GO:0006936//GO:0051592//GO:0060315//GO:0032516//GO:0055117//GO:0035307//GO:0030801//GO:0060316//GO:0005513//GO:0010880
GOAT_ENSBTAP00000041750	746	801	686	398	439	371	77.32	84.1152	80.9562	37.5527	41.126	34.5641	744.333	402.667	80.7971	37.7476	-1.09792	2.79e-16	6.92e-15	CCNI2	sp|Q6ZMN8|CCNI2_HUMAN Cyclin-I2 OS=Homo sapiens GN=CCNI2 PE=2 SV=1//5.93639e-41
GOAT_ENSBTAP00000041778	1556	646	728	12687	14006	10068	138.807	58.3881	73.9448	1030.31	1129.32	807.317	976.667	12253.7	90.3801	988.981	3.45187	7.59e-24	6.62e-22	GLUL	sp|P15103|GLNA_BOVIN Glutamine synthetase OS=Bos taurus GN=GLUL PE=2 SV=4//2.41455e-27
GOAT_ENSBTAP00000041815	44	46	32	206	268	240	3.6867	3.9051	3.05287	15.7129	20.2964	18.0757	40.6667	238	3.54822	18.0283	2.3451	6.57e-09	4.37e-08	SNPH	sp|O15079|SNPH_HUMAN Syntaphilin OS=Homo sapiens GN=SNPH PE=1 SV=2//1.95561e-24	GO:0005881//GO:0005739	--	--
GOAT_ENSBTAP00000041860	3772	4106	3388	1829	1550	1945	1380.3	1522.34	1411.63	609.286	512.665	639.765	3755.33	1774.67	1438.09	587.239	-1.29213	1.18e-21	7.16e-20	TXN	sp|P50413|THIO_SHEEP Thioredoxin OS=Ovis aries GN=TXN PE=1 SV=2//3.52067e-14	GO:0005737//GO:0005739//GO:0005829//GO:0005634//GO:0005576	GO:0015037//GO:0005515//GO:0009055//GO:0015035	GO:0000122//GO:0009314//GO:0033158//GO:0046826//GO:0006355//GO:0022900//GO:0006351//GO:0043388//GO:0006662//GO:0045454//GO:0055114
GOAT_ENSBTAP00000041865	67	46	58	296	355	291	6.40726	4.45702	6.31537	25.7688	30.6849	25.0143	57	314	5.72655	27.156	2.24553	3.49e-09	2.44e-08	PRR5L	sp|Q5E9R0|PRR5L_BOVIN Proline-rich protein 5-like OS=Bos taurus GN=PRR5L PE=2 SV=1//0
GOAT_ENSBTAP00000041906	5568	6552	5110	3618	4281	4400	629.896	750.988	658.209	372.6	437.738	447.425	5743.33	4099.67	679.698	419.254	-0.697067	3.8e-10	3.15e-09	MDH2	sp|Q32LG3|MDHM_BOVIN Malate dehydrogenase, mitochondrial OS=Bos taurus GN=MDH2 PE=1 SV=1//0
GOAT_ENSBTAP00000041984	159	98	99	592	530	449	16.7705	10.4729	11.8894	56.843	50.5272	42.5691	118.667	523.667	13.0443	49.9797	1.93793	1.55e-07	8.02e-07	P2RY12	sp|Q95KC3|P2Y12_MACFA P2Y purinoceptor 12 OS=Macaca fascicularis GN=P2RY12 PE=2 SV=1//0	GO:0016021//GO:0016020	GO:0001621//GO:0004930//GO:0004871//GO:0001609//GO:0045028//GO:0004872	GO:0043270//GO:0007188//GO:0007165//GO:0001973//GO:0035589//GO:0007186//GO:0030168
GOAT_ENSBTAP00000042049	2642	2353	2395	1784	1604	2030	1076.66	971.533	1111.28	661.829	590.813	743.602	2463.33	1806	1053.16	665.415	-0.662399	5.26e-11	5.11e-10	FXYD1	sp|Q3SZX0|PLM_BOVIN Phospholemman OS=Bos taurus GN=FXYD1 PE=3 SV=1//3.68993e-43	GO:0016021//GO:0016020//GO:0034707	GO:0005254//GO:0005216	GO:0006810//GO:0006811//GO:0006821
GOAT_ENSBTAP00000042267	73	20	22	441	422	439	3.56661	0.990039	1.22385	19.6145	18.6356	19.2795	38.3333	434	1.92683	19.1765	3.31504	6.44e-22	4.19e-20	PRKRIR	sp|O43422|P52K_HUMAN 52 kDa repressor of the inhibitor of the protein kinase OS=Homo sapiens GN=PRKRIR PE=2 SV=2//1.60849e-13	GO:0005634	GO:0046983//GO:0003676	--
GOAT_ENSBTAP00000042335	25	30	17	725	835	767	2.06576	2.5116	1.59942	54.5359	62.3627	56.9682	24	775.667	2.05892	57.9556	4.81499	1.61e-50	4.88e-47	PPP2R2C	sp|Q9Y2T4|2ABG_HUMAN Serine/threonine-protein phosphatase 2A 55 kDa regulatory subunit B gamma isoform OS=Homo sapiens GN=PPP2R2C PE=2 SV=4//0	GO:0000159	GO:0008601//GO:0005515	GO:0007165
GOAT_ENSBTAP00000042442	4	10	9	153	200	170	0.353316	0.894936	0.905146	12.3027	15.9673	13.4974	7.66667	174.333	0.717799	13.9225	4.27769	4.7e-21	2.57e-19	Slc35e2	sp|Q8C811|S35E2_MOUSE Solute carrier family 35 member E2 OS=Mus musculus GN=Slc35e2 PE=2 SV=1//0	GO:0016021//GO:0016020	--	GO:0055085
GOAT_ENSBTAP00000042463	10448	12782	9041	4243	3950	4712	5430.17	6730.82	5350.2	2007.51	1855.56	2201.32	10757	4301.67	5837.06	2021.46	-1.52984	3.72e-14	6.44e-13	Pcsk1n	sp|Q9QXU9|PCSK1_RAT Proprotein convertase 1 inhibitor OS=Rattus norvegicus GN=Pcsk1n PE=1 SV=1//2.30929e-12	GO:0005615//GO:0030141//GO:0005802	GO:0004867	GO:0002021//GO:0009409//GO:0016486
GOAT_ENSBTAP00000042481	775	516	504	2979	3099	3113	81.5035	54.9811	60.3502	285.2	294.575	294.274	598.333	3063.67	65.6116	291.35	2.15073	1.97e-12	2.48e-11	Gnb1	sp|P54311|GBB1_RAT Guanine nucleotide-binding protein G(I)/G(S)/G(T) subunit beta-1 OS=Rattus norvegicus GN=Gnb1 PE=1 SV=4//0	GO:0005737//GO:0005624//GO:0005834//GO:0005622//GO:0048471//GO:0001750	GO:0005515//GO:0003924//GO:0051020//GO:0004871	GO:0008283//GO:0007200//GO:0071870//GO:0007165//GO:0071380//GO:0007191//GO:0006184//GO:0050909//GO:0007186//GO:0060041
GOAT_ENSBTAP00000042551	20	11	14	316	322	356	2.49906	1.39261	1.99181	35.945	36.3665	39.9848	15	331.333	1.96116	37.4321	4.2545	9.45e-30	1.74e-27	CAPZA1	sp|A4FUA8|CAZA1_BOVIN F-actin-capping protein subunit alpha-1 OS=Bos taurus GN=CAPZA1 PE=2 SV=1//1.12097e-09	GO:0005737//GO:0005856//GO:0071203//GO:0008290	GO:0003779	GO:0030036//GO:0051693
GOAT_ENSBTAP00000042623	91	71	35	351	313	380	3.65852	2.89209	1.60216	12.8462	11.3739	13.7324	65.6667	348	2.71759	12.6508	2.21883	5.96e-09	3.98e-08	PDE2A	sp|P14099|PDE2A_BOVIN cGMP-dependent 3&apos;,5&apos;-cyclic phosphodiesterase OS=Bos taurus GN=PDE2A PE=1 SV=2//1.55943e-24
GOAT_ENSBTAP00000042650	72	34	37	313	260	312	10.7585	5.14738	6.29496	42.5762	35.1148	41.9054	47.6667	295	7.40027	39.8655	2.42949	2.31e-10	1.99e-09	UNG	sp|P13051|UNG_HUMAN Uracil-DNA glycosylase OS=Homo sapiens GN=UNG PE=1 SV=2//3.29832e-22	GO:0005634//GO:0005739	GO:0016787//GO:0016799//GO:0016798//GO:0004844	GO:0006284//GO:0006281//GO:0006974//GO:0008152//GO:0016447//GO:0016446
GOAT_ENSBTAP00000042823	79	102	50	518	722	706	7.74061	10.126	5.57816	46.2043	63.9417	62.18	77	648.667	7.81492	57.442	2.8778	4.51e-13	6.42e-12	KCNAB2	sp|Q27955|KCAB2_BOVIN Voltage-gated potassium channel subunit beta-2 OS=Bos taurus GN=KCNAB2 PE=1 SV=1//8.52395e-15	GO:0005737//GO:0044224//GO:0016021	GO:0005216//GO:0005249//GO:0005244	GO:0006813//GO:0006811//GO:0006810//GO:0034765
GOAT_ENSBTAP00000042915	1399	1906	1712	494	421	509	716.719	989.334	998.638	230.39	194.945	234.394	1672.33	474.667	901.564	219.91	-2.03552	2.33e-11	2.42e-10	PET100	sp|E1BHC3|PT100_BOVIN Protein PET100 homolog, mitochondrial OS=Bos taurus GN=PET100 PE=3 SV=1//2.39822e-41
GOAT_ENSBTAP00000043064	1738	1446	886	6387	8069	8422	65.5388	55.2467	38.0413	219.255	275.022	285.471	1356.67	7626	52.9422	259.916	2.29555	2.55e-12	3.14e-11	CLSTN1	sp|O94985|CSTN1_HUMAN Calsyntenin-1 OS=Homo sapiens GN=CLSTN1 PE=1 SV=1//0	GO:0016021//GO:0016020//GO:0045211//GO:0005576	GO:0005509	GO:0007156
GOAT_ENSBTAP00000043164	40	27	19	236	218	200	3.13201	2.14199	1.69391	16.8221	15.4283	14.0764	28.6667	218	2.32264	15.4423	2.73305	2.03e-11	2.14e-10	Ankrd34a	sp|Q5BJT1|AN34A_RAT Ankyrin repeat domain-containing protein 34A OS=Rattus norvegicus GN=Ankrd34a PE=2 SV=1//2.42055e-06	GO:0005737	GO:0005515	--
GOAT_ENSBTAP00000043233	23	24	11	415	532	545	3.2094	3.3931	1.74768	52.7168	67.0975	68.3582	19.3333	497.333	2.78339	62.7242	4.49411	3.66e-35	1.41e-32	PRNP	sp|Q5XVM4|PRIO_RUPRU Major prion protein OS=Rupicapra rupicapra GN=PRNP PE=3 SV=1//4.12067e-102	GO:0005783//GO:0031225//GO:0005730//GO:0005634//GO:0016020//GO:0005794//GO:0005886//GO:0043231//GO:0045121	GO:0046872//GO:0042802//GO:0015631//GO:0008017//GO:0005507//GO:0005515	GO:0046007//GO:0050860//GO:0070885//GO:0007165//GO:0051260//GO:0043433//GO:0032700//GO:0032703//GO:0043066//GO:0006979//GO:0006355//GO:0032689//GO:0001933
GOAT_ENSBTAP00000043364	1780	2472	1837	978	989	975	219.359	308.655	257.762	109.718	110.162	108.004	2029.67	980.667	261.925	109.295	-1.26093	3.09e-08	1.81e-07	NUDT22	sp|Q2TBI8|NUD22_BOVIN Nucleoside diphosphate-linked moiety X motif 22 OS=Bos taurus GN=NUDT22 PE=2 SV=1//0	--	GO:0016787	--
GOAT_ENSBTAP00000043467	314	150	120	2138	2938	2653	59.2659	28.6851	25.7887	367.357	501.218	450.102	194.667	2576.33	37.9132	439.559	3.53528	9.66e-23	7.11e-21	RTN3	sp|Q08D83|RTN3_BOVIN Reticulon-3 OS=Bos taurus GN=RTN3 PE=2 SV=1//1.14894e-132	GO:0005783	--	--
GOAT_ENSBTAP00000043495	32	20	16	192	180	171	2.65028	1.67826	1.50881	14.476	13.4745	12.7302	22.6667	181	1.94578	13.5602	2.80096	6.57e-11	6.23e-10	TANK	sp|Q92844|TANK_HUMAN TRAF family member-associated NF-kappa-B activator OS=Homo sapiens GN=TANK PE=1 SV=2//1.10814e-11	--	GO:0031625//GO:0005515	GO:0007249
GOAT_ENSBTAP00000043516	1531	1474	1566	995	1007	1077	694.988	677.936	809.407	411.178	413.172	439.456	1523.67	1026.33	727.444	421.269	-0.788095	2.04e-12	2.56e-11	Tmem258	sp|P61166|TM258_MOUSE Transmembrane protein 258 OS=Mus musculus GN=Tmem258 PE=2 SV=1//3.51645e-07	GO:0016021//GO:0016020	--	--
GOAT_ENSBTAP00000043518	105	55	47	637	556	580	7.76384	4.1204	3.95693	42.8777	37.1588	38.549	69	591	5.28039	39.5285	2.90418	6.23e-19	2.46e-17	PPM1B	sp|O62830|PPM1B_BOVIN Protein phosphatase 1B OS=Bos taurus GN=PPM1B PE=2 SV=2//0	GO:0008287	GO:0016787//GO:0005515//GO:0000287//GO:0030145//GO:0004721//GO:0004722//GO:0003824//GO:0046872	GO:0006470//GO:0035970
GOAT_ENSBTAP00000043670	361	289	297	2519	2604	2611	30.9713	25.1212	29.0123	196.737	201.926	201.353	315.667	2578	28.3683	200.005	2.81769	1.79e-23	1.47e-21	2017-09-07	sp|Q5R481|SEPT7_PONAB Septin-7 OS=Pongo abelii GN=SEPT7 PE=2 SV=2//4.29658e-19	GO:0005737//GO:0001725//GO:0031105//GO:0015630//GO:0015629//GO:0005730//GO:0005634//GO:0043679//GO:0005886//GO:0019717//GO:0005938	GO:0005525//GO:0000166	GO:0051291//GO:0007049//GO:0051301
GOAT_ENSBTAP00000043745	71	57	39	721	782	726	9.46532	7.69911	5.9199	87.5018	94.2286	86.9984	55.6667	743	7.69478	89.5762	3.54116	6.15e-30	1.15e-27	NAPB	sp|P81126|SNAB_BOVIN Beta-soluble NSF attachment protein OS=Bos taurus GN=NAPB PE=1 SV=1//4.326e-40	GO:0016020//GO:0070044//GO:0005622	GO:0019905//GO:0005515	GO:0016192//GO:0010807//GO:0006886//GO:0006810//GO:0015031//GO:0035494//GO:0035249
GOAT_ENSBTAP00000043782	9	8	8	152	215	160	1.72596	1.55441	1.74683	26.536	37.267	27.5807	8.33333	175.667	1.67573	30.4613	4.18411	5.19e-19	2.08e-17	CAV1	sp|Q07DX1|CAV1_MUNRE Caveolin-1 OS=Muntiacus reevesi GN=CAV1 PE=3 SV=1//2.00557e-31
GOAT_ENSBTAP00000043833	3101	6328	6001	1929	1333	1797	1463.25	3025.32	3224.13	828.614	568.519	762.187	5143.33	1686.33	2570.9	719.773	-1.83666	0.000282523	0.000819998	APM2	sp|Q15847|APM2_HUMAN Adipose most abundant gene transcript 2 protein OS=Homo sapiens GN=APM2 PE=1 SV=1//2.16183e-31	GO:0005634	--	GO:0071478//GO:0045600//GO:0045944//GO:2001023
GOAT_ENSBTAP00000043889	1002	1149	1114	519	472	520	378.245	439.455	478.811	178.352	161.045	176.444	1088.33	503.667	432.17	171.947	-1.32964	3.89e-13	5.6e-12		-//-
GOAT_ENSBTAP00000044108	346	125	131	1871	1511	1034	28.2002	10.3223	12.1568	138.821	111.311	75.7521	200.667	1472	16.8931	108.628	2.68489	5.57e-06	2.19e-05	SLC14A1	sp|D3INW7|UT1_CAPHI Urea transporter 1 OS=Capra hircus GN=SLC14A1 PE=2 SV=1//0
GOAT_ENSBTAP00000044266	212	131	135	747	624	702	24.3675	15.2558	17.6678	78.1627	64.8273	72.5286	159.333	691	19.097	71.8396	1.91143	9.19e-08	4.95e-07	C10orf54	sp|Q9H7M9|GI24_HUMAN Platelet receptor Gi24 OS=Homo sapiens GN=C10orf54 PE=1 SV=3//2.63619e-106	--	GO:0005515	--
GOAT_ENSBTAP00000044296	67	24	31	273	293	330	5.2576	1.90815	2.7698	19.5021	20.7816	23.2769	40.6667	298.667	3.31185	21.1869	2.67746	1.15e-12	1.51e-11	ADSS	sp|A4Z6H1|PURA2_PIG Adenylosuccinate synthetase isozyme 2 OS=Sus scrofa GN=ADSS PE=2 SV=1//0	GO:0005737//GO:0005886	GO:0004019//GO:0000287//GO:0000166//GO:0046872//GO:0016874//GO:0005525	GO:0044208//GO:0006164//GO:0006167
GOAT_ENSBTAP00000044313	7	7	3	307	449	381	1.3143	1.33163	0.641343	52.4734	76.1976	64.3011	5.66667	379	1.09576	64.324	5.87536	2.78e-31	5.95e-29	Sc5dl	sp|O88822|SC5D_MOUSE Lathosterol oxidase OS=Mus musculus GN=Sc5dl PE=2 SV=1//4.63106e-114	--	GO:0005506//GO:0016491	GO:0006633//GO:0055114
GOAT_ENSBTAP00000044334	1502	1664	1734	1077	1068	1080	322.539	362.039	423.97	210.539	207.292	208.466	1633.33	1075	369.516	208.766	-0.823752	2.72e-08	1.61e-07	VBP1	sp|Q2TBX2|PFD3_BOVIN Prefoldin subunit 3 OS=Bos taurus GN=VBP1 PE=2 SV=1//1.66162e-116
GOAT_ENSBTAP00000044382	51	14	6	241	258	295	11.724	3.26078	1.57047	50.4343	53.6072	60.9571	23.6667	264.667	5.51841	54.9995	3.3171	2.88e-17	8.68e-16	EPDR1	sp|A6QLI0|EPDR1_BOVIN Mammalian ependymin-related protein 1 OS=Bos taurus GN=EPDR1 PE=2 SV=1//3.19745e-108	GO:0005764//GO:0005576	GO:0005509	GO:0007160
GOAT_ENSBTAP00000044443	309	225	236	1048	1160	1208	55.4061	40.8762	48.1819	171.067	187.999	194.699	256.667	1138.67	48.1548	184.588	1.93856	8.06e-09	5.28e-08	RAB2A	sp|Q5R6B6|RAB2A_PONAB Ras-related protein Rab-2A OS=Pongo abelii GN=RAB2A PE=2 SV=1//1.11975e-134
GOAT_ENSBTAP00000044462	138	78	101	460	508	548	13.3754	7.65969	11.1461	40.5873	44.5031	47.7426	105.667	505.333	10.7271	44.2776	2.04533	1.36e-08	8.53e-08	BGN	sp|O46390|PGS1_SHEEP Biglycan OS=Ovis aries GN=BGN PE=2 SV=1//1.35879e-14
GOAT_ENSBTAP00000044585	21	20	16	461	599	492	2.09775	2.0242	1.81982	41.9218	54.083	44.1771	19	517.333	1.98059	46.7273	4.56026	3.34e-40	2.36e-37	GNAI1	sp|Q5RAD4|GNAI1_PONAB Guanine nucleotide-binding protein G(i) subunit alpha-1 OS=Pongo abelii GN=GNAI1 PE=2 SV=3//6.72699e-32
GOAT_ENSBTAP00000044662	85	98	81	466	383	439	4.53606	5.29877	4.92173	22.6386	18.4739	21.0582	88	429.333	4.91885	20.7236	2.07488	1.6e-08	9.91e-08	COLEC12	sp|A6QP79|COL12_BOVIN Collectin-12 OS=Bos taurus GN=COLEC12 PE=2 SV=1//3.9046e-10	GO:0005581//GO:0016021//GO:0016020	GO:0008329//GO:0030246//GO:0004872//GO:0046872//GO:0030169	GO:0006910//GO:0006955//GO:0002221
GOAT_ENSBTAP00000044670	2960	3523	2949	1584	1496	1586	603.126	727.308	684.171	293.817	275.516	290.481	3144	1555.33	671.535	286.605	-1.2284	1.12e-14	2.12e-13	NDUFS4	sp|Q02375|NDUS4_BOVIN NADH dehydrogenase [ubiquinone] iron-sulfur protein 4, mitochondrial OS=Bos taurus GN=NDUFS4 PE=1 SV=1//3.20962e-07	GO:0016020//GO:0005743//GO:0005739//GO:0070469//GO:0005747	GO:0008137//GO:0016651	GO:0007420//GO:0032981//GO:0048146//GO:0072593//GO:0051591//GO:0022900//GO:0045333//GO:0019933//GO:0001932
GOAT_ENSBTAP00000044793	565	479	477	296	201	237	136.904	117.596	131.601	65.2926	44.0213	51.6195	507	244.667	128.7	53.6444	-1.26251	6.82e-18	2.26e-16	SPA17	sp|Q95230|SP17_PAPHA Sperm surface protein Sp17 OS=Papio hamadryas GN=SPA17 PE=2 SV=1//1.02984e-71	GO:0005737//GO:0016020//GO:0031514//GO:0019861//GO:0072372	GO:0005515//GO:0008603	GO:0001539//GO:0007165//GO:0007339
GOAT_ENSBTAP00000044932	25	35	33	224	203	236	3.55769	5.04645	5.34707	29.0189	26.111	30.1883	31	221	4.6504	28.4394	2.61246	7.55e-11	7.06e-10	DERL1	sp|Q71SS4|DERL1_BOVIN Derlin-1 OS=Bos taurus GN=DERL1 PE=2 SV=1//4.67523e-167	GO:0005783//GO:0016021//GO:0005770//GO:0030176//GO:0005769	GO:0042288//GO:0005515	GO:0006986//GO:0030968//GO:0030970//GO:0034620//GO:0030433
GOAT_ENSBTAP00000044998	58	12	21	337	332	313	17.0489	3.57388	7.02849	90.1787	88.2077	82.7011	30.3333	327.333	9.2171	87.0292	3.23911	8.69e-19	3.33e-17	LAMTOR3	sp|Q17QQ1|LTOR3_BOVIN Ragulator complex protein LAMTOR3 OS=Bos taurus GN=LAMTOR3 PE=2 SV=1//3.77092e-83	GO:0016020//GO:0071986//GO:0005768//GO:0031902	GO:0005085//GO:0005515//GO:0032947	GO:0034613//GO:0071230//GO:0032008//GO:0032006
GOAT_ENSBTAP00000045426	55	46	28	305	318	279	2.32319	1.96865	1.34664	11.7281	12.1408	10.5931	43	300.667	1.87949	11.4873	2.61163	4.58e-12	5.38e-11	Naa15	sp|Q80UM3|NAA15_MOUSE N-alpha-acetyltransferase 15, NatA auxiliary subunit OS=Mus musculus GN=Naa15 PE=1 SV=1//2.57159e-11	GO:0005737//GO:0005667//GO:0005634	GO:0008080//GO:0016407//GO:0005515//GO:0043022	GO:0006474//GO:0045893
GOAT_ENSBTAP00000045603	22	11	6	168	174	185	2.75858	1.39748	0.856619	19.1768	19.7202	20.8513	13	175.667	1.67089	19.9161	3.57524	4.8e-16	1.15e-14	TSNAX	sp|Q5RC21|TSNAX_PONAB Translin-associated protein X OS=Pongo abelii GN=TSNAX PE=2 SV=1//0
GOAT_ENSBTAP00000046047	87	42	27	303	261	290	17.3331	8.47803	6.12482	54.9546	46.9998	51.9341	52	284.667	10.6453	51.2962	2.26863	1.12e-08	7.14e-08	CA10	sp|A0JN41|CAH10_BOVIN Carbonic anhydrase-related protein 10 OS=Bos taurus GN=CA10 PE=2 SV=1//1.31276e-07	GO:0016323	--	--
GOAT_ENSBTAP00000046293	349	161	231	1322	1368	1189	30.6757	14.3378	23.1182	105.78	108.681	93.9396	247	1293	22.7106	102.8	2.17841	7.12e-12	8.13e-11	LAMP2	sp|P13473|LAMP2_HUMAN Lysosome-associated membrane glycoprotein 2 OS=Homo sapiens GN=LAMP2 PE=1 SV=2//6.8196e-09	GO:0016020	--	--
GOAT_ENSBTAP00000046530	1354	1580	1367	825	730	815	139.932	165.442	160.858	77.6173	68.1901	75.7103	1433.67	790	155.411	73.8392	-1.07363	6.48e-14	1.08e-12	SHARPIN	sp|E1BDF2|SHRPN_BOVIN Sharpin OS=Bos taurus GN=SHARPIN PE=3 SV=1//0	GO:0005737//GO:0005829//GO:0005622//GO:0071797	GO:0046872//GO:0008270//GO:0005515//GO:0031593	GO:0050728//GO:0031424//GO:2000348//GO:0010803//GO:0097039//GO:0030262//GO:0008544//GO:0007005//GO:0043123
GOAT_ENSBTAP00000046628	23	21	17	203	301	235	1.3566	1.25497	1.14169	10.9	16.0469	12.4592	20.3333	246.333	1.25109	13.1354	3.3922	2.71e-14	4.79e-13	POGK	sp|Q9P215|POGK_HUMAN Pogo transposable element with KRAB domain OS=Homo sapiens GN=POGK PE=1 SV=2//4.10557e-11	GO:0005622	GO:0003677//GO:0005515//GO:0003676	GO:0006355
GOAT_ENSBTAP00000046803	10	7	3	204	245	262	0.901044	0.639048	0.30778	16.7333	19.9531	21.22	6.66667	237	0.615957	19.3021	4.96979	5.61e-30	1.06e-27	PRKACA	sp|Q8MJ44|KAPCA_CANFA cAMP-dependent protein kinase catalytic subunit alpha OS=Canis familiaris GN=PRKACA PE=2 SV=3//6.53312e-26	GO:0005737//GO:0005634//GO:0016020//GO:0005813//GO:0005886	GO:0016301//GO:0004674//GO:0000166//GO:0016740//GO:0031625//GO:0004672//GO:0005515//GO:0000287//GO:0004691//GO:0016772//GO:0005524//GO:0004713	GO:0006468//GO:0016310
GOAT_ENSBTAP00000047024	43	23	19	215	223	242	4.09031	2.21669	2.05785	18.6179	19.1731	20.6919	28.3333	226.667	2.78828	19.4943	2.8056	3.18e-12	3.86e-11	PANK1	sp|Q8TE04|PANK1_HUMAN Pantothenate kinase 1 OS=Homo sapiens GN=PANK1 PE=1 SV=2//1.59885e-35	GO:0005737//GO:0005634//GO:0071944	GO:0004594//GO:0005524	GO:0015937
GOAT_ENSBTAP00000047104	63	66	52	975	904	858	3.35204	3.55797	3.15026	47.2257	43.4747	41.035	60.3333	912.333	3.35342	43.9118	3.7109	9.95e-35	3.4e-32	DDX3Y	sp|Q5RF43|DDX3Y_PONAB ATP-dependent RNA helicase DDX3Y OS=Pongo abelii GN=DDX3Y PE=2 SV=1//8.97978e-12	GO:0022627//GO:0005783//GO:0033391//GO:0005852//GO:0005654//GO:0048471//GO:0032389//GO:0010494//GO:0005730//GO:0005737//GO:0005634//GO:0005739//GO:0044464//GO:0005622//GO:0005813//GO:0030529//GO:0071013//GO:0005886//GO:0071546//GO:0005682	GO:0050681//GO:0008270//GO:0036002//GO:0008026//GO:0003713//GO:0003712//GO:0000166//GO:0004386//GO:0016818//GO:0043138//GO:0009378//GO:0003676//GO:0003677//GO:0003678//GO:0031369//GO:0008408//GO:0043140//GO:0043024//GO:0005524//GO:0016787//GO:0030145//GO:0003824//GO:0000403//GO:0000405//GO:0004527//GO:0000287//GO:0008143//GO:0048027//GO:0032403//GO:0042803//GO:0008134//GO:0003724//GO:0003723//GO:…	GO:0008104//GO:0072358//GO:0045767//GO:0032508//GO:0010259//GO:0009615//GO:0006260//GO:0043280//GO:0031297//GO:0006284//GO:0006281//GO:0033148//GO:0007283//GO:0032066//GO:0001302//GO:0000723//GO:0034063//GO:0042981//GO:0072332//GO:0051345//GO:0006200//GO:0042256//GO:0045727//GO:0007623//GO:0001701//GO:0009267//GO:0007059//GO:0060765//GO:0006302//GO:0051607//GO:0000731//GO:0043154//GO:0006352//GO:…
GOAT_ENSBTAP00000047573	82	85	37	390	419	392	2.51337	2.63968	1.29127	10.8821	11.608	10.8001	68	400.333	2.14811	11.0967	2.36899	7.15e-11	6.71e-10	DZIP3	sp|Q86Y13|DZIP3_HUMAN E3 ubiquitin-protein ligase DZIP3 OS=Homo sapiens GN=DZIP3 PE=1 SV=2//0
GOAT_ENSBTAP00000047800	138	64	86	517	568	546	3.52485	1.65627	2.50111	12.0215	13.1132	12.5358	96	543.667	2.56075	12.5568	2.29384	2.74e-11	2.8e-10	NUP133	sp|Q8WUM0|NU133_HUMAN Nuclear pore complex protein Nup133 OS=Homo sapiens GN=NUP133 PE=1 SV=2//1.89278e-07
GOAT_ENSBTAP00000047882	75	14	18	480	437	412	16.0096	3.02787	4.37487	93.2751	84.3141	79.0524	35.6667	443	7.80412	85.5472	3.45441	1.03e-23	8.8e-22	MCFD2	sp|Q5R8Z6|MCFD2_PONAB Multiple coagulation factor deficiency protein 2 homolog OS=Pongo abelii GN=MCFD2 PE=2 SV=1//9.68368e-18	--	GO:0005509	--
GOAT_ENSBTAP00000048094	1326	901	471	5778	5878	6591	72.1584	49.6773	29.1835	286.237	289.116	322.398	899.333	6082.33	50.3397	299.251	2.57158	1.88e-19	8.04e-18	NCDN	sp|Q2KJ97|NCDN_BOVIN Neurochondrin OS=Bos taurus GN=NCDN PE=2 SV=1//1.23406e-18
GOAT_ENSBTAP00000048183	12771	12606	11567	9234	8689	8476	1453.93	1454.07	1499.38	957.003	894.103	867.376	12314.7	8799.67	1469.13	906.16	-0.697121	7.31e-12	8.32e-11	RPLP0	sp|Q95140|RLA0_BOVIN 60S acidic ribosomal protein P0 OS=Bos taurus GN=RPLP0 PE=2 SV=3//2.40589e-23	GO:0005737//GO:0005840//GO:0022625//GO:0005634//GO:0030529//GO:0005622	GO:0005515	GO:0042254
GOAT_ENSBTAP00000048266	1886	2198	1736	951	1113	1124	300.599	354.947	315.043	137.985	160.34	161.031	1940	1062.67	323.53	153.119	-1.07925	7.6e-15	1.48e-13	MRPL12	sp|Q7YR75|RM12_BOVIN 39S ribosomal protein L12, mitochondrial OS=Bos taurus GN=MRPL12 PE=1 SV=1//3.33305e-61	GO:0005840//GO:0005622	GO:0003735	GO:0006412
GOAT_ENSBTAP00000048303	690	395	453	2312	2375	2410	67.4236	39.1065	50.4005	205.663	209.761	211.679	512.667	2365.67	52.3102	209.034	1.99858	3.52e-10	2.92e-09	St13	sp|Q99L47|F10A1_MOUSE Hsc70-interacting protein OS=Mus musculus GN=St13 PE=2 SV=1//2.18038e-19
GOAT_ENSBTAP00000048457	2490	2806	2402	1660	1644	1604	174.746	199.519	191.935	106.053	104.282	101.184	2566	1636	188.734	103.839	-0.861997	6.22e-14	1.03e-12	GTF2F1	sp|Q5EA53|T2FA_BOVIN General transcription factor IIF subunit 1 OS=Bos taurus GN=GTF2F1 PE=2 SV=1//3.59178e-155
GOAT_ENSBTAP00000048587	3575	4341	3279	2123	2003	2286	767.695	944.477	801.728	415.018	388.77	441.252	3731.67	2137.33	837.967	415.013	-1.01374	1.53e-11	1.65e-10	Ap2s1	sp|P62744|AP2S1_RAT AP-2 complex subunit sigma OS=Rattus norvegicus GN=Ap2s1 PE=2 SV=1//6.53361e-37
GOAT_ENSBTAP00000048631	104	50	52	431	455	414	10.8735	5.29656	6.1903	41.022	42.9977	38.9075	68.6667	433.333	7.45344	40.9757	2.45879	3.53e-12	4.25e-11	TOB1	sp|P50616|TOB1_HUMAN Protein Tob1 OS=Homo sapiens GN=TOB1 PE=1 SV=1//0	GO:0005737	GO:0003714//GO:0030971//GO:0046332//GO:0005515	GO:0008285//GO:0060212//GO:0017148//GO:0030514//GO:0045668//GO:0007184
GOAT_ENSBTAP00000048638	45	45	36	384	438	330	0.849352	0.860552	0.773662	6.59799	7.4722	5.5987	42	384	0.827855	6.5563	2.98543	1.7e-17	5.32e-16	CGNL1	sp|Q0VF96|CGNL1_HUMAN Cingulin-like protein 1 OS=Homo sapiens GN=CGNL1 PE=1 SV=2//3.20539e-10
GOAT_ENSBTAP00000048673	84	38	42	327	323	301	6.97308	3.19608	3.96979	24.7114	24.2352	22.46	54.6667	317	4.71298	23.8022	2.33638	8.43e-10	6.56e-09	Cluap1	sp|Q8R3P7|CLUA1_MOUSE Clusterin-associated protein 1 OS=Mus musculus GN=Cluap1 PE=1 SV=1//0	--	GO:0005515	--
GOAT_ENSBTAP00000048676	13126	17275	15164	6298	5682	6354	8558.52	11412.3	11257.8	3738.3	3348.63	3724.02	15188.3	6111.33	10409.5	3603.65	-1.53038	1.71e-10	1.51e-09	Rps29	sp|P62275|RS29_RAT 40S ribosomal protein S29 OS=Rattus norvegicus GN=Rps29 PE=1 SV=2//2.71737e-08
GOAT_ENSBTAP00000048711	7	18	16	269	276	236	0.395948	1.03158	1.03046	13.8515	14.1107	11.9991	13.6667	260.333	0.81933	13.3204	4.02305	1.87e-24	1.84e-22	SYK	sp|Q00655|KSYK_PIG Tyrosine-protein kinase SYK OS=Sus scrofa GN=SYK PE=1 SV=1//2.66212e-14
GOAT_ENSBTAP00000048820	43	22	23	323	361	395	1.50885	0.78215	0.918923	10.3178	11.4494	12.4587	29.3333	359.667	1.06997	11.4086	3.41448	1.13e-21	6.92e-20	PCDH9	sp|Q9HC56|PCDH9_HUMAN Protocadherin-9 OS=Homo sapiens GN=PCDH9 PE=1 SV=2//0	GO:0032420//GO:0030175//GO:0005929//GO:0045202//GO:0030054//GO:0042622//GO:0016021//GO:0016020//GO:0048471//GO:0005932//GO:0005887//GO:0032426//GO:0030027//GO:0005913//GO:0005911//GO:0005886//GO:0001917//GO:0005634	GO:0004871//GO:0005427//GO:0005509//GO:0004930//GO:0004888//GO:0005515//GO:0004872	GO:0016331//GO:0016337//GO:0030308//GO:0033326//GO:0060711//GO:0016339//GO:0048563//GO:0007163//GO:0001764//GO:0007165//GO:0007166//GO:0003341//GO:0007413//GO:0032880//GO:0007218//GO:0007156//GO:0021591//GO:0007605//GO:0007186//GO:0006857//GO:0007626//GO:0042384//GO:0060088//GO:0050957//GO:0009987//GO:0050953//GO:0006816//GO:0007155//GO:0001756//GO:0010631//GO:0007015//GO:0048839//GO:0042472//GO:…
GOAT_ENSBTAP00000048894	85	44	36	522	424	388	7.5265	3.94744	3.62952	42.0774	33.9343	30.8819	55	444.667	5.03449	35.6312	2.82322	2.79e-16	6.92e-15	ZNF239	sp|Q16600|ZN239_HUMAN Zinc finger protein 239 OS=Homo sapiens GN=ZNF239 PE=1 SV=3//0	GO:0005622	GO:0008270//GO:0003676	--
GOAT_ENSBTAP00000048954	1794	2333	1989	694	679	684	636.986	839.289	804.11	224.322	217.91	218.304	2038.67	685.667	760.129	220.179	-1.78757	5.02e-13	7.04e-12	Mrpl41	sp|Q5BJX1|RM41_RAT 39S ribosomal protein L41, mitochondrial OS=Rattus norvegicus GN=Mrpl41 PE=1 SV=1//1.89978e-47	GO:0005762//GO:0005739//GO:0030529	GO:0003735	GO:0006412
GOAT_ENSBTAP00000049089	62	36	45	252	242	214	2.47596	1.45661	2.04615	9.16132	8.73508	7.68182	47.6667	236	1.99291	8.52608	2.097	4.6e-07	2.2e-06	ZFP62	sp|Q8NB50|ZFP62_HUMAN Zinc finger protein 62 homolog OS=Homo sapiens GN=ZFP62 PE=1 SV=3//0	GO:0005634//GO:0000790//GO:0016604//GO:0005720//GO:0005622	GO:0008270//GO:0003676//GO:0003677//GO:0000987//GO:0046872//GO:0043621//GO:0044212//GO:0003700//GO:0005515	GO:0035162//GO:0001889//GO:0006349//GO:0001701//GO:0000122//GO:0048821//GO:0016032//GO:0030218//GO:0045892//GO:0045893//GO:0006338//GO:0006355//GO:0006351//GO:0043249//GO:0043045
GOAT_ENSBTAP00000049290	51	35	16	331	356	406	2.40334	1.6711	0.858495	14.1996	15.1633	17.1976	34	364.333	1.64431	15.5202	3.23859	1.36e-19	5.95e-18	SLITRK1	sp|Q96PX8|SLIK1_HUMAN SLIT and NTRK-like protein 1 OS=Homo sapiens GN=SLITRK1 PE=1 SV=2//0	GO:0005737//GO:0005615//GO:0005576	GO:0005509//GO:0048495//GO:0005515	GO:0030308//GO:0007268//GO:0009887//GO:0042592//GO:0009410//GO:0072358//GO:0035264//GO:0008045//GO:0007411//GO:0040023//GO:0033563//GO:0051414//GO:0070100//GO:0031290//GO:0043588//GO:0008285//GO:0007625//GO:0035385//GO:0021756//GO:0032870//GO:0007409//GO:0021772//GO:0050919//GO:0022028//GO:0022029//GO:0030534//GO:0007399//GO:0010629//GO:0048846//GO:0048813//GO:0048812//GO:0061364
GOAT_ENSBTAP00000049421	1224	1243	1002	866	694	782	165.017	169.788	153.811	106.285	84.568	94.7659	1156.33	780.667	162.872	95.2061	-0.774614	3.23e-12	3.91e-11	SURF1	sp|Q15526|SURF1_HUMAN Surfeit locus protein 1 OS=Homo sapiens GN=SURF1 PE=1 SV=1//5.58464e-07
GOAT_ENSBTAP00000049524	747	390	373	2756	2827	2969	21.8682	11.5677	12.433	73.4475	74.8028	78.127	503.333	2850.67	15.2896	75.4591	2.30314	1.7e-14	3.13e-13	COPA	sp|Q27954|COPA_BOVIN Coatomer subunit alpha OS=Bos taurus GN=COPA PE=1 SV=1//0	--	GO:0005515	--
GOAT_ENSBTAP00000049545	28	18	10	223	290	222	2.75102	1.79183	1.11869	19.9455	25.7533	19.6059	18.6667	245	1.88718	21.7683	3.52792	6.18e-19	2.45e-17	PNMA2	sp|Q2KIT6|PNMA2_BOVIN Paraneoplastic antigen Ma2 homolog OS=Bos taurus GN=PNMA2 PE=2 SV=1//0	--	GO:0005515	--
GOAT_ENSBTAP00000049559	89	40	44	296	359	363	5.68927	2.59069	3.20252	17.2251	20.7424	20.8579	57.6667	339.333	3.82749	19.6085	2.35701	3e-10	2.52e-09	Tbc1d24	sp|Q3UUG6|TBC24_MOUSE TBC1 domain family member 24 OS=Mus musculus GN=Tbc1d24 PE=2 SV=2//0
GOAT_ENSBTAP00000049804	1851	2747	2046	1047	1175	1175	277.739	417.618	349.551	143.015	159.356	158.477	2214.67	1132.33	348.303	153.616	-1.18101	1.79e-06	7.71e-06	Nucks1	sp|Q80XU3|NUCKS_MOUSE Nuclear ubiquitous casein and cyclin-dependent kinase substrate 1 OS=Mus musculus GN=Nucks1 PE=1 SV=1//4.6269e-09	GO:0005634	--	--
GOAT_ENSBTAP00000049896	1339	1721	1180	961	959	999	436.533	568.468	438.018	285.21	282.588	292.752	1413.33	973	481.006	286.85	-0.745759	6.33e-07	2.95e-06	ZNF428	sp|Q96B54|ZN428_HUMAN Zinc finger protein 428 OS=Homo sapiens GN=ZNF428 PE=1 SV=2//5.53811e-08
GOAT_ENSBTAP00000049955	68	21	41	620	629	660	2.24341	0.701953	1.54013	18.6207	18.7564	19.5723	43.3333	636.333	1.49516	18.9831	3.66634	1.37e-30	2.83e-28	NNT	sp|P11024|NNTM_BOVIN NAD(P) transhydrogenase, mitochondrial OS=Bos taurus GN=NNT PE=1 SV=3//2.14221e-19
GOAT_ENSBTAP00000050029	75	28	34	1431	1091	979	3.30014	1.2483	1.70343	57.3213	43.3906	38.7215	45.6667	1167	2.08396	46.4778	4.47914	4.53e-27	6.01e-25	HIF1A	sp|Q9XTA5|HIF1A_BOVIN Hypoxia-inducible factor 1-alpha OS=Bos taurus GN=HIF1A PE=2 SV=1//0
GOAT_ENSBTAP00000050056	102	48	43	609	597	666	5.45952	2.60306	2.62057	29.674	28.882	32.0425	64.3333	624	3.56105	30.1995	3.08415	1.02e-21	6.37e-20	RNF145	sp|Q96MT1|RN145_HUMAN RING finger protein 145 OS=Homo sapiens GN=RNF145 PE=2 SV=2//1.01106e-10	--	GO:0046872//GO:0008270//GO:0005515	--
GOAT_ENSBTAP00000050069	8	4	6	255	269	235	1.00664	0.509957	0.859624	29.2098	30.5939	26.5797	6	253	0.792074	28.7945	5.18401	7.09e-33	1.83e-30	ZNF664	sp|Q8N3J9|ZN664_HUMAN Zinc finger protein 664 OS=Homo sapiens GN=ZNF664 PE=2 SV=1//7.35111e-29	GO:0005634//GO:0005622	GO:0008270//GO:0003676	--
GOAT_ENSBTAP00000050148	3468	5277	4284	1377	1240	1394	846.04	1304.33	1189.97	305.809	273.421	305.684	4343	1337	1113.45	294.971	-1.91638	1.31e-08	8.21e-08		-//-
GOAT_ENSBTAP00000050222	23336	25607	24957	13884	12084	12515	4475.21	4975.48	5449.45	2423.86	2094.58	2157.33	24633.3	12827.7	4966.72	2225.26	-1.15832	2.21e-14	3.97e-13	Rpl17	sp|P24049|RL17_RAT 60S ribosomal protein L17 OS=Rattus norvegicus GN=Rpl17 PE=2 SV=3//2.80433e-17	GO:0015934//GO:0005840//GO:0030529//GO:0005622	GO:0003735	GO:0006412
GOAT_ENSBTAP00000050234	1701	2060	1488	913	851	1035	329.732	404.589	328.423	161.114	149.103	180.341	1749.67	933	354.248	163.519	-1.1153	9.44e-12	1.05e-10	AK1	sp|P00571|KAD1_PIG Adenylate kinase isoenzyme 1 OS=Sus scrofa GN=AK1 PE=1 SV=1//1.92455e-18	GO:0005737//GO:0005886//GO:0001520	GO:0019205//GO:0016301//GO:0004017//GO:0000166//GO:0016740//GO:0005524	GO:0006139//GO:0046034//GO:0016310//GO:0007050
GOAT_ENSBTAP00000050275	3168	4135	3181	1746	1640	1729	1061.77	1404.14	1213.9	532.714	496.808	520.881	3494.67	1705	1226.6	516.801	-1.24699	3.49e-10	2.91e-09	CYCS	sp|P62896|CYC_SHEEP Cytochrome c OS=Ovis aries GN=CYCS PE=1 SV=2//9.57807e-72	GO:0005739//GO:0005758//GO:0070469	GO:0020037//GO:0046872//GO:0005506//GO:0009055	GO:0006915//GO:0022900//GO:0042743
GOAT_ENSBTAP00000050712	5452	6911	5447	3558	3614	3758	605.316	777.422	688.584	359.615	362.672	375.043	5936.67	3643.33	690.441	365.776	-0.916555	3.71e-09	2.57e-08	Tecr	sp|Q9CY27|TECR_MOUSE Very-long-chain enoyl-CoA reductase OS=Mus musculus GN=Tecr PE=1 SV=1//3.32268e-16
GOAT_ENSBTAP00000050729	3605	4133	3633	1752	1672	1877	2020.01	2346.41	2317.86	893.692	846.807	945.391	3790.33	1767	2228.1	895.297	-1.31537	1.83e-17	5.71e-16	COX7C	sp|P00430|COX7C_BOVIN Cytochrome c oxidase subunit 7C, mitochondrial OS=Bos taurus GN=COX7C PE=1 SV=3//1.16832e-39	GO:0005743//GO:0016021//GO:0016020//GO:0005739	GO:0004129	--
GOAT_ENSBTAP00000050806	328	202	161	1121	1095	1073	22.2776	13.9007	12.4507	69.3115	67.2215	65.5078	230.333	1096.33	16.2097	67.3469	2.05476	7e-10	5.54e-09	ADRBK1	sp|P21146|ARBK1_BOVIN Beta-adrenergic receptor kinase 1 OS=Bos taurus GN=ADRBK1 PE=1 SV=1//0	GO:0005737//GO:0016020//GO:0005624//GO:0005829//GO:0005622	GO:0031755//GO:0031694//GO:0004674//GO:0000166//GO:0005543//GO:0016740//GO:0004713//GO:0004672//GO:0005524//GO:0047696//GO:0004703//GO:0016301//GO:0005515//GO:0016772	GO:0018107//GO:0018105//GO:0016310//GO:0006468//GO:0045988//GO:0007165//GO:0060048//GO:0009966//GO:0007213//GO:0006886//GO:0007217//GO:0002026//GO:0007186//GO:0002029//GO:0038032//GO:0003108//GO:0007507//GO:0031623//GO:0002031
GOAT_ENSBTAP00000050811	5	10	2	296	265	291	0.302374	0.612722	0.137714	16.2956	14.485	15.8185	5.66667	284	0.350937	15.533	5.46799	6.22e-37	2.81e-34	ALCAM	sp|Q9BH13|CD166_BOVIN CD166 antigen OS=Bos taurus GN=ALCAM PE=2 SV=1//0
GOAT_ENSBTAP00000050827	41	53	31	422	585	527	1.59818	2.09318	1.37587	14.9747	20.6109	18.465	41.6667	511.333	1.68907	18.0169	3.41504	1.44e-20	7.38e-19	FAM115A	sp|A5PJN5|F115A_BOVIN Protein FAM115A OS=Bos taurus GN=FAM115A PE=2 SV=1//8.97763e-12
GOAT_ENSBTAP00000051307	17909	17674	18554	13514	14554	12924	1148.92	1148.79	1355.28	789.234	843.915	745.267	18045.7	13664	1217.66	792.805	-0.619075	1.19e-10	1.08e-09	2017-09-04	sp|Q4R4X5|SEPT4_MACFA Septin-4 OS=Macaca fascicularis GN=SEPT4 PE=2 SV=1//2.18164e-10	GO:0005737//GO:0005856//GO:0031105//GO:0005815	GO:0003924//GO:0000166//GO:0005525	GO:0007049//GO:0051301
GOAT_ENSBTAP00000051318	64	81	65	298	360	352	7.21742	9.25499	8.3462	30.5931	36.6947	35.6815	70	336.667	8.27287	34.3231	2.05272	9.54e-08	5.13e-07	RNF41	sp|Q5R7T5|RNF41_PONAB E3 ubiquitin-protein ligase NRDP1 OS=Pongo abelii GN=RNF41 PE=2 SV=1//0	GO:0005634//GO:0000151	GO:0008270//GO:0005515//GO:0046872//GO:0004842	GO:0016567
GOAT_ENSBTAP00000051455	3584	4360	3594	1999	1868	2035	2471.69	3046.5	2822.13	1255	1164.4	1261.5	3846	1967.33	2780.11	1226.97	-1.18004	6.53e-13	9e-12	ATP5E	sp|P05632|ATP5E_BOVIN ATP synthase subunit epsilon, mitochondrial OS=Bos taurus GN=ATP5E PE=1 SV=4//4.08377e-22	GO:0045261//GO:0000275//GO:0016020//GO:0005739//GO:0005743//GO:0005753	GO:0046933//GO:0046961	GO:0006810//GO:0015992//GO:0006811//GO:0015986//GO:0006754
GOAT_ENSBTAP00000051539	3210	3558	2967	1993	1943	1957	427.939	480.587	450.368	241.874	234.125	234.512	3245	1964.33	452.965	236.837	-0.935503	3e-15	6.27e-14	NSMCE1	sp|Q3T0X7|NSE1_BOVIN Non-structural maintenance of chromosomes element 1 homolog OS=Bos taurus GN=NSMCE1 PE=2 SV=2//1.01801e-57	GO:0030915	GO:0008270//GO:0005515//GO:0004842	GO:0016567//GO:0035556//GO:2001022
GOAT_ENSBTAP00000051651	85	71	23	596	618	700	4.36085	3.69062	1.34355	27.8357	28.6576	32.2811	59.6667	638	3.13167	29.5915	3.24018	7.12e-24	6.29e-22	CDH13	sp|Q3B7N0|CAD13_BOVIN Cadherin-13 OS=Bos taurus GN=CDH13 PE=2 SV=1//0	GO:0009897//GO:0016020//GO:0005886	GO:0005509//GO:0005515//GO:0055100//GO:0042803	GO:0007155//GO:0007156
GOAT_ENSBTAP00000051767-D2	96	57	73	499	563	513	11.8714	7.14159	10.2784	56.1741	62.9272	57.0225	75.3333	525	9.76381	58.708	2.58804	1.21e-14	2.27e-13	ARMCX3	sp|Q5R9J3|ARMX3_PONAB Armadillo repeat-containing X-linked protein 3 OS=Pongo abelii GN=ARMCX3 PE=2 SV=1//2.4906e-177	GO:0005739//GO:0031307	GO:0005488//GO:0005515	GO:0034613//GO:0045944
GOAT_ENSBTAP00000051902	2151	2103	1731	1580	1511	1445	352.229	348.91	322.742	235.53	223.639	212.692	1995	1512	341.294	223.954	-0.607812	2.64e-10	2.24e-09	Rab24	sp|P35290|RAB24_MOUSE Ras-related protein Rab-24 OS=Mus musculus GN=Rab24 PE=1 SV=2//2.31088e-16	GO:0030139//GO:0031226//GO:0005737//GO:0030667//GO:0016020//GO:0005776//GO:0005739//GO:0005886//GO:0005622//GO:0005768//GO:0005634//GO:0000139	GO:0000166//GO:0030742//GO:0003924//GO:0019002//GO:0019003//GO:0005515//GO:0005525	GO:0007165//GO:0006886//GO:0045055//GO:0043001//GO:0017157//GO:0006810//GO:0006913//GO:0035272//GO:0006184//GO:0007264//GO:0030100//GO:0007032//GO:0015031
[truncated: 1,597 more rows]

## Sheet: CON001 vs. EA001
Gene ID	CON001-readcount	CON001-adjusted-readcount	EA001-readcount	EA001-adjusted-readcount	CON001-rpkm	EA001-rpkm	log2.Fold_change.	pvalue	Corrected-pvalue	Gene name	Blast swiss prot	cellular_component	molecular_function	biological_process
[truncated: 3,073 more rows]

## Sheet: CON002 vs. EA002
Gene ID	CON002-readcount	CON002-adjusted-readcount	EA002-readcount	EA002-adjusted-readcount	CON002-rpkm	EA002-rpkm	log2.Fold_change.	pvalue	Corrected pvalue	Gene nanme	Blast swiss prot	cellular_component	molecular_function	biological_process
[truncated: 4,525 more rows]

[truncated: 2 more sheets: CON003vs. EA003, Neuropeptide genes]
