# Supplementary material for: Exploring the Mechanisms of Electroacupuncture-Induced Analgesia through RNA Sequencing of the Periaqueductal Gray
Source: Int J Mol Sci. 2017 Dec 25;19(1):2. doi: 10.3390/ijms19010002 (PMC5795954; doi:10.3390/ijms19010002)
Supplement: Supplementary file 1 [file ijms-19-00002-s001.zip › Table S2-GO and KEGG analysis.xlsx]

## Sheet: GO
GO_accession	Description	Term_type	Over_represented_pValue	Corrected_pValue	Up	Up_Gene_names	Down	Down_Gene_names
GO:0005737	cytoplasm	cellular_component	7.7884e-61	1.2037e-56	908	GOAT_ENSP00000360569,GOAT_ENSP00000295408,GOAT_ENSBTAP00000022470,GOAT_ENSBTAP00000010532,GOAT_ENSBTAP00000024993,GOAT_ENSBTAP00000002028,GOAT_ENSP00000380132,GOAT_ENSP00000259455,GOAT_ENSBTAP00000009785,goat_GLEAN_10003105,GOAT_ENSP00000250457,GOAT_ENSP00000380794,GOAT_ENSBTAP00000008272,GOAT_ENSP00000408108,GOAT_ENSP00000353098,GOAT_ENSP00000362405,GOAT_ENSBTAP00000040372,GOAT_ENSBTAP0000000790…	489	GOAT_ENSBTAP00000016785,GOAT_ENSBTAP00000008352,GOAT_ENSBTAP00000048183,GOAT_ENSBTAP00000020452,GOAT_ENSP00000304229,GOAT_ENSP00000357555,GOAT_ENSP00000369757,GOAT_ENSBTAP00000028853,GOAT_ENSP00000386621,GOAT_ENSBTAP00000013845,GOAT_ENSBTAP00000004431,GOAT_ENSP00000402597,GOAT_ENSP00000376811,GOAT_ENSBTAP00000019928,GOAT_ENSBTAP00000018778,Novel00115,GOAT_ENSP00000007516,GOAT_ENSP00000367550,GOAT…
GO:0044444	cytoplasmic part	cellular_component	8.8446e-49	6.8347e-45	615	GOAT_ENSP00000264381,GOAT_ENSBTAP00000006275,GOAT_ENSP00000380006,GOAT_ENSP00000269122,GOAT_ENSP00000217971,GOAT_ENSP00000362621,GOAT_ENSBTAP00000021325,GOAT_ENSBTAP00000053644,GOAT_ENSBTAP00000011022,GOAT_ENSBTAP00000033188,GOAT_ENSP00000359506,GOAT_ENSBTAP00000023877,Novel02819,GOAT_ENSBTAP00000027473,GOAT_ENSP00000377673,GOAT_ENSP00000216044,GOAT_ENSP00000361158,GOAT_ENSP00000252444,GOAT_ENSP0…	397	GOAT_ENSBTAP00000011762,GOAT_ENSBTAP00000031959,GOAT_ENSBTAP00000027614,GOAT_ENSP00000253452,GOAT_ENSBTAP00000024621,GOAT_ENSBTAP00000011403,GOAT_ENSP00000259632,GOAT_ENSP00000346483,GOAT_ENSP00000278572,GOAT_ENSBTAP00000050222,GOAT_ENSBTAP00000007189,goat_GLEAN_10020080,GOAT_ENSBTAP00000003545,goat_GLEAN_10017954,goat_GLEAN_10011380,GOAT_ENSP00000368130,GOAT_ENSBTAP00000009152,GOAT_ENSP000003846…
GO:0044424	intracellular part	cellular_component	8.8516e-46	4.56e-42	1143	GOAT_ENSP00000217971,GOAT_ENSP00000362621,GOAT_ENSP00000356507,GOAT_ENSBTAP00000013951-D2,GOAT_ENSP00000341280,GOAT_ENSBTAP00000006275,GOAT_ENSP00000264381,GOAT_ENSP00000377673,Novel02819,GOAT_ENSP00000359506,GOAT_ENSP00000413303,GOAT_ENSP00000407834,GOAT_ENSBTAP00000023877,GOAT_ENSBTAP00000053644,GOAT_ENSP00000303427,GOAT_ENSP00000262719,GOAT_ENSP00000333537,GOAT_ENSP00000216044,GOAT_ENSP0000025…	583	GOAT_ENSBTAP00000011762,GOAT_ENSBTAP00000024621,GOAT_ENSBTAP00000027614,goat_GLEAN_10017954,GOAT_ENSBTAP00000003545,goat_GLEAN_10020080,GOAT_ENSP00000346483,GOAT_ENSBTAP00000012920,GOAT_ENSP00000368130,GOAT_ENSBTAP00000023106,GOAT_ENSP00000379374,GOAT_ENSBTAP00000004751,GOAT_ENSP00000233609,goat_GLEAN_10017591,Novel01164,GOAT_ENSBTAP00000045096,GOAT_ENSP00000413950,GOAT_ENSBTAP00000008068,GOAT_EN…
GO:0005622	intracellular	cellular_component	3.1982e-44	1.2357e-40	1226	GOAT_ENSBTAP00000018760,GOAT_ENSBTAP00000006593,GOAT_ENSP00000379253,GOAT_ENSP00000338266,GOAT_ENSP00000300134,GOAT_ENSBTAP00000022907,GOAT_ENSP00000350009,GOAT_ENSP00000336729,GOAT_ENSP00000342564,GOAT_ENSP00000316032,GOAT_ENSP00000282382,GOAT_ENSBTAP00000017903,GOAT_ENSBTAP00000002933,GOAT_ENSBTAP00000039739,GOAT_ENSP00000409204,GOAT_ENSBTAP00000023134,GOAT_ENSP00000417257,GOAT_ENSP00000357597,…	590	GOAT_ENSP00000227251,GOAT_ENSBTAP00000028364,GOAT_ENSBTAP00000031119,GOAT_ENSP00000379868,GOAT_ENSBTAP00000050234,Novel02241,GOAT_ENSBTAP00000015875-D2,GOAT_ENSBTAP00000014888,goat_GLEAN_10000507,GOAT_ENSP00000258081,GOAT_ENSBTAP00000022078,GOAT_ENSBTAP00000025851,GOAT_ENSBTAP00000007327,GOAT_ENSBTAP00000020719,GOAT_ENSP00000383155,goat_GLEAN_10010645,GOAT_ENSP00000362744,GOAT_ENSBTAP00000051455,…
GO:0005623	cell	cellular_component	2.8877e-39	7.4384e-36	1336	GOAT_ENSP00000263246,GOAT_ENSP00000301972,GOAT_ENSBTAP00000038377,GOAT_ENSP00000384399,GOAT_ENSBTAP00000006709,GOAT_ENSP00000373772,GOAT_ENSBTAP00000021218,GOAT_ENSBTAP00000017563,GOAT_ENSP00000404718,GOAT_ENSP00000287497,GOAT_ENSP00000351086,GOAT_ENSBTAP00000016739,GOAT_ENSBTAP00000008609,GOAT_ENSBTAP00000017997,GOAT_ENSBTAP00000015066,GOAT_ENSP00000268638,GOAT_ENSP00000324701,GOAT_ENSBTAP000000…	594	GOAT_ENSP00000400591,GOAT_ENSBTAP00000044670,GOAT_ENSP00000369461,GOAT_ENSBTAP00000021980,GOAT_ENSBTAP00000026387,GOAT_ENSBTAP00000017158,GOAT_ENSBTAP00000044075,GOAT_ENSBTAP00000010212,GOAT_ENSBTAP00000034759,GOAT_ENSBTAP00000029147,GOAT_ENSP00000271843,GOAT_ENSBTAP00000000926,GOAT_ENSP00000389351,GOAT_ENSBTAP00000018091,GOAT_ENSBTAP00000021860,GOAT_ENSP00000300965,GOAT_ENSBTAP00000029256,GOAT_E…
GO:0044464	cell part	cellular_component	2.8877e-39	7.4384e-36	1336	GOAT_ENSBTAP00000006011,GOAT_ENSBTAP00000002357,GOAT_ENSBTAP00000009418,goat_GLEAN_10000441,GOAT_ENSBTAP00000009683,GOAT_ENSP00000287239,GOAT_ENSP00000379602,GOAT_ENSP00000348010,GOAT_ENSP00000275189,goat_GLEAN_10006974,GOAT_ENSBTAP00000002433,GOAT_ENSP00000378201,GOAT_ENSP00000268171,GOAT_ENSBTAP00000004389,GOAT_ENSBTAP00000008751,GOAT_ENSP00000025008,Novel00299,GOAT_ENSP00000261991,GOAT_ENSP000…	594	GOAT_ENSBTAP00000022576,GOAT_ENSP00000291901,GOAT_ENSP00000315147,GOAT_ENSBTAP00000003190,GOAT_ENSP00000344572,GOAT_ENSP00000085068,GOAT_ENSBTAP00000027627,GOAT_ENSBTAP00000026632,GOAT_ENSP00000387219,GOAT_ENSBTAP00000053003-D5,GOAT_ENSP00000380362,GOAT_ENSP00000365280,GOAT_ENSBTAP00000011377,GOAT_ENSP00000233893,GOAT_ENSBTAP00000027713,GOAT_ENSBTAP00000042463,GOAT_ENSP00000265564,GOAT_ENSP000002…
GO:0043226	organelle	cellular_component	1.3887e-37	3.0659e-34	1016	GOAT_ENSP00000344666,GOAT_ENSBTAP00000007900,GOAT_ENSP00000322804,goat_GLEAN_10006665,GOAT_ENSP00000409717,GOAT_ENSBTAP00000026319,GOAT_ENSP00000420863,goat_GLEAN_10001750,GOAT_ENSP00000316881,GOAT_ENSP00000381817,GOAT_ENSBTAP00000006418,GOAT_ENSBTAP00000003517,GOAT_ENSP00000261845,GOAT_ENSP00000360569,GOAT_ENSBTAP00000002028,GOAT_ENSBTAP00000010532,GOAT_ENSBTAP00000024993,GOAT_ENSBTAP00000009785…	521	GOAT_ENSP00000357555,GOAT_ENSP00000304229,GOAT_ENSBTAP00000028853,GOAT_ENSP00000369757,GOAT_ENSBTAP00000013845,GOAT_ENSP00000269601,GOAT_ENSBTAP00000004431,GOAT_ENSP00000402597,goat_GLEAN_10018065,GOAT_ENSP00000357901,GOAT_ENSP00000376811,GOAT_ENSP00000326531,GOAT_ENSBTAP00000016785,GOAT_ENSBTAP00000008352,GOAT_ENSBTAP00000020452,GOAT_ENSBTAP00000048183,GOAT_ENSBTAP00000031798,GOAT_ENSBTAP0000000…
GO:0043229	intracellular organelle	cellular_component	5.1299e-37	9.9103e-34	1008	GOAT_ENSP00000309591,GOAT_ENSP00000349351,GOAT_ENSBTAP00000007628,GOAT_ENSP00000304292,GOAT_ENSBTAP00000037502,GOAT_ENSP00000327716,GOAT_ENSBTAP00000007391,GOAT_ENSP00000402760,GOAT_ENSP00000336775,GOAT_ENSP00000254480,GOAT_ENSBTAP00000012812,GOAT_ENSBTAP00000017503,GOAT_ENSBTAP00000038567,GOAT_ENSP00000385083,GOAT_ENSBTAP00000036510,GOAT_ENSBTAP00000000201,GOAT_ENSP00000251076,GOAT_ENSP000004142…	521	GOAT_ENSBTAP00000000306,GOAT_ENSP00000417651,GOAT_ENSBTAP00000018478,GOAT_ENSBTAP00000040732,GOAT_ENSBTAP00000024745,GOAT_ENSBTAP00000051539,goat_GLEAN_10012260,GOAT_ENSBTAP00000008319,GOAT_ENSP00000322016,goat_GLEAN_10002201,GOAT_ENSBTAP00000006026,GOAT_ENSBTAP00000024326,goat_GLEAN_10000549,GOAT_ENSBTAP00000019979,GOAT_ENSBTAP00000019451,GOAT_ENSBTAP00000024335,GOAT_ENSBTAP00000026420,GOAT_ENSP…
GO:0043227	membrane-bounded organelle	cellular_component	8.7727e-28	1.5065e-24	914	GOAT_ENSP00000401336,GOAT_ENSP00000227868,GOAT_ENSBTAP00000002383,GOAT_ENSP00000344504,GOAT_ENSBTAP00000004617,GOAT_ENSBTAP00000026068,GOAT_ENSBTAP00000022183,GOAT_ENSP00000258341,GOAT_ENSP00000331983,GOAT_ENSBTAP00000013018,GOAT_ENSP00000324560,GOAT_ENSBTAP00000008292,GOAT_ENSBTAP00000027633,GOAT_ENSP00000390625,GOAT_ENSP00000320893,GOAT_ENSBTAP00000019296,GOAT_ENSP00000346791,GOAT_ENSP000002674…	440	goat_GLEAN_10006161,GOAT_ENSP00000309175,GOAT_ENSBTAP00000012485,GOAT_ENSP00000379219,GOAT_ENSP00000363970,GOAT_ENSBTAP00000004190,GOAT_ENSBTAP00000035795,GOAT_ENSP00000257017,GOAT_ENSBTAP00000040484,GOAT_ENSP00000356001,GOAT_ENSBTAP00000025322,GOAT_ENSBTAP00000025586,GOAT_ENSP00000387180,GOAT_ENSBTAP00000011016,GOAT_ENSBTAP00000001045,GOAT_ENSBTAP00000021249,GOAT_ENSBTAP00000012183,goat_GLEAN_10…
GO:0043231	intracellular membrane-bounded organelle	cellular_component	1.6289e-27	2.5175e-24	907	GOAT_ENSP00000333537,GOAT_ENSP00000252444,GOAT_ENSP00000262719,GOAT_ENSP00000303427,GOAT_ENSP00000302647,GOAT_ENSP00000368259,goat_GLEAN_10006442,GOAT_ENSP00000341280,GOAT_ENSBTAP00000006275,GOAT_ENSP00000264381,GOAT_ENSP00000217971,GOAT_ENSP00000362621,GOAT_ENSP00000413303,GOAT_ENSP00000407834,GOAT_ENSBTAP00000023877,GOAT_ENSP00000359506,Novel02819,GOAT_ENSP00000377673,GOAT_ENSBTAP00000041402,GO…	440	GOAT_ENSP00000346483,GOAT_ENSBTAP00000012920,goat_GLEAN_10017954,GOAT_ENSP00000368130,GOAT_ENSBTAP00000011762,GOAT_ENSBTAP00000027614,GOAT_ENSBTAP00000024621,Novel01164,goat_GLEAN_10017591,GOAT_ENSP00000413950,GOAT_ENSBTAP00000045096,GOAT_ENSP00000379374,GOAT_ENSBTAP00000004751,GOAT_ENSBTAP00000023106,GOAT_ENSBTAP00000012973,GOAT_ENSP00000376956,GOAT_ENSP00000361759-D2,GOAT_ENSBTAP00000022546,GOA…
GO:0044422	organelle part	cellular_component	2.0875e-23	2.933e-20	563	GOAT_ENSP00000347325,GOAT_ENSP00000290158,GOAT_ENSP00000327821,GOAT_ENSP00000280979,GOAT_ENSP00000350325,GOAT_ENSBTAP00000004831,GOAT_ENSBTAP00000002582,GOAT_ENSBTAP00000026682,GOAT_ENSBTAP00000006848,GOAT_ENSBTAP00000001294,GOAT_ENSBTAP00000008991,GOAT_ENSBTAP00000002661,GOAT_ENSBTAP00000000819,GOAT_ENSP00000378323,GOAT_ENSBTAP00000040493,GOAT_ENSBTAP00000009615,GOAT_ENSP00000312625,GOAT_ENSBTAP…	316	GOAT_ENSBTAP00000050275,GOAT_ENSP00000384411,GOAT_ENSP00000260746,GOAT_ENSBTAP00000005628,GOAT_ENSBTAP00000024326,goat_GLEAN_10000549,GOAT_ENSBTAP00000024745,GOAT_ENSBTAP00000040732,goat_GLEAN_10012260,GOAT_ENSBTAP00000051539,GOAT_ENSP00000322016,GOAT_ENSP00000314343,GOAT_ENSP00000264065,GOAT_ENSBTAP00000006026,goat_GLEAN_10002201,GOAT_ENSP00000417651,GOAT_ENSBTAP00000018478,GOAT_ENSP00000377640,…
GO:0044446	intracellular organelle part	cellular_component	1.0859e-22	1.3986e-19	549	GOAT_ENSBTAP00000016514,GOAT_ENSBTAP00000009607,GOAT_ENSBTAP00000011175,GOAT_ENSP00000269886,GOAT_ENSBTAP00000009950,goat_GLEAN_10020512,GOAT_ENSP00000233607,GOAT_ENSP00000258682,goat_GLEAN_10016229,GOAT_ENSBTAP00000008106,GOAT_ENSBTAP00000000504,GOAT_ENSBTAP00000051767-D2,GOAT_ENSP00000392466,GOAT_ENSBTAP00000007481,GOAT_ENSBTAP00000015405,GOAT_ENSP00000367309,GOAT_ENSBTAP00000011818,GOAT_ENSP00…	313	goat_GLEAN_10020081,GOAT_ENSBTAP00000002642,GOAT_ENSBTAP00000024788,GOAT_ENSP00000330937,GOAT_ENSBTAP00000009684,GOAT_ENSBTAP00000051902,GOAT_ENSBTAP00000017178,GOAT_ENSBTAP00000015358,GOAT_ENSBTAP00000013208,GOAT_ENSP00000422122,GOAT_ENSBTAP00000040410,GOAT_ENSBTAP00000003190,GOAT_ENSP00000291901,GOAT_ENSBTAP00000022576,GOAT_ENSP00000357384,GOAT_ENSBTAP00000027627,GOAT_ENSBTAP00000016153,GOAT_EN…
GO:0032991	macromolecular complex	cellular_component	5.5807e-22	6.6346e-19	414	GOAT_ENSBTAP00000053718,GOAT_ENSBTAP00000006418,GOAT_ENSBTAP00000003517,GOAT_ENSBTAP00000017150,goat_GLEAN_10006665,GOAT_ENSBTAP00000053499,GOAT_ENSP00000387654,GOAT_ENSP00000391106,GOAT_ENSP00000380794,GOAT_ENSBTAP00000019219,GOAT_ENSP00000296490,GOAT_ENSP00000362405,GOAT_ENSP00000353098,GOAT_ENSBTAP00000004880,GOAT_ENSBTAP00000045426,GOAT_ENSBTAP00000022470,GOAT_ENSP00000360569,GOAT_ENSBTAP0000…	316	GOAT_ENSP00000269601,GOAT_ENSP00000402597,GOAT_ENSBTAP00000034172,goat_GLEAN_10018065,GOAT_ENSP00000376811,GOAT_ENSP00000357555,GOAT_ENSP00000304229,GOAT_ENSBTAP00000014035,GOAT_ENSP00000369757,GOAT_ENSBTAP00000013845,GOAT_ENSBTAP00000009325,GOAT_ENSBTAP00000020452,GOAT_ENSBTAP00000048183,GOAT_ENSBTAP00000001791-D2,GOAT_ENSBTAP00000023183,GOAT_ENSP00000326531,GOAT_ENSBTAP00000016296,GOAT_ENSBTAP0…
GO:0031090	organelle membrane	cellular_component	2.6574e-20	2.9336e-17	218	GOAT_ENSBTAP00000010292,GOAT_ENSP00000276461,GOAT_ENSP00000379602,GOAT_ENSP00000376367,GOAT_ENSBTAP00000017106,GOAT_ENSBTAP00000019322,GOAT_ENSP00000400101,GOAT_ENSBTAP00000048820,GOAT_ENSBTAP00000021892,GOAT_ENSBTAP00000040563,GOAT_ENSP00000377766,GOAT_ENSP00000261514,GOAT_ENSBTAP00000031479,GOAT_ENSBTAP00000007448,GOAT_ENSBTAP00000017658,GOAT_ENSP00000255499,goat_GLEAN_10013265,GOAT_ENSP0000042…	113	GOAT_ENSBTAP00000003190,GOAT_ENSP00000357384,GOAT_ENSP00000389732,GOAT_ENSP00000258424,GOAT_ENSP00000359098,GOAT_ENSBTAP00000000100,GOAT_ENSBTAP00000013668,GOAT_ENSBTAP00000050729,GOAT_ENSBTAP00000011377,GOAT_ENSP00000348205,GOAT_ENSP00000357285,GOAT_ENSBTAP00000001071,GOAT_ENSBTAP00000012973,GOAT_ENSP00000392779,GOAT_ENSBTAP00000023744,goat_GLEAN_10020081,GOAT_ENSBTAP00000051902,goat_GLEAN_10017…
GO:0005739	mitochondrion	cellular_component	2.2283e-19	2.2959e-16	146	goat_GLEAN_10020512,GOAT_ENSBTAP00000031013,GOAT_ENSP00000307305,GOAT_ENSP00000267568,GOAT_ENSBTAP00000040765,GOAT_ENSP00000380989,GOAT_ENSBTAP00000041402,GOAT_ENSP00000311984,GOAT_ENSBTAP00000051767-D2,GOAT_ENSP00000276569,GOAT_ENSBTAP00000008106,GOAT_ENSBTAP00000013790,goat_GLEAN_10013077,GOAT_ENSBTAP00000027016,GOAT_ENSP00000313050,GOAT_ENSP00000318883,GOAT_ENSP00000269122,GOAT_ENSBTAP00000011…	183	GOAT_ENSBTAP00000004751,GOAT_ENSP00000411302,goat_GLEAN_10020081,GOAT_ENSP00000341082,GOAT_ENSP00000399831,GOAT_ENSP00000416515,GOAT_ENSBTAP00000051902,GOAT_ENSBTAP00000023735,goat_GLEAN_10017591,GOAT_ENSBTAP00000012810,GOAT_ENSP00000330937,GOAT_ENSP00000413950,GOAT_ENSBTAP00000031959,GOAT_ENSBTAP00000027614,GOAT_ENSP00000253452,GOAT_ENSBTAP00000011403,GOAT_ENSBTAP00000007189,GOAT_ENSBTAP00000001…
GO:0070469	respiratory chain	cellular_component	1.1873e-17	1.0794e-14	0		34	GOAT_ENSP00000362058,goat_GLEAN_10008729,GOAT_ENSP00000330937,GOAT_ENSBTAP00000044670,GOAT_ENSBTAP00000000100,GOAT_ENSP00000359098,goat_GLEAN_10005558,GOAT_ENSP00000330787,GOAT_ENSBTAP00000050275,GOAT_ENSBTAP00000016957,GOAT_ENSBTAP00000019529,GOAT_ENSBTAP00000005628,GOAT_ENSBTAP00000029003,GOAT_ENSP00000389732,GOAT_ENSP00000309565,GOAT_ENSBTAP00000028853,goat_GLEAN_10020081,GOAT_ENSBTAP000000242…
GO:0005840	ribosome	cellular_component	1.1471e-16	9.331e-14	7	GOAT_ENSP00000288670,GOAT_ENSP00000351086,goat_GLEAN_10019953,GOAT_ENSBTAP00000047104,GOAT_ENSBTAP00000013988,GOAT_ENSBTAP00000018457,GOAT_ENSBTAP00000001064-D3	106	GOAT_ENSBTAP00000007036,goat_GLEAN_10008437,GOAT_ENSP00000350750,GOAT_ENSBTAP00000052105,GOAT_ENSBTAP00000005015,GOAT_ENSP00000377640,GOAT_ENSP00000416110,GOAT_ENSP00000262584,GOAT_ENSBTAP00000002642,GOAT_ENSP00000225430,GOAT_ENSBTAP00000034395,GOAT_ENSBTAP00000024788,GOAT_ENSP00000362208,GOAT_ENSBTAP00000001465,GOAT_ENSP00000379888,goat_GLEAN_10008378,GOAT_ENSBTAP00000000814,goat_GLEAN_10019484,…
GO:0044429	mitochondrial part	cellular_component	4.5721e-16	3.5331e-13	49	GOAT_ENSP00000368259,GOAT_ENSP00000352497,GOAT_ENSP00000005178,GOAT_ENSP00000367309,GOAT_ENSP00000290597,GOAT_ENSBTAP00000053353,goat_GLEAN_10013077,GOAT_ENSBTAP00000008106,GOAT_ENSBTAP00000023881,GOAT_ENSBTAP00000051767-D2,GOAT_ENSP00000351132,GOAT_ENSP00000362160,GOAT_ENSBTAP00000040765,goat_GLEAN_10012713,goat_GLEAN_10020512,GOAT_ENSBTAP00000029285,GOAT_ENSBTAP00000007636,GOAT_ENSP00000400101,…	95	GOAT_ENSBTAP00000025174,GOAT_ENSP00000422122,GOAT_ENSP00000215565,GOAT_ENSBTAP00000026635,GOAT_ENSBTAP00000013630,GOAT_ENSP00000369176,GOAT_ENSBTAP00000020832,GOAT_ENSBTAP00000022759,GOAT_ENSBTAP00000007189,GOAT_ENSBTAP00000001069,GOAT_ENSP00000253452,GOAT_ENSBTAP00000027614,GOAT_ENSBTAP00000031959,GOAT_ENSBTAP00000014801,GOAT_ENSP00000268668,GOAT_ENSBTAP00000016013,GOAT_ENSP00000300688,GOAT_ENSB…
GO:0030529	ribonucleoprotein complex	cellular_component	1.3713e-15	1.0092e-12	51	GOAT_ENSBTAP00000000301,GOAT_ENSP00000385942,GOAT_ENSP00000366604,GOAT_ENSP00000351086,GOAT_ENSP00000365444,goat_GLEAN_10014628,goat_GLEAN_10015943,GOAT_ENSBTAP00000027991,GOAT_ENSP00000354370,GOAT_ENSP00000401371,GOAT_ENSP00000401336,GOAT_ENSP00000262215,GOAT_ENSP00000316042,GOAT_ENSBTAP00000027067,GOAT_ENSP00000387939,GOAT_ENSP00000383587,GOAT_ENSBTAP00000005281,GOAT_ENSBTAP00000024313,GOAT_ENS…	134	GOAT_ENSP00000380465,GOAT_ENSBTAP00000028983,goat_GLEAN_10019484,GOAT_ENSP00000424870,GOAT_ENSBTAP00000027147,GOAT_ENSBTAP00000000814,goat_GLEAN_10008378,GOAT_ENSP00000379888,GOAT_ENSBTAP00000001465,GOAT_ENSBTAP00000026387,GOAT_ENSP00000225430,GOAT_ENSP00000262584,GOAT_ENSP00000416110,GOAT_ENSBTAP00000005015,GOAT_ENSBTAP00000016296,GOAT_ENSBTAP00000052105,GOAT_ENSP00000400591,GOAT_ENSBTAP00000007…
GO:0005740	mitochondrial envelope	cellular_component	1.2574e-14	8.8329e-12	38	GOAT_ENSBTAP00000007636,GOAT_ENSP00000400101,GOAT_ENSP00000362659,GOAT_ENSBTAP00000019322,GOAT_ENSP00000376367,GOAT_ENSP00000272433,GOAT_ENSP00000350325,GOAT_ENSP00000420527,GOAT_ENSP00000419879,GOAT_ENSBTAP00000009440,GOAT_ENSBTAP00000019429,GOAT_ENSP00000005178,GOAT_ENSP00000423014,GOAT_ENSP00000368259,GOAT_ENSP00000352497,GOAT_ENSP00000403357,GOAT_ENSBTAP00000053353,GOAT_ENSP00000300107,GOAT_E…	82	GOAT_ENSP00000318024,GOAT_ENSBTAP00000023642,GOAT_ENSBTAP00000020018,GOAT_ENSBTAP00000015810,GOAT_ENSP00000392779,GOAT_ENSBTAP00000007982,GOAT_ENSBTAP00000027191,goat_GLEAN_10002201,GOAT_ENSP00000348205,GOAT_ENSBTAP00000001993,GOAT_ENSP00000348886,GOAT_ENSP00000203407,GOAT_ENSBTAP00000025586,GOAT_ENSBTAP00000016993,GOAT_ENSP00000417651,GOAT_ENSBTAP00000050729,GOAT_ENSBTAP00000025322,GOAT_ENSP0000…
GO:0031966	mitochondrial membrane	cellular_component	1.9251e-14	1.2936e-11	38	GOAT_ENSP00000368259,GOAT_ENSP00000352497,GOAT_ENSP00000403357,GOAT_ENSP00000005178,GOAT_ENSP00000423014,GOAT_ENSP00000300107,GOAT_ENSBTAP00000025068,GOAT_ENSP00000367309,GOAT_ENSP00000413575,GOAT_ENSP00000388809,goat_GLEAN_10014874,GOAT_ENSBTAP00000053353,GOAT_ENSP00000260649,goat_GLEAN_10013077,GOAT_ENSBTAP00000018013,GOAT_ENSBTAP00000051767-D2,GOAT_ENSBTAP00000023881,GOAT_ENSBTAP00000008106,GO…	78	GOAT_ENSBTAP00000025174,GOAT_ENSP00000422122,GOAT_ENSP00000380318-D2,GOAT_ENSP00000215565,GOAT_ENSBTAP00000022759,GOAT_ENSBTAP00000020832,GOAT_ENSBTAP00000011458-D2,GOAT_ENSP00000369176,GOAT_ENSBTAP00000003832,GOAT_ENSBTAP00000007189,GOAT_ENSBTAP00000024600,GOAT_ENSBTAP00000022949,GOAT_ENSBTAP00000001069,GOAT_ENSP00000253452,GOAT_ENSBTAP00000014801,GOAT_ENSP00000417656,GOAT_ENSBTAP00000031959,GOA…
GO:0019866	organelle inner membrane	cellular_component	4.4929e-14	2.8932e-11	27	goat_GLEAN_10012713,GOAT_ENSBTAP00000040765,GOAT_ENSP00000409204,GOAT_ENSP00000362160,GOAT_ENSBTAP00000023881,GOAT_ENSP00000277865,GOAT_ENSP00000260649,goat_GLEAN_10013077,GOAT_ENSP00000388809,GOAT_ENSP00000367309,GOAT_ENSP00000300107,GOAT_ENSP00000005178,GOAT_ENSP00000423014,GOAT_ENSP00000403357,GOAT_ENSP00000352497,GOAT_ENSBTAP00000009440,GOAT_ENSBTAP00000014803,GOAT_ENSBTAP00000019429,GOAT_ENS…	69	GOAT_ENSBTAP00000034279,GOAT_ENSBTAP00000029003,GOAT_ENSP00000319992,GOAT_ENSBTAP00000018505,goat_GLEAN_10020081,goat_GLEAN_10017591,GOAT_ENSBTAP00000044670,GOAT_ENSBTAP00000012810,GOAT_ENSP00000330937,GOAT_ENSP00000362058,Novel02535,GOAT_ENSBTAP00000017710,GOAT_ENSP00000363190,GOAT_ENSP00000301939,GOAT_ENSBTAP00000019529,GOAT_ENSBTAP00000016957,goat_GLEAN_10002368,GOAT_ENSBTAP00000038273,GOAT_EN…
GO:0005743	mitochondrial inner membrane	cellular_component	9.9329e-14	6.1405e-11	23	GOAT_ENSBTAP00000019322,GOAT_ENSP00000400101,GOAT_ENSP00000362659,GOAT_ENSBTAP00000007636,GOAT_ENSBTAP00000019429,GOAT_ENSBTAP00000009440,GOAT_ENSP00000419879,GOAT_ENSP00000420527,GOAT_ENSP00000272433,GOAT_ENSP00000388809,GOAT_ENSP00000367309,GOAT_ENSP00000300107,GOAT_ENSP00000403357,GOAT_ENSP00000352497,GOAT_ENSP00000005178,GOAT_ENSP00000423014,GOAT_ENSP00000362160,goat_GLEAN_10012713,GOAT_ENSBT…	69	GOAT_ENSP00000317159,GOAT_ENSBTAP00000025322,GOAT_ENSBTAP00000050729,GOAT_ENSBTAP00000016993,GOAT_ENSBTAP00000025586,GOAT_ENSP00000203407,GOAT_ENSP00000348886,GOAT_ENSBTAP00000001993,GOAT_ENSP00000348205,GOAT_ENSBTAP00000027191,GOAT_ENSBTAP00000007982,GOAT_ENSP00000392779,GOAT_ENSBTAP00000020018,GOAT_ENSBTAP00000023642,GOAT_ENSBTAP00000028853,GOAT_ENSBTAP00000043418,GOAT_ENSBTAP00000024209,GOAT_E…
GO:0044391	ribosomal subunit	cellular_component	6.182e-13	3.6747e-10	2	GOAT_ENSBTAP00000047104,goat_GLEAN_10019953	61	GOAT_ENSBTAP00000005015,GOAT_ENSBTAP00000052105,GOAT_ENSP00000350750,goat_GLEAN_10010645,GOAT_ENSBTAP00000024788,GOAT_ENSP00000225430,GOAT_ENSBTAP00000002642,GOAT_ENSP00000262584,GOAT_ENSBTAP00000004190,GOAT_ENSBTAP00000027627,GOAT_ENSP00000416110,GOAT_ENSP00000377640,GOAT_ENSP00000376811,GOAT_ENSBTAP00000019738,GOAT_ENSBTAP00000040182,GOAT_ENSP00000287038,GOAT_ENSP00000357555,GOAT_ENSBTAP0000000…
GO:0005746	mitochondrial respiratory chain	cellular_component	3.2841e-12	1.6919e-09	0		24	GOAT_ENSBTAP00000024600,goat_GLEAN_10020081,GOAT_ENSP00000253452,GOAT_ENSBTAP00000014801,GOAT_ENSP00000417656,GOAT_ENSP00000389732,GOAT_ENSBTAP00000029003,GOAT_ENSBTAP00000016013,GOAT_ENSBTAP00000005628,GOAT_ENSBTAP00000016993,GOAT_ENSP00000268668,GOAT_ENSBTAP00000019529,GOAT_ENSBTAP00000016957,GOAT_ENSBTAP00000027191,GOAT_ENSP00000330787,GOAT_ENSP00000215565,goat_GLEAN_10005558,GOAT_ENSP00000359…
GO:0005747	mitochondrial respiratory chain complex I	cellular_component	1.0679e-11	4.7157e-09	0		19	GOAT_ENSBTAP00000016957,GOAT_ENSBTAP00000027191,GOAT_ENSBTAP00000019529,goat_GLEAN_10005558,GOAT_ENSP00000330787,GOAT_ENSP00000215565,GOAT_ENSP00000330937,GOAT_ENSP00000369176,GOAT_ENSBTAP00000044670,GOAT_ENSBTAP00000020018,GOAT_ENSBTAP00000000100,GOAT_ENSP00000362058,GOAT_ENSBTAP00000024600,GOAT_ENSBTAP00000029003,GOAT_ENSP00000389732,GOAT_ENSBTAP00000014801,GOAT_ENSBTAP00000016013,GOAT_ENSBTAP0…
GO:0022626	cytosolic ribosome	cellular_component	1.0128e-11	4.7157e-09	3	GOAT_ENSBTAP00000001064-D3,goat_GLEAN_10019953,GOAT_ENSBTAP00000047104	50	GOAT_ENSBTAP00000053003-D5,goat_GLEAN_10010124,GOAT_ENSBTAP00000031700,GOAT_ENSBTAP00000023183,goat_GLEAN_10014924,GOAT_ENSBTAP00000021587,GOAT_ENSBTAP00000015358,GOAT_ENSP00000367806,GOAT_ENSBTAP00000033015,GOAT_ENSBTAP00000012544,GOAT_ENSBTAP00000018491,GOAT_ENSP00000278572,GOAT_ENSP00000371103,goat_GLEAN_10020080,goat_GLEAN_10012260,GOAT_ENSBTAP00000025484,GOAT_ENSBTAP00000027713,GOAT_ENSBTAP0…
GO:0030964	NADH dehydrogenase complex	cellular_component	1.0679e-11	4.7157e-09	0		19	GOAT_ENSP00000330787,GOAT_ENSP00000215565,goat_GLEAN_10005558,GOAT_ENSBTAP00000019529,GOAT_ENSBTAP00000027191,GOAT_ENSBTAP00000016957,GOAT_ENSP00000362058,GOAT_ENSBTAP00000000100,GOAT_ENSBTAP00000020018,GOAT_ENSP00000330937,GOAT_ENSP00000369176,GOAT_ENSBTAP00000044670,GOAT_ENSBTAP00000024600,GOAT_ENSBTAP00000016013,GOAT_ENSBTAP00000005628,GOAT_ENSP00000268668,GOAT_ENSBTAP00000014801,GOAT_ENSP0000…
GO:0045271	respiratory chain complex I	cellular_component	1.0679e-11	4.7157e-09	0		19	GOAT_ENSBTAP00000019529,GOAT_ENSBTAP00000027191,GOAT_ENSBTAP00000016957,GOAT_ENSP00000330787,GOAT_ENSP00000215565,goat_GLEAN_10005558,GOAT_ENSBTAP00000000100,GOAT_ENSBTAP00000020018,GOAT_ENSP00000330937,GOAT_ENSP00000369176,GOAT_ENSBTAP00000044670,GOAT_ENSP00000362058,GOAT_ENSBTAP00000024600,GOAT_ENSBTAP00000014801,GOAT_ENSP00000389732,GOAT_ENSBTAP00000029003,GOAT_ENSBTAP00000005628,GOAT_ENSBTAP0…
GO:0031967	organelle envelope	cellular_component	1.5977e-11	6.8588e-09	77	GOAT_ENSBTAP00000010292,GOAT_ENSP00000420527,GOAT_ENSP00000350325,GOAT_ENSP00000280979,GOAT_ENSP00000327821,GOAT_ENSP00000290158,GOAT_ENSP00000376367,GOAT_ENSBTAP00000019322,GOAT_ENSBTAP00000001064-D3,GOAT_ENSBTAP00000021892,GOAT_ENSP00000400101,GOAT_ENSBTAP00000037502,GOAT_ENSP00000255499,GOAT_ENSP00000382545,GOAT_ENSP00000378914,GOAT_ENSBTAP00000029285,GOAT_ENSBTAP00000053365,GOAT_ENSBTAP000000…	88	GOAT_ENSBTAP00000024326,GOAT_ENSBTAP00000024209,Novel02352,GOAT_ENSBTAP00000005628,GOAT_ENSP00000389732,GOAT_ENSP00000384411,GOAT_ENSBTAP00000050275,GOAT_ENSP00000258424,goat_GLEAN_10008729,GOAT_ENSP00000359098,GOAT_ENSBTAP00000000100,GOAT_ENSBTAP00000016409,GOAT_ENSBTAP00000050729,GOAT_ENSBTAP00000016993,GOAT_ENSP00000417651,GOAT_ENSBTAP00000001993,goat_GLEAN_10002201,GOAT_ENSP00000348205,GOAT_E…
GO:0044445	cytosolic part	cellular_component	3.2123e-11	1.3065e-08	15	GOAT_ENSBTAP00000003033,GOAT_ENSP00000363050,GOAT_ENSBTAP00000047104,GOAT_ENSBTAP00000002028,GOAT_ENSP00000202017,GOAT_ENSBTAP00000010961,GOAT_ENSBTAP00000001064-D3,GOAT_ENSP00000418287,GOAT_ENSBTAP00000009950,goat_GLEAN_10020512,GOAT_ENSP00000398661,GOAT_ENSP00000379855,Novel02819,GOAT_ENSP00000359683,goat_GLEAN_10019953	61	GOAT_ENSP00000357555,GOAT_ENSP00000287038,goat_GLEAN_10006161,GOAT_ENSP00000363676,GOAT_ENSBTAP00000003472,goat_GLEAN_10010645,GOAT_ENSP00000360473,GOAT_ENSBTAP00000004190,GOAT_ENSBTAP00000040182,GOAT_ENSBTAP00000027627,GOAT_ENSP00000376811,goat_GLEAN_10010124,GOAT_ENSBTAP00000053003-D5,GOAT_ENSBTAP00000023183,goat_GLEAN_10014924,goat_GLEAN_10014132,GOAT_ENSBTAP00000012544,GOAT_ENSBTAP00000033015…
GO:0031975	envelope	cellular_component	5.3199e-11	2.1082e-08	80	GOAT_ENSBTAP00000053365,GOAT_ENSBTAP00000007636,goat_GLEAN_10006731,GOAT_ENSP00000255499,GOAT_ENSP00000312435,GOAT_ENSP00000378914,GOAT_ENSBTAP00000029285,GOAT_ENSP00000382545,GOAT_ENSBTAP00000037502,GOAT_ENSBTAP00000007628,GOAT_ENSBTAP00000001064-D3,GOAT_ENSBTAP00000019322,GOAT_ENSP00000400101,GOAT_ENSBTAP00000021892,GOAT_ENSP00000280979,GOAT_ENSP00000327821,GOAT_ENSP00000376367,GOAT_ENSP0000029…	88	GOAT_ENSP00000392779,GOAT_ENSP00000336799,GOAT_ENSBTAP00000020018,goat_GLEAN_10002201,GOAT_ENSP00000348205,GOAT_ENSP00000417651,GOAT_ENSBTAP00000016993,GOAT_ENSBTAP00000001993,GOAT_ENSBTAP00000016409,GOAT_ENSBTAP00000050729,goat_GLEAN_10008729,GOAT_ENSBTAP00000000100,GOAT_ENSP00000359098,GOAT_ENSBTAP00000050275,GOAT_ENSP00000384411,GOAT_ENSP00000258424,GOAT_ENSBTAP00000005628,GOAT_ENSP00000389732…
GO:0044455	mitochondrial membrane part	cellular_component	6.8125e-11	2.6322e-08	8	goat_GLEAN_10014874,GOAT_ENSBTAP00000053353,GOAT_ENSP00000368259,GOAT_ENSBTAP00000007636,GOAT_ENSP00000351132,GOAT_ENSBTAP00000016739,GOAT_ENSBTAP00000051767-D2,GOAT_ENSP00000262891	42	GOAT_ENSBTAP00000024600,GOAT_ENSP00000253452,GOAT_ENSBTAP00000014801,GOAT_ENSP00000417656,GOAT_ENSBTAP00000031959,GOAT_ENSP00000300688,GOAT_ENSBTAP00000016993,GOAT_ENSBTAP00000016013,goat_GLEAN_10015090,GOAT_ENSP00000268668,GOAT_ENSBTAP00000027191,GOAT_ENSP00000215565,GOAT_ENSP00000348205,GOAT_ENSBTAP00000020018,GOAT_ENSP00000369176,GOAT_ENSBTAP00000024326,GOAT_ENSBTAP00000018505,goat_GLEAN_10020…
GO:0030135	coated vesicle	cellular_component	8.9407e-11	3.3702e-08	55	GOAT_ENSP00000378110,GOAT_ENSBTAP00000002357,GOAT_ENSBTAP00000029225,GOAT_ENSBTAP00000006011,GOAT_ENSP00000348602,GOAT_ENSBTAP00000001039,GOAT_ENSP00000393912,GOAT_ENSP00000274496,GOAT_ENSBTAP00000008296,goat_GLEAN_10001965,GOAT_ENSP00000379602,GOAT_ENSBTAP00000026372,GOAT_ENSBTAP00000021559,GOAT_ENSBTAP00000038597,GOAT_ENSBTAP00000004831,GOAT_ENSP00000268171,GOAT_ENSP00000342970,GOAT_ENSP0000035…	5	GOAT_ENSBTAP00000022460,GOAT_ENSP00000309415,GOAT_ENSP00000222008,GOAT_ENSBTAP00000001071,GOAT_ENSBTAP00000001518
GO:0043234	protein complex	cellular_component	1.5972e-10	5.61e-08	371	GOAT_ENSP00000355024,GOAT_ENSBTAP00000053310,GOAT_ENSBTAP00000016858,GOAT_ENSP00000194900,GOAT_ENSP00000312435,GOAT_ENSP00000402695-D2,GOAT_ENSBTAP00000021556,GOAT_ENSBTAP00000022801,GOAT_ENSP00000420608,goat_GLEAN_10019017,goat_GLEAN_10013265,GOAT_ENSP00000219252,GOAT_ENSP00000418447,goat_GLEAN_10006731,GOAT_ENSP00000355051,GOAT_ENSP00000287239,GOAT_ENSBTAP00000009683,GOAT_ENSP00000276461,GOAT_E…	184	GOAT_ENSP00000380362,GOAT_ENSBTAP00000011377,GOAT_ENSBTAP00000001071,GOAT_ENSP00000336799,GOAT_ENSBTAP00000003190,GOAT_ENSP00000291901,GOAT_ENSP00000357384,GOAT_ENSP00000357876,GOAT_ENSBTAP00000040410,GOAT_ENSP00000422122,GOAT_ENSBTAP00000022382,GOAT_ENSP00000400664,GOAT_ENSP00000265564,goat_GLEAN_10020081,Novel02224,GOAT_ENSBTAP00000017178,GOAT_ENSP00000330937,GOAT_ENSP00000301396,GOAT_ENSBTAP00…
GO:0005829	cytosol	cellular_component	1.2429e-09	3.9201e-07	105	GOAT_ENSP00000420527,GOAT_ENSP00000350325,GOAT_ENSBTAP00000047104,GOAT_ENSP00000363050,GOAT_ENSBTAP00000009615,GOAT_ENSBTAP00000031225,GOAT_ENSBTAP00000010292,GOAT_ENSP00000394352,GOAT_ENSP00000415786,GOAT_ENSP00000378323,GOAT_ENSBTAP00000024812,GOAT_ENSP00000279488,GOAT_ENSP00000306124,GOAT_ENSP00000418287,GOAT_ENSP00000418447,GOAT_ENSP00000305355,GOAT_ENSP00000382004,GOAT_ENSBTAP00000010961,GOA…	96	GOAT_ENSBTAP00000040182,GOAT_ENSBTAP00000027627,GOAT_ENSP00000414826,GOAT_ENSP00000360473,GOAT_ENSBTAP00000026632,GOAT_ENSP00000363676,GOAT_ENSBTAP00000003472,GOAT_ENSBTAP00000009687,GOAT_ENSBTAP00000013079,GOAT_ENSBTAP00000011377,GOAT_ENSBTAP00000027713,goat_GLEAN_10012260,GOAT_ENSP00000371103,GOAT_ENSP00000361759-D2,GOAT_ENSP00000387219,GOAT_ENSBTAP00000012544,GOAT_ENSBTAP00000033015,GOAT_ENSBT…
GO:0030136	clathrin-coated vesicle	cellular_component	2.0295e-09	6.1501e-07	45	goat_GLEAN_10014874,GOAT_ENSP00000418169,GOAT_ENSP00000358142,GOAT_ENSP00000361869,GOAT_ENSP00000387756,GOAT_ENSP00000380006,GOAT_ENSP00000397726,GOAT_ENSBTAP00000040563,GOAT_ENSP00000377766,GOAT_ENSBTAP00000029564,GOAT_ENSBTAP00000053353,GOAT_ENSP00000360155,GOAT_ENSBTAP00000037502,GOAT_ENSBTAP00000030712,GOAT_ENSP00000269122,GOAT_ENSBTAP00000007628,GOAT_ENSP00000354111,GOAT_ENSBTAP00000014152,G…	4	GOAT_ENSBTAP00000001518,GOAT_ENSBTAP00000022460,GOAT_ENSP00000309415,GOAT_ENSP00000222008
GO:0043228	non-membrane-bounded organelle	cellular_component	2.045e-08	5.4492e-06	347	GOAT_ENSP00000386259,GOAT_ENSP00000401371,GOAT_ENSP00000383599,GOAT_ENSBTAP00000040327,GOAT_ENSP00000377107,goat_GLEAN_10011790,GOAT_ENSP00000263674,GOAT_ENSBTAP00000005982,GOAT_ENSP00000383977,GOAT_ENSBTAP00000010107,GOAT_ENSBTAP00000006351,GOAT_ENSBTAP00000015410,GOAT_ENSBTAP00000053291,GOAT_ENSBTAP00000001839,GOAT_ENSBTAP00000025590,GOAT_ENSBTAP00000028053,GOAT_ENSP00000258198,GOAT_ENSBTAP0000…	199	goat_GLEAN_10014413,GOAT_ENSP00000361238,GOAT_ENSBTAP00000005789,GOAT_ENSBTAP00000027388,GOAT_ENSP00000411177,GOAT_ENSBTAP00000041770,goat_GLEAN_10014924,goat_GLEAN_10014132,GOAT_ENSP00000221742,GOAT_ENSP00000370569,GOAT_ENSBTAP00000037041,GOAT_ENSBTAP00000010843,GOAT_ENSBTAP00000025484,GOAT_ENSBTAP00000024391,GOAT_ENSBTAP00000001465,GOAT_ENSBTAP00000028499,GOAT_ENSBTAP00000007028,GOAT_ENSP000002…
GO:0043232	intracellular non-membrane-bounded organelle	cellular_component	2.045e-08	5.4492e-06	347	GOAT_ENSBTAP00000005166,GOAT_ENSBTAP00000021594,GOAT_ENSBTAP00000021310,GOAT_ENSBTAP00000001977,GOAT_ENSP00000393379,GOAT_ENSP00000376438,GOAT_ENSP00000360860,GOAT_ENSP00000352581,GOAT_ENSP00000396519,GOAT_ENSBTAP00000017171,GOAT_ENSBTAP00000012605,GOAT_ENSP00000411761,GOAT_ENSP00000356224,GOAT_ENSP00000262820,GOAT_ENSP00000262428,goat_GLEAN_10009031,GOAT_ENSP00000261965,GOAT_ENSP00000416060,GOAT…	199	GOAT_ENSP00000380762,GOAT_ENSBTAP00000016778,GOAT_ENSBTAP00000027147,GOAT_ENSP00000424870,GOAT_ENSBTAP00000000814,goat_GLEAN_10008378,GOAT_ENSBTAP00000023078,GOAT_ENSP00000379888,GOAT_ENSP00000380465,GOAT_ENSBTAP00000014131,GOAT_ENSP00000418259,goat_GLEAN_10019484,GOAT_ENSBTAP00000052105,GOAT_ENSBTAP00000007036,GOAT_ENSP00000225430,GOAT_ENSBTAP00000017710,GOAT_ENSP00000160827,GOAT_ENSBTAP00000048…
GO:0015934	large ribosomal subunit	cellular_component	2.2793e-08	5.9707e-06	1	goat_GLEAN_10019953	38	goat_GLEAN_10014924,GOAT_ENSBTAP00000023183,GOAT_ENSBTAP00000031700,goat_GLEAN_10010124,GOAT_ENSBTAP00000048954,GOAT_ENSBTAP00000053003-D5,GOAT_ENSBTAP00000015358,GOAT_ENSBTAP00000027614,GOAT_ENSBTAP00000010176,goat_GLEAN_10020080,GOAT_ENSBTAP00000040732,GOAT_ENSP00000371103,GOAT_ENSBTAP00000050222,GOAT_ENSP00000222247,GOAT_ENSBTAP00000020452,GOAT_ENSBTAP00000009152,GOAT_ENSBTAP00000018910,GOAT_E…
GO:0005575	cellular_component	cellular_component	3.6054e-08	9.2869e-06	1458	goat_GLEAN_10003105,GOAT_ENSP00000295408,GOAT_ENSBTAP00000002028,GOAT_ENSBTAP00000040372,GOAT_ENSP00000362405,GOAT_ENSP00000270530,GOAT_ENSBTAP00000008272,GOAT_ENSP00000250457,GOAT_ENSP00000408108,GOAT_ENSP00000409717,goat_GLEAN_10001750,GOAT_ENSP00000344666,goat_GLEAN_10006665,GOAT_ENSP00000384896,GOAT_ENSBTAP00000008216,GOAT_ENSBTAP00000009536,GOAT_ENSP00000413575,GOAT_ENSBTAP00000053664,GOAT_E…	656	GOAT_ENSBTAP00000016785,GOAT_ENSP00000326531,GOAT_ENSBTAP00000048183,GOAT_ENSP00000386621,GOAT_ENSBTAP00000028853,GOAT_ENSP00000369757,GOAT_ENSBTAP00000013845,GOAT_ENSP00000402597,GOAT_ENSP00000376811,GOAT_ENSBTAP00000004431,GOAT_ENSP00000269601,GOAT_ENSP00000367550,GOAT_ENSBTAP00000018778,GOAT_ENSBTAP00000007349,GOAT_ENSBTAP00000027964,goat_GLEAN_10004657,GOAT_ENSBTAP00000019461,GOAT_ENSP0000022…
GO:0042995	cell projection	cellular_component	3.7666e-08	9.543e-06	187	GOAT_ENSBTAP00000035199,GOAT_ENSBTAP00000028704,GOAT_ENSBTAP00000019501,GOAT_ENSP00000365589,GOAT_ENSP00000264638,GOAT_ENSBTAP00000027619,goat_GLEAN_10006442,GOAT_ENSBTAP00000053572,GOAT_ENSBTAP00000012724,GOAT_ENSP00000359683,GOAT_ENSBTAP00000007132,GOAT_ENSBTAP00000004397,GOAT_ENSBTAP00000033188,GOAT_ENSP00000306382,GOAT_ENSP00000318486,GOAT_ENSP00000359506,GOAT_ENSBTAP00000023877,GOAT_ENSP0000…	31	GOAT_ENSBTAP00000017362,GOAT_ENSP00000278572,GOAT_ENSP00000333873,GOAT_ENSP00000408910,GOAT_ENSBTAP00000024621,GOAT_ENSP00000367086,GOAT_ENSP00000359070,GOAT_ENSBTAP00000052447,GOAT_ENSP00000291823,GOAT_ENSP00000336799,GOAT_ENSBTAP00000023744,GOAT_ENSBTAP00000044793,GOAT_ENSP00000414826,GOAT_ENSP00000394419,GOAT_ENSP00000260746,GOAT_ENSP00000334100,GOAT_ENSBTAP00000031119,GOAT_ENSP00000219150,GOA…
GO:0022625	cytosolic large ribosomal subunit	cellular_component	1.633e-07	3.5054e-05	1	goat_GLEAN_10019953	28	GOAT_ENSBTAP00000015358,GOAT_ENSBTAP00000025963,goat_GLEAN_10006161,GOAT_ENSP00000363676,goat_GLEAN_10010124,GOAT_ENSBTAP00000031700,GOAT_ENSP00000287038,GOAT_ENSBTAP00000053003-D5,GOAT_ENSBTAP00000023183,goat_GLEAN_10014924,GOAT_ENSBTAP00000004190,GOAT_ENSBTAP00000009152,GOAT_ENSBTAP00000020452,GOAT_ENSP00000262584,GOAT_ENSBTAP00000002642,GOAT_ENSBTAP00000048183,GOAT_ENSP00000225430,GOAT_ENSBTAP…
GO:0022627	cytosolic small ribosomal subunit	cellular_component	1.7718e-07	3.7511e-05	1	GOAT_ENSBTAP00000047104	23	goat_GLEAN_10016337,GOAT_ENSBTAP00000027627,GOAT_ENSP00000416110,GOAT_ENSBTAP00000013079,goat_GLEAN_10009821,goat_GLEAN_10012260,GOAT_ENSBTAP00000027713,GOAT_ENSBTAP00000025484,goat_GLEAN_10017954,GOAT_ENSP00000389351,GOAT_ENSBTAP00000018491,GOAT_ENSBTAP00000052105,GOAT_ENSP00000278572,GOAT_ENSP00000233609,GOAT_ENSBTAP00000033015,GOAT_ENSP00000367806,GOAT_ENSBTAP00000012544,GOAT_ENSBTAP0000000320…
GO:0043005	neuron projection	cellular_component	1.9066e-07	3.982e-05	102	GOAT_ENSP00000353590,GOAT_ENSBTAP00000033805,GOAT_ENSBTAP00000053353,GOAT_ENSBTAP00000043670,GOAT_ENSP00000361475,goat_GLEAN_10014874,GOAT_ENSP00000418169,GOAT_ENSP00000358142,GOAT_ENSP00000361869,GOAT_ENSP00000359506,GOAT_ENSP00000318486,GOAT_ENSP00000344456,GOAT_ENSBTAP00000032011,GOAT_ENSP00000413575,GOAT_ENSP00000353582,GOAT_ENSBTAP00000051949,GOAT_ENSBTAP00000004397,GOAT_ENSP00000391056,GOAT…	15	GOAT_ENSP00000367086,GOAT_ENSP00000408910,GOAT_ENSBTAP00000024621,GOAT_ENSP00000334100,GOAT_ENSBTAP00000010212,GOAT_ENSBTAP00000044075,GOAT_ENSP00000359070,GOAT_ENSBTAP00000031119,GOAT_ENSBTAP00000000568,GOAT_ENSP00000221742,GOAT_ENSP00000336799,GOAT_ENSP00000361087,goat_GLEAN_10005005,GOAT_ENSBTAP00000023744,GOAT_ENSP00000414826
GO:0097458	neuron part	cellular_component	2.6859e-07	5.5348e-05	122	goat_GLEAN_10014874,GOAT_ENSP00000418169,GOAT_ENSP00000344456,GOAT_ENSBTAP00000032011,GOAT_ENSP00000413575,GOAT_ENSP00000353582,GOAT_ENSBTAP00000033805,GOAT_ENSBTAP00000053208,GOAT_ENSP00000351155,GOAT_ENSP00000262820,GOAT_ENSBTAP00000006628,GOAT_ENSP00000383392,GOAT_ENSBTAP00000051949,GOAT_ENSP00000265113,GOAT_ENSP00000391056,GOAT_ENSP00000287766,GOAT_ENSP00000367384,goat_GLEAN_10001066,GOAT_ENS…	16	GOAT_ENSP00000334100,GOAT_ENSBTAP00000010212,GOAT_ENSBTAP00000044075,GOAT_ENSBTAP00000031119,GOAT_ENSP00000221742,GOAT_ENSBTAP00000000568,GOAT_ENSP00000361087,goat_GLEAN_10005005,GOAT_ENSP00000342136,GOAT_ENSP00000408910,GOAT_ENSBTAP00000024621,GOAT_ENSP00000367086,GOAT_ENSP00000359070,GOAT_ENSP00000336799,GOAT_ENSBTAP00000023744,GOAT_ENSP00000414826
GO:0010008	endosome membrane	cellular_component	3.9512e-07	7.9306e-05	38	GOAT_ENSBTAP00000017106,GOAT_ENSBTAP00000028239,GOAT_ENSP00000309376,GOAT_ENSP00000381097,goat_GLEAN_10005012,GOAT_ENSP00000285419,GOAT_ENSBTAP00000007681,GOAT_ENSBTAP00000002383,GOAT_ENSP00000355173,GOAT_ENSP00000327116,GOAT_ENSBTAP00000007762,GOAT_ENSBTAP00000013671,GOAT_ENSP00000345752,GOAT_ENSBTAP00000014803,GOAT_ENSP00000269886,GOAT_ENSBTAP00000026221,GOAT_ENSBTAP00000025590,GOAT_ENSBTAP0000…	4	GOAT_ENSBTAP00000015829,GOAT_ENSBTAP00000008352,GOAT_ENSP00000357285,GOAT_ENSBTAP00000019980
GO:0044440	endosomal part	cellular_component	3.9512e-07	7.9306e-05	38	GOAT_ENSP00000368818,GOAT_ENSP00000307722,GOAT_ENSP00000255499,GOAT_ENSBTAP00000010436,GOAT_ENSP00000412202,GOAT_ENSP00000382545,GOAT_ENSBTAP00000000950,GOAT_ENSP00000312837,GOAT_ENSBTAP00000027499,GOAT_ENSP00000380794,GOAT_ENSP00000362480,GOAT_ENSBTAP00000041069,GOAT_ENSBTAP00000029529,GOAT_ENSBTAP00000018777,GOAT_ENSBTAP00000044998,GOAT_ENSP00000302239,GOAT_ENSBTAP00000031479,GOAT_ENSP000003669…	4	GOAT_ENSP00000357285,GOAT_ENSBTAP00000008352,GOAT_ENSBTAP00000019980,GOAT_ENSBTAP00000015829
GO:0008021	synaptic vesicle	cellular_component	4.3931e-07	8.7046e-05	30	GOAT_ENSBTAP00000038597,GOAT_ENSBTAP00000026372,GOAT_ENSP00000263160,GOAT_ENSP00000357307,GOAT_ENSP00000390148,GOAT_ENSP00000342970,GOAT_ENSP00000348602,GOAT_ENSP00000378110,GOAT_ENSBTAP00000002357,GOAT_ENSBTAP00000006011,GOAT_ENSBTAP00000029225,GOAT_ENSP00000379602,GOAT_ENSP00000231721,GOAT_ENSP00000356155,GOAT_ENSP00000251076,GOAT_ENSBTAP00000009693,GOAT_ENSBTAP00000006628,goat_GLEAN_10005485,G…	2	GOAT_ENSBTAP00000022460,GOAT_ENSP00000222008
GO:0005794	Golgi apparatus	cellular_component	4.9343e-07	9.653e-05	143	GOAT_ENSP00000262820,GOAT_ENSP00000351155,GOAT_ENSP00000262061,GOAT_ENSP00000409153,GOAT_ENSBTAP00000011977,GOAT_ENSP00000350071,GOAT_ENSP00000369862,GOAT_ENSP00000263245,GOAT_ENSP00000411761,GOAT_ENSP00000356224,GOAT_ENSBTAP00000013008,GOAT_ENSP00000272102,GOAT_ENSBTAP00000004844,GOAT_ENSP00000352385,GOAT_ENSP00000244458,GOAT_ENSP00000397726,GOAT_ENSP00000365191,GOAT_ENSP00000352581,GOAT_ENSP000…	31	GOAT_ENSBTAP00000024333,GOAT_ENSBTAP00000027964,GOAT_ENSBTAP00000021860,GOAT_ENSBTAP00000020600,GOAT_ENSBTAP00000014474,Novel02481,GOAT_ENSP00000392330,GOAT_ENSBTAP00000012183,GOAT_ENSBTAP00000010843,GOAT_ENSP00000342136,GOAT_ENSBTAP00000037810,GOAT_ENSP00000221742,goat_GLEAN_10014132,GOAT_ENSBTAP00000004431,GOAT_ENSP00000383155,GOAT_ENSBTAP00000018766,GOAT_ENSP00000309415,GOAT_ENSP00000359070,GO…
GO:0008287	protein serine/threonine phosphatase complex	cellular_component	1.0536e-06	0.00020103	21	GOAT_ENSP00000382545,GOAT_ENSBTAP00000042335,GOAT_ENSP00000349124,GOAT_ENSP00000296490,GOAT_ENSBTAP00000007563,GOAT_ENSP00000418447,GOAT_ENSP00000327255,GOAT_ENSBTAP00000010138,GOAT_ENSP00000262719,GOAT_ENSP00000350071,GOAT_ENSBTAP00000016514,GOAT_ENSBTAP00000017382,GOAT_ENSP00000339769,GOAT_ENSBTAP00000038304,goat_GLEAN_10014874,GOAT_ENSBTAP00000043518,GOAT_ENSP00000378306,GOAT_ENSP00000407834,G…	2	GOAT_ENSP00000254654,GOAT_ENSBTAP00000017178
GO:0030027	lamellipodium	cellular_component	2.3061e-06	0.00040967	38	GOAT_ENSP00000334008,GOAT_ENSBTAP00000027527,GOAT_ENSBTAP00000012605,GOAT_ENSBTAP00000053438,GOAT_ENSBTAP00000024101,GOAT_ENSP00000269187,GOAT_ENSBTAP00000027619,GOAT_ENSBTAP00000029285,goat_GLEAN_10009031,GOAT_ENSP00000312435,GOAT_ENSBTAP00000035199,GOAT_ENSP00000257430,GOAT_ENSBTAP00000022470,GOAT_ENSP00000382004,GOAT_ENSBTAP00000048820,GOAT_ENSBTAP00000023383,GOAT_ENSBTAP00000053345,goat_GLEAN…	6	GOAT_ENSBTAP00000017362,GOAT_ENSBTAP00000007028,GOAT_ENSBTAP00000010212,GOAT_ENSP00000219150,GOAT_ENSP00000376895,GOAT_ENSBTAP00000027388
GO:0015935	small ribosomal subunit	cellular_component	2.9343e-06	0.00051533	1	GOAT_ENSBTAP00000047104	24	GOAT_ENSBTAP00000018491,GOAT_ENSBTAP00000052105,GOAT_ENSP00000278572,goat_GLEAN_10012260,GOAT_ENSBTAP00000025484,GOAT_ENSBTAP00000027713,GOAT_ENSP00000389351,goat_GLEAN_10017954,goat_GLEAN_10009821,goat_GLEAN_10016337,GOAT_ENSP00000416110,GOAT_ENSBTAP00000027627,GOAT_ENSBTAP00000013079,GOAT_ENSBTAP00000053003-D5,GOAT_ENSBTAP00000000814,GOAT_ENSP00000357555,GOAT_ENSP00000379888,GOAT_ENSBTAP0000000…
GO:0031902	late endosome membrane	cellular_component	7.5058e-06	0.0012609	10	GOAT_ENSBTAP00000014803,GOAT_ENSP00000355173,GOAT_ENSP00000285419,GOAT_ENSBTAP00000010436,GOAT_ENSP00000255499,GOAT_ENSP00000307722,GOAT_ENSP00000368818,GOAT_ENSBTAP00000026319,GOAT_ENSBTAP00000013862,GOAT_ENSBTAP00000044998	4	GOAT_ENSBTAP00000015829,GOAT_ENSBTAP00000008352,GOAT_ENSP00000357285,GOAT_ENSBTAP00000019980
GO:0005634	nucleus	cellular_component	8.3604e-06	0.0013746	556	GOAT_ENSBTAP00000006593,GOAT_ENSP00000373772,GOAT_ENSP00000300134,GOAT_ENSP00000316032,GOAT_ENSP00000342564,GOAT_ENSBTAP00000031689,GOAT_ENSBTAP00000012432,GOAT_ENSBTAP00000008609,GOAT_ENSP00000324701,GOAT_ENSBTAP00000017903,GOAT_ENSP00000409204,GOAT_ENSP00000357597,GOAT_ENSP00000268638,GOAT_ENSP00000379406,GOAT_ENSP00000349471,GOAT_ENSP00000260408,GOAT_ENSP00000347711,GOAT_ENSBTAP00000027991,GOA…	240	GOAT_ENSP00000400591,GOAT_ENSP00000227251,GOAT_ENSBTAP00000028364,GOAT_ENSBTAP00000021980,GOAT_ENSBTAP00000026387,GOAT_ENSP00000379868,GOAT_ENSBTAP00000034759,GOAT_ENSBTAP00000044075,GOAT_ENSBTAP00000010212,GOAT_ENSBTAP00000000926,GOAT_ENSP00000389351,GOAT_ENSBTAP00000014888,GOAT_ENSBTAP00000021860,GOAT_ENSP00000300965,GOAT_ENSP00000258081,GOAT_ENSBTAP00000029256,goat_GLEAN_10000507,GOAT_ENSBTAP0…
GO:0030662	coated vesicle membrane	cellular_component	8.6516e-06	0.0014075	21	GOAT_ENSP00000352385,GOAT_ENSP00000393912,GOAT_ENSP00000321845,GOAT_ENSP00000387756,GOAT_ENSP00000358142,GOAT_ENSP00000418169,GOAT_ENSBTAP00000029225,GOAT_ENSP00000379602,GOAT_ENSP00000269122,GOAT_ENSP00000397726,GOAT_ENSP00000377766,GOAT_ENSBTAP00000029564,GOAT_ENSP00000231721,GOAT_ENSBTAP00000009693,goat_GLEAN_10013265,GOAT_ENSBTAP00000004831,GOAT_ENSP00000262061,GOAT_ENSP00000263160,GOAT_ENSBT…	3	GOAT_ENSP00000309415,GOAT_ENSBTAP00000001071,GOAT_ENSBTAP00000001518
GO:0031982	vesicle	cellular_component	2.3339e-05	0.0035363	132	GOAT_ENSP00000310375,GOAT_ENSP00000355173,GOAT_ENSP00000327116,GOAT_ENSBTAP00000008296,GOAT_ENSBTAP00000028221,GOAT_ENSP00000324560,GOAT_ENSP00000414714,GOAT_ENSBTAP00000053718,GOAT_ENSP00000263160,GOAT_ENSP00000320893,GOAT_ENSBTAP00000038597,GOAT_ENSP00000258341,GOAT_ENSBTAP00000021559,GOAT_ENSP00000262348,GOAT_ENSBTAP00000014152,GOAT_ENSBTAP00000029564,GOAT_ENSBTAP00000026526,GOAT_ENSP000003611…	30	GOAT_ENSBTAP00000001049,GOAT_ENSP00000309415,GOAT_ENSBTAP00000004431,GOAT_ENSP00000352471,GOAT_ENSP00000363970,goat_GLEAN_10014132,GOAT_ENSBTAP00000037810,GOAT_ENSP00000221742,goat_GLEAN_10005005,GOAT_ENSBTAP00000008352,GOAT_ENSBTAP00000010212,GOAT_ENSP00000219150,Novel02481,GOAT_ENSP00000300026,GOAT_ENSP00000310572,GOAT_ENSP00000346032,GOAT_ENSBTAP00000020600,GOAT_ENSBTAP00000022460,GOAT_ENSP000…
GO:0012505	endomembrane system	cellular_component	2.6366e-05	0.0039562	137	goat_GLEAN_10008815,GOAT_ENSP00000262215,GOAT_ENSBTAP00000000210,GOAT_ENSBTAP00000014803,GOAT_ENSP00000352834,GOAT_ENSP00000360689,GOAT_ENSP00000320893,GOAT_ENSP00000381817,GOAT_ENSBTAP00000004549,GOAT_ENSP00000220562,GOAT_ENSP00000414714,GOAT_ENSP00000284262,GOAT_ENSBTAP00000020418,goat_GLEAN_10007091,GOAT_ENSP00000265070,GOAT_ENSP00000263062,GOAT_ENSBTAP00000002028,GOAT_ENSP00000300737,GOAT_ENS…	34	GOAT_ENSBTAP00000014035,GOAT_ENSBTAP00000013845,GOAT_ENSP00000309415,GOAT_ENSP00000363970,GOAT_ENSP00000341538,GOAT_ENSBTAP00000036305,GOAT_ENSBTAP00000037810,GOAT_ENSBTAP00000000519,GOAT_ENSP00000342136,goat_GLEAN_10005005,GOAT_ENSBTAP00000044075,GOAT_ENSP00000311447,GOAT_ENSP00000392330,GOAT_ENSBTAP00000017856,GOAT_ENSBTAP00000031119,GOAT_ENSP00000384372,GOAT_ENSP00000222284,GOAT_ENSBTAP0000001…
GO:0030665	clathrin-coated vesicle membrane	cellular_component	5.1498e-05	0.0073694	15	GOAT_ENSBTAP00000029225,GOAT_ENSP00000418169,GOAT_ENSP00000358142,GOAT_ENSP00000387756,GOAT_ENSP00000379602,GOAT_ENSP00000377766,GOAT_ENSP00000397726,GOAT_ENSBTAP00000029564,GOAT_ENSP00000269122,GOAT_ENSBTAP00000009693,GOAT_ENSP00000231721,GOAT_ENSP00000390148,GOAT_ENSBTAP00000026951,GOAT_ENSP00000391056,GOAT_ENSP00000263160	2	GOAT_ENSP00000309415,GOAT_ENSBTAP00000001518
GO:0031410	cytoplasmic vesicle	cellular_component	5.5976e-05	0.0079368	117	GOAT_ENSP00000363050,GOAT_ENSBTAP00000009615,GOAT_ENSBTAP00000029225,GOAT_ENSBTAP00000006011,GOAT_ENSBTAP00000002357,GOAT_ENSP00000379602,goat_GLEAN_10001965,goat_GLEAN_10000441,GOAT_ENSP00000415786,GOAT_ENSBTAP00000040493,GOAT_ENSP00000420527,GOAT_ENSBTAP00000004831,GOAT_ENSBTAP00000026372,GOAT_ENSP00000390148,GOAT_ENSBTAP00000012095,GOAT_ENSP00000268171,GOAT_ENSBTAP00000012721,GOAT_ENSBTAP00000…	26	GOAT_ENSBTAP00000022460,GOAT_ENSP00000349078,GOAT_ENSBTAP00000001071,GOAT_ENSBTAP00000001518,GOAT_ENSBTAP00000042463,GOAT_ENSBTAP00000012973,GOAT_ENSBTAP00000004751,GOAT_ENSP00000222008,GOAT_ENSBTAP00000051902,GOAT_ENSBTAP00000011403,GOAT_ENSP00000309415,GOAT_ENSBTAP00000001049,GOAT_ENSP00000352471,GOAT_ENSP00000363970,GOAT_ENSBTAP00000004431,GOAT_ENSBTAP00000037810,GOAT_ENSP00000221742,goat_GLEA…
GO:0016023	cytoplasmic membrane-bounded vesicle	cellular_component	5.7459e-05	0.008073	111	GOAT_ENSBTAP00000009615,GOAT_ENSP00000363050,GOAT_ENSBTAP00000006011,GOAT_ENSBTAP00000029225,GOAT_ENSBTAP00000002357,GOAT_ENSP00000379602,goat_GLEAN_10001965,GOAT_ENSP00000415786,goat_GLEAN_10000441,GOAT_ENSBTAP00000040493,GOAT_ENSP00000420527,GOAT_ENSBTAP00000004831,GOAT_ENSBTAP00000026372,GOAT_ENSP00000390148,GOAT_ENSP00000268171,GOAT_ENSBTAP00000012095,GOAT_ENSBTAP00000007628,GOAT_ENSP00000309…	21	GOAT_ENSBTAP00000022460,GOAT_ENSBTAP00000001071,GOAT_ENSBTAP00000042463,GOAT_ENSBTAP00000001518,GOAT_ENSBTAP00000012973,GOAT_ENSBTAP00000004751,GOAT_ENSP00000222008,GOAT_ENSBTAP00000051902,GOAT_ENSP00000309415,GOAT_ENSP00000352471,GOAT_ENSBTAP00000004431,GOAT_ENSBTAP00000037810,GOAT_ENSP00000221742,goat_GLEAN_10014132,GOAT_ENSBTAP00000008352,GOAT_ENSP00000219150,GOAT_ENSBTAP00000010212,GOAT_ENSP0…
GO:0005798	Golgi-associated vesicle	cellular_component	6.1948e-05	0.0084726	16	GOAT_ENSP00000268171,GOAT_ENSP00000320893,GOAT_ENSP00000262891,GOAT_ENSBTAP00000021559,GOAT_ENSP00000382545,GOAT_ENSP00000262061,goat_GLEAN_10001965,GOAT_ENSBTAP00000037502,GOAT_ENSP00000269122,GOAT_ENSP00000397726,GOAT_ENSBTAP00000040563,GOAT_ENSP00000352385,GOAT_ENSP00000244458,GOAT_ENSBTAP00000009615,GOAT_ENSP00000393912,GOAT_ENSP00000260408	4	GOAT_ENSBTAP00000001518,Novel02481,GOAT_ENSBTAP00000001071,GOAT_ENSP00000309415
GO:0012506	vesicle membrane	cellular_component	6.7852e-05	0.0091187	38	goat_GLEAN_10006731,GOAT_ENSBTAP00000026951,GOAT_ENSP00000391056,GOAT_ENSBTAP00000021955,goat_GLEAN_10013265,GOAT_ENSBTAP00000009693,GOAT_ENSP00000231721,GOAT_ENSP00000382545,GOAT_ENSP00000262061,GOAT_ENSP00000307722,GOAT_ENSP00000366988,GOAT_ENSBTAP00000040563,GOAT_ENSP00000397726,GOAT_ENSP00000377766,GOAT_ENSP00000261514,GOAT_ENSBTAP00000029564,GOAT_ENSP00000269122,GOAT_ENSP00000321845,GOAT_ENS…	8	GOAT_ENSBTAP00000001518,GOAT_ENSBTAP00000008352,GOAT_ENSBTAP00000012973,GOAT_ENSBTAP00000001071,GOAT_ENSBTAP00000037810,GOAT_ENSBTAP00000051902,GOAT_ENSP00000309415,GOAT_ENSP00000219150
GO:0031988	membrane-bounded vesicle	cellular_component	7.5356e-05	0.0099541	122	GOAT_ENSP00000414714,GOAT_ENSP00000263160,GOAT_ENSP00000324560,GOAT_ENSP00000320893,GOAT_ENSBTAP00000021559,GOAT_ENSP00000258341,GOAT_ENSBTAP00000038597,GOAT_ENSP00000327116,GOAT_ENSBTAP00000008296,GOAT_ENSBTAP00000028221,GOAT_ENSP00000362021,GOAT_ENSBTAP00000018777,GOAT_ENSBTAP00000026951,goat_GLEAN_10013047,GOAT_ENSP00000312837,GOAT_ENSBTAP00000009693,goat_GLEAN_10005485,GOAT_ENSBTAP00000002230…	24	GOAT_ENSBTAP00000004431,GOAT_ENSP00000352471,GOAT_ENSP00000309415,goat_GLEAN_10005005,GOAT_ENSBTAP00000008352,goat_GLEAN_10014132,GOAT_ENSP00000221742,GOAT_ENSBTAP00000037810,GOAT_ENSP00000300026,Novel02481,GOAT_ENSP00000346032,GOAT_ENSBTAP00000010212,GOAT_ENSP00000219150,GOAT_ENSBTAP00000020600,GOAT_ENSBTAP00000022460,GOAT_ENSBTAP00000001518,GOAT_ENSBTAP00000042463,GOAT_ENSP00000336799,GOAT_ENSB…
GO:0005839	proteasome core complex	cellular_component	8.0703e-05	0.010394	0		11	GOAT_ENSP00000271308,GOAT_ENSBTAP00000016918,GOAT_ENSP00000259457,GOAT_ENSBTAP00000017816,GOAT_ENSBTAP00000004984,GOAT_ENSBTAP00000012773,GOAT_ENSBTAP00000028364,GOAT_ENSP00000351314,GOAT_ENSP00000262193,GOAT_ENSBTAP00000003636,GOAT_ENSP00000359910
GO:0044431	Golgi apparatus part	cellular_component	9.0624e-05	0.011575	52	GOAT_ENSBTAP00000023803,GOAT_ENSP00000244458,GOAT_ENSP00000352385,GOAT_ENSP00000254190,GOAT_ENSBTAP00000004844,GOAT_ENSBTAP00000040563,GOAT_ENSP00000397726,GOAT_ENSP00000345528,GOAT_ENSBTAP00000037502,GOAT_ENSP00000269122,GOAT_ENSBTAP00000020418,GOAT_ENSBTAP00000039576,GOAT_ENSP00000409153,GOAT_ENSBTAP00000011977,GOAT_ENSP00000382545,GOAT_ENSP00000365589,GOAT_ENSP00000351155,GOAT_ENSP00000255499,…	10	GOAT_ENSBTAP00000037810,GOAT_ENSBTAP00000001071,GOAT_ENSBTAP00000020600,GOAT_ENSP00000342136,GOAT_ENSBTAP00000001518,GOAT_ENSP00000309415,GOAT_ENSP00000392330,GOAT_ENSP00000260746,Novel02481,GOAT_ENSBTAP00000051902
GO:0016272	prefoldin complex	cellular_component	0.00013576	0.016652	4	GOAT_ENSP00000398661,Novel02819,GOAT_ENSBTAP00000009950,GOAT_ENSP00000202017	5	GOAT_ENSP00000356989,GOAT_ENSBTAP00000022382,GOAT_ENSBTAP00000022078,GOAT_ENSBTAP00000011762,GOAT_ENSP00000360473
GO:0044433	cytoplasmic vesicle part	cellular_component	0.00017453	0.020591	35	GOAT_ENSBTAP00000040493,GOAT_ENSBTAP00000008296,GOAT_ENSBTAP00000024133,GOAT_ENSP00000379602,GOAT_ENSBTAP00000029225,GOAT_ENSP00000393912,GOAT_ENSP00000320893,GOAT_ENSP00000261861,GOAT_ENSBTAP00000007481,GOAT_ENSP00000414714,GOAT_ENSP00000263160,GOAT_ENSP00000390148,GOAT_ENSP00000324560,GOAT_ENSP00000388756,GOAT_ENSBTAP00000004831,GOAT_ENSP00000269122,GOAT_ENSP00000377766,GOAT_ENSP00000397726,GOA…	9	GOAT_ENSP00000309415,GOAT_ENSP00000219150,GOAT_ENSBTAP00000051902,GOAT_ENSBTAP00000037810,GOAT_ENSBTAP00000012973,GOAT_ENSBTAP00000008352,GOAT_ENSBTAP00000020600,GOAT_ENSBTAP00000001518,GOAT_ENSBTAP00000001071
GO:0031256	leading edge membrane	cellular_component	0.00017816	0.020642	24	GOAT_ENSBTAP00000008015,GOAT_ENSP00000411761,GOAT_ENSBTAP00000007132,GOAT_ENSBTAP00000012724,GOAT_ENSBTAP00000053438,GOAT_ENSP00000233607,GOAT_ENSBTAP00000029285,GOAT_ENSP00000269187,GOAT_ENSP00000365589,GOAT_ENSP00000388756,GOAT_ENSP00000257430,GOAT_ENSBTAP00000007628,GOAT_ENSP00000371734,GOAT_ENSP00000386800,goat_GLEAN_10001066,GOAT_ENSP00000360860,GOAT_ENSBTAP00000001839,GOAT_ENSP00000327536,g…	4	GOAT_ENSP00000278572,GOAT_ENSP00000291823,GOAT_ENSBTAP00000027388,GOAT_ENSP00000221742
GO:0030659	cytoplasmic vesicle membrane	cellular_component	0.00023213	0.025088	34	GOAT_ENSP00000379602,GOAT_ENSBTAP00000008296,GOAT_ENSBTAP00000040493,GOAT_ENSP00000393912,GOAT_ENSBTAP00000029225,GOAT_ENSP00000414714,GOAT_ENSP00000263160,GOAT_ENSP00000324560,GOAT_ENSP00000390148,GOAT_ENSP00000320893,GOAT_ENSP00000261861,GOAT_ENSBTAP00000007481,GOAT_ENSBTAP00000004831,GOAT_ENSP00000388756,GOAT_ENSP00000366988,GOAT_ENSP00000269122,GOAT_ENSBTAP00000040563,GOAT_ENSP00000397726,GOA…	8	GOAT_ENSP00000309415,GOAT_ENSP00000219150,GOAT_ENSBTAP00000051902,GOAT_ENSBTAP00000037810,GOAT_ENSBTAP00000001518,GOAT_ENSBTAP00000012973,GOAT_ENSBTAP00000008352,GOAT_ENSBTAP00000001071
GO:0005773	vacuole	cellular_component	0.00026959	0.027777	55	GOAT_ENSBTAP00000007204,GOAT_ENSP00000007414,goat_GLEAN_10000441,GOAT_ENSBTAP00000013671,GOAT_ENSP00000345752,GOAT_ENSBTAP00000040765,GOAT_ENSBTAP00000012331,GOAT_ENSBTAP00000014803,GOAT_ENSP00000355173,GOAT_ENSP00000310375,goat_GLEAN_10004120,GOAT_ENSBTAP00000023218,GOAT_ENSBTAP00000013862,GOAT_ENSBTAP00000026319,GOAT_ENSBTAP00000009615,GOAT_ENSP00000009530,GOAT_ENSP00000324560,GOAT_ENSP00000390…	6	GOAT_ENSP00000398026,GOAT_ENSBTAP00000015829,GOAT_ENSBTAP00000051902,GOAT_ENSP00000363970,GOAT_ENSBTAP00000019980,GOAT_ENSP00000357285
GO:0000502	proteasome complex	cellular_component	0.00036679	0.035429	3	GOAT_ENSBTAP00000002506,GOAT_ENSBTAP00000002028,GOAT_ENSP00000415252	18	GOAT_ENSBTAP00000012773,GOAT_ENSBTAP00000028364,GOAT_ENSP00000357876,GOAT_ENSP00000416650,GOAT_ENSP00000359910,GOAT_ENSP00000310572,GOAT_ENSBTAP00000017816,GOAT_ENSBTAP00000007135,GOAT_ENSBTAP00000028520,GOAT_ENSP00000351314,GOAT_ENSBTAP00000003636,GOAT_ENSP00000262193,GOAT_ENSP00000271308,GOAT_ENSBTAP00000016918,GOAT_ENSP00000259457,GOAT_ENSBTAP00000013845,GOAT_ENSBTAP00000028983,GOAT_ENSBTAP000…
GO:0003735	structural constituent of ribosome	molecular_function	2.0471e-18	1.9774e-15	3	goat_GLEAN_10019953,GOAT_ENSP00000288670,GOAT_ENSBTAP00000013988	100	Novel00115,GOAT_ENSBTAP00000002349,GOAT_ENSBTAP00000019979,goat_GLEAN_10016648,GOAT_ENSBTAP00000031700,GOAT_ENSBTAP00000048954,GOAT_ENSP00000346001,GOAT_ENSP00000367806,GOAT_ENSBTAP00000021587,GOAT_ENSP00000346022,GOAT_ENSBTAP00000027614,GOAT_ENSP00000378396,GOAT_ENSBTAP00000015875-D2,goat_GLEAN_10017954,GOAT_ENSP00000389351,GOAT_ENSBTAP00000010176,GOAT_ENSBTAP00000001991,goat_GLEAN_10020080,GOAT…
GO:0005515	protein binding	molecular_function	1.4005e-12	8.0168e-10	1221	GOAT_ENSBTAP00000051651,GOAT_ENSP00000349124,GOAT_ENSBTAP00000000994,GOAT_ENSP00000354558,GOAT_ENSBTAP00000042267,GOAT_ENSBTAP00000015985,GOAT_ENSBTAP00000001360,GOAT_ENSP00000219865,GOAT_ENSP00000361891,GOAT_ENSP00000402009,GOAT_ENSBTAP00000053836,GOAT_ENSBTAP00000008486,GOAT_ENSP00000360113,GOAT_ENSBTAP00000002506,GOAT_ENSBTAP00000003338,GOAT_ENSBTAP00000019501,GOAT_ENSBTAP00000001658,GOAT_ENSB…	340	GOAT_ENSBTAP00000022759,GOAT_ENSBTAP00000006653,GOAT_ENSBTAP00000010982,GOAT_ENSP00000377469,GOAT_ENSP00000359910,GOAT_ENSBTAP00000017362,GOAT_ENSBTAP00000008883,GOAT_ENSBTAP00000003636,GOAT_ENSP00000268668,GOAT_ENSP00000408910,GOAT_ENSP00000415615,GOAT_ENSP00000359070,Novel00794,GOAT_ENSP00000368699,GOAT_ENSBTAP00000013079,GOAT_ENSP00000310842,GOAT_ENSP00000360473,GOAT_ENSBTAP00000015465,GOAT_EN…
GO:0005198	structural molecule activity	molecular_function	1.6368e-12	8.7228e-10	36	GOAT_ENSP00000263674,GOAT_ENSBTAP00000013988,GOAT_ENSP00000364000,GOAT_ENSBTAP00000009208,GOAT_ENSBTAP00000000734,GOAT_ENSBTAP00000003517,GOAT_ENSBTAP00000025374,GOAT_ENSP00000258341,GOAT_ENSP00000344456,goat_GLEAN_10009031,goat_GLEAN_10001066,GOAT_ENSBTAP00000017997,GOAT_ENSP00000336775,GOAT_ENSP00000252699,GOAT_ENSP00000312435,GOAT_ENSP00000382545,GOAT_ENSBTAP00000012891,GOAT_ENSP00000339184,GO…	121	goat_GLEAN_10010124,GOAT_ENSP00000386655,GOAT_ENSP00000346012,GOAT_ENSBTAP00000023183,goat_GLEAN_10014924,GOAT_ENSBTAP00000000568,GOAT_ENSBTAP00000037041,GOAT_ENSP00000370569,GOAT_ENSBTAP00000019980,GOAT_ENSP00000356001,Novel01976,GOAT_ENSP00000382250,GOAT_ENSBTAP00000018491,GOAT_ENSBTAP00000025484,goat_GLEAN_10005005,GOAT_ENSBTAP00000010843,GOAT_ENSBTAP00000037064,GOAT_ENSBTAP00000020452,GOAT_EN…
GO:0005488	binding	molecular_function	9.7042e-08	2.1736e-05	1458	GOAT_ENSBTAP00000040188,GOAT_ENSP00000394817,GOAT_ENSP00000306382,GOAT_ENSP00000322716,GOAT_ENSP00000353590,GOAT_ENSP00000372689,GOAT_ENSBTAP00000053353,GOAT_ENSBTAP00000043670,GOAT_ENSP00000300896,GOAT_ENSBTAP00000012005,GOAT_ENSBTAP00000011533,GOAT_ENSP00000357838,GOAT_ENSBTAP00000002986,GOAT_ENSP00000221130,GOAT_ENSP00000377275,GOAT_ENSP00000372924,Novel01303,GOAT_ENSP00000356182,GOAT_ENSP0000…	492	GOAT_ENSP00000287641,GOAT_ENSBTAP00000019451,GOAT_ENSBTAP00000046530,GOAT_ENSBTAP00000019979,goat_GLEAN_10000532,GOAT_ENSP00000247470,GOAT_ENSBTAP00000024335,Novel03202,GOAT_ENSP00000415985,GOAT_ENSBTAP00000018505,GOAT_ENSP00000291823,GOAT_ENSP00000363041,GOAT_ENSP00000266022,GOAT_ENSP00000220853,GOAT_ENSBTAP00000005683,GOAT_ENSBTAP00000018478,GOAT_ENSP00000417651,GOAT_ENSBTAP00000005590,GOAT_ENS…
GO:0015078	hydrogen ion transmembrane transporter activity	molecular_function	7.6184e-06	0.0012661	6	GOAT_ENSBTAP00000031479,GOAT_ENSP00000264649,GOAT_ENSBTAP00000024812,goat_GLEAN_10012713,GOAT_ENSP00000390148,GOAT_ENSBTAP00000013468	27	GOAT_ENSBTAP00000014801,GOAT_ENSP00000417656,GOAT_ENSBTAP00000001993,GOAT_ENSP00000300688,GOAT_ENSP00000417378,goat_GLEAN_10015090,GOAT_ENSBTAP00000016993,GOAT_ENSBTAP00000018778,GOAT_ENSBTAP00000022949,GOAT_ENSBTAP00000050729,GOAT_ENSP00000253452,GOAT_ENSBTAP00000011458-D2,GOAT_ENSBTAP00000003832,GOAT_ENSP00000376037,GOAT_ENSP00000348205,GOAT_ENSP00000309565,Novel02352,GOAT_ENSBTAP00000024326,GO…
GO:0019843	rRNA binding	molecular_function	1.2807e-05	0.0020197	1	GOAT_ENSP00000349541	18	GOAT_ENSP00000346022,GOAT_ENSBTAP00000037041,GOAT_ENSP00000378396,GOAT_ENSP00000356001,goat_GLEAN_10006161,GOAT_ENSP00000363676,GOAT_ENSP00000341082,goat_GLEAN_10008378,GOAT_ENSP00000362744,GOAT_ENSP00000262584,GOAT_ENSP00000380318-D2,goat_GLEAN_10016337,GOAT_ENSP00000416110,GOAT_ENSBTAP00000052226,goat_GLEAN_10009625,GOAT_ENSP00000371103,GOAT_ENSP00000382250,GOAT_ENSBTAP00000018491
GO:0003954	NADH dehydrogenase activity	molecular_function	6.9515e-05	0.0092617	0		12	GOAT_ENSBTAP00000024209,GOAT_ENSBTAP00000016957,GOAT_ENSBTAP00000024600,GOAT_ENSBTAP00000021123,GOAT_ENSBTAP00000019529,goat_GLEAN_10005558,GOAT_ENSP00000215565,GOAT_ENSP00000330787,GOAT_ENSBTAP00000044670,GOAT_ENSP00000389732,GOAT_ENSBTAP00000000100,GOAT_ENSBTAP00000016013
GO:0016769	transferase activity, transferring nitrogenous groups	molecular_function	0.00023824	0.025569	9	GOAT_ENSP00000388939,GOAT_ENSP00000388809,GOAT_ENSBTAP00000002867,GOAT_ENSP00000345282,GOAT_ENSP00000296486,goat_GLEAN_10016392,GOAT_ENSBTAP00000005280,GOAT_ENSP00000357838,GOAT_ENSBTAP00000009440	2	GOAT_ENSBTAP00000040484,GOAT_ENSP00000378408
GO:0008137	NADH dehydrogenase (ubiquinone) activity	molecular_function	0.00024288	0.025711	0		11	GOAT_ENSP00000389732,GOAT_ENSBTAP00000044670,GOAT_ENSBTAP00000000100,GOAT_ENSBTAP00000016013,GOAT_ENSBTAP00000016957,GOAT_ENSBTAP00000024209,GOAT_ENSBTAP00000024600,GOAT_ENSBTAP00000021123,GOAT_ENSBTAP00000019529,goat_GLEAN_10005558,GOAT_ENSP00000215565
GO:0050136	NADH dehydrogenase (quinone) activity	molecular_function	0.00024288	0.025711	0		11	GOAT_ENSBTAP00000000100,GOAT_ENSP00000389732,GOAT_ENSBTAP00000044670,GOAT_ENSBTAP00000016013,GOAT_ENSBTAP00000019529,GOAT_ENSBTAP00000024209,GOAT_ENSBTAP00000016957,GOAT_ENSBTAP00000024600,GOAT_ENSBTAP00000021123,GOAT_ENSP00000215565,goat_GLEAN_10005558
GO:0060589	nucleoside-triphosphatase regulator activity	molecular_function	0.00030569	0.031081	85	goat_GLEAN_10018315,GOAT_ENSP00000379709,GOAT_ENSBTAP00000026598,GOAT_ENSBTAP00000016559,GOAT_ENSP00000262215,GOAT_ENSP00000328083,GOAT_ENSP00000303192,GOAT_ENSP00000314067,GOAT_ENSBTAP00000009418,GOAT_ENSP00000268182,GOAT_ENSP00000351015,GOAT_ENSBTAP00000016407,GOAT_ENSP00000276297,GOAT_ENSBTAP00000022495,GOAT_ENSP00000381571,GOAT_ENSBTAP00000053718,GOAT_ENSBTAP00000008751,GOAT_ENSP00000385631,G…	6	GOAT_ENSBTAP00000019980,GOAT_ENSBTAP00000008319,GOAT_ENSP00000357285,GOAT_ENSP00000264065,GOAT_ENSP00000372420,GOAT_ENSBTAP00000017362
GO:0004129	cytochrome-c oxidase activity	molecular_function	0.00032081	0.031783	1	goat_GLEAN_10012713	11	GOAT_ENSP00000258424,GOAT_ENSBTAP00000022949,GOAT_ENSBTAP00000050729,goat_GLEAN_10020081,GOAT_ENSP00000253452,GOAT_ENSBTAP00000014801,GOAT_ENSP00000359098,GOAT_ENSP00000417656,GOAT_ENSP00000376037,GOAT_ENSBTAP00000016993,GOAT_ENSBTAP00000018778
GO:0016675	oxidoreductase activity, acting on a heme group of donors	molecular_function	0.00032081	0.031783	1	goat_GLEAN_10012713	11	GOAT_ENSP00000359098,GOAT_ENSBTAP00000014801,GOAT_ENSP00000417656,GOAT_ENSP00000376037,GOAT_ENSBTAP00000018778,GOAT_ENSBTAP00000016993,GOAT_ENSP00000258424,GOAT_ENSBTAP00000050729,GOAT_ENSBTAP00000022949,goat_GLEAN_10020081,GOAT_ENSP00000253452
GO:0016676	oxidoreductase activity, acting on a heme group of donors, oxygen as acceptor	molecular_function	0.00032081	0.031783	1	goat_GLEAN_10012713	11	GOAT_ENSBTAP00000018778,GOAT_ENSBTAP00000016993,GOAT_ENSP00000376037,GOAT_ENSP00000417656,GOAT_ENSBTAP00000014801,GOAT_ENSP00000359098,GOAT_ENSP00000253452,goat_GLEAN_10020081,GOAT_ENSBTAP00000050729,GOAT_ENSBTAP00000022949,GOAT_ENSP00000258424
GO:0045296	cadherin binding	molecular_function	0.00031943	0.031783	9	GOAT_ENSP00000344456,GOAT_ENSP00000318486,goat_GLEAN_10009031,GOAT_ENSBTAP00000053345,GOAT_ENSBTAP00000000950,GOAT_ENSP00000261908,GOAT_ENSP00000382004,GOAT_ENSBTAP00000052600,GOAT_ENSBTAP00000040765	0
GO:0030695	GTPase regulator activity	molecular_function	0.00036207	0.035193	85	GOAT_ENSBTAP00000027619,GOAT_ENSP00000372924,GOAT_ENSBTAP00000006628,GOAT_ENSBTAP00000035199,GOAT_ENSP00000262477,GOAT_ENSP00000302647,GOAT_ENSP00000378338,GOAT_ENSP00000408464,GOAT_ENSP00000263245,GOAT_ENSP00000376306,GOAT_ENSP00000356224,GOAT_ENSP00000361009,GOAT_ENSP00000264431,GOAT_ENSP00000347134,GOAT_ENSBTAP00000051949,GOAT_ENSBTAP00000007299,GOAT_ENSP00000264245,goat_GLEAN_10014874,GOAT_EN…	4	GOAT_ENSBTAP00000017362,GOAT_ENSP00000372420,GOAT_ENSP00000357285,GOAT_ENSBTAP00000019980
GO:0003824	catalytic activity	molecular_function	0.00056233	0.042384	917	GOAT_ENSP00000367890,GOAT_ENSP00000369862,GOAT_ENSBTAP00000012167,GOAT_ENSBTAP00000013805,goat_GLEAN_10018395,GOAT_ENSBTAP00000023908,GOAT_ENSBTAP00000028046,GOAT_ENSBTAP00000007678,goat_GLEAN_10017589,GOAT_ENSP00000216044,GOAT_ENSP00000262891,GOAT_ENSBTAP00000002998,GOAT_ENSP00000261249,GOAT_ENSBTAP00000013892,GOAT_ENSBTAP00000021955,GOAT_ENSP00000367203,GOAT_ENSP00000363868,GOAT_ENSBTAP00000019…	306	GOAT_ENSP00000369147,goat_GLEAN_10020081,GOAT_ENSP00000301072,GOAT_ENSBTAP00000019969,GOAT_ENSBTAP00000023106,GOAT_ENSP00000382908,Novel00904,GOAT_ENSBTAP00000000100,GOAT_ENSP00000398026,GOAT_ENSBTAP00000017445,GOAT_ENSP00000406218,GOAT_ENSP00000261405,Novel02221,GOAT_ENSP00000270176,GOAT_ENSBTAP00000021025,GOAT_ENSBTAP00000026366,GOAT_ENSBTAP00000020758,GOAT_ENSP00000252603,Novel02257,GOAT_ENSBT…
GO:0044267	cellular protein metabolic process	biological_process	3.4062e-15	3.0967e-12	584	GOAT_ENSBTAP00000027782,GOAT_ENSP00000394338,GOAT_ENSBTAP00000009208,GOAT_ENSP00000369666,GOAT_ENSP00000314067,GOAT_ENSP00000210313,GOAT_ENSP00000384692,GOAT_ENSBTAP00000007798,GOAT_ENSP00000310933,GOAT_ENSP00000242719,GOAT_ENSP00000359368,GOAT_ENSP00000410298,GOAT_ENSP00000381097,GOAT_ENSP00000262820,GOAT_ENSP00000384625,GOAT_ENSBTAP00000004890,GOAT_ENSBTAP00000012432,GOAT_ENSP00000384449,GOAT_E…	272	GOAT_ENSBTAP00000028520,GOAT_ENSBTAP00000008809,GOAT_ENSBTAP00000022652,GOAT_ENSBTAP00000025484,GOAT_ENSBTAP00000002326,GOAT_ENSBTAP00000013845,goat_GLEAN_10008378,GOAT_ENSP00000363676,Novel02928,GOAT_ENSP00000406463,GOAT_ENSP00000415615,GOAT_ENSBTAP00000022382,Novel01164,GOAT_ENSP00000271843,GOAT_ENSBTAP00000051539,GOAT_ENSP00000300965,GOAT_ENSBTAP00000013769,GOAT_ENSBTAP00000027614,GOAT_ENSBTAP…
GO:0006412	translation	biological_process	1.5085e-12	8.3265e-10	30	GOAT_ENSBTAP00000006593,GOAT_ENSBTAP00000038377,GOAT_ENSP00000262820,goat_GLEAN_10015943,GOAT_ENSBTAP00000048631,GOAT_ENSP00000313829,GOAT_ENSP00000383274,GOAT_ENSBTAP00000006139,GOAT_ENSP00000386135,GOAT_ENSP00000401371,GOAT_ENSBTAP00000000210,GOAT_ENSBTAP00000035133,GOAT_ENSP00000305230,GOAT_ENSBTAP00000013988,GOAT_ENSBTAP00000019169,goat_GLEAN_10013077,GOAT_ENSP00000288670,goat_GLEAN_10019953,…	120	GOAT_ENSP00000225430,GOAT_ENSBTAP00000015716,GOAT_ENSP00000262584,GOAT_ENSP00000368927,GOAT_ENSP00000416110,GOAT_ENSBTAP00000026036,GOAT_ENSBTAP00000005015,GOAT_ENSBTAP00000052105,goat_GLEAN_10001563,GOAT_ENSBTAP00000007036,GOAT_ENSP00000380465,GOAT_ENSBTAP00000000814,GOAT_ENSP00000379888,GOAT_ENSBTAP00000031798,goat_GLEAN_10008378,GOAT_ENSBTAP00000001465,GOAT_ENSBTAP00000018888,goat_GLEAN_100098…
GO:0051641	cellular localization	biological_process	1.014e-11	4.7157e-09	300	GOAT_ENSBTAP00000005327,GOAT_ENSBTAP00000017150,GOAT_ENSBTAP00000028239,GOAT_ENSBTAP00000053718,GOAT_ENSBTAP00000029010,GOAT_ENSP00000381817,goat_GLEAN_10002674,goat_GLEAN_10001750,GOAT_ENSP00000360689,GOAT_ENSBTAP00000053357,GOAT_ENSBTAP00000009208,GOAT_ENSP00000351015,GOAT_ENSBTAP00000013805,GOAT_ENSP00000262370,GOAT_ENSBTAP00000009693,GOAT_ENSBTAP00000040372,GOAT_ENSP00000292205,GOAT_ENSP00000…	67	GOAT_ENSP00000352471,GOAT_ENSP00000361087,GOAT_ENSP00000326531,GOAT_ENSP00000348886,GOAT_ENSBTAP00000017856,Novel02481,GOAT_ENSBTAP00000016610,GOAT_ENSP00000392330,GOAT_ENSBTAP00000028983,GOAT_ENSBTAP00000014131,GOAT_ENSP00000424870,GOAT_ENSP00000380318-D2,goat_GLEAN_10009821,GOAT_ENSBTAP00000024333,GOAT_ENSP00000334100,GOAT_ENSBTAP00000026632,GOAT_ENSBTAP00000003190,GOAT_ENSBTAP00000022460,GOAT_…
GO:0070727	cellular macromolecule localization	biological_process	2.1262e-11	8.8812e-09	184	GOAT_ENSP00000414714,GOAT_ENSP00000381817,GOAT_ENSBTAP00000011803,GOAT_ENSBTAP00000043745,GOAT_ENSBTAP00000022183,GOAT_ENSBTAP00000017150,GOAT_ENSBTAP00000001675,GOAT_ENSBTAP00000005327,GOAT_ENSBTAP00000013018,GOAT_ENSBTAP00000024709,GOAT_ENSP00000411752,GOAT_ENSP00000327116,GOAT_ENSBTAP00000019752,GOAT_ENSP00000371734,GOAT_ENSP00000355173,GOAT_ENSBTAP00000008296,GOAT_ENSBTAP00000026221,GOAT_ENSB…	37	GOAT_ENSP00000257017,GOAT_ENSBTAP00000010389,goat_GLEAN_10006161,GOAT_ENSP00000309415,GOAT_ENSP00000342136,GOAT_ENSP00000341538,GOAT_ENSBTAP00000037810,GOAT_ENSBTAP00000019980,Novel02481,GOAT_ENSP00000424870,GOAT_ENSBTAP00000010212,GOAT_ENSP00000392330,GOAT_ENSBTAP00000028983,GOAT_ENSBTAP00000024333,GOAT_ENSBTAP00000003354,GOAT_ENSBTAP00000026632,GOAT_ENSP00000384411,GOAT_ENSP00000260746,GOAT_ENS…
GO:0034613	cellular protein localization	biological_process	1.0066e-10	3.7041e-08	181	GOAT_ENSP00000378323,GOAT_ENSBTAP00000022307,goat_GLEAN_10001965,GOAT_ENSP00000367345-D21,GOAT_ENSP00000359642,GOAT_ENSP00000363050,GOAT_ENSBTAP00000038304,GOAT_ENSBTAP00000009615,GOAT_ENSP00000009530,GOAT_ENSP00000361014,GOAT_ENSP00000341138,GOAT_ENSP00000262225,GOAT_ENSP00000327821,GOAT_ENSP00000290158,GOAT_ENSBTAP00000017106,GOAT_ENSP00000409666,GOAT_ENSBTAP00000026682,GOAT_ENSP00000347408,GOA…	36	GOAT_ENSP00000260746,GOAT_ENSBTAP00000022460,GOAT_ENSP00000363676,GOAT_ENSBTAP00000003190,Novel02352,GOAT_ENSP00000226105,GOAT_ENSBTAP00000026632,GOAT_ENSP00000384411,GOAT_ENSBTAP00000013668,GOAT_ENSBTAP00000015322,GOAT_ENSBTAP00000001518,GOAT_ENSBTAP00000011377,GOAT_ENSP00000357285,GOAT_ENSBTAP00000004751,GOAT_ENSBTAP00000034279,GOAT_ENSBTAP00000051902,GOAT_ENSBTAP00000041860,GOAT_ENSP0000040066…
GO:0051179	localization	biological_process	1.3245e-10	4.7605e-08	571	GOAT_ENSBTAP00000005055,GOAT_ENSP00000342858,GOAT_ENSP00000249647,GOAT_ENSBTAP00000026724,GOAT_ENSP00000357055,GOAT_ENSP00000425824,GOAT_ENSBTAP00000012722,GOAT_ENSP00000426632,GOAT_ENSBTAP00000024812,GOAT_ENSBTAP00000033917,GOAT_ENSBTAP00000001642,GOAT_ENSP00000345528,GOAT_ENSP00000359521,GOAT_ENSBTAP00000015986,GOAT_ENSBTAP00000001064-D3,goat_GLEAN_10004951,GOAT_ENSP00000378086,GOAT_ENSBTAP0000…	136	goat_GLEAN_10002348,GOAT_ENSBTAP00000001518,GOAT_ENSBTAP00000017654,Novel01441,GOAT_ENSP00000226105,Novel02352,GOAT_ENSP00000363676,GOAT_ENSBTAP00000010982,GOAT_ENSP00000333873,GOAT_ENSP00000377469,GOAT_ENSBTAP00000040566,GOAT_ENSBTAP00000006653,GOAT_ENSBTAP00000017362,GOAT_ENSP00000300688,GOAT_ENSBTAP00000011976,GOAT_ENSP00000415615,GOAT_ENSBTAP00000052447,GOAT_ENSBTAP00000034279,GOAT_ENSBTAP000…
GO:0051234	establishment of localization	biological_process	3.7492e-10	1.2876e-07	463	GOAT_ENSBTAP00000048820,GOAT_ENSP00000251241,GOAT_ENSBTAP00000016858,GOAT_ENSP00000355024,GOAT_ENSBTAP00000024524,GOAT_ENSBTAP00000003441,GOAT_ENSBTAP00000007448,GOAT_ENSP00000261514,GOAT_ENSBTAP00000031479,goat_GLEAN_10013265,goat_GLEAN_10019017,GOAT_ENSP00000393557,GOAT_ENSP00000412202,GOAT_ENSBTAP00000042823,GOAT_ENSP00000312435,GOAT_ENSBTAP00000017658,GOAT_ENSBTAP00000009878,GOAT_ENSP00000256…	118	GOAT_ENSBTAP00000013668,GOAT_ENSP00000362817,GOAT_ENSBTAP00000001071,GOAT_ENSBTAP00000011377,GOAT_ENSBTAP00000003190,GOAT_ENSBTAP00000026632,GOAT_ENSBTAP00000013208,GOAT_ENSP00000375575,GOAT_ENSP00000422122,GOAT_ENSP00000400664,GOAT_ENSBTAP00000014585,GOAT_ENSBTAP00000051902,GOAT_ENSP00000348886,GOAT_ENSP00000417378,GOAT_ENSP00000340278,GOAT_ENSP00000361087,GOAT_ENSBTAP00000012523,GOAT_ENSP000003…
GO:0022900	electron transport chain	biological_process	4.5013e-10	1.5123e-07	3	GOAT_ENSBTAP00000015944,GOAT_ENSP00000400101,GOAT_ENSP00000278840	34	GOAT_ENSP00000203407,GOAT_ENSBTAP00000014801,GOAT_ENSBTAP00000001993,GOAT_ENSBTAP00000016013,GOAT_ENSP00000268668,GOAT_ENSBTAP00000021249,GOAT_ENSP00000317159,GOAT_ENSBTAP00000025322,GOAT_ENSBTAP00000011458-D2,GOAT_ENSBTAP00000020018,GOAT_ENSP00000369176,GOAT_ENSBTAP00000013630,GOAT_ENSBTAP00000007189,GOAT_ENSBTAP00000027191,GOAT_ENSP00000215565,GOAT_ENSP00000389732,GOAT_ENSP00000309565,GOAT_ENSB…
GO:0019538	protein metabolic process	biological_process	5.2755e-10	1.7348e-07	442	GOAT_ENSBTAP00000035611,GOAT_ENSBTAP00000016033,GOAT_ENSP00000303887,GOAT_ENSP00000309968,GOAT_ENSP00000420527,GOAT_ENSP00000409666,GOAT_ENSP00000376855,GOAT_ENSP00000269195,GOAT_ENSBTAP00000037932,GOAT_ENSBTAP00000047104,GOAT_ENSP00000378086,GOAT_ENSBTAP00000023197,GOAT_ENSBTAP00000001064-D3,GOAT_ENSBTAP00000015986,GOAT_ENSBTAP00000001642,GOAT_ENSBTAP00000007833,GOAT_ENSP00000263574,GOAT_ENSP000…	241	GOAT_ENSP00000363676,GOAT_ENSBTAP00000012481,GOAT_ENSBTAP00000019184,GOAT_ENSP00000306548,GOAT_ENSP00000379733,GOAT_ENSP00000315017,GOAT_ENSBTAP00000017816,GOAT_ENSBTAP00000040182,GOAT_ENSP00000349078,GOAT_ENSBTAP00000020514,GOAT_ENSP00000360473,GOAT_ENSBTAP00000015866,goat_GLEAN_10009625,GOAT_ENSBTAP00000016409,GOAT_ENSBTAP00000005688,GOAT_ENSBTAP00000013079,GOAT_ENSP00000310842,GOAT_ENSP0000036…
GO:0006810	transport	biological_process	7.016e-10	2.259e-07	452	GOAT_ENSBTAP00000018852,GOAT_ENSP00000369318,GOAT_ENSBTAP00000002230,GOAT_ENSBTAP00000001891,GOAT_ENSP00000262461,GOAT_ENSP00000305288,GOAT_ENSBTAP00000018777,GOAT_ENSBTAP00000044932,GOAT_ENSBTAP00000021951,goat_GLEAN_10010999,GOAT_ENSBTAP00000023803,GOAT_ENSP00000333568,GOAT_ENSP00000361125,GOAT_ENSBTAP00000022033,GOAT_ENSBTAP00000010530,GOAT_ENSBTAP00000038597,GOAT_ENSBTAP00000022183,GOAT_ENSBT…	117	GOAT_ENSBTAP00000012183,GOAT_ENSBTAP00000015810,GOAT_ENSP00000296755,GOAT_ENSP00000356001,GOAT_ENSBTAP00000011016,GOAT_ENSP00000341538,GOAT_ENSBTAP00000051455,GOAT_ENSBTAP00000041719,GOAT_ENSP00000257017,GOAT_ENSP00000309415,goat_GLEAN_10006161,GOAT_ENSBTAP00000001049,Novel01021,GOAT_ENSP00000389351,GOAT_ENSBTAP00000021980,GOAT_ENSBTAP00000017158,GOAT_ENSBTAP00000031119,GOAT_ENSP00000227251,GOAT_…
GO:0046907	intracellular transport	biological_process	1.8158e-09	5.6126e-07	180	goat_GLEAN_10002674,GOAT_ENSBTAP00000053357,GOAT_ENSBTAP00000009208,GOAT_ENSBTAP00000013862,GOAT_ENSP00000351015,GOAT_ENSP00000310375,GOAT_ENSP00000371734,GOAT_ENSP00000379709,GOAT_ENSP00000411752,GOAT_ENSP00000327116,GOAT_ENSBTAP00000024709,GOAT_ENSBTAP00000009974,GOAT_ENSBTAP00000000027,goat_GLEAN_10008815,GOAT_ENSP00000262370,GOAT_ENSBTAP00000008296,GOAT_ENSP00000271610,GOAT_ENSBTAP00000022183…	53	GOAT_ENSP00000309415,goat_GLEAN_10006161,GOAT_ENSBTAP00000010389,GOAT_ENSBTAP00000041719,GOAT_ENSP00000257017,GOAT_ENSP00000326531,GOAT_ENSBTAP00000037810,GOAT_ENSP00000356001,GOAT_ENSP00000348886,GOAT_ENSP00000341538,GOAT_ENSBTAP00000012183,GOAT_ENSP00000342136,GOAT_ENSP00000296755,GOAT_ENSBTAP00000015810,GOAT_ENSBTAP00000016610,GOAT_ENSP00000392330,GOAT_ENSBTAP00000028983,GOAT_ENSBTAP0000001021…
GO:0051649	establishment of localization in cell	biological_process	2.3021e-09	6.8421e-07	246	GOAT_ENSBTAP00000049290,GOAT_ENSBTAP00000035479,GOAT_ENSBTAP00000048631,GOAT_ENSP00000313829,GOAT_ENSP00000415252,GOAT_ENSBTAP00000018136,GOAT_ENSBTAP00000053438,GOAT_ENSP00000324628,GOAT_ENSBTAP00000009081,GOAT_ENSP00000328023,GOAT_ENSP00000263245,GOAT_ENSBTAP00000006628,GOAT_ENSBTAP00000001978,GOAT_ENSP00000340010,GOAT_ENSBTAP00000011445,GOAT_ENSBTAP00000001839,GOAT_ENSP00000409204,GOAT_ENSBTAP…	60	GOAT_ENSBTAP00000020600,GOAT_ENSP00000389351,GOAT_ENSBTAP00000044075,GOAT_ENSBTAP00000010212,GOAT_ENSP00000227251,GOAT_ENSBTAP00000021980,GOAT_ENSP00000341538,GOAT_ENSP00000356001,GOAT_ENSBTAP00000037810,GOAT_ENSBTAP00000015810,GOAT_ENSP00000296755,GOAT_ENSP00000342136,GOAT_ENSBTAP00000012183,GOAT_ENSBTAP00000010389,goat_GLEAN_10006161,GOAT_ENSP00000309415,GOAT_ENSP00000257017,GOAT_ENSBTAP0000004…
GO:0006886	intracellular protein transport	biological_process	2.6867e-09	7.8344e-07	125	goat_GLEAN_10005485,GOAT_ENSP00000368818,GOAT_ENSP00000305230,GOAT_ENSBTAP00000044932,GOAT_ENSBTAP00000018777,GOAT_ENSP00000292205,GOAT_ENSP00000380869,GOAT_ENSP00000264896,GOAT_ENSBTAP00000023803,GOAT_ENSP00000328325,GOAT_ENSP00000358814,GOAT_ENSP00000380132,GOAT_ENSBTAP00000017670,GOAT_ENSBTAP00000022033,GOAT_ENSBTAP00000010530,GOAT_ENSP00000386992,GOAT_ENSP00000297151,GOAT_ENSBTAP00000022183,G…	32	GOAT_ENSP00000342136,GOAT_ENSBTAP00000037810,GOAT_ENSP00000341538,GOAT_ENSP00000257017,GOAT_ENSP00000309415,goat_GLEAN_10006161,GOAT_ENSBTAP00000010389,GOAT_ENSBTAP00000024333,Novel02481,GOAT_ENSP00000392330,GOAT_ENSBTAP00000028983,GOAT_ENSP00000424870,GOAT_ENSBTAP00000010212,GOAT_ENSBTAP00000011377,GOAT_ENSBTAP00000001518,GOAT_ENSBTAP00000015322,GOAT_ENSBTAP00000013668,GOAT_ENSP00000384411,GOAT_…
GO:0044237	cellular metabolic process	biological_process	3.2296e-09	9.2433e-07	863	GOAT_ENSBTAP00000001248,GOAT_ENSBTAP00000011803,goat_GLEAN_10011790,GOAT_ENSP00000362586,GOAT_ENSP00000366871,GOAT_ENSP00000264646,goat_GLEAN_10008815,GOAT_ENSBTAP00000026221,GOAT_ENSBTAP00000000210,GOAT_ENSBTAP00000040327,GOAT_ENSP00000354526,GOAT_ENSBTAP00000011617,GOAT_ENSBTAP00000001495,GOAT_ENSP00000305230,GOAT_ENSBTAP00000010107,GOAT_ENSP00000369134,GOAT_ENSBTAP00000053652,GOAT_ENSBTAP00000…	421	GOAT_ENSBTAP00000041770,GOAT_ENSP00000422440,GOAT_ENSP00000371110,goat_GLEAN_10014413,GOAT_ENSP00000376895,GOAT_ENSBTAP00000000519,GOAT_ENSBTAP00000008200,GOAT_ENSP00000203407,GOAT_ENSP00000231572,GOAT_ENSBTAP00000037041,GOAT_ENSP00000370569,GOAT_ENSP00000221742,GOAT_ENSP00000300026,GOAT_ENSP00000381607,GOAT_ENSP00000304327-D2,goat_GLEAN_10005558,Novel02279,GOAT_ENSBTAP00000019529,GOAT_ENSP000004…
GO:0033036	macromolecule localization	biological_process	4.7959e-09	1.3476e-06	271	GOAT_ENSP00000382717,goat_GLEAN_10016229,GOAT_ENSBTAP00000051767-D2,GOAT_ENSP00000368317,GOAT_ENSP00000334373,GOAT_ENSBTAP00000007481,GOAT_ENSBTAP00000041402,GOAT_ENSP00000233607,GOAT_ENSBTAP00000017076,GOAT_ENSBTAP00000001098,goat_GLEAN_10020318,GOAT_ENSBTAP00000040765,goat_GLEAN_10020512,GOAT_ENSP00000007414,GOAT_ENSP00000274496,GOAT_ENSP00000393912,GOAT_ENSP00000407602,GOAT_ENSBTAP00000009607,…	61	GOAT_ENSBTAP00000051902,GOAT_ENSBTAP00000004751,GOAT_ENSP00000339861,GOAT_ENSP00000400664,GOAT_ENSP00000422122,GOAT_ENSP00000375575,GOAT_ENSBTAP00000026632,GOAT_ENSBTAP00000003190,GOAT_ENSBTAP00000022460,GOAT_ENSBTAP00000001071,GOAT_ENSP00000357285,GOAT_ENSBTAP00000011377,GOAT_ENSBTAP00000013668,GOAT_ENSP00000372420,Novel02481,GOAT_ENSP00000424870,GOAT_ENSP00000392330,GOAT_ENSBTAP00000028983,GOAT…
GO:0008104	protein localization	biological_process	5.1924e-09	1.433e-06	240	GOAT_ENSBTAP00000009615,GOAT_ENSP00000341138,GOAT_ENSP00000359642,GOAT_ENSP00000253814,GOAT_ENSP00000367345-D21,goat_GLEAN_10001965,GOAT_ENSP00000378323,GOAT_ENSBTAP00000004831,GOAT_ENSP00000420527,GOAT_ENSP00000350325,GOAT_ENSP00000347408,GOAT_ENSP00000409666,GOAT_ENSBTAP00000026682,GOAT_ENSP00000387266,GOAT_ENSP00000290158,GOAT_ENSP00000327821,GOAT_ENSBTAP00000023197,GOAT_ENSBTAP00000047104,GOA…	50	GOAT_ENSP00000363676,Novel02352,GOAT_ENSP00000226105,GOAT_ENSP00000260746,GOAT_ENSP00000391509,GOAT_ENSP00000384411,GOAT_ENSBTAP00000001518,GOAT_ENSBTAP00000015322,GOAT_ENSBTAP00000034279,GOAT_ENSP00000291823,GOAT_ENSBTAP00000041860,GOAT_ENSP00000426858,GOAT_ENSBTAP00000011976,GOAT_ENSP00000247470,GOAT_ENSBTAP00000017362,goat_GLEAN_10000532,GOAT_ENSBTAP00000040566,GOAT_ENSP00000377469,GOAT_ENSP00…
GO:0006796	phosphate-containing compound metabolic process	biological_process	4.7781e-08	1.191e-05	392	GOAT_ENSP00000339769,GOAT_ENSBTAP00000011949,GOAT_ENSP00000322716,GOAT_ENSP00000309871,GOAT_ENSBTAP00000053353,GOAT_ENSBTAP00000013003,GOAT_ENSP00000372924,GOAT_ENSP00000312999,GOAT_ENSBTAP00000030425,GOAT_ENSBTAP00000011783,GOAT_ENSBTAP00000008153,GOAT_ENSP00000262477,GOAT_ENSP00000359683,GOAT_ENSP00000227758,GOAT_ENSBTAP00000015599,GOAT_ENSP00000354558,GOAT_ENSP00000342589,GOAT_ENSBTAP000000009…	90	GOAT_ENSP00000415615,GOAT_ENSP00000300688,GOAT_ENSP00000247470,GOAT_ENSBTAP00000017362,GOAT_ENSP00000175756,GOAT_ENSBTAP00000006653,GOAT_ENSBTAP00000018505,GOAT_ENSBTAP00000052447,GOAT_ENSP00000291823,goat_GLEAN_10002368,GOAT_ENSP00000359070,GOAT_ENSP00000367615,goat_GLEAN_10005709,GOAT_ENSBTAP00000001993,GOAT_ENSP00000264065,GOAT_ENSBTAP00000008319,GOAT_ENSP00000378485,GOAT_ENSBTAP00000015322,GO…
GO:0006793	phosphorus metabolic process	biological_process	5.5803e-08	1.3476e-05	394	GOAT_ENSP00000310491,goat_GLEAN_10001066,GOAT_ENSBTAP00000025510,GOAT_ENSBTAP00000001977,GOAT_ENSP00000359484,GOAT_ENSP00000373600,GOAT_ENSP00000367384,GOAT_ENSP00000356832,GOAT_ENSBTAP00000044296,GOAT_ENSBTAP00000012108,GOAT_ENSBTAP00000050806,GOAT_ENSP00000262891,GOAT_ENSBTAP00000008015,GOAT_ENSBTAP00000026423,GOAT_ENSP00000358817,GOAT_ENSBTAP00000018013,GOAT_ENSBTAP00000002872,GOAT_ENSP0000037…	91	GOAT_ENSBTAP00000019969,GOAT_ENSBTAP00000016610,GOAT_ENSP00000301587,GOAT_ENSBTAP00000015883,GOAT_ENSBTAP00000017710,goat_GLEAN_10015090,GOAT_ENSBTAP00000008196,GOAT_ENSBTAP00000003832,GOAT_ENSBTAP00000020579,GOAT_ENSP00000304229,GOAT_ENSP00000309565,GOAT_ENSP00000402597,GOAT_ENSBTAP00000034172,GOAT_ENSP00000352471,GOAT_ENSP00000348886,GOAT_ENSBTAP00000000568,GOAT_ENSP00000252603,GOAT_ENSBTAP0000…
GO:0016192	vesicle-mediated transport	biological_process	5.5482e-08	1.3476e-05	146	GOAT_ENSP00000409153,GOAT_ENSBTAP00000006628,GOAT_ENSP00000340010,GOAT_ENSP00000262820,GOAT_ENSP00000274473,GOAT_ENSP00000262061,GOAT_ENSP00000411761,GOAT_ENSP00000391056,GOAT_ENSP00000263245,GOAT_ENSP00000324628,goat_GLEAN_10017589,GOAT_ENSP00000244458,GOAT_ENSP00000352385,goat_GLEAN_10014874,GOAT_ENSP00000272102,GOAT_ENSP00000365444,GOAT_ENSP00000344456,GOAT_ENSP00000366988,GOAT_ENSP00000396519…	25	GOAT_ENSBTAP00000024333,GOAT_ENSBTAP00000020600,GOAT_ENSP00000334100,Novel01828,GOAT_ENSP00000346032,Novel02481,GOAT_ENSP00000219150,GOAT_ENSBTAP00000014131,GOAT_ENSBTAP00000010212,GOAT_ENSBTAP00000015810,GOAT_ENSBTAP00000037810,GOAT_ENSP00000352471,GOAT_ENSBTAP00000023660,GOAT_ENSBTAP00000027388,GOAT_ENSP00000309415,GOAT_ENSBTAP00000001049,GOAT_ENSP00000247470,GOAT_ENSP00000400664,GOAT_ENSBTAP00…
GO:0015031	protein transport	biological_process	6.063e-08	1.4197e-05	167	GOAT_ENSP00000380869,GOAT_ENSP00000264896,GOAT_ENSP00000380794,GOAT_ENSBTAP00000018777,GOAT_ENSBTAP00000044932,GOAT_ENSBTAP00000026951,GOAT_ENSP00000292205,GOAT_ENSP00000299138,goat_GLEAN_10005485,GOAT_ENSP00000368818,GOAT_ENSP00000305230,GOAT_ENSBTAP00000009693,GOAT_ENSBTAP00000022033,GOAT_ENSP00000386992,GOAT_ENSP00000297151,GOAT_ENSBTAP00000010530,GOAT_ENSP00000328325,GOAT_ENSP00000380132,GOAT…	44	GOAT_ENSBTAP00000008352,GOAT_ENSP00000342136,GOAT_ENSP00000341538,GOAT_ENSBTAP00000037810,GOAT_ENSP00000257017,GOAT_ENSP00000352471,GOAT_ENSBTAP00000010389,GOAT_ENSP00000309415,goat_GLEAN_10006161,GOAT_ENSBTAP00000024333,Novel02481,GOAT_ENSBTAP00000031119,GOAT_ENSP00000424870,GOAT_ENSBTAP00000010212,GOAT_ENSBTAP00000014131,GOAT_ENSBTAP00000028983,GOAT_ENSP00000392330,GOAT_ENSBTAP00000015322,GOAT_…
GO:0044248	cellular catabolic process	biological_process	6.1777e-08	1.425e-05	228	goat_GLEAN_10004120,GOAT_ENSBTAP00000009418,GOAT_ENSP00000276461,GOAT_ENSBTAP00000022307,GOAT_ENSP00000261263,GOAT_ENSP00000273980,GOAT_ENSP00000268171,GOAT_ENSP00000025008,GOAT_ENSP00000262225,GOAT_ENSBTAP00000016858,GOAT_ENSBTAP00000002878,GOAT_ENSP00000304006,GOAT_ENSP00000415576,GOAT_ENSP00000333926,GOAT_ENSBTAP00000023671,GOAT_ENSBTAP00000022801,GOAT_ENSBTAP00000017658,GOAT_ENSP00000378914,G…	83	GOAT_ENSBTAP00000022460,GOAT_ENSBTAP00000003190,GOAT_ENSP00000393785,GOAT_ENSBTAP00000026211,GOAT_ENSP00000217455,GOAT_ENSBTAP00000002843,GOAT_ENSP00000336799,GOAT_ENSBTAP00000016918,GOAT_ENSBTAP00000004751,GOAT_ENSP00000219548,Novel01164,GOAT_ENSBTAP00000051902,goat_GLEAN_10017591,GOAT_ENSBTAP00000011403,GOAT_ENSBTAP00000000630,GOAT_ENSP00000378408,GOAT_ENSBTAP00000013845,GOAT_ENSP00000304229,GO…
GO:0045184	establishment of protein localization	biological_process	6.841e-08	1.5548e-05	174	GOAT_ENSBTAP00000026724,GOAT_ENSBTAP00000005055,goat_GLEAN_10006731,GOAT_ENSP00000256646,GOAT_ENSP00000414224,GOAT_ENSP00000312435,GOAT_ENSBTAP00000002279,GOAT_ENSP00000426632,GOAT_ENSP00000382545,GOAT_ENSP00000412202,goat_GLEAN_10013265,GOAT_ENSP00000378914,GOAT_ENSBTAP00000027480,GOAT_ENSBTAP00000007391,GOAT_ENSP00000238081,GOAT_ENSBTAP00000023671,GOAT_ENSP00000299314,GOAT_ENSP00000309591,GOAT_…	45	GOAT_ENSBTAP00000015322,GOAT_ENSBTAP00000001518,GOAT_ENSBTAP00000011377,GOAT_ENSBTAP00000001071,GOAT_ENSBTAP00000013668,GOAT_ENSBTAP00000026632,GOAT_ENSP00000384411,GOAT_ENSP00000260746,GOAT_ENSBTAP00000022460,GOAT_ENSP00000363676,GOAT_ENSBTAP00000003190,Novel02352,GOAT_ENSP00000377469,GOAT_ENSP00000400664,GOAT_ENSP00000333873,GOAT_ENSBTAP00000040566,goat_GLEAN_10000532,GOAT_ENSP00000422122,GOAT_…
GO:0044710	single-organism metabolic process	biological_process	1.1128e-07	2.4568e-05	359	GOAT_ENSBTAP00000009547,GOAT_ENSP00000279488,GOAT_ENSP00000263574,GOAT_ENSBTAP00000024812,GOAT_ENSP00000362751,GOAT_ENSP00000303147,GOAT_ENSP00000410833,GOAT_ENSBTAP00000005488,GOAT_ENSBTAP00000047104,GOAT_ENSP00000390148,GOAT_ENSP00000381571,GOAT_ENSP00000388939,GOAT_ENSP00000359956,GOAT_ENSP00000420527,GOAT_ENSBTAP00000012551,GOAT_ENSBTAP00000026598,GOAT_ENSP00000315013,GOAT_ENSP00000265052,GOA…	159	GOAT_ENSBTAP00000020018,GOAT_ENSBTAP00000001993,goat_GLEAN_10005709,goat_GLEAN_10008729,GOAT_ENSP00000349078,GOAT_ENSBTAP00000024209,GOAT_ENSBTAP00000026635,GOAT_ENSBTAP00000013630,GOAT_ENSBTAP00000006653,GOAT_ENSP00000369176,GOAT_ENSP00000215565,GOAT_ENSBTAP00000017362,GOAT_ENSP00000300688,GOAT_ENSP00000268668,GOAT_ENSP00000367086,GOAT_ENSBTAP00000016013,GOAT_ENSP00000362058,GOAT_ENSP00000359070…
GO:0009056	catabolic process	biological_process	1.4127e-07	3.0751e-05	248	GOAT_ENSP00000342970,GOAT_ENSP00000277865,GOAT_ENSBTAP00000008015,GOAT_ENSBTAP00000026769,GOAT_ENSBTAP00000001977,GOAT_ENSP00000310928,GOAT_ENSP00000367384,GOAT_ENSP00000359484,GOAT_ENSP00000385942,GOAT_ENSP00000310491,GOAT_ENSBTAP00000008985,GOAT_ENSBTAP00000027504,GOAT_ENSP00000262820,GOAT_ENSP00000351155,GOAT_ENSBTAP00000029514,GOAT_ENSBTAP00000015667,GOAT_ENSP00000403357,Novel03188,GOAT_ENSP0…	97	GOAT_ENSP00000363322,GOAT_ENSBTAP00000017710,Novel02481,GOAT_ENSP00000310572,GOAT_ENSBTAP00000028983,GOAT_ENSBTAP00000016610,GOAT_ENSP00000271308,GOAT_ENSBTAP00000007135,GOAT_ENSBTAP00000013889,GOAT_ENSBTAP00000004984,goat_GLEAN_10015090,GOAT_ENSP00000402597,GOAT_ENSP00000352471,GOAT_ENSBTAP00000004431,GOAT_ENSBTAP00000013845,GOAT_ENSP00000304229,GOAT_ENSP00000351314,GOAT_ENSP00000301522,GOAT_ENS…
GO:0006996	organelle organization	biological_process	1.1843e-06	0.0002232	309	GOAT_ENSBTAP00000044656,GOAT_ENSP00000407602,GOAT_ENSBTAP00000009607,GOAT_ENSP00000414712,GOAT_ENSBTAP00000011175,GOAT_ENSBTAP00000000831,GOAT_ENSBTAP00000041521,GOAT_ENSBTAP00000022510,GOAT_ENSP00000357110,GOAT_ENSP00000417273,goat_GLEAN_10020318,GOAT_ENSBTAP00000040765,goat_GLEAN_10020512,GOAT_ENSBTAP00000003498,GOAT_ENSBTAP00000002363,GOAT_ENSBTAP00000007691,GOAT_ENSBTAP00000013790,GOAT_ENSP00…	85	GOAT_ENSP00000339861,GOAT_ENSBTAP00000051902,GOAT_ENSBTAP00000024621,GOAT_ENSBTAP00000031959,GOAT_ENSP00000422122,goat_GLEAN_10011380,GOAT_ENSP00000259632,GOAT_ENSBTAP00000022576,GOAT_ENSBTAP00000022460,Novel00296,GOAT_ENSBTAP00000026632,GOAT_ENSP00000217455,GOAT_ENSBTAP00000011377,GOAT_ENSBTAP00000023744,GOAT_ENSP00000336799,GOAT_ENSBTAP00000016610,GOAT_ENSP00000221265,GOAT_ENSBTAP00000023078,GO…
GO:0010646	regulation of cell communication	biological_process	1.7989e-06	0.00032708	322	GOAT_ENSP00000380869,GOAT_ENSBTAP00000024101,GOAT_ENSBTAP00000033741,GOAT_ENSBTAP00000020807,GOAT_ENSP00000257177,GOAT_ENSP00000348472,GOAT_ENSBTAP00000004880,GOAT_ENSP00000263923,GOAT_ENSP00000270530,GOAT_ENSP00000284262,GOAT_ENSBTAP00000014152,GOAT_ENSP00000264400,GOAT_ENSP00000257430,GOAT_ENSBTAP00000010532,GOAT_ENSP00000384963,GOAT_ENSBTAP00000017670,GOAT_ENSP00000307272,GOAT_ENSBTAP000000076…	42	GOAT_ENSP00000340278,GOAT_ENSP00000361087,GOAT_ENSP00000301522,GOAT_ENSP00000352471,GOAT_ENSP00000410059,GOAT_ENSBTAP00000015883,GOAT_ENSBTAP00000014131,GOAT_ENSP00000392330,GOAT_ENSBTAP00000016610,GOAT_ENSBTAP00000012973,GOAT_ENSP00000357285,GOAT_ENSP00000365280,GOAT_ENSP00000305071,GOAT_ENSBTAP00000000081,GOAT_ENSBTAP00000022460,GOAT_ENSP00000400664,GOAT_ENSBTAP00000011762,GOAT_ENSBTAP000000047…
GO:0023051	regulation of signaling	biological_process	2.248e-06	0.00040398	319	GOAT_ENSP00000354558,GOAT_ENSBTAP00000015985,GOAT_ENSBTAP00000015797,GOAT_ENSBTAP00000012724,GOAT_ENSBTAP00000022100,GOAT_ENSP00000372924,GOAT_ENSP00000356182,GOAT_ENSBTAP00000035199,GOAT_ENSBTAP00000019501,GOAT_ENSBTAP00000003338,GOAT_ENSBTAP00000053353,GOAT_ENSBTAP00000013003,GOAT_ENSBTAP00000015411,GOAT_ENSP00000309871,GOAT_ENSBTAP00000007466,GOAT_ENSBTAP00000011949,GOAT_ENSBTAP00000044998,GOA…	42	GOAT_ENSBTAP00000022759,GOAT_ENSBTAP00000006653,GOAT_ENSP00000333873,GOAT_ENSBTAP00000017362,GOAT_ENSP00000247470,goat_GLEAN_10000532,GOAT_ENSBTAP00000003609-D2,GOAT_ENSBTAP00000046530,GOAT_ENSP00000415615,GOAT_ENSP00000359070,GOAT_ENSP00000215909,GOAT_ENSBTAP00000052447,GOAT_ENSP00000291823,GOAT_ENSBTAP00000025561,GOAT_ENSBTAP00000015322,GOAT_ENSBTAP00000014796,GOAT_ENSBTAP00000021860,GOAT_ENSP0…
GO:1901575	organic substance catabolic process	biological_process	3.7143e-06	0.00064499	233	GOAT_ENSP00000342970,GOAT_ENSP00000277865,GOAT_ENSBTAP00000026769,GOAT_ENSBTAP00000008015,GOAT_ENSP00000385942,GOAT_ENSP00000310491,GOAT_ENSBTAP00000008985,GOAT_ENSBTAP00000027504,GOAT_ENSBTAP00000001977,GOAT_ENSP00000310928,GOAT_ENSP00000367384,GOAT_ENSP00000359484,GOAT_ENSBTAP00000006413,goat_GLEAN_10002504,GOAT_ENSP00000264431,GOAT_ENSBTAP00000012605,GOAT_ENSP00000356224,GOAT_ENSP00000411761,G…	88	Novel02481,GOAT_ENSP00000310572,GOAT_ENSP00000363322,GOAT_ENSBTAP00000017710,GOAT_ENSBTAP00000028983,GOAT_ENSBTAP00000016610,GOAT_ENSP00000271308,GOAT_ENSBTAP00000013889,GOAT_ENSBTAP00000007135,goat_GLEAN_10015090,GOAT_ENSBTAP00000004984,GOAT_ENSBTAP00000004431,GOAT_ENSP00000402597,GOAT_ENSP00000352471,GOAT_ENSP00000304229,GOAT_ENSP00000351314,GOAT_ENSBTAP00000013845,GOAT_ENSBTAP00000008936,GOAT_…
GO:0072657	protein localization to membrane	biological_process	4.2933e-06	0.00073725	34	goat_GLEAN_10001965,GOAT_ENSBTAP00000019752,GOAT_ENSP00000327116,GOAT_ENSBTAP00000001839,GOAT_ENSBTAP00000026221,goat_GLEAN_10020512,GOAT_ENSBTAP00000053357,GOAT_ENSBTAP00000038304,GOAT_ENSBTAP00000009208,GOAT_ENSP00000341138,GOAT_ENSP00000379855,GOAT_ENSBTAP00000041521,GOAT_ENSP00000359642,goat_GLEAN_10020399,GOAT_ENSBTAP00000008015,GOAT_ENSP00000382717,GOAT_ENSP00000262225,GOAT_ENSBTAP000000175…	4	GOAT_ENSBTAP00000010212,GOAT_ENSP00000400664,GOAT_ENSBTAP00000015322,GOAT_ENSP00000333873
GO:0008152	metabolic process	biological_process	6.5716e-06	0.0011161	963	GOAT_ENSP00000378027,GOAT_ENSP00000365191,GOAT_ENSP00000228955-D2,GOAT_ENSBTAP00000027632,GOAT_ENSP00000415252,GOAT_ENSP00000300134,GOAT_ENSBTAP00000006593,GOAT_ENSP00000350009,GOAT_ENSP00000342564,GOAT_ENSP00000316032,GOAT_ENSP00000336729,GOAT_ENSBTAP00000023134,GOAT_ENSP00000357597,GOAT_ENSBTAP00000002933,GOAT_ENSBTAP00000012432,GOAT_ENSBTAP00000031689,GOAT_ENSP00000379855,GOAT_ENSBTAP000000305…	468	GOAT_ENSBTAP00000014888,GOAT_ENSP00000329697,GOAT_ENSBTAP00000015875-D2,goat_GLEAN_10000507,GOAT_ENSBTAP00000025851,GOAT_ENSBTAP00000022078,GOAT_ENSP00000258081,GOAT_ENSBTAP00000007327,GOAT_ENSBTAP00000028364,GOAT_ENSP00000227251,GOAT_ENSBTAP00000031119,GOAT_ENSBTAP00000050234,goat_GLEAN_10010124,GOAT_ENSBTAP00000010912,goat_GLEAN_10010645,GOAT_ENSP00000362744,GOAT_ENSBTAP00000015354,GOAT_ENSBTAP…
GO:0071840	cellular component organization or biogenesis	biological_process	1.045e-05	0.0016823	494	GOAT_ENSP00000309871,GOAT_ENSP00000309689,GOAT_ENSP00000264758,GOAT_ENSP00000313869,GOAT_ENSBTAP00000015985,GOAT_ENSBTAP00000012724,GOAT_ENSBTAP00000001360,GOAT_ENSP00000361891,GOAT_ENSBTAP00000020651,GOAT_ENSBTAP00000000994,GOAT_ENSP00000354558,GOAT_ENSBTAP00000002506,GOAT_ENSBTAP00000019501,GOAT_ENSBTAP00000053836,GOAT_ENSP00000402009,GOAT_ENSBTAP00000011769,GOAT_ENSP00000350686,GOAT_ENSP000003…	149	GOAT_ENSBTAP00000016013,GOAT_ENSBTAP00000011976,GOAT_ENSP00000408910,GOAT_ENSBTAP00000001069,GOAT_ENSP00000333873,GOAT_ENSBTAP00000022759,GOAT_ENSBTAP00000017362,GOAT_ENSBTAP00000052447,GOAT_ENSBTAP00000034279,GOAT_ENSP00000362058,GOAT_ENSP00000359070,GOAT_ENSBTAP00000017654,goat_GLEAN_10005709,goat_GLEAN_10002348,GOAT_ENSP00000379733,Novel02352,GOAT_ENSP00000394419,GOAT_ENSBTAP00000021978,GOAT_E…
GO:0035556	intracellular signal transduction	biological_process	1.3925e-05	0.0021738	304	GOAT_ENSP00000372924,GOAT_ENSP00000312999,GOAT_ENSBTAP00000008153,GOAT_ENSBTAP00000035199,GOAT_ENSBTAP00000003338,GOAT_ENSBTAP00000020651,GOAT_ENSP00000354558,GOAT_ENSBTAP00000012724,GOAT_ENSBTAP00000007466,GOAT_ENSBTAP00000011949,GOAT_ENSBTAP00000044998,GOAT_ENSBTAP00000002162,GOAT_ENSBTAP00000053353,GOAT_ENSBTAP00000013003,GOAT_ENSBTAP00000015411,GOAT_ENSP00000309871,GOAT_ENSP00000268864,GOAT_E…	43	GOAT_ENSBTAP00000017362,GOAT_ENSP00000247470,goat_GLEAN_10000532,GOAT_ENSBTAP00000006653,GOAT_ENSP00000333873,GOAT_ENSBTAP00000003609-D2,GOAT_ENSBTAP00000046530,GOAT_ENSP00000359070,GOAT_ENSBTAP00000025561,GOAT_ENSP00000215909,GOAT_ENSBTAP00000052447,GOAT_ENSP00000291823,GOAT_ENSP00000264065,goat_GLEAN_10002201,GOAT_ENSBTAP00000051539,GOAT_ENSP00000260746,GOAT_ENSBTAP00000021860,GOAT_ENSBTAP00000…
GO:0016043	cellular component organization	biological_process	1.5509e-05	0.0023969	493	GOAT_ENSP00000373555,GOAT_ENSBTAP00000024297,GOAT_ENSP00000362166,GOAT_ENSP00000263635,GOAT_ENSBTAP00000053357,GOAT_ENSP00000314067,GOAT_ENSBTAP00000009208,GOAT_ENSP00000276297,GOAT_ENSP00000351015,GOAT_ENSP00000371638,GOAT_ENSBTAP00000004836,GOAT_ENSP00000262215,GOAT_ENSBTAP00000013805,GOAT_ENSBTAP00000019468,GOAT_ENSP00000327536,GOAT_ENSP00000358400,GOAT_ENSP00000263923,GOAT_ENSBTAP00000035133,…	129	GOAT_ENSP00000352471,GOAT_ENSP00000341346,GOAT_ENSP00000351314,GOAT_ENSP00000361087,GOAT_ENSP00000340278,GOAT_ENSP00000348886,GOAT_ENSP00000361725,GOAT_ENSBTAP00000000568,GOAT_ENSP00000363322,GOAT_ENSBTAP00000016610,GOAT_ENSBTAP00000014131,GOAT_ENSBTAP00000000448,GOAT_ENSBTAP00000023078,GOAT_ENSBTAP00000000814,GOAT_ENSP00000411851,Novel02124,GOAT_ENSBTAP00000026632,GOAT_ENSBTAP00000022576,GOAT_EN…
GO:0071702	organic substance transport	biological_process	1.5669e-05	0.0023977	236	GOAT_ENSBTAP00000005055,GOAT_ENSP00000357055,GOAT_ENSBTAP00000026724,GOAT_ENSP00000426632,GOAT_ENSBTAP00000002279,goat_GLEAN_10001311,GOAT_ENSBTAP00000039151,GOAT_ENSP00000414224,GOAT_ENSBTAP00000027480,GOAT_ENSP00000382545,GOAT_ENSBTAP00000007391,GOAT_ENSP00000345528,GOAT_ENSP00000402760,GOAT_ENSP00000309591,GOAT_ENSP00000386183,GOAT_ENSBTAP00000015986,GOAT_ENSBTAP00000001064-D3,GOAT_ENSBTAP0000…	58	GOAT_ENSBTAP00000015322,GOAT_ENSBTAP00000001518,GOAT_ENSP00000384411,GOAT_ENSP00000260746,Novel02352,GOAT_ENSP00000363676,GOAT_ENSP00000377469,GOAT_ENSBTAP00000040566,goat_GLEAN_10000532,GOAT_ENSBTAP00000017362,GOAT_ENSP00000247470,GOAT_ENSBTAP00000011976,GOAT_ENSP00000426858,GOAT_ENSBTAP00000041860,GOAT_ENSP00000291823,GOAT_ENSBTAP00000052447,GOAT_ENSBTAP00000034279,GOAT_ENSBTAP00000003201,GOAT_…
GO:0016311	dephosphorylation	biological_process	2.8073e-05	0.0041719	69	GOAT_ENSP00000194900,GOAT_ENSP00000352995,GOAT_ENSP00000360155,GOAT_ENSBTAP00000029213,GOAT_ENSBTAP00000053345,GOAT_ENSBTAP00000002274,GOAT_ENSBTAP00000037080,GOAT_ENSP00000256190,GOAT_ENSP00000378914,GOAT_ENSP00000370593,GOAT_ENSP00000382545,GOAT_ENSP00000279488,GOAT_ENSBTAP00000012722,GOAT_ENSP00000418287,GOAT_ENSP00000371221,goat_GLEAN_10003677,GOAT_ENSP00000324527,GOAT_ENSBTAP00000013805,GOAT…	6	GOAT_ENSBTAP00000039412,GOAT_ENSBTAP00000041719,GOAT_ENSBTAP00000031959,GOAT_ENSP00000254654,GOAT_ENSBTAP00000020579,GOAT_ENSP00000175756
GO:0006464	cellular protein modification process	biological_process	3.326e-05	0.0048494	355	GOAT_ENSP00000383977,GOAT_ENSP00000287936,GOAT_ENSP00000325677,GOAT_ENSBTAP00000018777,GOAT_ENSBTAP00000002010,GOAT_ENSBTAP00000053446,goat_GLEAN_10000756,GOAT_ENSP00000346791,GOAT_ENSP00000362659,GOAT_ENSBTAP00000023803,GOAT_ENSBTAP00000009441,GOAT_ENSBTAP00000024313,GOAT_ENSP00000333568,GOAT_ENSP00000361125,GOAT_ENSP00000367203,GOAT_ENSP00000416175,GOAT_ENSBTAP00000013701,GOAT_ENSBTAP0000001053…	75	GOAT_ENSBTAP00000012183,GOAT_ENSBTAP00000008200,GOAT_ENSBTAP00000010843,GOAT_ENSBTAP00000015810,GOAT_ENSBTAP00000040484,GOAT_ENSBTAP00000041719,GOAT_ENSP00000300965,GOAT_ENSP00000254654,GOAT_ENSBTAP00000018091,GOAT_ENSBTAP00000021980,GOAT_ENSBTAP00000044670,GOAT_ENSP00000300026,GOAT_ENSP00000304327-D2,GOAT_ENSP00000381607,GOAT_ENSP00000271843,GOAT_ENSP00000345629,GOAT_ENSBTAP00000000926,Novel0193…
GO:0036211	protein modification process	biological_process	3.326e-05	0.0048494	355	GOAT_ENSP00000395910,GOAT_ENSP00000378027,GOAT_ENSP00000376306,GOAT_ENSBTAP00000041594,GOAT_ENSBTAP00000022108,GOAT_ENSBTAP00000009081,GOAT_ENSP00000242719,GOAT_ENSBTAP00000015758,GOAT_ENSP00000393596,GOAT_ENSP00000415252,GOAT_ENSBTAP00000027632,GOAT_ENSBTAP00000046803,GOAT_ENSP00000228955-D2,GOAT_ENSP00000404718,GOAT_ENSBTAP00000017563,GOAT_ENSP00000351086,GOAT_ENSP00000350009,GOAT_ENSBTAP000000…	75	GOAT_ENSP00000300965,GOAT_ENSP00000254654,GOAT_ENSBTAP00000018091,GOAT_ENSBTAP00000021980,GOAT_ENSBTAP00000044670,GOAT_ENSP00000381607,GOAT_ENSP00000304327-D2,GOAT_ENSP00000300026,GOAT_ENSP00000345629,GOAT_ENSP00000271843,GOAT_ENSBTAP00000000926,Novel01939,GOAT_ENSBTAP00000044075,GOAT_ENSP00000311447,GOAT_ENSBTAP00000010212,GOAT_ENSBTAP00000008200,GOAT_ENSBTAP00000012183,GOAT_ENSBTAP00000010843,G…
GO:0009966	regulation of signal transduction	biological_process	5.8303e-05	0.0081178	284	GOAT_ENSBTAP00000016559,GOAT_ENSP00000262215,GOAT_ENSP00000344666,GOAT_ENSP00000262370,goat_GLEAN_10002674,GOAT_ENSBTAP00000053357,GOAT_ENSP00000360689,GOAT_ENSP00000314067,GOAT_ENSBTAP00000028238,GOAT_ENSP00000276297,GOAT_ENSBTAP00000016407,GOAT_ENSP00000351015,GOAT_ENSBTAP00000053718,GOAT_ENSP00000386135,GOAT_ENSBTAP00000001140,GOAT_ENSBTAP00000009444,GOAT_ENSBTAP00000010351,GOAT_ENSBTAP0000002…	39	GOAT_ENSP00000352471,GOAT_ENSP00000340278,GOAT_ENSP00000301522,GOAT_ENSBTAP00000016610,GOAT_ENSP00000392330,GOAT_ENSBTAP00000014131,GOAT_ENSBTAP00000015883,GOAT_ENSP00000410059,GOAT_ENSBTAP00000000081,GOAT_ENSBTAP00000022460,GOAT_ENSP00000365280,GOAT_ENSP00000305071,GOAT_ENSP00000357285,GOAT_ENSBTAP00000004751,GOAT_ENSBTAP00000011762,GOAT_ENSP00000400664,GOAT_ENSBTAP00000010389,GOAT_ENSP000003719…
GO:0046700	heterocycle catabolic process	biological_process	9.7757e-05	0.010869	186	GOAT_ENSP00000262477,GOAT_ENSP00000393414,GOAT_ENSBTAP00000030425,GOAT_ENSP00000325836,GOAT_ENSP00000381571,GOAT_ENSP00000380869,GOAT_ENSP00000359484,GOAT_ENSP00000262225,GOAT_ENSBTAP00000027619,GOAT_ENSBTAP00000026869,GOAT_ENSBTAP00000024996,GOAT_ENSP00000327309,GOAT_ENSBTAP00000053652,GOAT_ENSP00000270530,GOAT_ENSP00000310491,GOAT_ENSBTAP00000012331,GOAT_ENSBTAP00000013862,GOAT_ENSP00000235329,…	43	GOAT_ENSP00000260746,GOAT_ENSP00000368219,GOAT_ENSP00000221486,GOAT_ENSBTAP00000019451,GOAT_ENSP00000336799,GOAT_ENSP00000422440,GOAT_ENSBTAP00000020484,GOAT_ENSBTAP00000018505,GOAT_ENSP00000354040,GOAT_ENSBTAP00000024326,GOAT_ENSBTAP00000007327,GOAT_ENSBTAP00000018435,GOAT_ENSBTAP00000013889,GOAT_ENSP00000301072,GOAT_ENSBTAP00000031119,GOAT_ENSBTAP00000006502,GOAT_ENSP00000222145,GOAT_ENSP000004…
GO:0044270	cellular nitrogen compound catabolic process	biological_process	0.00010571	0.011505	185	GOAT_ENSBTAP00000027619,GOAT_ENSBTAP00000026869,GOAT_ENSP00000327309,GOAT_ENSBTAP00000024996,GOAT_ENSBTAP00000053652,GOAT_ENSP00000270530,GOAT_ENSP00000235329,GOAT_ENSP00000310491,GOAT_ENSBTAP00000013862,GOAT_ENSBTAP00000012331,GOAT_ENSBTAP00000032319,GOAT_ENSBTAP00000016159,GOAT_ENSP00000262477,GOAT_ENSP00000393414,GOAT_ENSP00000325836,GOAT_ENSP00000381571,GOAT_ENSBTAP00000030425,GOAT_ENSP000003…	43	GOAT_ENSBTAP00000019451,GOAT_ENSP00000221486,GOAT_ENSP00000336799,GOAT_ENSP00000422440,GOAT_ENSP00000260746,GOAT_ENSP00000368219,GOAT_ENSP00000354040,GOAT_ENSBTAP00000024326,GOAT_ENSBTAP00000007327,GOAT_ENSBTAP00000018505,GOAT_ENSBTAP00000020484,GOAT_ENSP00000301072,GOAT_ENSBTAP00000031119,GOAT_ENSBTAP00000006502,GOAT_ENSP00000222145,GOAT_ENSBTAP00000018435,GOAT_ENSBTAP00000013889,GOAT_ENSBTAP000…
GO:0006612	protein targeting to membrane	biological_process	9.2927e-05	0.011772	17	GOAT_ENSBTAP00000033188,GOAT_ENSP00000318486,GOAT_ENSBTAP00000027628,GOAT_ENSBTAP00000053357,GOAT_ENSBTAP00000009208,GOAT_ENSBTAP00000001839,GOAT_ENSP00000327116,goat_GLEAN_10001965,GOAT_ENSP00000388756,GOAT_ENSP00000305230,GOAT_ENSP00000382545,GOAT_ENSBTAP00000053572,GOAT_ENSP00000335632,GOAT_ENSP00000262225,GOAT_ENSBTAP00000053438,GOAT_ENSP00000328023,GOAT_ENSBTAP00000008015	3	GOAT_ENSP00000424870,GOAT_ENSBTAP00000010212,GOAT_ENSBTAP00000017362
GO:0031329	regulation of cellular catabolic process	biological_process	0.00011006	0.013829	107	GOAT_ENSP00000262539,GOAT_ENSBTAP00000013003,GOAT_ENSBTAP00000053353,GOAT_ENSP00000309871,GOAT_ENSP00000415252,GOAT_ENSBTAP00000048631,GOAT_ENSP00000264245,GOAT_ENSP00000349298,goat_GLEAN_10014874,GOAT_ENSP00000354558,GOAT_ENSP00000411761,GOAT_ENSP00000263245,GOAT_ENSP00000356224,GOAT_ENSBTAP00000006413,GOAT_ENSP00000252444,GOAT_ENSP00000216044,GOAT_ENSBTAP00000053438,GOAT_ENSBTAP00000051949,GOAT…	10	GOAT_ENSBTAP00000006653,GOAT_ENSBTAP00000017362,GOAT_ENSP00000247470,GOAT_ENSBTAP00000028520,GOAT_ENSP00000359070,GOAT_ENSP00000219548,GOAT_ENSP00000264065,GOAT_ENSBTAP00000013845,GOAT_ENSBTAP00000022460,GOAT_ENSP00000352471
GO:0031529	ruffle organization	biological_process	0.00011821	0.014622	10	GOAT_ENSBTAP00000053438,GOAT_ENSBTAP00000012724,GOAT_ENSBTAP00000025510,GOAT_ENSP00000386800,goat_GLEAN_10017969,GOAT_ENSBTAP00000008015,GOAT_ENSP00000354558,GOAT_ENSP00000371734,GOAT_ENSP00000331983,GOAT_ENSP00000379406	1	GOAT_ENSBTAP00000027388
GO:1901361	organic cyclic compound catabolic process	biological_process	0.00015386	0.014887	191	GOAT_ENSP00000328023,GOAT_ENSBTAP00000008225,GOAT_ENSBTAP00000028307,GOAT_ENSP00000381097,GOAT_ENSP00000376444,GOAT_ENSBTAP00000001248,GOAT_ENSP00000363868,GOAT_ENSBTAP00000011803,GOAT_ENSP00000406512,GOAT_ENSP00000379709,GOAT_ENSBTAP00000022495,GOAT_ENSP00000385631,GOAT_ENSP00000367309,GOAT_ENSP00000394338,GOAT_ENSBTAP00000009418,GOAT_ENSBTAP00000023881,GOAT_ENSBTAP00000029514,GOAT_ENSP000003466…	45	GOAT_ENSP00000402597,GOAT_ENSBTAP00000025586,GOAT_ENSBTAP00000008809,GOAT_ENSBTAP00000013889,GOAT_ENSBTAP00000018435,GOAT_ENSP00000222145,GOAT_ENSBTAP00000031119,GOAT_ENSBTAP00000006502,GOAT_ENSP00000301072,GOAT_ENSBTAP00000020484,GOAT_ENSBTAP00000018505,GOAT_ENSBTAP00000022460,GOAT_ENSBTAP00000007327,GOAT_ENSBTAP00000024326,GOAT_ENSP00000354040,GOAT_ENSP00000260746,GOAT_ENSP00000368219,GOAT_ENSP…
GO:0009205	purine ribonucleoside triphosphate metabolic process	biological_process	0.00015257	0.018567	116	GOAT_ENSBTAP00000001098,goat_GLEAN_10013077,GOAT_ENSP00000268864,GOAT_ENSP00000313050,GOAT_ENSBTAP00000028880,GOAT_ENSBTAP00000023881,GOAT_ENSP00000351132,GOAT_ENSP00000302895,GOAT_ENSBTAP00000044656,GOAT_ENSP00000262958-D2,GOAT_ENSBTAP00000013737,goat_GLEAN_10012713,GOAT_ENSP00000300574,GOAT_ENSP00000302647,GOAT_ENSP00000378338,GOAT_ENSP00000262477,GOAT_ENSBTAP00000030425,GOAT_ENSBTAP00000027619…	34	GOAT_ENSP00000359070,goat_GLEAN_10002368,GOAT_ENSBTAP00000051902,goat_GLEAN_10017591,GOAT_ENSBTAP00000018505,GOAT_ENSBTAP00000017362,GOAT_ENSP00000247470,GOAT_ENSP00000300688,GOAT_ENSP00000369456,GOAT_ENSP00000393785,GOAT_ENSBTAP00000024326,GOAT_ENSP00000260746,GOAT_ENSP00000348205,GOAT_ENSP00000336799,goat_GLEAN_10005709,GOAT_ENSBTAP00000031119,GOAT_ENSP00000301587,GOAT_ENSBTAP00000017710,GOAT_E…
GO:0044257	cellular protein catabolic process	biological_process	0.00015829	0.019112	65	GOAT_ENSP00000373772,GOAT_ENSP00000290649,GOAT_ENSBTAP00000006593,GOAT_ENSP00000342970,GOAT_ENSP00000384109,GOAT_ENSBTAP00000026769,GOAT_ENSP00000350009,GOAT_ENSP00000377005,GOAT_ENSP00000260187,GOAT_ENSBTAP00000053291,GOAT_ENSP00000007414,GOAT_ENSBTAP00000025095,GOAT_ENSBTAP00000012432,GOAT_ENSBTAP00000040765,GOAT_ENSBTAP00000013671,GOAT_ENSBTAP00000008985,goat_GLEAN_10020399,GOAT_ENSBTAP0000000…	26	Novel01164,GOAT_ENSP00000310572,GOAT_ENSBTAP00000028364,GOAT_ENSP00000363322,GOAT_ENSP00000219548,GOAT_ENSP00000262193,GOAT_ENSBTAP00000044075,GOAT_ENSBTAP00000028983,GOAT_ENSBTAP00000016918,GOAT_ENSP00000271308,GOAT_ENSP00000359910,GOAT_ENSBTAP00000012773,GOAT_ENSBTAP00000028520,GOAT_ENSBTAP00000003636,GOAT_ENSP00000264552,GOAT_ENSBTAP00000004984,GOAT_ENSP00000259457,GOAT_ENSP00000414826,GOAT_EN…
GO:0046128	purine ribonucleoside metabolic process	biological_process	0.00016733	0.020048	122	GOAT_ENSP00000300107,goat_GLEAN_10014874,GOAT_ENSP00000264245,GOAT_ENSP00000356224,GOAT_ENSP00000263245,GOAT_ENSP00000264431,GOAT_ENSBTAP00000053438,GOAT_ENSBTAP00000051949,GOAT_ENSP00000328023,GOAT_ENSBTAP00000006628,GOAT_ENSBTAP00000001978,GOAT_ENSBTAP00000015667,GOAT_ENSP00000403357,GOAT_ENSP00000351155,GOAT_ENSBTAP00000029514,GOAT_ENSP00000391806,GOAT_ENSBTAP00000013671,GOAT_ENSBTAP0000001233…	34	goat_GLEAN_10015090,GOAT_ENSBTAP00000003832,GOAT_ENSBTAP00000016610,GOAT_ENSBTAP00000050234,GOAT_ENSBTAP00000017710,GOAT_ENSP00000301587,GOAT_ENSBTAP00000031119,GOAT_ENSP00000348886,GOAT_ENSBTAP00000000568,GOAT_ENSBTAP00000025586,GOAT_ENSBTAP00000029468,GOAT_ENSBTAP00000037810,goat_GLEAN_10005005,GOAT_ENSP00000376895,GOAT_ENSP00000301072,GOAT_ENSBTAP00000041770,GOAT_ENSP00000257017,GOAT_ENSBTAP00…
GO:0009144	purine nucleoside triphosphate metabolic process	biological_process	0.00017098	0.020327	116	GOAT_ENSBTAP00000013951-D2,GOAT_ENSP00000376444,GOAT_ENSBTAP00000053353,GOAT_ENSBTAP00000013003,GOAT_ENSP00000356790,GOAT_ENSP00000309871,GOAT_ENSBTAP00000030425,GOAT_ENSP00000372924,GOAT_ENSBTAP00000027619,GOAT_ENSP00000312999,GOAT_ENSP00000378338,GOAT_ENSP00000302647,GOAT_ENSP00000262477,GOAT_ENSP00000354558,GOAT_ENSP00000216044,GOAT_ENSP00000347134,GOAT_ENSP00000302895,GOAT_ENSBTAP00000044656,…	34	GOAT_ENSP00000300688,GOAT_ENSBTAP00000017362,GOAT_ENSP00000247470,GOAT_ENSBTAP00000018505,goat_GLEAN_10002368,GOAT_ENSP00000359070,goat_GLEAN_10017591,GOAT_ENSBTAP00000051902,goat_GLEAN_10005709,GOAT_ENSP00000348205,GOAT_ENSP00000336799,GOAT_ENSBTAP00000024326,GOAT_ENSP00000260746,GOAT_ENSP00000369456,GOAT_ENSP00000393785,goat_GLEAN_10015090,GOAT_ENSBTAP00000003832,GOAT_ENSBTAP00000050234,GOAT_EN…
GO:0009199	ribonucleoside triphosphate metabolic process	biological_process	0.00018382	0.021044	116	GOAT_ENSP00000381097,GOAT_ENSBTAP00000017150,GOAT_ENSP00000225235,GOAT_ENSBTAP00000013018,GOAT_ENSBTAP00000028239,GOAT_ENSBTAP00000053718,GOAT_ENSBTAP00000001248,GOAT_ENSP00000385631,GOAT_ENSBTAP00000011803,GOAT_ENSP00000351015,GOAT_ENSBTAP00000022495,GOAT_ENSP00000276297,GOAT_ENSBTAP00000013862,GOAT_ENSP00000327116,GOAT_ENSP00000379709,GOAT_ENSBTAP00000016559,GOAT_ENSP00000262215,GOAT_ENSBTAP000…	34	GOAT_ENSBTAP00000051455,GOAT_ENSP00000402597,GOAT_ENSBTAP00000041770,GOAT_ENSP00000257017,GOAT_ENSP00000376895,GOAT_ENSP00000301072,goat_GLEAN_10005005,GOAT_ENSBTAP00000029468,GOAT_ENSBTAP00000037810,GOAT_ENSBTAP00000000568,GOAT_ENSP00000348886,GOAT_ENSBTAP00000025586,GOAT_ENSBTAP00000017710,GOAT_ENSP00000301587,GOAT_ENSBTAP00000031119,GOAT_ENSBTAP00000050234,GOAT_ENSBTAP00000016610,GOAT_ENSBTAP0…
GO:0006091	generation of precursor metabolites and energy	biological_process	0.0002007	0.022807	22	GOAT_ENSP00000369134,GOAT_ENSP00000400101,GOAT_ENSBTAP00000048820,GOAT_ENSBTAP00000016858,GOAT_ENSP00000355024,GOAT_ENSP00000238994,GOAT_ENSP00000410833,GOAT_ENSBTAP00000010532,GOAT_ENSP00000303147,GOAT_ENSBTAP00000012551,GOAT_ENSP00000367345-D21,GOAT_ENSBTAP00000027348,GOAT_ENSP00000278840,GOAT_ENSBTAP00000015944,GOAT_ENSBTAP00000021325,GOAT_ENSP00000265417,GOAT_ENSP00000313050,GOAT_ENSBTAP00000…	43	GOAT_ENSBTAP00000027191,GOAT_ENSBTAP00000011377,GOAT_ENSBTAP00000020018,GOAT_ENSBTAP00000015810,GOAT_ENSBTAP00000040484,GOAT_ENSBTAP00000029468,GOAT_ENSP00000317159,GOAT_ENSBTAP00000025322,GOAT_ENSP00000203407,GOAT_ENSBTAP00000001993,GOAT_ENSBTAP00000021249,GOAT_ENSP00000379386,GOAT_ENSBTAP00000050275,GOAT_ENSBTAP00000008386,GOAT_ENSBTAP00000000100,goat_GLEAN_10008729,GOAT_ENSBTAP00000043418,GOAT…
GO:0042278	purine nucleoside metabolic process	biological_process	0.00020771	0.023059	122	GOAT_ENSBTAP00000017150,GOAT_ENSP00000225235,GOAT_ENSBTAP00000013018,GOAT_ENSP00000381097,GOAT_ENSP00000385631,GOAT_ENSBTAP00000001248,GOAT_ENSBTAP00000011803,GOAT_ENSBTAP00000028239,GOAT_ENSBTAP00000053718,GOAT_ENSP00000351015,GOAT_ENSP00000276297,GOAT_ENSBTAP00000022495,GOAT_ENSBTAP00000013862,GOAT_ENSBTAP00000008296,goat_GLEAN_10008815,GOAT_ENSBTAP00000000027,GOAT_ENSP00000327116,GOAT_ENSP0000…	34	GOAT_ENSP00000402597,GOAT_ENSBTAP00000051455,GOAT_ENSP00000257017,GOAT_ENSBTAP00000041770,GOAT_ENSP00000376895,GOAT_ENSP00000301072,goat_GLEAN_10005005,GOAT_ENSBTAP00000029468,GOAT_ENSBTAP00000037810,GOAT_ENSBTAP00000000568,GOAT_ENSP00000348886,GOAT_ENSBTAP00000025586,GOAT_ENSP00000301587,GOAT_ENSBTAP00000031119,GOAT_ENSBTAP00000017710,GOAT_ENSBTAP00000050234,GOAT_ENSBTAP00000016610,GOAT_ENSBTAP0…
GO:0043412	macromolecule modification	biological_process	0.00020606	0.023059	359	GOAT_ENSBTAP00000027632,GOAT_ENSP00000415252,GOAT_ENSBTAP00000046803,GOAT_ENSBTAP00000015758,GOAT_ENSP00000393596,GOAT_ENSP00000228955-D2,GOAT_ENSP00000376306,GOAT_ENSBTAP00000041594,GOAT_ENSBTAP00000009081,GOAT_ENSP00000242719,GOAT_ENSBTAP00000022108,GOAT_ENSP00000395910,GOAT_ENSP00000378027,GOAT_ENSBTAP00000012432,GOAT_ENSBTAP00000023134,GOAT_ENSBTAP00000024046,GOAT_ENSBTAP00000053291,GOAT_ENSB…	77	GOAT_ENSP00000254654,GOAT_ENSBTAP00000018091,GOAT_ENSP00000300965,Novel01939,GOAT_ENSBTAP00000044075,GOAT_ENSP00000311447,GOAT_ENSBTAP00000010212,GOAT_ENSP00000271843,GOAT_ENSP00000345629,GOAT_ENSBTAP00000000926,GOAT_ENSBTAP00000044670,GOAT_ENSP00000300026,GOAT_ENSP00000381607,GOAT_ENSP00000304327-D2,GOAT_ENSBTAP00000021980,GOAT_ENSBTAP00000040484,GOAT_ENSBTAP00000010843,GOAT_ENSBTAP00000015810,G…
GO:0051603	proteolysis involved in cellular protein catabolic process	biological_process	0.00021143	0.023174	62	GOAT_ENSP00000346791,GOAT_ENSBTAP00000024313,GOAT_ENSBTAP00000033909,GOAT_ENSBTAP00000002878,GOAT_ENSP00000309591,GOAT_ENSBTAP00000014152,GOAT_ENSBTAP00000002028,GOAT_ENSBTAP00000007833,GOAT_ENSP00000382545,GOAT_ENSBTAP00000022801,GOAT_ENSBTAP00000004373,GOAT_ENSBTAP00000039949,GOAT_ENSP00000418287,GOAT_ENSBTAP00000002010,GOAT_ENSBTAP00000044932,GOAT_ENSP00000387654,goat_GLEAN_10006757,goat_GLEAN…	26	GOAT_ENSBTAP00000026211,GOAT_ENSBTAP00000002843,GOAT_ENSP00000264065,GOAT_ENSP00000368699,GOAT_ENSBTAP00000013845,GOAT_ENSBTAP00000003190,GOAT_ENSP00000351314,GOAT_ENSBTAP00000017816,GOAT_ENSP00000414826,GOAT_ENSP00000259457,GOAT_ENSBTAP00000004984,GOAT_ENSP00000264552,GOAT_ENSBTAP00000003636,GOAT_ENSBTAP00000028520,GOAT_ENSBTAP00000012773,GOAT_ENSP00000359910,GOAT_ENSP00000271308,GOAT_ENSBTAP000…
GO:0000910	cytokinesis	biological_process	0.00028405	0.024389	38	GOAT_ENSBTAP00000026451,GOAT_ENSBTAP00000009208,GOAT_ENSBTAP00000025590,GOAT_ENSP00000347427,GOAT_ENSBTAP00000029514,GOAT_ENSP00000306124,GOAT_ENSP00000257430,GOAT_ENSP00000355231,GOAT_ENSP00000382545,GOAT_ENSBTAP00000044604,GOAT_ENSBTAP00000053818,GOAT_ENSBTAP00000027893,GOAT_ENSBTAP00000007691,GOAT_ENSP00000309871,GOAT_ENSP00000262820,GOAT_ENSP00000310226,GOAT_ENSBTAP00000005166,GOAT_ENSP000003…	6	GOAT_ENSBTAP00000017654,GOAT_ENSP00000271843,GOAT_ENSP00000259632,GOAT_ENSBTAP00000041719,Novel01058,GOAT_ENSP00000260746
GO:0044265	cellular macromolecule catabolic process	biological_process	0.00022983	0.025014	77	GOAT_ENSP00000377005,GOAT_ENSP00000260187,GOAT_ENSP00000350009,Novel01757,GOAT_ENSBTAP00000026769,GOAT_ENSP00000342970,GOAT_ENSP00000384109,GOAT_ENSP00000373772,GOAT_ENSP00000290649,GOAT_ENSBTAP00000006593,goat_GLEAN_10020399,GOAT_ENSBTAP00000001977,GOAT_ENSBTAP00000008985,GOAT_ENSBTAP00000040765,GOAT_ENSBTAP00000012432,GOAT_ENSBTAP00000013671,GOAT_ENSBTAP00000053291,GOAT_ENSP00000007414,GOAT_ENS…	31	GOAT_ENSP00000363322,GOAT_ENSP00000219548,GOAT_ENSBTAP00000028364,Novel01164,GOAT_ENSP00000310572,GOAT_ENSBTAP00000016918,GOAT_ENSP00000271308,GOAT_ENSBTAP00000028983,GOAT_ENSP00000262193,GOAT_ENSBTAP00000044075,GOAT_ENSBTAP00000028520,GOAT_ENSBTAP00000012773,GOAT_ENSP00000359910,GOAT_ENSP00000259457,GOAT_ENSBTAP00000019451,GOAT_ENSBTAP00000007327,GOAT_ENSBTAP00000004984,GOAT_ENSBTAP00000003354,G…
GO:0009141	nucleoside triphosphate metabolic process	biological_process	0.00026337	0.027318	116	GOAT_ENSBTAP00000024812,GOAT_ENSBTAP00000026869,GOAT_ENSP00000414224,GOAT_ENSBTAP00000002279,GOAT_ENSBTAP00000042481,GOAT_ENSP00000400101,GOAT_ENSBTAP00000005488,GOAT_ENSP00000386183,GOAT_ENSBTAP00000023671,GOAT_ENSP00000362751,GOAT_ENSP00000360155,GOAT_ENSP00000333926,GOAT_ENSP00000261263,GOAT_ENSP00000420527,GOAT_ENSP00000381571,GOAT_ENSP00000390148,GOAT_ENSP00000324172,GOAT_ENSP00000262225,GOA…	35	GOAT_ENSP00000348205,GOAT_ENSP00000336799,goat_GLEAN_10005709,GOAT_ENSP00000369456,GOAT_ENSP00000393785,GOAT_ENSBTAP00000024326,GOAT_ENSP00000260746,GOAT_ENSP00000247470,GOAT_ENSBTAP00000017362,GOAT_ENSBTAP00000031396,GOAT_ENSP00000300688,goat_GLEAN_10002368,GOAT_ENSP00000359070,goat_GLEAN_10017591,GOAT_ENSBTAP00000051902,GOAT_ENSBTAP00000018505,goat_GLEAN_10005005,GOAT_ENSBTAP00000029468,GOAT_EN…
GO:0044281	small molecule metabolic process	biological_process	0.00032852	0.032339	248	GOAT_ENSBTAP00000002872,GOAT_ENSBTAP00000008015,GOAT_ENSP00000321108,GOAT_ENSBTAP00000012108,GOAT_ENSP00000277865,GOAT_ENSP00000359484,GOAT_ENSP00000367384,GOAT_ENSBTAP00000044296,GOAT_ENSP00000310928,GOAT_ENSP00000310491,GOAT_ENSBTAP00000018069,Novel03188,GOAT_ENSP00000403357,GOAT_ENSBTAP00000015667,GOAT_ENSP00000351155,GOAT_ENSBTAP00000029514,GOAT_ENSP00000356224,GOAT_ENSP00000278840,GOAT_ENSP0…	87	GOAT_ENSBTAP00000017710,GOAT_ENSP00000301587,GOAT_ENSBTAP00000017856,Novel02481,GOAT_ENSBTAP00000016610,GOAT_ENSBTAP00000014131,GOAT_ENSBTAP00000003832,GOAT_ENSP00000007516,goat_GLEAN_10015090,GOAT_ENSP00000352471,GOAT_ENSP00000402597,GOAT_ENSBTAP00000004431,GOAT_ENSP00000386621,GOAT_ENSP00000304229,GOAT_ENSBTAP00000039412,GOAT_ENSBTAP00000008936,GOAT_ENSBTAP00000029468,GOAT_ENSP00000252603,GOAT_…
GO:0009119	ribonucleoside metabolic process	biological_process	0.00033609	0.032876	122	GOAT_ENSP00000313050,GOAT_ENSP00000268864,GOAT_ENSBTAP00000028880,GOAT_ENSBTAP00000001098,goat_GLEAN_10013077,GOAT_ENSBTAP00000023881,GOAT_ENSP00000382717,GOAT_ENSBTAP00000044656,GOAT_ENSP00000302895,GOAT_ENSP00000351132,GOAT_ENSP00000357880,goat_GLEAN_10012713,GOAT_ENSBTAP00000013737,GOAT_ENSP00000300574,GOAT_ENSP00000262958-D2,GOAT_ENSBTAP00000030425,GOAT_ENSP00000312999,GOAT_ENSBTAP00000027619…	34	goat_GLEAN_10002368,GOAT_ENSP00000359070,goat_GLEAN_10017591,GOAT_ENSBTAP00000051902,GOAT_ENSBTAP00000018505,GOAT_ENSBTAP00000017362,GOAT_ENSP00000247470,GOAT_ENSP00000300688,GOAT_ENSP00000393785,GOAT_ENSBTAP00000024326,GOAT_ENSP00000260746,GOAT_ENSP00000348205,GOAT_ENSP00000336799,goat_GLEAN_10005709,GOAT_ENSP00000367615,GOAT_ENSBTAP00000017710,GOAT_ENSP00000301587,GOAT_ENSBTAP00000031119,GOAT_E…
GO:0071704	organic substance metabolic process	biological_process	0.00052963	0.04134	1325	GOAT_ENSBTAP00000023201,GOAT_ENSP00000365444,GOAT_ENSBTAP00000010466,GOAT_ENSP00000368868,GOAT_ENSP00000386350,GOAT_ENSP00000334170,GOAT_ENSBTAP00000014109,GOAT_ENSP00000290649,GOAT_ENSBTAP00000011083,GOAT_ENSP00000354960,GOAT_ENSP00000268182,GOAT_ENSP00000238081,GOAT_ENSP00000268638,GOAT_ENSP00000376438,GOAT_ENSP00000282928,GOAT_ENSBTAP00000053526,Novel01757,GOAT_ENSP00000327801,GOAT_ENSP0000030…	507	goat_GLEAN_10015090,GOAT_ENSBTAP00000050222,GOAT_ENSBTAP00000004431,GOAT_ENSP00000410758,GOAT_ENSBTAP00000017816,GOAT_ENSBTAP00000011377,GOAT_ENSP00000394869,Novel01129,GOAT_ENSBTAP00000037810,GOAT_ENSP00000346022,goat_GLEAN_10002368,GOAT_ENSBTAP00000005523,GOAT_ENSBTAP00000042411,GOAT_ENSP00000259457,GOAT_ENSBTAP00000051455,Novel00750,GOAT_ENSBTAP00000009152,GOAT_ENSBTAP00000040182,GOAT_ENSBTAP0…
GO:0019439	aromatic compound catabolic process	biological_process	0.0005527	0.042287	181	GOAT_ENSP00000333926,GOAT_ENSP00000300574,GOAT_ENSBTAP00000013671,GOAT_ENSP00000262958-D2,GOAT_ENSP00000276297,GOAT_ENSBTAP00000013238,GOAT_ENSP00000372924,GOAT_ENSBTAP00000026451,goat_GLEAN_10002434,GOAT_ENSBTAP00000028239,GOAT_ENSBTAP00000049244,GOAT_ENSBTAP00000043748,GOAT_ENSP00000361027,GOAT_ENSP00000225688,GOAT_ENSBTAP00000001839,GOAT_ENSBTAP00000001066,GOAT_ENSP00000390148,GOAT_ENSP0000031…	43	GOAT_ENSP00000354040,GOAT_ENSBTAP00000024326,GOAT_ENSBTAP00000007327,GOAT_ENSBTAP00000020484,GOAT_ENSBTAP00000018505,GOAT_ENSP00000221486,GOAT_ENSBTAP00000019451,GOAT_ENSP00000336799,GOAT_ENSP00000422440,GOAT_ENSP00000260746,GOAT_ENSP00000368219,GOAT_ENSBTAP00000008809,GOAT_ENSBTAP00000025586,GOAT_ENSP00000402597,GOAT_ENSP00000301072,GOAT_ENSBTAP00000031119,GOAT_ENSBTAP00000006502,GOAT_ENSP000002…

## Sheet: KEGG
#Term	Database	Id	Sample number	Over_represented_pValue	Corrected P-Value	Gene name
Ribosome	KEGG PATHWAY	bta03010	73	0	0	RPS3A, MGC127088, RPS3AE|RPS25|MRPL13, MGC127837|RPL6|RPL6|RPS23, MGC126916|RPL18A, MGC127693|RPL34|RPL34|RPS20, MGC128832|RPL4|RPL4|RPL9|RPL19, MGC127270|RPL38, MGC133564|RPL24| |RPS27L, MGC127652|RPS19, MGC133566|RPS15A, MGC133517|RPS9|RPS7, MGC165697|RPS13|RPS13|RPL27A|RPL39, MGC127980, MGC179345|RPS4X, MGC127573, RPS4|RPS4X, MGC127573, RPS4|RPSA, LAMR1|RPL23A, MGC140350|RPL23A, MGC140350|RPL1…
Oxidative phosphorylation	KEGG PATHWAY	bta00190	76	7.86038e-14	9.78617e-12	UQCR10, MGC127828, UCRC|COX5B, MGC127763|NDUFA3, CI-B9|NDUFA8, MGC127844|NDUFA5, B13, MGC133631|NDUFA4|NDUFA6, B14|NDUFB3, CI-B12, MGC128543|ATP6V0E2, MGC137533|NDUFAB1, MGC127017, SDAP|NDUFA12, DAP13|ATP6V1G2, MGC136989|ATP6V1F, ATP6S14, MGC137008|NDUFS8, MGC134156|ATP5D|UQCRC2|SDHB, MGC127046|NDUFA13, GRIM19|NDUFB9, B22|NDUFA7|UQCR11, UQCR|COX6A1, VIA_L|ATP6V1D, VATD|NDUFB4, B15|ATP5G1|ATP5L, M…
Alzheimer's disease	KEGG PATHWAY	bta05010	82	6.1235e-10	5.08251e-08	UQCR10, MGC127828, UCRC|COX5B, MGC127763|NDUFA3, CI-B9|CYCS, MGC128356|CAPN1|NDUFA5, B13, MGC133631|NDUFA4|UQCRQ, QP-C|NDUFB3, CI-B12, MGC128543|CDK5R1, P25/P35|EIF2AK3|NDUFAB1, MGC127017, SDAP|APH1A, MGC128098|NDUFB11, ESSS, MGC127141, Np15|PSEN1|SDHB, MGC127046|NDUFA13, GRIM19|PLCB4|ADAM10, ADAM_10|MAPK1, ERK2|NDUFA7|UQCR11, UQCR|COX6A1, VIA_L| |NDUFA9|ATP2A2|NDUFB4, B15|NDUFB9, B22|ATP5G1|PPP3…
Parkinson's disease	KEGG PATHWAY	bta05012	67	2.14336e-09	1.33424e-07	UQCR10, MGC127828, UCRC|COX5B, MGC127763|NDUFA3, CI-B9|CYCS, MGC128356|NDUFA8, MGC127844|NDUFA5, B13, MGC133631|NDUFA4|NDUFA6, B14|NDUFB3, CI-B12, MGC128543|ATP5A1, MGC139059|NDUFAB1, MGC127017, SDAP|NDUFA12, DAP13|PARK7, DJ-1, DJ1|NDUFB11, ESSS, MGC127141, Np15|SLC18A2|SDHB, MGC127046|NDUFA13, GRIM19|NDUFB9, B22|NDUFA7|UQCR11, UQCR|COX6A1, VIA_L|NDUFA9|NDUFB4, B15|ATP5G1|UQCRQ, QP-C|UQCRB, MGC12…
Huntington's disease	KEGG PATHWAY	bta05016	83	1.28928e-08	6.4206e-07	UQCR10, MGC127828, UCRC|COX5B, MGC127763|NDUFA3, CI-B9|CYCS, MGC128356|NDUFA8, MGC127844|NDUFA5, B13, MGC133631|NDUFA4|NDUFA6, B14|NDUFB3, CI-B12, MGC128543|ATP5A1, MGC139059|NDUFAB1, MGC127017, SDAP|NDUFA12, DAP13|POLR2H, MGC140013|NDUFB11, ESSS, MGC127141, Np15|VDAC1|CLTB, CLTLB|SDHB, MGC127046|NDUFA13, GRIM19|PLCB4|NRF1|CLTA, CLTA2, MGC140767|NDUFA7|UQCR11, UQCR|COX6A1, VIA_L| |NDUFA9|NDUFB4, …
Citrate cycle (TCA cycle)	KEGG PATHWAY	bta00020	19	1.57696e-05	0.000560947	SDHD, CII-4, CII4, QPs3, cybS|IDH1|SUCLA2, MGC140636|DLST|MDH2, MGC134027|SUCLG2, MGC127366|SDHC|IDH3G, MGC139826|PDHX, MGC143185|PDHA1, PDHA|OGDHL|ACLY, MGC128987|IDH3A, BG1, KIAA0631, MGC139736|SUCLG1|CS, MGC137617|SDHB, MGC127046|OGDH, MGC137985|DLD|DLAT|
Endocytosis	KEGG PATHWAY	bta04144	76	2.66398e-05	0.00110555	CAV1|VPS25, MGC10540|RET|SMAP2, MGC143386, SMAP1L|STAM, MGC142699|ASAP3, DDEFL1, MGC155101|CXCR4, MGC128682|PIP5K1C|EPS15, MGC151691|PSD2|FGFR3|RNF41, MGC137581|ZFYVE16|RABEP1|DNM1, MGC142803|SH3KBP1|CLTB, CLTLB|TFRC|CHMP4A|ARFGAP1, ARFGAP3|CLTA, CLTA2, MGC140767|ARFGAP2, ZNF289|RAB11FIP5|ARFGAP3, MGC137888|LDLR|SH3GL2, MGC140546|EPN2| |ACAP1, CENTB1, MGC157219|VPS4B, MGC139102|AGAP3, CENTG3|CLTC…
ErbB signaling pathway	KEGG PATHWAY	bta04012	31	0.000162671	0.00578643	STAT5A, STAT5A/MGF, STATA5|CAMK2B, MGC128545|MAPK10|CRK|PLCG1|MAPK1, ERK2|PIK3R2, MGC138113|MTOR|PRKCB, PRKCB1|SRC|BAD, MGC127164|PIK3R1|AKT3|MAP2K4, MGC140244|ABL1|PTK2, FADK|SOS1|GAB1|CAMK2G|NCK1, MGC139414|CAMK2D, MGC128576|ERBB3, MGC143211|PRKCA, PKRCA|SHC1, p66shc|MAP2K7|AKT2|PIK3CB, PI3K, PI3Kbeta|PIK3R5|PAK2|MAP2K2, MGC134398, MGC140486|CAMK2A, MGC139375, MGC155201|
Long-term potentiation	KEGG PATHWAY	bta04720	22	0.000850395	0.0176457	CAMK2B, MGC128545|CAMK2A, MGC139375, MGC155201 |GRIA2, GluR-2, GluR-B, GluR-K2, MGC139795|PRKCB, PRKCB1|PPP3R1|GRIA1|RPS6KA6|ATF4, MGC126973, MGC179261|PPP1R1A, MGC128551|GRIN1|PPP3CA|RAP1B|CAMK2G|CAMK2D, MGC128576| CHP1| PPP3CB |PRKACA|PLCB4|ITPR1|PPP1CB, MGC129042| MAP2K2, MGC134398, MGC140486| MAPK1,ERK2
Phosphatidylinositol signaling system	KEGG PATHWAY	bta04070	28	0.000888025	0.0201017	PIK3C2A|INPP4A|PIP4K2A|PLCG1|INPP5D, MGC157261|IMPA1, MGC140630|PIK3R2, MGC138113|PRKCB, PRKCB1|PIP4K2B|PIK3R1|OCRL, MGC179390|ITPK1|ITPKB|CDS2, MGC142734|DGKH, MGC128923|PI4K2A|INPP5E, PMPCA|PIP5K1C|PIP4K2C, MGC140500|INPP5A|PIK3C2B|PRKCA, PKRCA|PIP5K1A, MGC159892|PIK3CB, PI3K, PI3Kbeta|PLCB4|PIK3R5|ITPR1|INPPL1|
Proteasome	KEGG PATHWAY	bta03050	18	0.00108583	0.022531	PSME1, MGC128361|PSMD4, MGC139713|PSMC3|PSMB6, MGC128291|PSMA6, MGC134228|PSMA7, MGC126929|PSMB4, MGC127020|PSMB7, MGC133789|PSMA5|PSMB1, MGC133525|PSMA3, MGC133967|PSMB5, MGC134464|PSMB10, MGC127213|PSMC1|PSMB3, MGC128032|PSMC5|PSME4|PSME2|
GABAergic synapse	KEGG PATHWAY	bta04727	23	0.0013954	0.0267273	PRKACA|GNAI1, MGC128528|GABRA1, MGC137550|GNAI2| SLC32A1|GABRG2|ADCY2|SLC38A2|SRC|GABBR2|ADCY7|GABARAPL1, MGC128701|NSF, MGC139541| GABBR1, MGC140191|GNB1, MGC129044|GLUL, MGC128403|PLCL1|PRKCB, PRKCB1|GAD1, MGC142602|GABRA3|GNAO1|SLC6A1|GABRA5, MGC139683|
Inositol phosphate metabolism	KEGG PATHWAY	bta00562	26	0.00160386	0.0307201	ITPKC, MGC139070|PIK3C2A|PIK3CB, PI3K, PI3Kbeta|ALDH6A1|PIP4K2A|INPP5B|PIKFYVE, PIP5K3, fab1-like|PLCG1|INPP5D, MGC157261|IMPA1, MGC140630|PIP4K2B|ISYNA1, MGC133800|OCRL, MGC179390|PLCB4|ITPK1|INPP5K, MGC140383, SKIP|PI4K2A|PIP5K1C|PIP4K2C, MGC140500|INPP5A|ITPKB|PIP5K1A, MGC159892|INPP4A|PIP5K1B|MTM1|INPPL1|
Bacterial invasion of epithelial cells	KEGG PATHWAY	bta05100	24	0.0018232	0.0324269	CAV1|VCL, MGC142547|PXN|CTNNB1, MGC139922|CLTB, CLTLB|CTTN, MGC137923|CLTA, CLTA2, MGC140767|PIK3R2, MGC138113|SRC|CLTC|PIK3R1|CTNNA1, MGC128363|CTNNA1, MGC128363|PTK2, FADK|ELMO1, MGC139838|GAB1|WASF1, WAVE1|FN1|CRK|SHC1, p66shc|ARPC3, MGC127675|PIK3CB, PI3K, PI3Kbeta|PIK3R5|CAV2|ARPC1B|
Adherens junction	KEGG PATHWAY	bta04520	27	0.00263438	0.0409975	PTPRF|VCL, MGC142547|MLLT4|CTNNB1, MGC139922|CSNK2B, CSKN2B, MGC134413|CTNND1|NLK|MAPK1, ERK2|RAC3, MGC166020|SRC|PTPRM|ACTN4|LEF1|SMAD2|CTNNA1, MGC128363|CTNNA1, MGC128363|TGFBR2|PVRL2, MGC140511, prr2|PVRL2, MGC140511, prr2|TJP1, zo1|WASF1, WAVE1|WASF3|RHOA, ARHA|SMAD4|ACTG1|FGFR1, MGC151817|PTPRB|SORBS1, MGC142406|SORBS1, MGC142406|ACTN3, MGC140041|
Fc gamma R-mediated phagocytosis	KEGG PATHWAY	bta04666	34	0.00356538	0.0522223	SYK, MGC127145|ASAP3, DDEFL1, MGC155101|ARPC1B|PPAP2B, MGC128313|DNM1, MGC142803|PLCG1|GSN, MGC127421|LIMK1|MAPK1, ERK2|PAK1, MGC139676|PIK3R2, MGC138113|INPP5D, MGC157261|VAV3|VAV3|AKT2|PIK3R1|AKT3|CFL2, MGC140740|MAP2K1|MYO10|PPAP2C, MGC138011|PIP5K1C|PRKCB, PRKCB1|WASF1, WAVE1|INPPL1|CRK|PRKCA, PKRCA|WASF3|AMPH, MGC140160|PIP5K1A, MGC159892|ARPC3, MGC127675|PIK3CB, PI3K, PI3Kbeta|PIP5K1B|LYN|P…
HIF-1 signaling pathway	KEGG PATHWAY	bta04066	38	0.00488224	0.0578894	IFNGR2|CAMK2B, MGC128545| |SLC2A1, MGC139716|STAT3, MGC128731|CDKN1B|PLCG1|TFRC|MAPK1, ERK2|PIK3R2, MGC138113|MTOR|AKT2|TCEB1, MGC137138|VEGFA, VEGF|TEK, MGC139569|PIK3R1|AKT3|NFKB1|EIF4E, MGC134278|PFKFB4|IL6R|MAP2K1|PRKCB, PRKCB1|CAMK2G|TIMP1|EGLN1|CAMK2D, MGC128576|PRKCA, PKRCA|TF, MGC139350|MKNK1, MGC133983|PIK3CB, PI3K, PI3Kbeta|EGLN3|PDHA1, PDHA|PFKFB3|HIF1A|HK1|CAMK2A, MGC139375, MGC155201…
Retrograde endocannabinoid signaling	KEGG PATHWAY	bta04723	26	0.00490445	0.0610604	MAPK10|GABRA1, MGC137550|ADCY7|MAPK1, ERK2|GRIA2, GluR-2, GluR-B, GluR-K2, MGC139795| SLC32A1|ABHD6, MGC139241|ADCY2|GNG5|GRIA1|GNAI2|SLC17A6, MGC166269, VGluT2|PLCB4|RIMS1|GNAI1, MGC128528|PRKCB, PRKCB1|GNB1, MGC129044|GABRG2| FAAH, MGC152273|GRIA3|PRKACA|GABRA3|GNAO1|ITPR1|MGLL|GABRA5, MGC139683|
Tight junction	KEGG PATHWAY	bta04530	44	0.00535751	0.0606373	MLLT4|ACTG1|GNAI1, MGC128528|JAM2, MGC151720|CTNNB1, MGC139922|TJP2, MGC159949, zo2|PPP2R2C|PPP2R2A|CSNK2B, CSKN2B, MGC134413|ASH1L|PPP2CB, MGC143390|CTTN, MGC137923|EXOC4, MGC160074|EXOC4, MGC160074|GNAI2|EPB41L3|ACTN4|MRAS|EPB41L2|AKT2|SRC|CLDN11, MGC128478|MYH10|AKT3|CTNNA1, MGC128363|CTNNA1, MGC128363|RAB13, MGC134259|MYH9|MPDZ|CLDN10, MGC179447|CASK, MGC139144|TJP1, zo1|JAM3, MGC140154|OCLN|…
Dopaminergic synapse	KEGG PATHWAY	bta04728	30	0.00733697	0.0794307	PPP2R5A, MGC138101|CAMK2B, MGC128545|GNAI1, MGC128528|SCN1A|PPP3CB|KIF5B| KIF5A|GNAI2|GRIA2, GluR-2, GluR-B, GluR-K2, MGC139795|AKT2|GRIA1|ATF4, MGC126973, MGC179261|PLCB4|AKT3|PPP2R2C|PPP1CB, MGC129042|MAOB, MGC139719|PPP3CA|MAPK10|PRKCB, PRKCB1|CAMK2G| GNB1, MGC129044|PPP2CA|CAMK2D, MGC128576|PRKCA, PKRCA| GRIA3| GNAO1|ITPR1| DDC| CAMK2A, MGC139375, MGC155201|
Glutamatergic synapse	KEGG PATHWAY	bta04724	25	0.00975498	0.0971596	GRIN1|PPP3R1|GNAI1, MGC128528|ADCY7|GRIA2, GluR-2, GluR-B, GluR-K2, MGC139795| ADCY2|MAPK1, ERK2|SLC38A2|GRIA1|GNAI2|SLC17A6, MGC166269, VGluT2|PLCB4|SLC1A3, MGC140731|SLC1A1|PPP3CB|PPP3CA|GNB1, MGC129044 |GLUL, MGC128403|ADRBK1, GRK2|PRKCA, PKRCA|CHP1|PRKACB|GRIA3|GNAO1 |ITPR1|
Protein processing in endoplasmic reticulum	KEGG PATHWAY	bta04141	54	0.016489	0.164232	UBXN6, MGC137213, UBXD1|HSPH1, MGC137965|ERLEC1|EIF2AK3|SEC61B, MGC137059|STT3B, MGC152029|NGLY1|TUSC3|RAD23B, MGC137555| |SEC61A2, MGC137488|CKAP4, LPC-1|SIL1|FBXO2, MGC139756|HERPUD1, MGC152403|SKP1, MGC127638, SKP1A|HSPA4L|MAPK10|MAPK10|UBE4B, MGC140002|ATF4, MGC126973, MGC179261|HSPA1A, HSP70-1, HSPA1|GANAB|SAR1B, MGC127165|SEC31A|canx, MGC166317|UFD1L, MGC142939|P4HB, PDI|SEC23A, MGC143381|U…
Amphetamine addiction	KEGG PATHWAY	bta05031	25	0.0172832	0.148397	CAMK2B, MGC128545|MAOB, MGC139719|SLC18A2|STX1A|GRIA2, GluR-2, GluR-B, GluR-K2, MGC139795|PRKCB, PRKCB1|PPP3R1|GRIA1|ATF4, MGC126973, MGC179261|GRIN2C|PPP3CA|PPP3CA|CAMK2G| |CAMK2D, MGC128576|PRKCA, PKRCA|CHP|GNAS, GNAS1, MGC148689, MGC152036|PRKACB|GRIA3|CALM3, MGC128137, MGC140648|PRKACA|DDC|PPP1CB, MGC129042|FOS, MGC139881|CAMK2A, MGC139375, MGC155201|
Renal cell carcinoma	KEGG PATHWAY	bta05211	25	0.0172832	0.148397	FLCN, MGC128946|SLC2A1, MGC139716|CRK|ARNT2|PTPN11, SHP2|MAPK1, ERK2|PAK1, MGC139676|PIK3R2, MGC138113|AKT2|TCEB1, MGC137138|VEGFA, VEGF|PIK3R1|AKT3|EPAS1|HIF1A|MAP2K1|SOS1|RAP1B|EGLN1|GAB1|PIK3CB, PI3K, PI3Kbeta|EGLN3|RAPGEF1|PAK2|MAP2K2, MGC134398, MGC140486|
Cholinergic synapse	KEGG PATHWAY	bta04725	22	0.0200683	0.146971	CAMK2B, MGC128545|GNAI1, MGC128528|GNA11, MGC128352|ADCY7| PIK3R2, MGC138113|ADCY2| PIK3R1|ATF4, MGC126973, MGC179261|PLCB4|AKT3| GNAI2|AKT2|CAMK2G|GNB1, MGC129044|CAMK2D, MGC128576| JAK2| PRKCB, PRKCB1|PIK3CB, PI3K, PI3Kbeta|PRKACA| ITPR1|CAMK2A, MGC139375, MGC155201| GNAO1
Gap junction	KEGG PATHWAY	bta04540	29	0.0404428	0.263456	TUBA4A, MGC139408|GNAI1, MGC128528|GUCY1A3, GUCY1A1|GNA11, MGC128352|ADCY7|ADCY2|GJA1, MGC128721|SRC|MAPK1, ERK2|TUBA1B|PDGFRB|LPAR1, EDG2|GNAI2|MAP2K1|SOS1|PRKCB, PRKCB1|TJP1, zo1|GUCY1B3, GUCY1B1|ADCY3, ADCY8|PRKCA, PKRCA|GNAS, GNAS1, MGC148689, MGC152036|PRKACB|PDGFRA|CSNK1D, MGC166392|PRKACA|PLCB4|ITPR1|TUBA1C, MGC126961, TUBA1, TUBA4A|MAP2K2, MGC134398, MGC140486|
Wnt signaling pathway	KEGG PATHWAY	bta04310	47	0.0412304	0.276462	PRICKLE1, MGC148920|PPP2R5A, MGC138101|CREBBP, hmm291030|CAMK2B, MGC128545|PPP3R1|RUVBL1|RHOA, ARHA|PRKCA, PKRCA|PRKCA, PKRCA|PSEN1|FZD3|DAAM2|CSNK2B, CSKN2B, MGC134413|PPP2CB, MGC143390|PLCB4|NLK|DVL1|ROCK2, ROCK-II|RAC3, MGC166020|SKP1, MGC127638, SKP1A|SENP2, MGC142409|LEF1|SMAD2|SIAH1|CTBP1|CTBP1|JUN|CCND3, MGC128700|APC, MGC140121|PPP3CA|PPP3CA|ROCK1, ROCK-I, p160ROCK|PPARD, PPAR-beta|CAMK2G…
Neurotrophin signaling pathway	KEGG PATHWAY	bta04722	32	0.0410736	0.263456	CAMK2B, MGC128545| CRK|PLCG1 |PTPN11, SHP2|MAPK1, ERK2|PIK3R2, MGC138113|GAB1|ARHGD|PIK3R1|RPS6KA6|ATF4, MGC126973, MGC179261|AKT3|PRDM4|MATK|ABL1|NFKB1|AKT2| SOS2|MAP3K5, ASK1|MAPK10|RAP1B|CAMK2G|CAMK2D, MGC128576|SHC1, p66shc|MAP2K7|YWHAE|PIK3CB, PI3K, PI3Kbeta| NGFRAP1, BEX3, WBP5|RAPGEF1|CAMK2A, MGC139375, MGC155201|RPS6KA5, MSK1|MAP2K2, MGC134398, MGC140486|
Morphine addiction	KEGG PATHWAY	bta05032	30	0.0430441	0.263456	ADCY3, ADCY8|GNAI1, MGC128528|GABRA1, MGC137550|GNG11|GNAI2|PDE1B, MGC139720|ADCY2|GNG5|GABBR2|ADCY7|GRK6|PDE1A, PDE1| |GABBR1, MGC140191|PRKCB, PRKCB1|PDE2A|PDE4B, MGC152127, MGC154987|GNB1, MGC129044|GABRG2|ADRBK1, GRK2|PDE4A|PRKCA, PKRCA|GNAS, GNAS1, MGC148689, MGC152036|PRKACB|PDE7B, MGC151559|PRKACA|GABRA3|GNAO1|GNAO1|GABRA5, MGC139683|GNB5, MGC142963|
MAPK signaling pathway	KEGG PATHWAY	bta04010	76	0.04338	0.263456	PPM1B, MGC134549|FGF13, MGC159655|FGFR1, MGC151817|PRKCB, PRKCB1|RASGRP3, MGC139060|ELK1|DUSP7|CRK|FGFR3|NF1|RPS6KA4|MAP3K4|PPM1A|CACNB1|NLK|MAPK1, ERK2|PAK1, MGC139676|CACNB3|CACNA2D2|MAPK8IP3|MAP2K3, MGC151903|AKT2|RAC3, MGC166020|PPP3R1|HSPA1A, HSP70-1, HSPA1|RAPGEF2|ATF4, MGC126973, MGC179261|CACNA2D3|AKT3|DUSP1, MGC128230, MKP-1|PDGFRB|MAP2K4, MGC140244|RASGRF1|NFKB1|HSPB1|MAP4K3|CACNG5|CACN…
