# Supplementary material for: Exploring the Mechanisms of Electroacupuncture-Induced Analgesia through RNA Sequencing of the Periaqueductal Gray
Source: Int J Mol Sci. 2017 Dec 25;19(1):2. doi: 10.3390/ijms19010002 (PMC5795954; doi:10.3390/ijms19010002)
Supplement: Supplementary file 1 [file ijms-19-00002-s001.zip › Table S3-qPCR primer.xlsx]

## Sheet: qPCR genes
Gene ID	Genename	CON001-readcount	CON002-readcount	CON003-readcount	EA001-readcount	EA002-readcount	EA003-readcount	CON001-rpkm	CON002-rpkm	CON003-rpkm	EA001-rpkm	EA002-rpkm	EA003-rpkm	CON_readcount	EA_readcount	CON_rpkm	EA_rpkm	log2.Fold_change.	Pvalue	Corrected P-Value	Blast swiss prot	cellular_component	molecular_function	biological_process
GOAT_ENSBTAP00000012523	DBI	7729	7464	7080	4534	3858	4303	4817.07	4190.59	3401.08	1341.39	1271.2	1631.85	6757.67	4231.67	4136.25	1414.81	-1.54793	2.17e-06	9.21e-06	sp|P07107|ACBP_BOVIN Diazepam-binding inhibitor OS=Bos taurus GN=DBI PE=1 SV=2//8.08074e-53	GO:0005739	GO:0008289//GO:0000062	GO:0006641//GO:0001942//GO:0006810//GO:0043588
GOAT_ENSBTAP00000042463	Pcsk1n	10448	12782	9041	4243	3950	4712	5430.17	6730.82	5350.2	2007.51	1855.56	2201.32	10757	4301.67	5837.06	2021.46	-1.52984	3.72e-14	6.44e-13	sp|Q9QXU9|A4IFR2_BOVIN Proprotein convertase 1 inhibitor OS=Bos taurus GN=PCSK1N PE=1 SV=1//2.30929e-12	GO:0005615//GO:0030141//GO:0005802	GO:0004867	GO:0002021//GO:0009409//GO:0016486
Novel03202	TMSB4	42584	45623	48758	24311	19904	20562	3272.42	3552.18	4266.2	1700.71	1382.49	1420.32	45655	21592.3	3696.93	1501.17	-1.30024	1.12e-11	1.24e-10	sp|P62326|TYB4_BOVIN Thymosin beta-4 OS=Bos taurus GN=TMSB4 PE=1 SV=1//2.59312e-18	GO:0005737	GO:0003779	GO:0007010
Novel00296	TMSB10	13463	14832	13832	6324	5598	6058	2536.62	2831.41	2967.37	1084.7	953.336	1025.99	14042.3	5993.33	2778.47	1021.34	-1.44383	4.15e-20	1.97e-18	sp|P21752|TYB10_BOVIN Thymosin beta-10 OS=Bos taurus GN=TMSB10 PE=1 SV=2//9.03405e-15	GO:0005737	GO:0003779	GO:0007010
GOAT_ENSP00000413218	FAM213B	9345	10999	8761	3444	3596	2995	1773.15	2114.51	1892.75	594.888	616.717	510.813	9701.67	3345	1926.81	574.139	-1.74674	2.45e-21	1.4e-19	sp|Q58CY6|PGFS_BOVIN Prostamide/prostaglandin F synthase OS=Bos taurus GN=FAM213B PE=2 SV=1//9.09181e-58	GO:0005737//GO:0005829	GO:0016616//GO:0016491	GO:0006633//GO:0001516//GO:0055114//GO:0008610
GOAT_ENSBTAP00000006478	PENK	1014	1397	1758	3234	3900	3982	185.667	227.62	255.364	467.479	566.876	582.548	1389.67	3705.33	222.884	538.968	1.27381	9.1883e-05	0.00080404	sp|P01211|PENK_BOVIN proenkephalin OS=Bos taurus GN=PENK PE=1 SV=1//2.3312e-151	GO:0007218//GO:0007610//GO:0042742//GO:0019233//GO:0001662	GO:0005576	GO:0001515
GOAT_ENSBTAP00000010386	POMC	79	76	85	271	221	307	12.8311	12.1883	13.7073	48.3507	44.8951	55.4959	80	266.333	12.9089	49.5805	1.94141	1.24e-05	4.58e-05	sp|P01191|COLI_SHEEP Pro-opiomelanocortin OS=Ovis aries GN=POMC PE=1 SV=1//9.71725e-74	GO:0007218//GO:0032098//GO:0033059//GO:0045944//GO:0007165//GO:0007267//GO:0008217//GO:0006091//GO:0032720	GO:0005737//GO:0005782//GO:0005615//GO:0030141//GO:0005576	GO:0005179//GO:0031782//GO:0070996//GO:0031781//GO:0001664//GO:0005102
GOAT_ENSBTAP00000008279	PDYN	14	8	5	164	179	127	1.93846	1.26122	0.701437	20.6714	22.2783	15.894	9	156.333	1.30037	19.6145	3.91492	2.82e-07	2.11e-06	sp|Q95104|PDYN_BOVIN Preprodynorphin OS=Bos taurus GN=PDYN PE=2 SV=1//6.45179e-159
GOAT_ENSBTAP00000001209	OPRK1	8	21	20	234	218	197	1.10737	2.21757	2.2445	20.4436	20.2321	19.0302	16.3333	216.333	1.85648	19.902	3.4221	1.1106e-05	0.00035987	sp|Q2KIP6|OPRK_BOVIN Kappa-type opioid receptor OS=Bos taurus GN=OPRK1 PE=2 SV=1//1.65329e-14	GO:0051607//GO:0007200//GO:0038003//GO:0007165//GO:0006955//GO:0007186	GO:0016020//GO:0016021//GO:0005886	GO:0004930//GO:0005515//GO:0004871//GO:0004985//GO:0004872
GOAT_ENSBTAP00000017997	GFAP	25203	12971	14188	154736	120785	142274	2416.63	1260.14	1549	13506.8	10468.1	12262.6	17454	139265	1741.92	12079.2	2.79377	5.26e-25	5.52e-23	sp|Q28115|GFAP_BOVIN Glial fibrillary acidic protein OS=Bos taurus GN=GFAP PE=2 SV=2//3.22526e-61	GO:0005737//GO:0005882//GO:0016020//GO:0005624//GO:0044464//GO:0044297//GO:0042995	GO:0005515//GO:0005198	GO:0045109//GO:0060291//GO:0060020//GO:0045103//GO:0051580//GO:0030198//GO:0010977//GO:0014002//GO:0010625//GO:0031102
GOAT_ENSBTAP00000027804	DDC	82	19	29	385	182	1834	6.0883	1.4293	2.45162	26.0224	12.2138	122.399	43.3333	800.333	3.32307	53.5452	4.01017	0.121771	0.196357	sp|P27718|DDC_BOVIN Aromatic-L-amino-acid decarboxylase OS=Bos taurus GN=DDC PE=2 SV=2//0
GOAT_ENSP00000391056	SYT1	48	78	30	298	356	464	5.81539	9.57461	4.13839	32.8669	38.984	50.5305	52	372.667	6.50946	40.7938	2.64774	5.47e-07	2.58e-06	sp|P48018|SYT1_BOVIN Synaptotagmin-1 OS=Bos taurus GN=SYT1 PE=1 SV=1//4.62355e-14	GO:0008021//GO:0045202//GO:0030054//GO:0005737//GO:0031410//GO:0016021//GO:0016020//GO:0043005//GO:0030141//GO:0042584//GO:0030672//GO:0042734	GO:0048306//GO:0005509//GO:0005215//GO:0046872//GO:0050750//GO:0005516//GO:0005515	GO:0006810//GO:0007269//GO:0016079
GOAT_ENSBTAP00000007628	GRIA1	143	173	116	1272	1184	1426	6.14892	7.537	5.67929	49.7915	46.0165	55.1163	144	1294	6.45507	50.3081	2.96229	6.81e-24	6.04e-22	sp|Q38PU8|GRIA1_MACFA Glutamate receptor 1 OS=Macaca fascicularis GN=GRIA1 PE=2 SV=1//0	GO:0008021//GO:0032281//GO:0030425//GO:0045202//GO:0030288//GO:0032590//GO:0030054//GO:0016021//GO:0016020//GO:0044309//GO:0043005//GO:0043025//GO:0009986//GO:0008328//GO:0045211//GO:0014069//GO:0005886//GO:0043197//GO:0005624	GO:0004971//GO:0004970//GO:0005215//GO:0005216//GO:0005234//GO:0005515//GO:0004872	GO:0007616//GO:0007268//GO:0035235//GO:0006811//GO:0006810//GO:0031623
GOAT_ENSP00000265113	Slc1a3	109	93	50	3584	2836	3162	7.19873	6.22302	3.75987	215.478	169.291	187.711	84	3194	5.72721	190.826	5.05829	8.9e-75	1.89e-70	sp|P24942|EAA1_RAT Excitatory amino acid transporter 1 OS=Rattus norvegicus GN=Slc1a3 PE=1 SV=2//2.03247e-10	GO:0042995//GO:0043205//GO:0016021//GO:0016020//GO:0043025//GO:0009986//GO:0005886	GO:0016597//GO:0016595//GO:0017153//GO:0015293//GO:0005314//GO:0005515	GO:0015813//GO:0021545//GO:0050806//GO:0009416//GO:0031223//GO:0051938//GO:0043200//GO:0050885//GO:0009611//GO:0048667//GO:0009449//GO:0007605//GO:0006810//GO:0006835//GO:0010035//GO:0070779//GO:0042493//GO:0006536//GO:0006537//GO:0046677
GOAT_ENSBTAP00000022907	GABBR1	861	764	535	5063	4352	4930	34.0053	30.5721	24.0586	182.035	155.357	175.02	720	4781.67	29.5453	170.804	2.53134	7.5e-19	2.92e-17	sp|Q9UBS5|GABR1_HUMAN Gamma-aminobutyric acid type B receptor subunit 1 OS=Homo sapiens GN=GABBR1 PE=1 SV=1//0	GO:0005737//GO:0042734//GO:0016021//GO:0016020//GO:0045211	GO:0004930//GO:0005515//GO:0004965	GO:0007214//GO:0007186

## Sheet: qPCR primer
Gene ID	Genename	Primers(5'-3')	Sequences	product length
GOAT_ENSBTAP00000042463	Pcsk1n	Forward	CTAACGGGAATCGCCGACA	140
		Reverse	GCAGGGGTCTCCAGACGCT
GOAT_ENSBTAP00000012523	DBI	Forward	AGCTTAAGACCAAGCCAGCAG	127
		Reverse	TCCCACTTGGCCTTGCCTTT
GOAT_ENSBTAP00000006478	PENK	Forward	GGCGACCGTGAGGGCAGAATG	139
		Reverse	GCAGGTTTCCCAGGTCTTGAG
GOAT_ENSBTAP00000010386	POMC	Forward	GGCGGCCGAGAAGAAGGAC	148
		Reverse	CTTGATGATGGCGTTTTTGA
GOAT_ENSBTAP00000008279	PDYN	Forward	CTTTCCTCACTCCCTTCACCG	186
		Forward	TCTCCACCAGGCTGCTACTCA
GOAT_ENSBTAP00000001209	OPRK1	Reverse	CGTCTTCGTCGTCTGCTGG	158
		Forward	CAAGGAAGGCATAGAGAATGG
GOAT_ENSBTAP00000007628	GRIA1	Reverse	GGACTGTGAATCGGAACGC	189
		Forward	TTGGCCGGGATAGTATCAGTGTAG
GOAT_ENSP00000265113	Slcla3/EAA1	Reverse	CATCACGGCTCTGGGAACTT	87
		Forward	CGTTTGTCCACGCCATTGTT
GOAT_ENSBTAP00000022907	GABBR1	Reverse	AACAGATAAGTGGATTGGAGGGT	243
		Forward	AAGACGGCGGCTAATGCTA
Novel03202	TMSB4	Forward	TCTGACAAACCCGATATGGCT	129
		Reverse	CGACTCGCCTGCTTGCTT
Novel00296	TMSB10	Forward	ATGGCAGACAAGCCCGAC	129
		Reverse	TCACTTTGCTTGCTTCTCCTG
GOAT_ENSP00000413218	FAM213B	Forward	GGACCTCAGCAACCTCAAGGG	226
		Reverse	GGCGGCCACATCACGAACA
GOAT_ENSBTAP00000017997	GFAP	Forward	ACACAGTATGAGGCAGTGGC	176
		Reverse	GACTCCAGGTCGCAAGTCAA
GOAT_ENSBTAP00000027804	DDC	Forward	GGCACAGTCCCTACTTCTTCG	151
		Forward	CAGTCCATCATCACCGTCTCA
GOAT_ENSP00000391056	SYT1	Reverse	ACACGGTGGATTTCGGTCAC	187
		Forward	GGATCAGACAAGCCACCCAC
Internal control gene	β-actin	Reverse	GTGCTGTCCCTGTACGCCTCT	226
		Forward	CCTTGATGTCACGGACGATTC
